# Supplementary material for: Synthesis, Characterization, Antimicrobial, Density Functional Theory, and Molecular Docking Studies of Novel Mn(II), Fe(III), and Cr(III) Complexes Incorporating 4-(2-Hydroxyphenyl azo)-1-naphthol (Az)
Source: PubMed Central journal article supplement — ACS Omega. 2023 Jul 14;8(29):25877–91. doi: 10.1021/acsomega.3c01413 (PMC10373178; doi:10.1021/acsomega.3c01413), 2023-07-14
Supplement: ao3c01413_si_001.pdf [file ao3c01413_si_001.pdf]

**Synthesis, Characterization, Antimicrobial, DFT and Molecular Docking Studies of novel Mn(II), Fe(III) and Cr(III) Complexes Incorporating 4-(2-hydroxyphenyl azo)-1-naphthol (Az)**

Hany M. Abd El-Lateef<sup>1,2\*</sup>, Mai M. Khalaf<sup>1,2</sup>, Amer A. Amer<sup>2</sup>, Mahmoud Kandeel<sup>3,4</sup>, Antar A. Abdelhamid<sup>2,5</sup>, Aly Abdou<sup>2</sup>

<sup>1</sup>Department of Chemistry, College of Science, King Faisal University, Al-Ahsa 31982, Saudi Arabia

<sup>2</sup>Department of Chemistry, Faculty of Science, Sohag University, Sohag 82524, Egypt

<sup>3</sup> Department of Biomedical Sciences, College of Veterinary Medicine, King Faisal University, 31982 Al-Ahsa, Saudi Arabia

<sup>4</sup>Department of Pharmacology, Faculty of Veterinary Medicine, Kafrelsheikh University, 33516 Kafrelsheikh, Egypt

<sup>5</sup>Chemistry Department, Faculty of Science, Albaha University, Albaha 1988, Saudi Arabia

## 1. Instruments for Characterization

The compositions of the complexes were determined using elemental analysis (for C, H, and N content), molar conductance ( $10^{-3}$  mol/L DMF and acetonitrile solution), thermal decomposition (TGA), magnetic measurements, infrared (IR) spectroscopy, and electronic spectra ( $10^{-3}$  mol/L acetonitrile solution). Elemental analysis was performed at the University of Cairo's Central Laboratory using a Perkin-Elmer 2408 analyzer. Infrared spectra of KBr pellets were obtained using a Shimadzu DR-8001 spectrometer and an infrared spectrometer.  $^1\text{H-NMR}$  spectra of DMSO- $d_6$  were obtained using a Bruker DRX 400 MHz instrument with TMS as a reference. Mass spectra were carried out using Direct Inlet part to the mass analyzer in Thermo Scientific GCMS model ISQ. UV-Vis spectra were obtained using a Jenway UV-Vis spectrophotometer. Thermal decomposition (TGA) analysis was performed on the required compounds using a Shimadzu type 60 H analyzer. The molar conductance of a DMF and acetonitrile solution ( $10^{-3}$  mol/L) was measured using a JENWAY model 4320 electronic conductivity meter. The molar magnetic susceptibility of powdered materials was determined using a Bartington Susceptibility machine (model 4320). The stoichiometry of the compounds was determined using a continuous-variation spectrophotometric method.

**List of Figures**

Figure (S1.a):  $^1\text{H}$ -NMR of the AZ free ligand

Figure (S1.b):  $^{13}\text{C}$ -NMR of the AZ free ligand

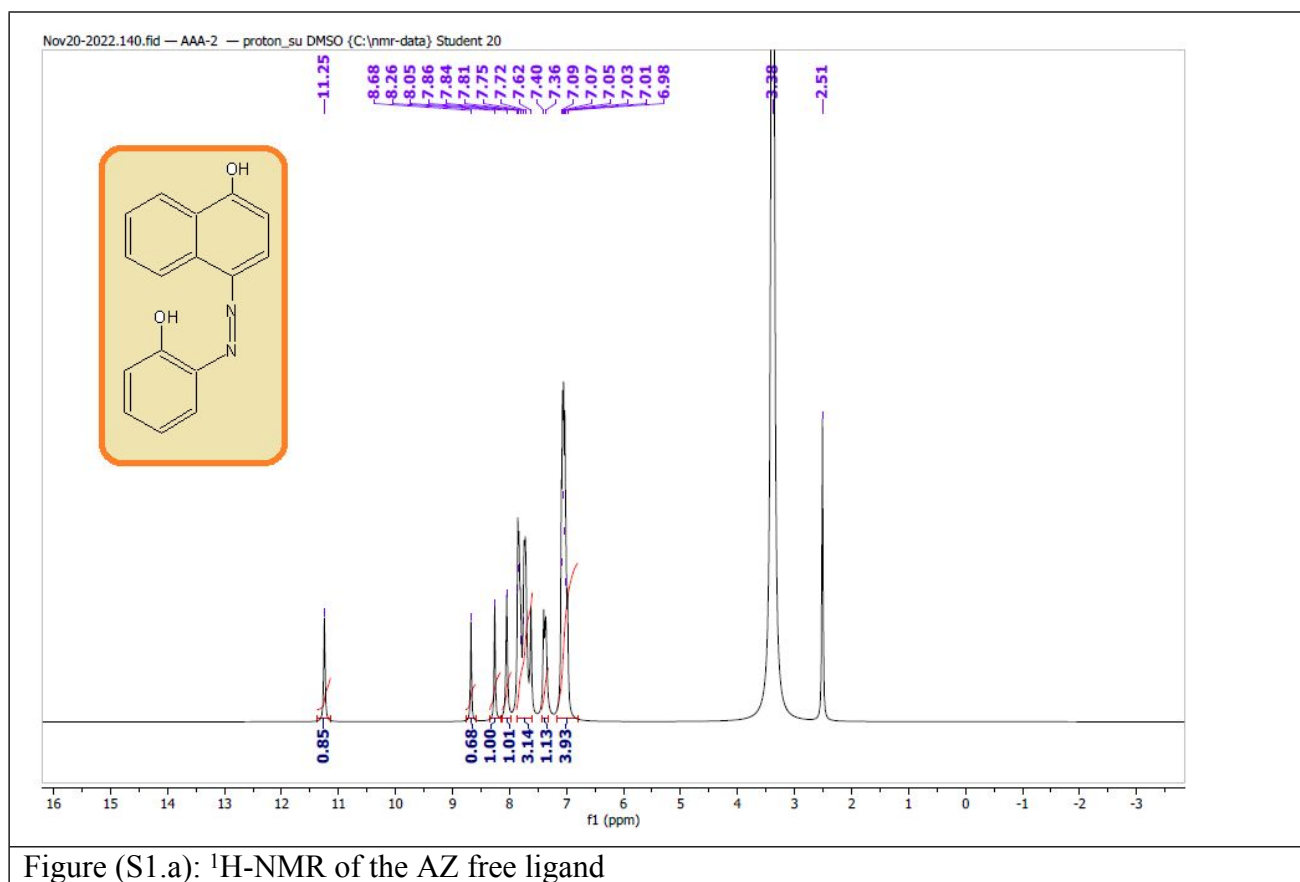

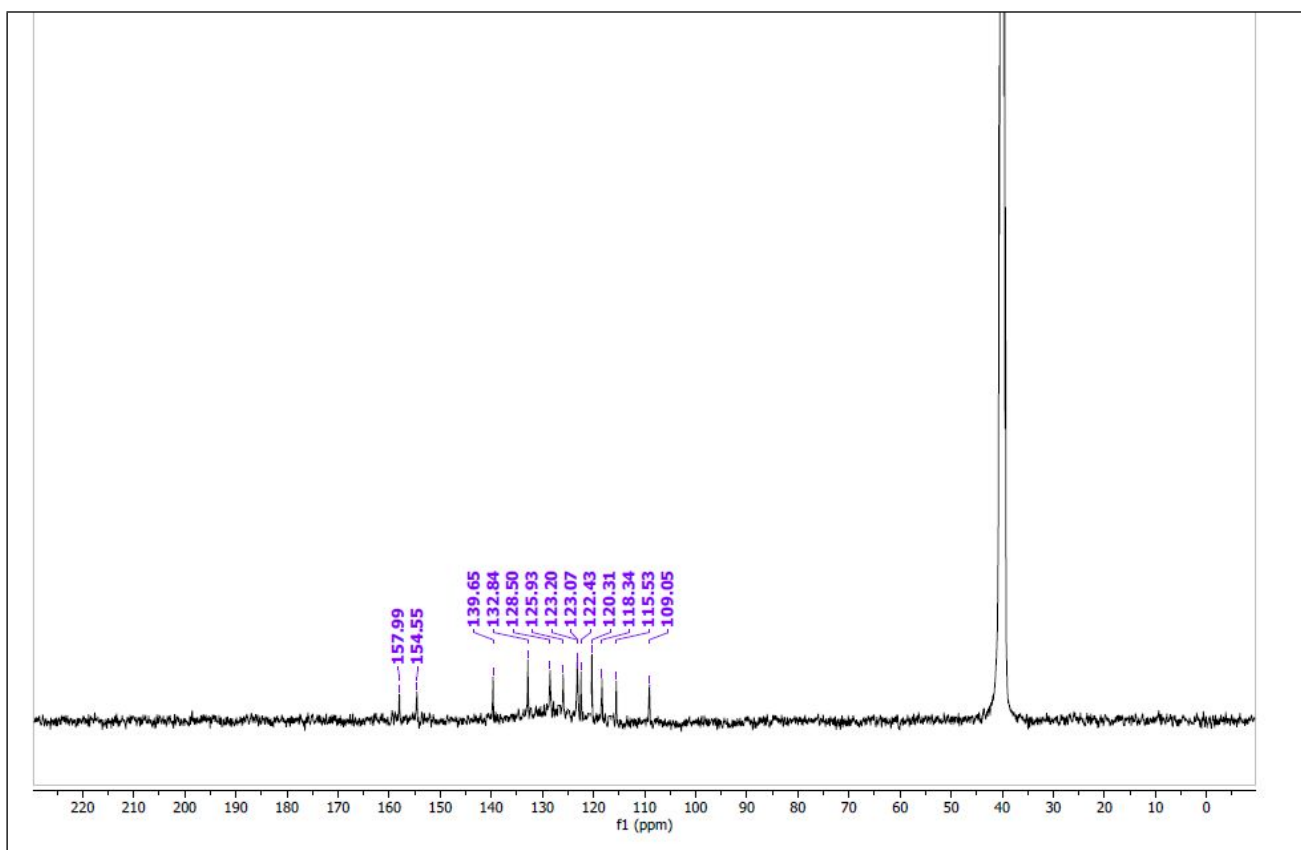

Figure (S2.a): <sup>13</sup>C-NMR of the AZ free ligand

## List of Tables

**Table (S1):** Binding energy of the studied complexes based on DFT/B3LYP with cc-PVQZ basis set in ethanol as solvent.

**Table (S2):** Comparison between the minimum inhibition concentrations (MIC) of the current compounds with previously reported compounds in the literature survey against *E. coli*.

**Table (S3):** The bond parameters (bond length, bond angles, and dihedral angles) of the free ligand and its metal complexes

**Table (S4):** Summary of Natural Population Analysis

**Table (S5):** NBO data of the Ligand

**Table (S6):** Summary of Natural Population Analysis of the Cr(III) complex:

**Table (S7):** NBO data of the Cr(III) complex

**Table (S8):** Summary of Natural Population Analysis of the Mn(II) complex

**Table (S9):** NBO data of the Mn(II) complex:

**Table (S10):** Summary of Natural Population Analysis of the Fe(III) complex:

**Table (S11):** NBO data of the Fe(III) complex:

**Table (S1):** Binding energy of the studied complexes based on DFT/B3LYP with cc-PVQZ basis set in ethanol as solvent.

|                         | E <sub>Total</sub> | Binding |
|-------------------------|--------------------|---------|
| <b>Az</b>               | -29028.12          |         |
| <b>CrAz<sub>2</sub></b> | -117049.33         | -475.78 |
| <b>MnAz<sub>2</sub></b> | -112342.85         | -589.06 |
| <b>FeAz<sub>2</sub></b> | -123228.14         | -692.26 |
| <b>Cr(III)</b>          | -33569.30          |         |
| <b>Mn(II)</b>           | -39198.19          |         |
| <b>Fe(III)</b>          | -39531.63          |         |
| <b>H<sub>2</sub>O</b>   | -7249.68           |         |
| <b>Cl(-1)</b>           | -17698.33          |         |

| <b>Table (S2):</b> Comparison between the minimum inhibition concentrations (MIC) of the current compounds with previously reported compounds in the literature survey against <i>E. coli</i> . |                           |             |                  |
|-------------------------------------------------------------------------------------------------------------------------------------------------------------------------------------------------|---------------------------|-------------|------------------|
|                                                                                                                                                                                                 | <b>E. coli (G-)</b>       |             |                  |
|                                                                                                                                                                                                 |                           | <b>MIC</b>  |                  |
| 1                                                                                                                                                                                               | <b>CrHPN</b>              | <b>12.5</b> | <b>This work</b> |
| 2                                                                                                                                                                                               | <b>MnHPN</b>              | <b>6.25</b> |                  |
| 3                                                                                                                                                                                               | <b>FeHPN</b>              | <b>6.25</b> |                  |
| 4                                                                                                                                                                                               | <b>Co:FMBT (1:1)</b>      | 100.00      | <b>1</b>         |
| 5                                                                                                                                                                                               | <b>Co:FMBT (1:2)</b>      | 125.00      |                  |
| 6                                                                                                                                                                                               | <b>Ni:FMBT (1:1)</b>      | 125.00      |                  |
| 7                                                                                                                                                                                               | <b>Ni:FMBT (1:2)</b>      | 62.50       |                  |
| 8                                                                                                                                                                                               | <b>Pd:FMBT (1:1)</b>      | 125.00      |                  |
| 9                                                                                                                                                                                               | <b>Pd:FMBT (1:2)</b>      | 100.00      |                  |
| 10                                                                                                                                                                                              | <b>FeLQ</b>               | 25.50       | <b>2</b>         |
| 11                                                                                                                                                                                              | <b>FeLB</b>               | 22.50       |                  |
| 12                                                                                                                                                                                              | <b>FeLI</b>               | 23.50       |                  |
| 13                                                                                                                                                                                              | <b>CuLQ</b>               | 21.50       | <b>3</b>         |
| 14                                                                                                                                                                                              | <b>CuLB</b>               | 22.50       |                  |
| 15                                                                                                                                                                                              | <b>CuLI</b>               | 22.50       |                  |
| 16                                                                                                                                                                                              | <b>NiLQ</b>               | 35.50       | <b>4</b>         |
| 17                                                                                                                                                                                              | <b>NiLB</b>               | 34.50       |                  |
| 18                                                                                                                                                                                              | <b>NiLI</b>               | 37.50       |                  |
| 19                                                                                                                                                                                              | <b>FeL</b>                | 50.00       | <b>5</b>         |
| 20                                                                                                                                                                                              | <b>CoL</b>                | 55.00       |                  |
| 21                                                                                                                                                                                              | <b>NiL</b>                | 60.00       |                  |
| 22                                                                                                                                                                                              | <b>CuL</b>                | 50.00       |                  |
| 23                                                                                                                                                                                              | <b>ZnL</b>                | 70.00       |                  |
| 24                                                                                                                                                                                              | <b>3a</b>                 | 25.20       | <b>6</b>         |
| 25                                                                                                                                                                                              | <b>3b</b>                 | 78.50       |                  |
| 26                                                                                                                                                                                              | <b>3c</b>                 | 18.20       |                  |
| 27                                                                                                                                                                                              | <b>3e</b>                 | 15.40       |                  |
| 28                                                                                                                                                                                              | <b>[Ag(3-Py-CHO)2NO3]</b> | 62.50       | <b>7</b>         |
| 29                                                                                                                                                                                              | <b>[Pd(HL)(Cl2)].H2O</b>  | 12.50       | <b>8</b>         |
| 30                                                                                                                                                                                              | <b>[Pt(HL)(Cl2)].2H2O</b> | 25.00       |                  |

<sup>1</sup> A. Skotnicka, E. Kolehmainen, P. Czelen, A. Valkonen, R. Gawinecki, Synthesis and structural characterization of substituted 2-phenacylbenzoxazoles. *Int. J. Mol. Sci.* 14 (2013) 4444–4460. <https://doi.org/10.3390/ijms14034444>.

<sup>2</sup> M. Rahimizadeh, H. Eshghi, A. Shiri, Z. Ghadamyari, M.M. Matin, F. Oroojalian, P. Pordeli, Fe(HSO<sub>4</sub>)<sub>3</sub> as an Efficient Catalyst for Diazotization and Diazo Coupling Reactions. *J. Korean Chem. Soc.* 56 (2012) 716-719. <https://doi.org/10.5012/jkcs.2012.56.6.716>.

<sup>3</sup> A. Shomali, H. Valizadeh, S. Noorshargh, New Generation of Nitrite Functionalized Star-like Polyvinyl Imidazolium Compound: Application as a Nitrosonium Source and Three Dimensional Nanocatalyst for the Synthesis of Azo Dyes. *Lett. Org. Chem.* 14 (2017) 14, 409–418. DOI: <https://doi.org/10.2174/1570178614666170321125216>.



- <sup>4</sup> M. Akki, D.S. Reddy, K.S. Katagi, A. Kumar, H.C. Devarajegowda, V. Babagond, S. Mane, S.D. Joshi, Synthesis of coumarin-thioether conjugates as potential anti-tubercular agents: Their molecular docking and X-ray crystal studies. *J. Mol. Struct.* 1266 (2022) 133452. <https://doi.org/10.1016/j.molstruc.2022.133452>.
- <sup>5</sup> F. Perveen, R. Qureshi, F.L. Ansari, S. Kalsoom, S. Ahmed, Investigations of drug–DNA interactions using molecular docking, cyclic voltammetry and UV–Vis spectroscopy. *J. Mol. Struct.* 1004 (2011) 67–73. <https://doi.org/10.1016/j.molstruc.2011.07.027>.
- <sup>6</sup> X.-Y. Meng, H.-X. Zhang, M. Mezei, M. Cui, Molecular Docking: A Powerful Approach for Structure-Based Drug Discovery. *Curr. Comput. Aided Drug Des.* 7 (2011) 146–157. DOI: <https://doi.org/10.2174/157340911795677602>.
- <sup>7</sup> M. Akki, D.S. Reddy, K.S. Katagi, A. Kumar, H.C. Devarajegowda, V. Babagond, S. Mane, S.D. Joshi, Synthesis of coumarin-thioether conjugates as potential anti-tubercular agents: Their molecular docking and X-ray crystal studies. *J. Mol. Struct.* 1266 (2022) 133452. <https://doi.org/10.1016/j.molstruc.2022.133452>.
- <sup>8</sup> R.G. Deghadi, A.A. Abbas, G.G. Mohamed, Theoretical and experimental investigations of new bis(amino triazole) Schiff base ligand: Preparation of its UO<sub>2</sub>(II), Er (III) and La (III) complexes, studying of their antibacterial, anticancer and molecular docking. *Appl. Organomet. Chem.* 35 (2021) e6292. <https://doi.org/10.1002/aoc.6292>.

| <b>Table (S3):</b> The bond parameters (bond length, bond angles, and dihedral angles) of the free ligand and its metal complexes |              |                        |              |                       |              |                        |              |
|-----------------------------------------------------------------------------------------------------------------------------------|--------------|------------------------|--------------|-----------------------|--------------|------------------------|--------------|
| <b>Ligand</b>                                                                                                                     |              | <b>Cr(III) complex</b> |              | <b>Mn(II) complex</b> |              | <b>Fe(III) complex</b> |              |
| <b>Bond Length</b>                                                                                                                | <b>value</b> | <b>Bond Length</b>     | <b>value</b> | <b>Bond Length</b>    | <b>value</b> | <b>Bond Length</b>     | <b>value</b> |
| O(20)-H(31)                                                                                                                       | 0.9495       | Cl(66)-Cr(67)          | 2.2794       | O(68)-Mn(69)          | 1.9131       | Cl(66)-Fe(67)          | 2.2282       |
| O(19)-H(32)                                                                                                                       | 0.9501       | O(65)-Cr(67)           | 1.9235       | H(67)-O(68)           | 0.9892       | O(65)-Fe(67)           | 1.8708       |
| C(18)-H(30)                                                                                                                       | 1.0952       | O(62)-Cr(67)           | 1.9218       | H(66)-O(68)           | 0.9888       | O(62)-Fe(67)           | 1.8652       |
| C(17)-H(29)                                                                                                                       | 1.0962       | O(62)-H(64)            | 0.9876       | O(65)-Mn(69)          | 1.9237       | O(62)-H(64)            | 0.9881       |
| C(17)-C(18)                                                                                                                       | 1.3857       | O(62)-H(63)            | 0.9896       | O(62)-Mn(69)          | 1.9247       | O(62)-H(63)            | 0.9907       |
| C(16)-H(28)                                                                                                                       | 1.0948       | O(50)-H(60)            | 1.0079       | O(62)-H(64)           | 0.9879       | O(50)-H(60)            | 1.0073       |
| C(16)-C(18)                                                                                                                       | 1.3943       | C(49)-H(59)            | 1.0824       | O(62)-H(63)           | 0.9866       | C(49)-H(59)            | 1.0823       |
| C(15)-O(19)                                                                                                                       | 1.3618       | C(48)-H(58)            | 1.0814       | O(50)-H(60)           | 1.008        | C(48)-H(58)            | 1.0825       |
| C(15)-C(17)                                                                                                                       | 1.4049       | C(48)-C(49)            | 1.3368       | C(49)-H(59)           | 1.0824       | C(48)-C(49)            | 1.337        |
| C(14)-H(27)                                                                                                                       | 1.0977       | C(47)-H(57)            | 1.0824       | C(48)-H(58)           | 1.0827       | C(47)-H(57)            | 1.0823       |
| C(14)-C(16)                                                                                                                       | 1.3866       | C(47)-C(49)            | 1.4731       | C(48)-C(49)           | 1.3369       | C(47)-C(49)            | 1.4745       |
| C(13)-C(15)                                                                                                                       | 1.4126       | C(46)-O(65)            | 1.3936       | C(47)-H(57)           | 1.0823       | C(46)-O(65)            | 1.3918       |
| C(13)-C(14)                                                                                                                       | 1.4013       | C(46)-C(48)            | 1.4813       | C(47)-C(49)           | 1.4737       | C(46)-C(48)            | 1.4801       |
| N(12)-C(13)                                                                                                                       | 1.4422       | C(45)-H(56)            | 1.0829       | C(46)-O(65)           | 1.3918       | C(45)-H(56)            | 1.0827       |
| N(11)-N(12)                                                                                                                       | 1.234        | C(45)-C(47)            | 1.3371       | C(46)-C(48)           | 1.4805       | C(45)-C(47)            | 1.3379       |
| C(10)-H(26)                                                                                                                       | 1.0952       | C(44)-C(46)            | 1.3524       | C(45)-H(56)           | 1.0828       | C(44)-C(46)            | 1.3511       |
| C(9)-H(25)                                                                                                                        | 1.0972       | C(44)-C(45)            | 1.482        | C(45)-C(47)           | 1.3375       | C(44)-C(45)            | 1.4814       |
| C(9)-C(10)                                                                                                                        | 1.3696       | N(43)-C(44)            | 1.4304       | C(44)-C(46)           | 1.352        | N(43)-C(44)            | 1.4314       |
| C(8)-H(24)                                                                                                                        | 1.0948       | N(42)-Cr(67)           | 2.001        | C(44)-C(45)           | 1.4819       | N(42)-Fe(67)           | 1.9384       |
| C(8)-C(10)                                                                                                                        | 1.4111       | N(42)-N(43)            | 1.2712       | N(43)-C(44)           | 1.4313       | N(42)-N(43)            | 1.2723       |
| C(7)-H(23)                                                                                                                        | 1.0962       | C(41)-H(55)            | 1.0824       | N(42)-Mn(69)          | 2.0063       | C(41)-H(55)            | 1.0825       |
| C(7)-C(8)                                                                                                                         | 1.3692       | C(40)-H(54)            | 1.0822       | N(42)-N(43)           | 1.2716       | C(40)-H(54)            | 1.0816       |
| C(6)-N(11)                                                                                                                        | 1.4418       | C(40)-C(41)            | 1.3352       | C(41)-H(55)           | 1.0824       | C(40)-C(41)            | 1.3349       |
| C(5)-H(22)                                                                                                                        | 1.0977       | C(39)-H(53)            | 1.0825       | C(40)-H(54)           | 1.0816       | C(39)-H(53)            | 1.0826       |
| C(5)-C(6)                                                                                                                         | 1.3798       | C(39)-C(41)            | 1.4716       | C(40)-C(41)           | 1.3352       | C(39)-C(41)            | 1.4709       |
| C(4)-C(9)                                                                                                                         | 1.4216       | C(38)-H(52)            | 1.0788       | C(39)-H(53)           | 1.0826       | C(38)-H(52)            | 1.0783       |
| C(4)-C(6)                                                                                                                         | 1.4355       | C(38)-C(39)            | 1.3374       | C(39)-C(41)           | 1.4716       | C(38)-C(39)            | 1.3372       |
| C(3)-H(21)                                                                                                                        | 1.0965       | C(37)-N(42)            | 1.4324       | C(38)-H(52)           | 1.0789       | C(37)-N(42)            | 1.4328       |
| C(3)-C(5)                                                                                                                         | 1.4062       | C(36)-H(61)            | 1.0824       | C(38)-C(39)           | 1.3373       | C(36)-H(61)            | 1.0796       |
| C(2)-C(4)                                                                                                                         | 1.4136       | C(36)-C(37)            | 1.3383       | C(37)-N(42)           | 1.4328       | C(36)-C(37)            | 1.3371       |
| C(2)-C(7)                                                                                                                         | 1.4206       | C(35)-C(40)            | 1.4869       | C(36)-H(61)           | 1.0821       | C(35)-C(40)            | 1.4874       |
| C(1)-O(20)                                                                                                                        | 1.3647       | C(35)-C(37)            | 1.4904       | C(36)-C(37)           | 1.3386       | C(35)-C(37)            | 1.4918       |
| C(1)-C(3)                                                                                                                         | 1.3818       | C(34)-H(51)            | 1.083        | C(35)-C(40)           | 1.4864       | C(34)-H(51)            | 1.083        |
| C(1)-C(2)                                                                                                                         | 1.4337       | C(34)-C(36)            | 1.4713       | C(35)-C(37)           | 1.4903       | C(34)-C(36)            | 1.4704       |
| <b>Bond Angles</b>                                                                                                                |              | C(33)-C(35)            | 1.3604       | C(34)-H(51)           | 1.0829       | C(33)-C(35)            | 1.3611       |
| H(31)-O(20)-C(1)                                                                                                                  | 108.0501     | C(33)-C(38)            | 1.4922       | C(34)-C(36)           | 1.4714       | C(33)-C(38)            | 1.4928       |
| H(32)-O(19)-C(15)                                                                                                                 | 108.8189     | C(32)-O(50)            | 1.3987       | C(33)-C(35)           | 1.3603       | C(32)-O(50)            | 1.399        |
| H(30)-C(18)-C(17)                                                                                                                 | 119.6629     | C(32)-C(34)            | 1.3388       | C(33)-C(38)           | 1.4921       | C(32)-C(34)            | 1.3384       |
| H(30)-C(18)-C(16)                                                                                                                 | 119.7381     | C(32)-C(33)            | 1.5016       | C(32)-O(50)           | 1.3986       | C(32)-C(33)            | 1.5027       |
| C(17)-C(18)-C(16)                                                                                                                 | 120.599      | O(20)-H(30)            | 1.0079       | C(32)-C(34)           | 1.3386       | O(20)-H(30)            | 1.0075       |
| H(29)-C(17)-C(18)                                                                                                                 | 120.4956     | O(19)-Cr(67)           | 1.9341       | C(32)-C(33)           | 1.5014       | O(19)-Fe(67)           | 1.885        |
| H(29)-C(17)-C(15)                                                                                                                 | 119.9881     | C(18)-H(29)            | 1.0823       | O(20)-H(30)           | 1.0076       | C(18)-H(29)            | 1.0824       |
| C(18)-C(17)-C(15)                                                                                                                 | 119.5163     | C(17)-H(28)            | 1.0827       | O(19)-Mn(69)          | 1.9331       | C(17)-H(28)            | 1.0826       |
| H(28)-C(16)-C(18)                                                                                                                 | 119.7716     | C(17)-C(18)            | 1.3368       | C(18)-H(29)           | 1.0824       | C(17)-C(18)            | 1.3379       |
| H(28)-C(16)-C(14)                                                                                                                 | 119.7977     | C(16)-H(27)            | 1.0824       | C(17)-H(28)           | 1.0827       | C(16)-H(27)            | 1.0822       |
| C(18)-C(16)-C(14)                                                                                                                 | 120.4307     | C(16)-C(18)            | 1.4729       | C(17)-C(18)           | 1.3367       | C(16)-C(18)            | 1.4754       |

|                         |           |                     |          |                    |          |                     |          |
|-------------------------|-----------|---------------------|----------|--------------------|----------|---------------------|----------|
| O(19)-C(15)-C(17)       | 115.3294  | C(15)-O(19)         | 1.3926   | C(16)-H(27)        | 1.0824   | C(15)-O(19)         | 1.3908   |
| O(19)-C(15)-C(13)       | 124.5944  | C(15)-C(17)         | 1.4811   | C(16)-C(18)        | 1.473    | C(15)-C(17)         | 1.4803   |
| C(17)-C(15)-C(13)       | 120.0762  | C(14)-H(26)         | 1.0829   | C(15)-O(19)        | 1.3942   | C(14)-H(26)         | 1.0827   |
| H(27)-C(14)-C(16)       | 119.4703  | C(14)-C(16)         | 1.3372   | C(15)-C(17)        | 1.481    | C(14)-C(16)         | 1.3383   |
| H(27)-C(14)-C(13)       | 120.4325  | C(13)-C(15)         | 1.3504   | C(14)-H(26)        | 1.0828   | C(13)-C(15)         | 1.3437   |
| C(16)-C(14)-C(13)       | 120.0971  | C(13)-C(14)         | 1.4823   | C(14)-C(16)        | 1.3372   | C(13)-C(14)         | 1.4809   |
| C(15)-C(13)-C(14)       | 119.2806  | N(12)-C(13)         | 1.4288   | C(13)-C(15)        | 1.3526   | N(12)-C(13)         | 1.4259   |
| C(15)-C(13)-N(12)       | 116.4941  | N(11)-Cr(67)        | 2.0106   | C(13)-C(14)        | 1.4822   | N(11)-Fe(67)        | 1.9549   |
| C(14)-C(13)-N(12)       | 124.2253  | N(11)-N(12)         | 1.2712   | N(12)-C(13)        | 1.4299   | N(11)-N(12)         | 1.2717   |
| C(13)-N(12)-N(11)       | 119.7143  | C(10)-H(25)         | 1.0825   | N(11)-Mn(69)       | 2.0009   | C(10)-H(25)         | 1.0824   |
| N(12)-N(11)-C(6)        | 120.2291  | C(9)-H(24)          | 1.0823   | N(11)-N(12)        | 1.2706   | C(9)-H(24)          | 1.082    |
| H(26)-C(10)-C(9)        | 120.3505  | C(9)-C(10)          | 1.3352   | C(10)-H(25)        | 1.0825   | C(9)-C(10)          | 1.335    |
| H(26)-C(10)-C(8)        | 119.1607  | C(8)-H(23)          | 1.0826   | C(9)-H(24)         | 1.0785   | C(8)-H(23)          | 1.0826   |
| C(9)-C(10)-C(8)         | 120.4888  | C(8)-C(10)          | 1.4716   | C(9)-C(10)         | 1.3351   | C(8)-C(10)          | 1.4715   |
| H(25)-C(9)-C(10)        | 119.6605  | C(7)-H(22)          | 1.079    | C(8)-H(23)         | 1.0826   | C(7)-H(22)          | 1.0787   |
| H(25)-C(9)-C(4)         | 119.6154  | C(7)-C(8)           | 1.3375   | C(8)-C(10)         | 1.4711   | C(7)-C(8)           | 1.3376   |
| C(10)-C(9)-C(4)         | 120.7241  | C(6)-N(11)          | 1.4315   | C(7)-H(22)         | 1.0787   | C(6)-N(11)          | 1.4312   |
| H(24)-C(8)-C(10)        | 119.3209  | C(5)-H(31)          | 1.0832   | C(7)-C(8)          | 1.3372   | C(5)-H(31)          | 1.0819   |
| H(24)-C(8)-C(7)         | 120.4939  | C(5)-C(6)           | 1.3388   | C(6)-N(11)         | 1.4328   | C(5)-C(6)           | 1.3369   |
| C(10)-C(8)-C(7)         | 120.1852  | C(4)-C(9)           | 1.4855   | C(5)-H(31)         | 1.0826   | C(4)-C(9)           | 1.4868   |
| H(23)-C(7)-C(8)         | 119.9077  | C(4)-C(6)           | 1.4884   | C(5)-C(6)          | 1.3383   | C(4)-C(6)           | 1.489    |
| H(23)-C(7)-C(2)         | 119.6249  | C(3)-H(21)          | 1.0829   | C(4)-C(9)          | 1.4851   | C(3)-H(21)          | 1.0829   |
| C(8)-C(7)-C(2)          | 120.4673  | C(3)-C(5)           | 1.4715   | C(4)-C(6)          | 1.4904   | C(3)-C(5)           | 1.4714   |
| N(11)-C(6)-C(5)         | 123.4007  | C(2)-C(4)           | 1.3601   | C(3)-H(21)         | 1.0829   | C(2)-C(4)           | 1.3599   |
| N(11)-C(6)-C(4)         | 116.0376  | C(2)-C(7)           | 1.4922   | C(3)-C(5)          | 1.4706   | C(2)-C(7)           | 1.4924   |
| C(5)-C(6)-C(4)          | 120.5617  | C(1)-O(20)          | 1.3986   | C(2)-C(4)          | 1.361    | C(1)-O(20)          | 1.3988   |
| H(22)-C(5)-C(6)         | 121.4636  | C(1)-C(3)           | 1.3392   | C(2)-C(7)          | 1.4925   | C(1)-C(3)           | 1.3392   |
| H(22)-C(5)-C(3)         | 117.8788  | C(1)-C(2)           | 1.5017   | C(1)-O(20)         | 1.3988   | C(1)-C(2)           | 1.5023   |
| C(6)-C(5)-C(3)          | 120.6576  | <b>Bond Angles</b>  |          | C(1)-C(3)          | 1.3384   | <b>Bond Angles</b>  |          |
| C(9)-C(4)-C(6)          | 122.2952  | Cl(66)-Cr(67)-O(65) | 89.345   | C(1)-C(2)          | 1.5022   | Cl(66)-Fe(67)-O(65) | 74.7263  |
| C(9)-C(4)-C(2)          | 118.6136  | Cl(66)-Cr(67)-O(62) | 88.5937  | <b>Bond Angles</b> |          | Cl(66)-Fe(67)-O(62) | 71.548   |
| C(6)-C(4)-C(2)          | 119.0912  | Cl(66)-Cr(67)-N(42) | 88.9102  | O(68)-Mn(69)-O(65) | 89.7527  | Cl(66)-Fe(67)-N(42) | 90.1183  |
| H(21)-C(3)-C(5)         | 118.8444  | Cl(66)-Cr(67)-O(19) | 178.1789 | O(68)-Mn(69)-O(62) | 89.1426  | Cl(66)-Fe(67)-O(19) | 163.77   |
| H(21)-C(3)-C(1)         | 121.2686  | Cl(66)-Cr(67)-N(11) | 91.5894  | O(68)-Mn(69)-N(42) | 90.7184  | Cl(66)-Fe(67)-N(11) | 108.9723 |
| C(5)-C(3)-C(1)          | 119.8871  | O(65)-Cr(67)-O(62)  | 177.9297 | O(68)-Mn(69)-O(19) | 179.5957 | O(65)-Fe(67)-O(62)  | 144.0427 |
| C(4)-C(2)-C(7)          | 119.5209  | O(65)-Cr(67)-N(42)  | 89.8324  | O(68)-Mn(69)-N(11) | 89.3339  | O(65)-Fe(67)-N(42)  | 90.7546  |
| C(4)-C(2)-C(1)          | 118.6178  | O(65)-Cr(67)-O(19)  | 90.0151  | O(65)-Mn(69)-O(62) | 178.8762 | O(65)-Fe(67)-O(19)  | 110.6881 |
| C(7)-C(2)-C(1)          | 121.8613  | O(65)-Cr(67)-N(11)  | 89.2169  | O(65)-Mn(69)-N(42) | 89.5823  | O(65)-Fe(67)-N(11)  | 85.751   |
| O(20)-C(1)-C(3)         | 122.3321  | O(62)-Cr(67)-N(42)  | 90.3206  | O(65)-Mn(69)-O(19) | 89.94    | O(62)-Fe(67)-N(42)  | 101.3284 |
| O(20)-C(1)-C(2)         | 116.4833  | O(62)-Cr(67)-O(19)  | 92.0511  | O(65)-Mn(69)-N(11) | 88.918   | O(62)-Fe(67)-O(19)  | 105.1625 |
| C(3)-C(1)-C(2)          | 121.1846  | O(62)-Cr(67)-N(11)  | 90.6479  | O(62)-Mn(69)-N(42) | 90.2254  | O(62)-Fe(67)-N(11)  | 93.5875  |
| <b>Dihedral Angles</b>  |           | N(42)-Cr(67)-O(19)  | 89.383   | O(62)-Mn(69)-O(19) | 91.1657  | N(42)-Fe(67)-O(19)  | 74.7676  |
| C(15)-C(17)-C(18)-C(16) | -0.0044   | N(42)-Cr(67)-N(11)  | 178.9209 | O(62)-Mn(69)-N(11) | 91.2752  | N(42)-Fe(67)-N(11)  | 158.8249 |
| C(15)-C(17)-C(18)-H(30) | -179.9962 | O(19)-Cr(67)-N(11)  | 90.1066  | N(42)-Mn(69)-O(19) | 89.5421  | O(19)-Fe(67)-N(11)  | 86.9391  |
| H(29)-C(17)-C(18)-C(16) | 179.9948  | Cr(67)-O(65)-C(46)  | 116.3996 | N(42)-Mn(69)-N(11) | 178.4992 | Fe(67)-O(65)-C(46)  | 113.8384 |
| H(29)-C(17)-C(18)-H(30) | 0.003     | Cr(67)-O(62)-H(64)  | 109.3842 | O(19)-Mn(69)-N(11) | 90.3976  | Fe(67)-O(62)-H(64)  | 106.804  |
| C(14)-C(16)-C(18)-C(17) | 0.0052    | Cr(67)-O(62)-H(63)  | 107.858  | Mn(69)-O(68)-H(67) | 107.368  | Fe(67)-O(62)-H(63)  | 107.4385 |
| C(14)-C(16)-C(18)-H(30) | 179.997   | H(64)-O(62)-H(63)   | 105.3912 | Mn(69)-O(68)-H(66) | 106.8329 | H(64)-O(62)-H(63)   | 104.0478 |
| H(28)-C(16)-C(18)-C(17) | 179.9974  | H(60)-O(50)-C(32)   | 114.9478 | H(67)-O(68)-H(66)  | 105.2546 | H(60)-O(50)-C(32)   | 115.2868 |
| H(28)-C(16)-C(18)-H(30) | -0.0108   | H(59)-C(49)-C(48)   | 120.2013 | Mn(69)-O(65)-C(46) | 116.244  | H(59)-C(49)-C(48)   | 120.1722 |
| C(13)-C(15)-O(19)-H(32) | -0.0291   | H(59)-C(49)-C(47)   | 119.8797 | Mn(69)-O(62)-H(64) | 108.3596 | H(59)-C(49)-C(47)   | 119.8962 |
| C(17)-C(15)-O(19)-H(32) | 179.975   | C(48)-C(49)-C(47)   | 119.9167 | Mn(69)-O(62)-H(63) | 108.6036 | C(48)-C(49)-C(47)   | 119.9272 |
| C(13)-C(15)-C(17)-C(18) | 0.0039    | H(58)-C(48)-C(49)   | 119.5573 | H(64)-O(62)-H(63)  | 104.6257 | H(58)-C(48)-C(49)   | 119.773  |
| C(13)-C(15)-C(17)-H(29) | -179.9953 | H(58)-C(48)-C(46)   | 119.8136 | H(60)-O(50)-C(32)  | 114.9085 | H(58)-C(48)-C(46)   | 119.7645 |

|                         |           |                    |          |                    |          |                    |          |
|-------------------------|-----------|--------------------|----------|--------------------|----------|--------------------|----------|
| O(19)-C(15)-C(17)-C(18) | 180       | C(49)-C(48)-C(46)  | 120.6291 | H(59)-C(49)-C(48)  | 120.2001 | C(49)-C(48)-C(46)  | 120.4623 |
| O(19)-C(15)-C(17)-H(29) | 0.0008    | H(57)-C(47)-C(49)  | 119.8663 | H(59)-C(49)-C(47)  | 119.8842 | H(57)-C(47)-C(49)  | 119.8419 |
| C(13)-C(14)-C(16)-C(18) | -0.0054   | H(57)-C(47)-C(45)  | 120.1958 | C(48)-C(49)-C(47)  | 119.9147 | H(57)-C(47)-C(45)  | 120.17   |
| C(13)-C(14)-C(16)-H(28) | -179.9976 | C(49)-C(47)-C(45)  | 119.9334 | H(58)-C(48)-C(49)  | 119.7808 | C(49)-C(47)-C(45)  | 119.9814 |
| H(27)-C(14)-C(16)-C(18) | -180      | O(65)-C(46)-C(48)  | 117.566  | H(58)-C(48)-C(46)  | 119.6735 | O(65)-C(46)-C(48)  | 118.0448 |
| H(27)-C(14)-C(16)-H(28) | 0.0078    | O(65)-C(46)-C(44)  | 122.8463 | C(49)-C(48)-C(46)  | 120.5448 | O(65)-C(46)-C(44)  | 122.0893 |
| N(12)-C(13)-C(15)-C(17) | -179.9952 | C(48)-C(46)-C(44)  | 119.5149 | H(57)-C(47)-C(49)  | 119.8512 | C(48)-C(46)-C(44)  | 119.7132 |
| N(12)-C(13)-C(15)-O(19) | 0.0091    | H(56)-C(45)-C(47)  | 119.596  | H(57)-C(47)-C(45)  | 120.1922 | H(56)-C(45)-C(47)  | 119.705  |
| C(14)-C(13)-C(15)-C(17) | -0.0041   | H(56)-C(45)-C(44)  | 119.6968 | C(49)-C(47)-C(45)  | 119.9538 | H(56)-C(45)-C(44)  | 119.7301 |
| C(14)-C(13)-C(15)-O(19) | -179.9998 | C(47)-C(45)-C(44)  | 120.707  | O(65)-C(46)-C(48)  | 117.4855 | C(47)-C(45)-C(44)  | 120.5648 |
| N(12)-C(13)-C(14)-C(16) | 179.9952  | C(46)-C(44)-C(45)  | 119.2737 | O(65)-C(46)-C(44)  | 122.7585 | C(46)-C(44)-C(45)  | 119.303  |
| N(12)-C(13)-C(14)-H(27) | -0.0102   | C(46)-C(44)-N(43)  | 123.2844 | C(48)-C(46)-C(44)  | 119.6855 | C(46)-C(44)-N(43)  | 122.5354 |
| C(15)-C(13)-C(14)-C(16) | 0.0049    | C(45)-C(44)-N(43)  | 117.1462 | H(56)-C(45)-C(47)  | 119.6119 | C(45)-C(44)-N(43)  | 117.8158 |
| C(15)-C(13)-C(14)-H(27) | 179.9994  | C(44)-N(43)-N(42)  | 125.1601 | H(56)-C(45)-C(44)  | 119.6994 | C(44)-N(43)-N(42)  | 123.668  |
| N(11)-N(12)-C(13)-C(14) | 0.051     | Cr(67)-N(42)-N(43) | 120.6673 | C(47)-C(45)-C(44)  | 120.6884 | Fe(67)-N(42)-N(43) | 120.1676 |
| N(11)-N(12)-C(13)-C(15) | -179.9583 | Cr(67)-N(42)-C(37) | 121.4338 | C(46)-C(44)-C(45)  | 119.2017 | Fe(67)-N(42)-C(37) | 121.0363 |
| C(6)-N(11)-N(12)-C(13)  | 179.9964  | N(43)-N(42)-C(37)  | 117.8395 | C(46)-C(44)-N(43)  | 123.254  | N(43)-N(42)-C(37)  | 118.7947 |
| C(4)-C(9)-C(10)-C(8)    | 0.0032    | H(55)-C(41)-C(40)  | 120.1347 | C(45)-C(44)-N(43)  | 117.2699 | H(55)-C(41)-C(40)  | 120.142  |
| C(4)-C(9)-C(10)-H(26)   | -179.995  | H(55)-C(41)-C(39)  | 119.7741 | C(44)-N(43)-N(42)  | 125.1607 | H(55)-C(41)-C(39)  | 119.7507 |
| H(25)-C(9)-C(10)-C(8)   | 179.9969  | C(40)-C(41)-C(39)  | 120.0869 | Mn(69)-N(42)-N(43) | 120.5497 | C(40)-C(41)-C(39)  | 120.1039 |
| H(25)-C(9)-C(10)-H(26)  | -0.0012   | H(54)-C(40)-C(41)  | 118.89   | Mn(69)-N(42)-C(37) | 121.5983 | H(54)-C(40)-C(41)  | 118.6915 |
| C(7)-C(8)-C(10)-C(9)    | -0.0046   | H(54)-C(40)-C(35)  | 120.6236 | N(43)-N(42)-C(37)  | 117.7916 | H(54)-C(40)-C(35)  | 120.791  |
| C(7)-C(8)-C(10)-H(26)   | 179.9936  | C(41)-C(40)-C(35)  | 120.4864 | H(55)-C(41)-C(40)  | 120.134  | C(41)-C(40)-C(35)  | 120.5152 |
| H(24)-C(8)-C(10)-C(9)   | 179.9989  | H(53)-C(39)-C(41)  | 119.5656 | H(55)-C(41)-C(39)  | 119.7607 | H(53)-C(39)-C(41)  | 119.5655 |
| H(24)-C(8)-C(10)-H(26)  | -0.0029   | H(53)-C(39)-C(38)  | 120.0916 | C(40)-C(41)-C(39)  | 120.0946 | H(53)-C(39)-C(38)  | 120.089  |
| C(2)-C(7)-C(8)-C(10)    | 0.0058    | C(41)-C(39)-C(38)  | 120.3358 | H(54)-C(40)-C(41)  | 118.8317 | C(41)-C(39)-C(38)  | 120.3416 |
| C(2)-C(7)-C(8)-H(24)    | -179.9977 | H(52)-C(38)-C(39)  | 117.5795 | H(54)-C(40)-C(35)  | 120.669  | H(52)-C(38)-C(39)  | 117.3864 |
| H(23)-C(7)-C(8)-C(10)   | 179.9975  | H(52)-C(38)-C(33)  | 121.8448 | C(41)-C(40)-C(35)  | 120.4917 | H(52)-C(38)-C(33)  | 122.0137 |
| H(23)-C(7)-C(8)-H(24)   | -0.006    | C(39)-C(38)-C(33)  | 120.558  | H(53)-C(39)-C(41)  | 119.5761 | C(39)-C(38)-C(33)  | 120.591  |
| C(4)-C(6)-N(11)-N(12)   | 179.8859  | N(42)-C(37)-C(36)  | 119.598  | H(53)-C(39)-C(38)  | 120.0925 | N(42)-C(37)-C(36)  | 119.6227 |
| C(5)-C(6)-N(11)-N(12)   | -0.1306   | N(42)-C(37)-C(35)  | 120.654  | C(41)-C(39)-C(38)  | 120.319  | N(42)-C(37)-C(35)  | 120.7777 |
| C(3)-C(5)-C(6)-C(4)     | -0.0015   | C(36)-C(37)-C(35)  | 119.5357 | H(52)-C(38)-C(39)  | 117.5907 | C(36)-C(37)-C(35)  | 119.58   |
| C(3)-C(5)-C(6)-N(11)    | -179.9843 | H(61)-C(36)-C(37)  | 120.469  | H(52)-C(38)-C(33)  | 121.8385 | H(61)-C(36)-C(37)  | 120.5852 |
| H(22)-C(5)-C(6)-C(4)    | 179.9977  | H(61)-C(36)-C(34)  | 118.9842 | C(39)-C(38)-C(33)  | 120.5556 | H(61)-C(36)-C(34)  | 118.727  |
| H(22)-C(5)-C(6)-N(11)   | 0.0148    | C(37)-C(36)-C(34)  | 120.5457 | N(42)-C(37)-C(36)  | 119.6413 | C(37)-C(36)-C(34)  | 120.663  |
| C(2)-C(4)-C(9)-C(10)    | -0.003    | C(40)-C(35)-C(37)  | 120.1459 | N(42)-C(37)-C(35)  | 120.7133 | C(40)-C(35)-C(37)  | 120.1708 |
| C(2)-C(4)-C(9)-H(25)    | -179.9968 | C(40)-C(35)-C(33)  | 119.7465 | C(36)-C(37)-C(35)  | 119.4752 | C(40)-C(35)-C(33)  | 119.7108 |
| C(6)-C(4)-C(9)-C(10)    | -179.9984 | C(37)-C(35)-C(33)  | 120.0893 | H(61)-C(36)-C(37)  | 120.523  | C(37)-C(35)-C(33)  | 120.1044 |
| C(6)-C(4)-C(9)-H(25)    | 0.0079    | H(51)-C(34)-C(36)  | 118.9444 | H(61)-C(36)-C(34)  | 118.9415 | H(51)-C(34)-C(36)  | 118.8794 |
| C(2)-C(4)-C(6)-C(5)     | 0.0059    | H(51)-C(34)-C(32)  | 120.0586 | C(37)-C(36)-C(34)  | 120.5286 | H(51)-C(34)-C(32)  | 120.0469 |
| C(2)-C(4)-C(6)-N(11)    | 179.99    | C(36)-C(34)-C(32)  | 120.9693 | C(40)-C(35)-C(37)  | 120.1688 | C(36)-C(34)-C(32)  | 121.0526 |
| C(9)-C(4)-C(6)-C(5)     | -179.9987 | C(35)-C(33)-C(38)  | 118.7694 | C(40)-C(35)-C(33)  | 119.7325 | C(35)-C(33)-C(38)  | 118.7268 |
| C(9)-C(4)-C(6)-N(11)    | -0.0147   | C(35)-C(33)-C(32)  | 119.2159 | C(37)-C(35)-C(33)  | 120.0669 | C(35)-C(33)-C(32)  | 119.2047 |
| C(1)-C(3)-C(5)-C(6)     | -0.0046   | C(38)-C(33)-C(32)  | 121.9748 | H(51)-C(34)-C(36)  | 118.942  | C(38)-C(33)-C(32)  | 122.0556 |
| C(1)-C(3)-C(5)-H(22)    | 179.9962  | O(50)-C(32)-C(34)  | 117.4363 | H(51)-C(34)-C(32)  | 120.0615 | O(50)-C(32)-C(34)  | 117.2542 |
| H(21)-C(3)-C(5)-C(6)    | -179.9996 | O(50)-C(32)-C(33)  | 123.1914 | C(36)-C(34)-C(32)  | 120.9524 | O(50)-C(32)-C(33)  | 123.3718 |
| H(21)-C(3)-C(5)-H(22)   | 0.0013    | C(34)-C(32)-C(33)  | 119.371  | C(35)-C(33)-C(38)  | 118.7919 | C(34)-C(32)-C(33)  | 119.3701 |
| C(1)-C(2)-C(4)-C(6)     | -0.0043   | H(30)-O(20)-C(1)   | 114.9208 | C(35)-C(33)-C(32)  | 119.2212 | H(30)-O(20)-C(1)   | 115.0838 |
| C(1)-C(2)-C(4)-C(9)     | -179.9998 | Cr(67)-O(19)-C(15) | 119.0678 | C(38)-C(33)-C(32)  | 121.9337 | Fe(67)-O(19)-C(15) | 115.4443 |
| C(7)-C(2)-C(4)-C(6)     | 179.9997  | H(29)-C(18)-C(17)  | 120.2228 | O(50)-C(32)-C(34)  | 117.4695 | H(29)-C(18)-C(17)  | 120.1982 |
| C(7)-C(2)-C(4)-C(9)     | 0.0042    | H(29)-C(18)-C(16)  | 119.9025 | O(50)-C(32)-C(33)  | 123.1755 | H(29)-C(18)-C(16)  | 119.8786 |
| C(1)-C(2)-C(7)-C(8)     | 179.9984  | C(17)-C(18)-C(16)  | 119.8742 | C(34)-C(32)-C(33)  | 119.3547 | C(17)-C(18)-C(16)  | 119.9208 |
| C(1)-C(2)-C(7)-H(23)    | 0.0068    | H(28)-C(17)-C(18)  | 119.7222 | H(30)-O(20)-C(1)   | 115.1596 | H(28)-C(17)-C(18)  | 119.8695 |
| C(4)-C(2)-C(7)-C(8)     | -0.0057   | H(28)-C(17)-C(15)  | 119.6346 | Mn(69)-O(19)-C(15) | 118.2087 | H(28)-C(17)-C(15)  | 119.8077 |

|                       |           |                           |           |                          |          |                           |           |
|-----------------------|-----------|---------------------------|-----------|--------------------------|----------|---------------------------|-----------|
| C(4)-C(2)-C(7)-H(23)  | -179.9973 | C(18)-C(17)-C(15)         | 120.6422  | H(29)-C(18)-C(17)        | 120.2093 | C(18)-C(17)-C(15)         | 120.322   |
| C(2)-C(1)-O(20)-H(31) | -179.9896 | H(27)-C(16)-C(18)         | 119.878   | H(29)-C(18)-C(16)        | 119.8916 | H(27)-C(16)-C(18)         | 119.863   |
| C(3)-C(1)-O(20)-H(31) | 0.0176    | H(27)-C(16)-C(14)         | 120.2081  | C(17)-C(18)-C(16)        | 119.8985 | H(27)-C(16)-C(14)         | 120.1856  |
| C(2)-C(1)-C(3)-C(5)   | 0.0062    | C(18)-C(16)-C(14)         | 119.9114  | H(28)-C(17)-C(18)        | 119.7239 | C(18)-C(16)-C(14)         | 119.9456  |
| C(2)-C(1)-C(3)-H(21)  | -179.999  | O(19)-C(15)-C(17)         | 117.0507  | H(28)-C(17)-C(15)        | 119.6187 | O(19)-C(15)-C(17)         | 118.6547  |
| O(20)-C(1)-C(3)-C(5)  | 179.9986  | O(19)-C(15)-C(13)         | 123.3288  | C(18)-C(17)-C(15)        | 120.6561 | O(19)-C(15)-C(13)         | 121.4124  |
| O(20)-C(1)-C(3)-H(21) | -0.0066   | C(17)-C(15)-C(13)         | 119.5958  | H(27)-C(16)-C(18)        | 119.8654 | C(17)-C(15)-C(13)         | 119.8125  |
| C(3)-C(1)-C(2)-C(7)   | 179.9942  | H(26)-C(14)-C(16)         | 119.5755  | H(27)-C(16)-C(14)        | 120.2008 | H(26)-C(14)-C(16)         | 119.7884  |
| C(3)-C(1)-C(2)-C(4)   | -0.0017   | H(26)-C(14)-C(13)         | 119.6778  | C(18)-C(16)-C(14)        | 119.9314 | H(26)-C(14)-C(13)         | 119.8177  |
| O(20)-C(1)-C(2)-C(7)  | 0.0014    | C(16)-C(14)-C(13)         | 120.7461  | O(19)-C(15)-C(17)        | 117.0414 | C(16)-C(14)-C(13)         | 120.3931  |
| O(20)-C(1)-C(2)-C(4)  | -179.9945 | C(15)-C(13)-C(14)         | 119.2222  | O(19)-C(15)-C(13)        | 123.383  | C(15)-C(13)-C(14)         | 119.5752  |
|                       |           | C(15)-C(13)-N(12)         | 123.4595  | C(17)-C(15)-C(13)        | 119.5482 | C(15)-C(13)-N(12)         | 121.6129  |
|                       |           | C(14)-C(13)-N(12)         | 117.0019  | H(26)-C(14)-C(16)        | 119.5789 | C(14)-C(13)-N(12)         | 118.3655  |
|                       |           | C(13)-N(12)-N(11)         | 125.9684  | H(26)-C(14)-C(13)        | 119.6797 | C(13)-N(12)-N(11)         | 123.6942  |
|                       |           | Cr(67)-N(11)-N(12)        | 121.6602  | C(16)-C(14)-C(13)        | 120.7412 | Fe(67)-N(11)-N(12)        | 121.1678  |
|                       |           | Cr(67)-N(11)-C(6)         | 121.0832  | C(15)-C(13)-C(14)        | 119.2156 | Fe(67)-N(11)-C(6)         | 120.6264  |
|                       |           | N(12)-N(11)-C(6)          | 117.2556  | C(15)-C(13)-N(12)        | 123.465  | N(12)-N(11)-C(6)          | 117.8456  |
|                       |           | H(25)-C(10)-C(9)          | 120.1306  | C(14)-C(13)-N(12)        | 117.029  | H(25)-C(10)-C(9)          | 120.1324  |
|                       |           | H(25)-C(10)-C(8)          | 119.7692  | C(13)-N(12)-N(11)        | 125.3502 | H(25)-C(10)-C(8)          | 119.7797  |
|                       |           | C(9)-C(10)-C(8)           | 120.0954  | Mn(69)-N(11)-N(12)       | 122.0391 | C(9)-C(10)-C(8)           | 120.0814  |
|                       |           | H(24)-C(9)-C(10)          | 118.9773  | Mn(69)-N(11)-C(6)        | 119.556  | H(24)-C(9)-C(10)          | 118.8653  |
|                       |           | H(24)-C(9)-C(4)           | 120.5611  | N(12)-N(11)-C(6)         | 118.2929 | H(24)-C(9)-C(4)           | 120.6881  |
|                       |           | C(10)-C(9)-C(4)           | 120.4586  | H(25)-C(10)-C(9)         | 120.1509 | C(10)-C(9)-C(4)           | 120.4369  |
|                       |           | H(23)-C(8)-C(10)          | 119.5794  | H(25)-C(10)-C(8)         | 119.7673 | H(23)-C(8)-C(10)          | 119.5497  |
|                       |           | H(23)-C(8)-C(7)           | 120.0793  | C(9)-C(10)-C(8)          | 120.0817 | H(23)-C(8)-C(7)           | 120.0873  |
|                       |           | C(10)-C(8)-C(7)           | 120.3325  | H(24)-C(9)-C(10)         | 118.7855 | C(10)-C(8)-C(7)           | 120.3584  |
|                       |           | H(22)-C(7)-C(8)           | 117.5988  | H(24)-C(9)-C(4)          | 120.6514 | H(22)-C(7)-C(8)           | 117.5211  |
|                       |           | H(22)-C(7)-C(2)           | 121.8446  | C(10)-C(9)-C(4)          | 120.5507 | H(22)-C(7)-C(2)           | 121.901   |
|                       |           | C(8)-C(7)-C(2)            | 120.54    | H(23)-C(8)-C(10)         | 119.5856 | C(8)-C(7)-C(2)            | 120.5608  |
|                       |           | N(11)-C(6)-C(5)           | 119.5361  | H(23)-C(8)-C(7)          | 120.1079 | N(11)-C(6)-C(5)           | 119.7103  |
|                       |           | N(11)-C(6)-C(4)           | 120.6784  | C(10)-C(8)-C(7)          | 120.3061 | N(11)-C(6)-C(4)           | 120.4716  |
|                       |           | C(5)-C(6)-C(4)            | 119.621   | H(22)-C(7)-C(8)          | 117.5007 | C(5)-C(6)-C(4)            | 119.8181  |
|                       |           | H(31)-C(5)-C(6)           | 120.2959  | H(22)-C(7)-C(2)          | 121.9347 | H(31)-C(5)-C(6)           | 120.4872  |
|                       |           | H(31)-C(5)-C(3)           | 119.1898  | C(8)-C(7)-C(2)           | 120.5456 | H(31)-C(5)-C(3)           | 119.031   |
|                       |           | C(6)-C(5)-C(3)            | 120.468   | N(11)-C(6)-C(5)          | 119.2035 | C(6)-C(5)-C(3)            | 120.453   |
|                       |           | C(9)-C(4)-C(6)            | 120.0532  | N(11)-C(6)-C(4)          | 121.2036 | C(9)-C(4)-C(6)            | 120.0352  |
|                       |           | C(9)-C(4)-C(2)            | 119.8241  | C(5)-C(6)-C(4)           | 119.5895 | C(9)-C(4)-C(2)            | 119.8495  |
|                       |           | C(6)-C(4)-C(2)            | 120.0774  | H(31)-C(5)-C(6)          | 120.4755 | C(6)-C(4)-C(2)            | 120.0876  |
|                       |           | H(21)-C(3)-C(5)           | 118.9526  | H(31)-C(5)-C(3)          | 118.8752 | H(21)-C(3)-C(5)           | 118.9104  |
|                       |           | H(21)-C(3)-C(1)           | 120.0669  | C(6)-C(5)-C(3)           | 120.6474 | H(21)-C(3)-C(1)           | 120.044   |
|                       |           | C(5)-C(3)-C(1)            | 120.9372  | C(9)-C(4)-C(6)           | 120.2694 | C(5)-C(3)-C(1)            | 121.0233  |
|                       |           | C(4)-C(2)-C(7)            | 118.7419  | C(9)-C(4)-C(2)           | 119.6676 | C(4)-C(2)-C(7)            | 118.6895  |
|                       |           | C(4)-C(2)-C(1)            | 119.2063  | C(6)-C(4)-C(2)           | 120.0628 | C(4)-C(2)-C(1)            | 119.1765  |
|                       |           | C(7)-C(2)-C(1)            | 121.9976  | H(21)-C(3)-C(5)          | 118.9245 | C(7)-C(2)-C(1)            | 122.1121  |
|                       |           | O(20)-C(1)-C(3)           | 117.4555  | H(21)-C(3)-C(1)          | 120.054  | O(20)-C(1)-C(3)           | 117.3591  |
|                       |           | O(20)-C(1)-C(2)           | 123.1734  | C(5)-C(3)-C(1)           | 121.0129 | O(20)-C(1)-C(2)           | 123.2395  |
|                       |           | C(3)-C(1)-C(2)            | 119.3704  | C(4)-C(2)-C(7)           | 118.7432 | C(3)-C(1)-C(2)            | 119.3937  |
|                       |           | <b>Dihedral Angles</b>    |           | C(4)-C(2)-C(1)           | 119.2398 | <b>Dihedral Angles</b>    |           |
|                       |           | C(46)-O(65)-Cr(67)-N(11)  | 131.88    | C(7)-C(2)-C(1)           | 122.0105 | C(46)-O(65)-Fe(67)-N(11)  | 106.3112  |
|                       |           | C(46)-O(65)-Cr(67)-O(19)  | 41.7735   | O(20)-C(1)-C(3)          | 117.3183 | C(46)-O(65)-Fe(67)-O(19)  | 21.204    |
|                       |           | C(46)-O(65)-Cr(67)-N(42)  | -47.6094  | O(20)-C(1)-C(2)          | 123.2873 | C(46)-O(65)-Fe(67)-N(42)  | -52.7806  |
|                       |           | C(46)-O(65)-Cr(67)-O(62)  | -141.851  | C(3)-C(1)-C(2)           | 119.3785 | C(46)-O(65)-Fe(67)-O(62)  | -163.4344 |
|                       |           | C(46)-O(65)-Cr(67)-Cl(66) | -136.5214 | <b>Dihedral Angles</b>   |          | C(46)-O(65)-Fe(67)-Cl(66) | -142.6971 |
|                       |           | H(63)-O(62)-Cr(67)-N(11)  | 14.9145   | H(66)-O(68)-Mn(69)-N(11) | 120.689  | H(63)-O(62)-Fe(67)-N(11)  | 14.1734   |

|  |                           |           |                          |           |                           |           |
|--|---------------------------|-----------|--------------------------|-----------|---------------------------|-----------|
|  | H(63)-O(62)-Cr(67)-O(19)  | 105.0444  | H(66)-O(68)-Mn(69)-O(19) | 72.2968   | H(63)-O(62)-Fe(67)-O(19)  | 101.9702  |
|  | H(63)-O(62)-Cr(67)-N(42)  | -165.5615 | H(66)-O(68)-Mn(69)-N(42) | -57.811   | H(63)-O(62)-Fe(67)-N(42)  | 179.0655  |
|  | H(63)-O(62)-Cr(67)-O(65)  | -71.3287  | H(66)-O(68)-Mn(69)-O(62) | -148.0257 | H(63)-O(62)-Fe(67)-O(65)  | -73.5343  |
|  | H(63)-O(62)-Cr(67)-Cl(66) | -76.6595  | H(66)-O(68)-Mn(69)-O(65) | 31.7682   | H(63)-O(62)-Fe(67)-Cl(66) | -94.6399  |
|  | H(64)-O(62)-Cr(67)-N(11)  | -99.2249  | H(67)-O(68)-Mn(69)-N(11) | -126.8135 | H(64)-O(62)-Fe(67)-N(11)  | -96.9659  |
|  | H(64)-O(62)-Cr(67)-O(19)  | -9.095    | H(67)-O(68)-Mn(69)-O(19) | -175.2057 | H(64)-O(62)-Fe(67)-O(19)  | -9.169    |
|  | H(64)-O(62)-Cr(67)-N(42)  | 80.2991   | H(67)-O(68)-Mn(69)-N(42) | 54.6865   | H(64)-O(62)-Fe(67)-N(42)  | 67.9262   |
|  | H(64)-O(62)-Cr(67)-O(65)  | 174.5319  | H(67)-O(68)-Mn(69)-O(62) | -35.5281  | H(64)-O(62)-Fe(67)-O(65)  | 175.3264  |
|  | H(64)-O(62)-Cr(67)-Cl(66) | 169.2011  | H(67)-O(68)-Mn(69)-O(65) | 144.2657  | H(64)-O(62)-Fe(67)-Cl(66) | 154.2208  |
|  | C(46)-C(48)-C(49)-C(47)   | 0.8486    | C(46)-O(65)-Mn(69)-N(11) | 131.5251  | C(46)-C(48)-C(49)-C(47)   | 1.2477    |
|  | C(46)-C(48)-C(49)-H(59)   | -179.7019 | C(46)-O(65)-Mn(69)-O(19) | 41.1262   | C(46)-C(48)-C(49)-H(59)   | -179.5164 |
|  | H(58)-C(48)-C(49)-C(47)   | -179.1917 | C(46)-O(65)-Mn(69)-N(42) | -48.4163  | H(58)-C(48)-C(49)-C(47)   | -178.899  |
|  | H(58)-C(48)-C(49)-H(59)   | 0.2579    | C(46)-O(65)-Mn(69)-O(62) | -128.5681 | H(58)-C(48)-C(49)-H(59)   | 0.337     |
|  | C(45)-C(47)-C(49)-C(48)   | 0.4586    | C(46)-O(65)-Mn(69)-O(68) | -139.1365 | C(45)-C(47)-C(49)-C(48)   | 0.5303    |
|  | C(45)-C(47)-C(49)-H(59)   | -178.9927 | H(63)-O(62)-Mn(69)-N(11) | 3.6704    | C(45)-C(47)-C(49)-H(59)   | -178.7077 |
|  | H(57)-C(47)-C(49)-C(48)   | 179.685   | H(63)-O(62)-Mn(69)-O(19) | 94.0942   | H(57)-C(47)-C(49)-C(48)   | 179.5829  |
|  | H(57)-C(47)-C(49)-H(59)   | 0.2337    | H(63)-O(62)-Mn(69)-N(42) | -176.3592 | H(57)-C(47)-C(49)-H(59)   | 0.3449    |
|  | C(44)-C(46)-O(65)-Cr(67)  | 36.9544   | H(63)-O(62)-Mn(69)-O(65) | -96.2136  | C(44)-C(46)-O(65)-Fe(67)  | 40.8314   |
|  | C(48)-C(46)-O(65)-Cr(67)  | -146.1671 | H(63)-O(62)-Mn(69)-O(68) | -85.6441  | C(48)-C(46)-O(65)-Fe(67)  | -143.6759 |
|  | C(44)-C(46)-C(48)-C(49)   | -1.8439   | H(64)-O(62)-Mn(69)-N(11) | -109.435  | C(44)-C(46)-C(48)-C(49)   | -2.5822   |
|  | C(44)-C(46)-C(48)-H(58)   | 178.1964  | H(64)-O(62)-Mn(69)-O(19) | -19.0112  | C(44)-C(46)-C(48)-H(58)   | 177.5644  |
|  | O(65)-C(46)-C(48)-C(49)   | -178.8305 | H(64)-O(62)-Mn(69)-N(42) | 70.5354   | O(65)-C(46)-C(48)-C(49)   | -178.1856 |
|  | O(65)-C(46)-C(48)-H(58)   | 1.2099    | H(64)-O(62)-Mn(69)-O(65) | 150.681   | O(65)-C(46)-C(48)-H(58)   | 1.961     |
|  | C(44)-C(45)-C(47)-C(49)   | -0.8092   | H(64)-O(62)-Mn(69)-O(68) | 161.2505  | C(44)-C(45)-C(47)-C(49)   | -1.0377   |
|  | C(44)-C(45)-C(47)-H(57)   | 179.967   | C(46)-C(48)-C(49)-C(47)  | 0.6589    | C(44)-C(45)-C(47)-H(57)   | 179.9128  |
|  | H(56)-C(45)-C(47)-C(49)   | 179.0034  | C(46)-C(48)-C(49)-H(59)  | -179.7056 | H(56)-C(45)-C(47)-C(49)   | 178.8246  |
|  | H(56)-C(45)-C(47)-H(57)   | -0.2205   | H(58)-C(48)-C(49)-C(47)  | -179.6818 | H(56)-C(45)-C(47)-H(57)   | -0.2249   |
|  | N(43)-C(44)-C(46)-C(48)   | -172.0924 | H(58)-C(48)-C(49)-H(59)  | -0.0462   | N(43)-C(44)-C(46)-C(48)   | -171.0409 |
|  | N(43)-C(44)-C(46)-O(65)   | 4.7278    | C(45)-C(47)-C(49)-C(48)  | 0.2481    | N(43)-C(44)-C(46)-O(65)   | 4.3786    |
|  | C(45)-C(44)-C(46)-C(48)   | 1.4785    | C(45)-C(47)-C(49)-H(59)  | -179.3886 | C(45)-C(44)-C(46)-C(48)   | 2.0565    |
|  | C(45)-C(44)-C(46)-O(65)   | 178.2987  | H(57)-C(47)-C(49)-C(48)  | 179.6458  | C(45)-C(44)-C(46)-O(65)   | 177.476   |
|  | N(43)-C(44)-C(45)-C(47)   | 173.7701  | H(57)-C(47)-C(49)-H(59)  | 0.0091    | N(43)-C(44)-C(45)-C(47)   | 173.1228  |
|  | N(43)-C(44)-C(45)-H(56)   | -6.0423   | C(44)-C(46)-O(65)-Mn(69) | 38.209    | N(43)-C(44)-C(45)-H(56)   | -6.7394   |
|  | C(46)-C(44)-C(45)-C(47)   | -0.1916   | C(48)-C(46)-O(65)-Mn(69) | -144.8569 | C(46)-C(44)-C(45)-C(47)   | -0.2991   |
|  | C(46)-C(44)-C(45)-H(56)   | 179.996   | C(44)-C(46)-C(48)-C(49)  | -1.2279   | C(46)-C(44)-C(45)-H(56)   | 179.8387  |
|  | N(42)-N(43)-C(44)-C(45)   | 163.3135  | C(44)-C(46)-C(48)-H(58)  | 179.1124  | N(42)-N(43)-C(44)-C(45)   | 161.4045  |
|  | N(42)-N(43)-C(44)-C(46)   | -22.9883  | O(65)-C(46)-C(48)-C(49)  | -178.2602 | N(42)-N(43)-C(44)-C(46)   | -25.4008  |
|  | C(37)-N(42)-Cr(67)-N(11)  | -177.5062 | O(65)-C(46)-C(48)-H(58)  | 2.0801    | C(37)-N(42)-Fe(67)-N(11)  | 137.1828  |
|  | C(37)-N(42)-Cr(67)-O(19)  | 120.7176  | C(44)-C(45)-C(47)-C(49)  | -0.6114   | C(37)-N(42)-Fe(67)-O(19)  | 106.07    |
|  | C(37)-N(42)-Cr(67)-O(62)  | 28.6698   | C(44)-C(45)-C(47)-H(57)  | 179.993   | C(37)-N(42)-Fe(67)-O(62)  | 3.2485    |
|  | C(37)-N(42)-Cr(67)-O(65)  | -149.2656 | H(56)-C(45)-C(47)-C(49)  | 179.1701  | C(37)-N(42)-Fe(67)-O(65)  | -142.6707 |
|  | C(37)-N(42)-Cr(67)-Cl(66) | -59.9175  | H(56)-C(45)-C(47)-H(57)  | -0.2255   | C(37)-N(42)-Fe(67)-Cl(66) | -67.9442  |
|  | N(43)-N(42)-Cr(67)-N(11)  | 5.3558    | N(43)-C(44)-C(46)-C(48)  | -172.956  | N(43)-N(42)-Fe(67)-N(11)  | -43.2648  |
|  | N(43)-N(42)-Cr(67)-O(19)  | -56.4204  | N(43)-C(44)-C(46)-O(65)  | 3.9132    | N(43)-N(42)-Fe(67)-O(19)  | -74.3775  |
|  | N(43)-N(42)-Cr(67)-O(62)  | -148.4682 | C(45)-C(44)-C(46)-C(48)  | 0.8571    | N(43)-N(42)-Fe(67)-O(62)  | -177.199  |
|  | N(43)-N(42)-Cr(67)-O(65)  | 33.5964   | C(45)-C(44)-C(46)-O(65)  | 177.7263  | N(43)-N(42)-Fe(67)-O(65)  | 36.8817   |
|  | N(43)-N(42)-Cr(67)-Cl(66) | 122.9445  | N(43)-C(44)-C(45)-C(47)  | 174.2205  | N(43)-N(42)-Fe(67)-Cl(66) | 111.6082  |
|  | C(37)-N(42)-N(43)-C(44)   | 177.9821  | N(43)-C(44)-C(45)-H(56)  | -5.5608   | C(37)-N(42)-N(43)-C(44)   | 175.4884  |
|  | Cr(67)-N(42)-N(43)-C(44)  | -4.7794   | C(46)-C(44)-C(45)-C(47)  | 0.0399    | Fe(67)-N(42)-N(43)-C(44)  | -4.074    |
|  | C(35)-C(40)-C(41)-C(39)   | -0.8275   | C(46)-C(44)-C(45)-H(56)  | -179.7414 | C(35)-C(40)-C(41)-C(39)   | 0.4728    |
|  | C(35)-C(40)-C(41)-H(55)   | 179.9295  | N(42)-N(43)-C(44)-C(45)  | 163.1811  | C(35)-C(40)-C(41)-H(55)   | 179.8028  |
|  | H(54)-C(40)-C(41)-C(39)   | 179.1703  | N(42)-N(43)-C(44)-C(46)  | -22.8943  | H(54)-C(40)-C(41)-C(39)   | -178.9698 |
|  | H(54)-C(40)-C(41)-H(55)   | -0.0727   | C(37)-N(42)-Mn(69)-N(11) | -151.38   | H(54)-C(40)-C(41)-H(55)   | 0.3602    |
|  | C(38)-C(39)-C(41)-C(40)   | 0.4984    | C(37)-N(42)-Mn(69)-O(19) | 120.9147  | C(38)-C(39)-C(41)-C(40)   | -0.3393   |

|  |                           |           |                          |           |                           |           |
|--|---------------------------|-----------|--------------------------|-----------|---------------------------|-----------|
|  | C(38)-C(39)-C(41)-H(55)   | 179.7442  | C(37)-N(42)-Mn(69)-O(62) | 29.7508   | C(38)-C(39)-C(41)-H(55)   | -179.6719 |
|  | H(53)-C(39)-C(41)-C(40)   | -178.5407 | C(37)-N(42)-Mn(69)-O(65) | -149.142  | H(53)-C(39)-C(41)-C(40)   | 178.9517  |
|  | H(53)-C(39)-C(41)-H(55)   | 0.7051    | C(37)-N(42)-Mn(69)-O(68) | -59.3946  | H(53)-C(39)-C(41)-H(55)   | -0.3809   |
|  | C(33)-C(38)-C(39)-C(41)   | 0.6376    | N(43)-N(42)-Mn(69)-N(11) | 31.5099   | C(33)-C(38)-C(39)-C(41)   | -0.4745   |
|  | C(33)-C(38)-C(39)-H(53)   | 179.6716  | N(43)-N(42)-Mn(69)-O(19) | -56.1954  | C(33)-C(38)-C(39)-H(53)   | -179.7617 |
|  | H(52)-C(38)-C(39)-C(41)   | -177.8601 | N(43)-N(42)-Mn(69)-O(62) | -147.3593 | H(52)-C(38)-C(39)-C(41)   | 178.4621  |
|  | H(52)-C(38)-C(39)-H(53)   | 1.1739    | N(43)-N(42)-Mn(69)-O(65) | 33.7479   | H(52)-C(38)-C(39)-H(53)   | -0.8252   |
|  | C(35)-C(37)-N(42)-N(43)   | -77.4729  | N(43)-N(42)-Mn(69)-O(68) | 123.4953  | C(35)-C(37)-N(42)-N(43)   | -67.0411  |
|  | C(35)-C(37)-N(42)-Cr(67)  | 105.311   | C(37)-N(42)-N(43)-C(44)  | 178.1364  | C(35)-C(37)-N(42)-Fe(67)  | 112.5174  |
|  | C(36)-C(37)-N(42)-N(43)   | 97.2088   | Mn(69)-N(42)-N(43)-C(44) | -4.6459   | C(36)-C(37)-N(42)-N(43)   | 111.3431  |
|  | C(36)-C(37)-N(42)-Cr(67)  | -80.0073  | C(35)-C(40)-C(41)-C(39)  | -1.0197   | C(36)-C(37)-N(42)-Fe(67)  | -69.0985  |
|  | C(34)-C(36)-C(37)-C(35)   | -5.2788   | C(35)-C(40)-C(41)-H(55)  | -179.8269 | C(34)-C(36)-C(37)-C(35)   | 0.1197    |
|  | C(34)-C(36)-C(37)-N(42)   | 179.9796  | H(54)-C(40)-C(41)-C(39)  | 177.9846  | C(34)-C(36)-C(37)-N(42)   | -178.284  |
|  | H(61)-C(36)-C(37)-C(35)   | 175.1038  | H(54)-C(40)-C(41)-H(55)  | -0.8226   | H(61)-C(36)-C(37)-C(35)   | 178.2827  |
|  | H(61)-C(36)-C(37)-N(42)   | 0.3621    | C(38)-C(39)-C(41)-C(40)  | 0.0676    | H(61)-C(36)-C(37)-N(42)   | -0.121    |
|  | C(33)-C(35)-C(40)-C(41)   | -0.006    | C(38)-C(39)-C(41)-H(55)  | 178.8793  | C(33)-C(35)-C(40)-C(41)   | 0.2365    |
|  | C(33)-C(35)-C(40)-H(54)   | 179.9963  | H(53)-C(39)-C(41)-C(40)  | -178.6568 | C(33)-C(35)-C(40)-H(54)   | 179.6672  |
|  | C(37)-C(35)-C(40)-C(41)   | 178.436   | H(53)-C(39)-C(41)-H(55)  | 0.1548    | C(37)-C(35)-C(40)-C(41)   | -178.4035 |
|  | C(37)-C(35)-C(40)-H(54)   | -1.5617   | C(33)-C(38)-C(39)-C(41)  | 0.964     | C(37)-C(35)-C(40)-H(54)   | 1.0273    |
|  | C(33)-C(35)-C(37)-C(36)   | 4.1977    | C(33)-C(38)-C(39)-H(53)  | 179.6818  | C(33)-C(35)-C(37)-C(36)   | 0.134     |
|  | C(33)-C(35)-C(37)-N(42)   | 178.8826  | H(52)-C(38)-C(39)-C(41)  | -177.6384 | C(33)-C(35)-C(37)-N(42)   | 178.5189  |
|  | C(40)-C(35)-C(37)-C(36)   | -174.239  | H(52)-C(38)-C(39)-H(53)  | 1.0794    | C(40)-C(35)-C(37)-C(36)   | 178.7686  |
|  | C(40)-C(35)-C(37)-N(42)   | 0.446     | C(35)-C(37)-N(42)-N(43)  | -80.5671  | C(40)-C(35)-C(37)-N(42)   | -2.8466   |
|  | C(32)-C(34)-C(36)-C(37)   | 1.7369    | C(35)-C(37)-N(42)-Mn(69) | 102.2461  | C(32)-C(34)-C(36)-C(37)   | 0.716     |
|  | C(32)-C(34)-C(36)-H(61)   | -178.64   | C(36)-C(37)-N(42)-N(43)  | 94.6662   | C(32)-C(34)-C(36)-H(61)   | -177.4807 |
|  | H(51)-C(34)-C(36)-C(37)   | -176.3496 | C(36)-C(37)-N(42)-Mn(69) | -82.5206  | H(51)-C(34)-C(36)-C(37)   | 179.0463  |
|  | H(51)-C(34)-C(36)-H(61)   | 3.2735    | C(34)-C(36)-C(37)-C(35)  | -6.3705   | H(51)-C(34)-C(36)-H(61)   | 0.8496    |
|  | C(32)-C(33)-C(35)-C(37)   | 0.4163    | C(34)-C(36)-C(37)-N(42)  | 178.3367  | C(32)-C(33)-C(35)-C(37)   | -1.1012   |
|  | C(32)-C(33)-C(35)-C(40)   | 178.8591  | H(61)-C(36)-C(37)-C(35)  | 174.5882  | C(32)-C(33)-C(35)-C(40)   | -179.7421 |
|  | C(38)-C(33)-C(35)-C(37)   | -177.3302 | H(61)-C(36)-C(37)-N(42)  | -0.7046   | C(38)-C(33)-C(35)-C(37)   | 177.6169  |
|  | C(38)-C(33)-C(35)-C(40)   | 1.1127    | C(33)-C(35)-C(40)-C(41)  | 0.9358    | C(38)-C(33)-C(35)-C(40)   | -1.024    |
|  | C(32)-C(33)-C(38)-C(39)   | -179.1291 | C(33)-C(35)-C(40)-H(54)  | -178.0501 | C(32)-C(33)-C(38)-C(39)   | 179.8451  |
|  | C(32)-C(33)-C(38)-H(52)   | -0.6967   | C(37)-C(35)-C(40)-C(41)  | 178.8852  | C(32)-C(33)-C(38)-H(52)   | 0.9588    |
|  | C(35)-C(33)-C(38)-C(39)   | -1.4479   | C(37)-C(35)-C(40)-H(54)  | -0.1007   | C(35)-C(33)-C(38)-C(39)   | 1.1653    |
|  | C(35)-C(33)-C(38)-H(52)   | 176.9846  | C(33)-C(35)-C(37)-C(36)  | 5.7681    | C(35)-C(33)-C(38)-H(52)   | -177.721  |
|  | C(33)-C(32)-O(50)-H(60)   | -10.8808  | C(33)-C(35)-C(37)-N(42)  | -178.9907 | C(33)-C(32)-O(50)-H(60)   | 7.932     |
|  | C(34)-C(32)-O(50)-H(60)   | 168.6986  | C(40)-C(35)-C(37)-C(36)  | -172.1743 | C(34)-C(32)-O(50)-H(60)   | -171.3489 |
|  | C(33)-C(32)-C(34)-C(36)   | 2.9373    | C(40)-C(35)-C(37)-N(42)  | 3.0669    | C(33)-C(32)-C(34)-C(36)   | -1.6881   |
|  | C(33)-C(32)-C(34)-H(51)   | -178.9974 | C(32)-C(34)-C(36)-C(37)  | 1.692     | C(33)-C(32)-C(34)-H(51)   | -179.999  |
|  | O(50)-C(32)-C(34)-C(36)   | -176.6588 | C(32)-C(34)-C(36)-H(61)  | -179.2518 | O(50)-C(32)-C(34)-C(36)   | 177.6228  |
|  | O(50)-C(32)-C(34)-H(51)   | 1.4066    | H(51)-C(34)-C(36)-C(37)  | -175.8943 | O(50)-C(32)-C(34)-H(51)   | -0.6882   |
|  | C(34)-C(32)-C(33)-C(38)   | 173.7428  | H(51)-C(34)-C(36)-H(61)  | 3.162     | C(34)-C(32)-C(33)-C(38)   | -176.7668 |
|  | C(34)-C(32)-C(33)-C(35)   | -3.9285   | C(32)-C(33)-C(35)-C(37)  | -0.4669   | C(34)-C(32)-C(33)-C(35)   | 1.9069    |
|  | O(50)-C(32)-C(33)-C(38)   | -6.6856   | C(32)-C(33)-C(35)-C(40)  | 177.4845  | O(50)-C(32)-C(33)-C(38)   | 3.9668    |
|  | O(50)-C(32)-C(33)-C(35)   | 175.6431  | C(38)-C(33)-C(35)-C(37)  | -177.8674 | O(50)-C(32)-C(33)-C(35)   | -177.3595 |
|  | C(15)-O(19)-Cr(67)-N(11)  | 41.4882   | C(38)-C(33)-C(35)-C(40)  | 0.084     | C(15)-O(19)-Fe(67)-N(11)  | 55.3659   |
|  | C(15)-O(19)-Cr(67)-N(42)  | -139.4626 | C(32)-C(33)-C(38)-C(39)  | -178.3554 | C(15)-O(19)-Fe(67)-N(42)  | -135.4071 |
|  | C(15)-O(19)-Cr(67)-O(62)  | -49.1639  | C(32)-C(33)-C(38)-H(52)  | 0.1866    | C(15)-O(19)-Fe(67)-O(62)  | -37.5249  |
|  | C(15)-O(19)-Cr(67)-O(65)  | 130.7051  | C(35)-C(33)-C(38)-C(39)  | -1.0287   | C(15)-O(19)-Fe(67)-O(65)  | 139.6553  |
|  | C(15)-O(19)-Cr(67)-Cl(66) | -159.8729 | C(35)-C(33)-C(38)-H(52)  | 177.5133  | C(15)-O(19)-Fe(67)-Cl(66) | -113.4997 |
|  | C(15)-C(17)-C(18)-C(16)   | -0.5076   | C(33)-C(32)-O(50)-H(60)  | -11.6098  | C(15)-C(17)-C(18)-C(16)   | -0.9821   |
|  | C(15)-C(17)-C(18)-H(29)   | 179.745   | C(34)-C(32)-O(50)-H(60)  | 168.2081  | C(15)-C(17)-C(18)-H(29)   | 179.584   |
|  | H(28)-C(17)-C(18)-C(16)   | 179.8473  | C(33)-C(32)-C(34)-C(36)  | 3.6728    | H(28)-C(17)-C(18)-C(16)   | 179.3389  |
|  | H(28)-C(17)-C(18)-H(29)   | 0.0998    | C(33)-C(32)-C(34)-H(51)  | -178.7678 | H(28)-C(17)-C(18)-H(29)   | -0.095    |

|  |  |                           |           |                          |           |                           |           |
|--|--|---------------------------|-----------|--------------------------|-----------|---------------------------|-----------|
|  |  | C(14)-C(16)-C(18)-C(17)   | -0.2736   | O(50)-C(32)-C(34)-C(36)  | -176.1523 | C(14)-C(16)-C(18)-C(17)   | -0.4563   |
|  |  | C(14)-C(16)-C(18)-H(29)   | 179.4746  | O(50)-C(32)-C(34)-H(51)  | 1.4071    | C(14)-C(16)-C(18)-H(29)   | 178.9794  |
|  |  | H(27)-C(16)-C(18)-C(17)   | -179.7015 | C(34)-C(32)-C(33)-C(38)  | 173.1421  | H(27)-C(16)-C(18)-C(17)   | -179.5869 |
|  |  | H(27)-C(16)-C(18)-H(29)   | 0.0467    | C(34)-C(32)-C(33)-C(35)  | -4.1734   | H(27)-C(16)-C(18)-H(29)   | -0.1512   |
|  |  | C(13)-C(15)-O(19)-Cr(67)  | -31.7568  | O(50)-C(32)-C(33)-C(38)  | -7.0433   | C(13)-C(15)-O(19)-Fe(67)  | -42.1835  |
|  |  | C(17)-C(15)-O(19)-Cr(67)  | 150.0641  | O(50)-C(32)-C(33)-C(35)  | 175.6411  | C(17)-C(15)-O(19)-Fe(67)  | 141.814   |
|  |  | C(13)-C(15)-C(17)-C(18)   | 1.0393    | C(15)-O(19)-Mn(69)-N(11) | 42.2092   | C(13)-C(15)-C(17)-C(18)   | 2.0553    |
|  |  | C(13)-C(15)-C(17)-H(28)   | -179.3153 | C(15)-O(19)-Mn(69)-N(42) | -139.2905 | C(13)-C(15)-C(17)-H(28)   | -178.2655 |
|  |  | O(19)-C(15)-C(17)-C(18)   | 179.2896  | C(15)-O(19)-Mn(69)-O(62) | -49.0744  | O(19)-C(15)-C(17)-C(18)   | 178.1234  |
|  |  | O(19)-C(15)-C(17)-H(28)   | -1.0649   | C(15)-O(19)-Mn(69)-O(65) | 131.1267  | O(19)-C(15)-C(17)-H(28)   | -2.1974   |
|  |  | C(13)-C(14)-C(16)-C(18)   | 0.5433    | C(15)-O(19)-Mn(69)-O(68) | 90.5985   | C(13)-C(14)-C(16)-C(18)   | 0.8767    |
|  |  | C(13)-C(14)-C(16)-H(27)   | 179.9693  | C(15)-C(17)-C(18)-C(16)  | -0.597    | C(13)-C(14)-C(16)-H(27)   | -179.9955 |
|  |  | H(26)-C(14)-C(16)-C(18)   | -179.1628 | C(15)-C(17)-C(18)-H(29)  | 179.6849  | H(26)-C(14)-C(16)-C(18)   | -178.7894 |
|  |  | H(26)-C(14)-C(16)-H(27)   | 0.2633    | H(28)-C(17)-C(18)-C(16)  | 179.821   | H(26)-C(14)-C(16)-H(27)   | 0.3384    |
|  |  | N(12)-C(13)-C(15)-C(17)   | 172.5778  | H(28)-C(17)-C(18)-H(29)  | 0.1029    | N(12)-C(13)-C(15)-C(17)   | 170.5809  |
|  |  | N(12)-C(13)-C(15)-O(19)   | -5.5572   | C(14)-C(16)-C(18)-C(17)  | -0.2377   | N(12)-C(13)-C(15)-O(19)   | -5.3761   |
|  |  | C(14)-C(13)-C(15)-C(17)   | -0.7625   | C(14)-C(16)-C(18)-H(29)  | 179.4812  | C(14)-C(13)-C(15)-C(17)   | -1.626    |
|  |  | C(14)-C(13)-C(15)-O(19)   | -178.8975 | H(27)-C(16)-C(18)-C(17)  | -179.6763 | C(14)-C(13)-C(15)-O(19)   | -177.583  |
|  |  | N(12)-C(13)-C(14)-C(16)   | -173.775  | H(27)-C(16)-C(18)-H(29)  | 0.0427    | N(12)-C(13)-C(14)-C(16)   | -172.2618 |
|  |  | N(12)-C(13)-C(14)-H(26)   | 5.9308    | C(13)-C(15)-O(19)-Mn(69) | -32.9767  | N(12)-C(13)-C(14)-H(26)   | 7.4041    |
|  |  | C(15)-C(13)-C(14)-C(16)   | -0.0091   | C(17)-C(15)-O(19)-Mn(69) | 148.9383  | C(15)-C(13)-C(14)-C(16)   | 0.1974    |
|  |  | C(15)-C(13)-C(14)-H(26)   | 179.6967  | C(13)-C(15)-C(17)-C(18)  | 1.1005    | C(15)-C(13)-C(14)-H(26)   | 179.8633  |
|  |  | N(11)-N(12)-C(13)-C(14)   | -165.2797 | C(13)-C(15)-C(17)-H(28)  | -179.3171 | N(11)-N(12)-C(13)-C(14)   | -163.781  |
|  |  | N(11)-N(12)-C(13)-C(15)   | 21.2429   | O(19)-C(15)-C(17)-C(18)  | 179.2624  | N(11)-N(12)-C(13)-C(15)   | 23.9211   |
|  |  | C(6)-N(11)-Cr(67)-O(19)   | 151.3239  | O(19)-C(15)-C(17)-H(28)  | -1.1552   | C(6)-N(11)-Fe(67)-O(19)   | 146.1276  |
|  |  | C(6)-N(11)-Cr(67)-N(42)   | 89.5537   | C(13)-C(14)-C(16)-C(18)  | 0.5881    | C(6)-N(11)-Fe(67)-N(42)   | 116.1751  |
|  |  | C(6)-N(11)-Cr(67)-O(62)   | -116.6237 | C(13)-C(14)-C(16)-H(27)  | -179.9752 | C(6)-N(11)-Fe(67)-O(62)   | -108.8562 |
|  |  | C(6)-N(11)-Cr(67)-O(65)   | 61.3103   | H(26)-C(14)-C(16)-C(18)  | -179.2114 | C(6)-N(11)-Fe(67)-O(65)   | 35.1052   |
|  |  | C(6)-N(11)-Cr(67)-Cl(66)  | -28.0126  | H(26)-C(14)-C(16)-H(27)  | 0.2252    | C(6)-N(11)-Fe(67)-Cl(66)  | -37.1442  |
|  |  | N(12)-N(11)-Cr(67)-O(19)  | -29.0558  | N(12)-C(13)-C(15)-C(17)  | 172.8769  | N(12)-N(11)-Fe(67)-O(19)  | -40.9114  |
|  |  | N(12)-N(11)-Cr(67)-N(42)  | -90.826   | N(12)-C(13)-C(15)-O(19)  | -5.1624   | N(12)-N(11)-Fe(67)-N(42)  | -70.8639  |
|  |  | N(12)-N(11)-Cr(67)-O(62)  | 62.9967   | C(14)-C(13)-C(15)-C(17)  | -0.7434   | N(12)-N(11)-Fe(67)-O(62)  | 64.1048   |
|  |  | N(12)-N(11)-Cr(67)-O(65)  | -119.0694 | C(14)-C(13)-C(15)-O(19)  | -178.7826 | N(12)-N(11)-Fe(67)-O(65)  | -151.9338 |
|  |  | N(12)-N(11)-Cr(67)-Cl(66) | 151.6077  | N(12)-C(13)-C(14)-C(16)  | -174.1074 | N(12)-N(11)-Fe(67)-Cl(66) | 135.8167  |
|  |  | C(6)-N(11)-N(12)-C(13)    | -176.5864 | N(12)-C(13)-C(14)-H(26)  | 5.692     | C(6)-N(11)-N(12)-C(13)    | -178.0729 |
|  |  | Cr(67)-N(11)-N(12)-C(13)  | 3.7793    | C(15)-C(13)-C(14)-C(16)  | -0.0806   | Fe(67)-N(11)-N(12)-C(13)  | 8.7765    |
|  |  | C(4)-C(9)-C(10)-C(8)      | 0.6683    | C(15)-C(13)-C(14)-H(26)  | 179.7188  | C(4)-C(9)-C(10)-C(8)      | -0.3022   |
|  |  | C(4)-C(9)-C(10)-H(25)     | 179.8748  | N(11)-N(12)-C(13)-C(14)  | -163.6025 | C(4)-C(9)-C(10)-H(25)     | -179.375  |
|  |  | H(24)-C(9)-C(10)-C(8)     | -178.7011 | N(11)-N(12)-C(13)-C(15)  | 22.6479   | H(24)-C(9)-C(10)-C(8)     | 178.574   |
|  |  | H(24)-C(9)-C(10)-H(25)    | 0.5054    | C(6)-N(11)-Mn(69)-O(19)  | 147.4326  | H(24)-C(9)-C(10)-H(25)    | -0.4988   |
|  |  | C(7)-C(8)-C(10)-C(9)      | -0.0365   | C(6)-N(11)-Mn(69)-N(42)  | 59.7385   | C(7)-C(8)-C(10)-C(9)      | 0.5563    |
|  |  | C(7)-C(8)-C(10)-H(25)     | -179.2458 | C(6)-N(11)-Mn(69)-O(62)  | -121.3926 | C(7)-C(8)-C(10)-H(25)     | 179.6324  |
|  |  | H(23)-C(8)-C(10)-C(9)     | 178.8861  | C(6)-N(11)-Mn(69)-O(65)  | 57.5001   | H(23)-C(8)-C(10)-C(9)     | -178.6673 |
|  |  | H(23)-C(8)-C(10)-H(25)    | -0.3232   | C(6)-N(11)-Mn(69)-O(68)  | -32.2651  | H(23)-C(8)-C(10)-H(25)    | 0.4088    |
|  |  | C(2)-C(7)-C(8)-C(10)      | -0.719    | N(12)-N(11)-Mn(69)-O(19) | -28.6529  | C(2)-C(7)-C(8)-C(10)      | 0.3543    |
|  |  | C(2)-C(7)-C(8)-H(23)      | -179.6362 | N(12)-N(11)-Mn(69)-N(42) | -116.347  | C(2)-C(7)-C(8)-H(23)      | 179.5737  |
|  |  | H(22)-C(7)-C(8)-C(10)     | 177.8283  | N(12)-N(11)-Mn(69)-O(62) | 62.522    | H(22)-C(7)-C(8)-C(10)     | -178.167  |
|  |  | H(22)-C(7)-C(8)-H(23)     | -1.0889   | N(12)-N(11)-Mn(69)-O(65) | -118.5853 | H(22)-C(7)-C(8)-H(23)     | 1.0524    |
|  |  | C(4)-C(6)-N(11)-N(12)     | -103.0673 | N(12)-N(11)-Mn(69)-O(68) | 151.6495  | C(4)-C(6)-N(11)-N(12)     | 74.0072   |
|  |  | C(4)-C(6)-N(11)-Cr(67)    | 76.5692   | C(6)-N(11)-N(12)-C(13)   | -174.027  | C(4)-C(6)-N(11)-Fe(67)    | -112.8034 |
|  |  | C(5)-C(6)-N(11)-N(12)     | 81.6119   | Mn(69)-N(11)-N(12)-C(13) | 2.1059    | C(5)-C(6)-N(11)-N(12)     | -106.0483 |
|  |  | C(5)-C(6)-N(11)-Cr(67)    | -98.7516  | C(4)-C(9)-C(10)-C(8)     | 0.1177    | C(5)-C(6)-N(11)-Fe(67)    | 67.1411   |
|  |  | C(3)-C(5)-C(6)-C(4)       | 5.6564    | C(4)-C(9)-C(10)-H(25)    | -179.8231 | C(3)-C(5)-C(6)-C(4)       | -0.5372   |
|  |  | C(3)-C(5)-C(6)-N(11)      | -178.9728 | H(24)-C(9)-C(10)-C(8)    | 178.8423  | C(3)-C(5)-C(6)-N(11)      | 179.5179  |



|  |                       |           |                        |           |                       |           |
|--|-----------------------|-----------|------------------------|-----------|-----------------------|-----------|
|  | H(31)-C(5)-C(6)-C(4)  | -176.8391 | H(24)-C(9)-C(10)-H(25) | -1.0984   | H(31)-C(5)-C(6)-C(4)  | -178.5665 |
|  | H(31)-C(5)-C(6)-N(11) | -1.4684   | C(7)-C(8)-C(10)-C(9)   | -1.4078   | H(31)-C(5)-C(6)-N(11) | 1.4887    |
|  | C(2)-C(4)-C(9)-C(10)  | -0.5351   | C(7)-C(8)-C(10)-H(25)  | 178.5332  | C(2)-C(4)-C(9)-C(10)  | -0.9145   |
|  | C(2)-C(4)-C(9)-H(24)  | 178.8242  | H(23)-C(8)-C(10)-C(9)  | 178.3525  | C(2)-C(4)-C(9)-H(24)  | -179.77   |
|  | C(6)-C(4)-C(9)-C(10)  | -178.0879 | H(23)-C(8)-C(10)-H(25) | -1.7065   | C(6)-C(4)-C(9)-C(10)  | 177.174   |
|  | C(6)-C(4)-C(9)-H(24)  | 1.2714    | C(2)-C(7)-C(8)-C(10)   | 0.0707    | C(6)-C(4)-C(9)-H(24)  | -1.6815   |
|  | C(2)-C(4)-C(6)-C(5)   | -4.8409   | C(2)-C(7)-C(8)-H(23)   | -179.6884 | C(2)-C(4)-C(6)-C(5)   | -0.4734   |
|  | C(2)-C(4)-C(6)-N(11)  | 179.8424  | H(22)-C(7)-C(8)-C(10)  | 178.5186  | C(2)-C(4)-C(6)-N(11)  | 179.471   |
|  | C(9)-C(4)-C(6)-C(5)   | 172.7057  | H(22)-C(7)-C(8)-H(23)  | -1.2405   | C(9)-C(4)-C(6)-C(5)   | -178.5573 |
|  | C(9)-C(4)-C(6)-N(11)  | -2.6111   | C(4)-C(6)-N(11)-N(12)  | 60.4752   | C(9)-C(4)-C(6)-N(11)  | 1.3871    |
|  | C(1)-C(3)-C(5)-C(6)   | -1.5966   | C(4)-C(6)-N(11)-Mn(69) | -115.7565 | C(1)-C(3)-C(5)-C(6)   | -0.1539   |
|  | C(1)-C(3)-C(5)-H(31)  | -179.1285 | C(5)-C(6)-N(11)-N(12)  | -118.8517 | C(1)-C(3)-C(5)-H(31)  | 177.9038  |
|  | H(21)-C(3)-C(5)-C(6)  | 176.0112  | C(5)-C(6)-N(11)-Mn(69) | 64.9166   | H(21)-C(3)-C(5)-C(6)  | -178.4372 |
|  | H(21)-C(3)-C(5)-H(31) | -1.5207   | C(3)-C(5)-C(6)-C(4)    | -1.1406   | H(21)-C(3)-C(5)-H(31) | -0.3795   |
|  | C(1)-C(2)-C(4)-C(6)   | -0.033    | C(3)-C(5)-C(6)-N(11)   | 178.1973  | C(1)-C(2)-C(4)-C(6)   | 2.0271    |
|  | C(1)-C(2)-C(4)-C(9)   | -177.5853 | H(31)-C(5)-C(6)-C(4)   | 178.3491  | C(1)-C(2)-C(4)-C(9)   | -179.8854 |
|  | C(7)-C(2)-C(4)-C(6)   | 177.3433  | H(31)-C(5)-C(6)-N(11)  | -2.313    | C(7)-C(2)-C(4)-C(6)   | -176.3021 |
|  | C(7)-C(2)-C(4)-C(9)   | -0.209    | C(2)-C(4)-C(9)-C(10)   | 2.605     | C(7)-C(2)-C(4)-C(9)   | 1.7854    |
|  | C(1)-C(2)-C(7)-C(8)   | 178.1368  | C(2)-C(4)-C(9)-H(24)   | -176.0957 | C(1)-C(2)-C(7)-C(8)   | -179.824  |
|  | C(1)-C(2)-C(7)-H(22)  | -0.3478   | C(6)-C(4)-C(9)-C(10)   | -177.214  | C(1)-C(2)-C(7)-H(22)  | -1.3687   |
|  | C(4)-C(2)-C(7)-C(8)   | 0.8372    | C(6)-C(4)-C(9)-H(24)   | 4.0853    | C(4)-C(2)-C(7)-C(8)   | -1.5463   |
|  | C(4)-C(2)-C(7)-H(22)  | -177.6473 | C(2)-C(4)-C(6)-C(5)    | 2.6685    | C(4)-C(2)-C(7)-H(22)  | 176.909   |
|  | C(2)-C(1)-O(20)-H(30) | 11.1298   | C(2)-C(4)-C(6)-N(11)   | -176.6559 | C(2)-C(1)-O(20)-H(30) | -9.3173   |
|  | C(3)-C(1)-O(20)-H(30) | -168.5605 | C(9)-C(4)-C(6)-C(5)    | -177.5132 | C(3)-C(1)-O(20)-H(30) | 169.6659  |
|  | C(2)-C(1)-C(3)-C(5)   | -3.3265   | C(9)-C(4)-C(6)-N(11)   | 3.1624    | C(2)-C(1)-C(3)-C(5)   | 1.7274    |
|  | C(2)-C(1)-C(3)-H(21)  | 179.0922  | C(1)-C(3)-C(5)-C(6)    | 0.2695    | C(2)-C(1)-C(3)-H(21)  | 179.9915  |
|  | O(20)-C(1)-C(3)-C(5)  | 176.376   | C(1)-C(3)-C(5)-H(31)   | -179.2282 | O(20)-C(1)-C(3)-C(5)  | -177.2964 |
|  | O(20)-C(1)-C(3)-H(21) | -1.2053   | H(21)-C(3)-C(5)-C(6)   | 179.2022  | O(20)-C(1)-C(3)-H(21) | 0.9676    |
|  | C(3)-C(1)-C(2)-C(7)   | -173.2364 | H(21)-C(3)-C(5)-H(31)  | -0.2956   | C(3)-C(1)-C(2)-C(7)   | 175.5778  |
|  | C(3)-C(1)-C(2)-C(4)   | 4.051     | C(1)-C(2)-C(4)-C(6)    | -3.1387   | C(3)-C(1)-C(2)-C(4)   | -2.6918   |
|  | O(20)-C(1)-C(2)-C(7)  | 7.079     | C(1)-C(2)-C(4)-C(9)    | 177.0419  | O(20)-C(1)-C(2)-C(7)  | -5.4587   |
|  | O(20)-C(1)-C(2)-C(4)  | -175.6336 | C(7)-C(2)-C(4)-C(6)    | 175.9549  | O(20)-C(1)-C(2)-C(4)  | 176.2717  |
|  |                       |           | C(7)-C(2)-C(4)-C(9)    | -3.8645   |                       |           |
|  |                       |           | C(1)-C(2)-C(7)-C(8)    | -178.3138 |                       |           |
|  |                       |           | C(1)-C(2)-C(7)-H(22)   | 3.3085    |                       |           |
|  |                       |           | C(4)-C(2)-C(7)-C(8)    | 2.6189    |                       |           |
|  |                       |           | C(4)-C(2)-C(7)-H(22)   | -175.7588 |                       |           |
|  |                       |           | C(2)-C(1)-O(20)-H(30)  | 8.7846    |                       |           |
|  |                       |           | C(3)-C(1)-O(20)-H(30)  | -169.7535 |                       |           |
|  |                       |           | C(2)-C(1)-C(3)-C(5)    | -0.753    |                       |           |
|  |                       |           | C(2)-C(1)-C(3)-H(21)   | -179.6737 |                       |           |
|  |                       |           | O(20)-C(1)-C(3)-C(5)   | 177.8446  |                       |           |
|  |                       |           | O(20)-C(1)-C(3)-H(21)  | -1.0761   |                       |           |
|  |                       |           | C(3)-C(1)-C(2)-C(7)    | -176.8059 |                       |           |
|  |                       |           | C(3)-C(1)-C(2)-C(4)    | 2.2569    |                       |           |
|  |                       |           | O(20)-C(1)-C(2)-C(7)   | 4.6847    |                       |           |
|  |                       |           | O(20)-C(1)-C(2)-C(4)   | -176.2525 |                       |           |

**Table (S4):** Summary of Natural Population Analysis:

| Atom      | No | Natural Charge | Natural Population |          |         |           |
|-----------|----|----------------|--------------------|----------|---------|-----------|
|           |    |                | Core               | Valence  | Rydberg | Total     |
| C         | 1  | 0.36179        | 1.99860            | 3.62338  | 0.01624 | 5.63821   |
| C         | 2  | -0.09554       | 1.99880            | 4.08392  | 0.01283 | 6.09554   |
| C         | 3  | -0.28405       | 1.99899            | 4.27248  | 0.01258 | 6.28405   |
| C         | 4  | -0.03854       | 1.99883            | 4.02707  | 0.01264 | 6.03854   |
| C         | 5  | -0.15823       | 1.99899            | 4.14748  | 0.01176 | 6.15823   |
| C         | 6  | 0.09752        | 1.99878            | 3.88001  | 0.02369 | 5.90248   |
| C         | 7  | -0.18411       | 1.99904            | 4.17088  | 0.01420 | 6.18411   |
| C         | 8  | -0.19923       | 1.99908            | 4.18695  | 0.01320 | 6.19923   |
| C         | 9  | -0.18722       | 1.99903            | 4.17407  | 0.01412 | 6.18722   |
| C         | 10 | -0.19372       | 1.99907            | 4.18150  | 0.01315 | 6.19372   |
| N         | 11 | -0.23399       | 1.99942            | 5.21141  | 0.02317 | 7.23399   |
| N         | 12 | -0.25605       | 1.99940            | 5.23289  | 0.02375 | 7.25605   |
| C         | 13 | 0.03170        | 1.99882            | 3.94717  | 0.02231 | 5.96830   |
| C         | 14 | -0.19007       | 1.99903            | 4.17795  | 0.01309 | 6.19007   |
| C         | 15 | 0.34550        | 1.99861            | 3.63864  | 0.01726 | 5.65450   |
| C         | 16 | -0.22227       | 1.99908            | 4.21016  | 0.01303 | 6.22227   |
| C         | 17 | -0.24276       | 1.99900            | 4.23008  | 0.01368 | 6.24276   |
| C         | 18 | -0.17167       | 1.99908            | 4.15979  | 0.01280 | 6.17167   |
| O         | 19 | -0.69995       | 1.99979            | 6.69686  | 0.00331 | 8.69995   |
| O         | 20 | -0.69907       | 1.99978            | 6.69608  | 0.00321 | 8.69907   |
| H         | 21 | 0.22280        | 0.00000            | 0.77455  | 0.00265 | 0.77720   |
| H         | 22 | 0.22881        | 0.00000            | 0.76569  | 0.00550 | 0.77119   |
| H         | 23 | 0.22475        | 0.00000            | 0.77302  | 0.00224 | 0.77525   |
| H         | 24 | 0.21403        | 0.00000            | 0.78473  | 0.00124 | 0.78597   |
| H         | 25 | 0.22777        | 0.00000            | 0.76909  | 0.00314 | 0.77223   |
| H         | 26 | 0.21378        | 0.00000            | 0.78501  | 0.00121 | 0.78622   |
| H         | 27 | 0.22925        | 0.00000            | 0.76700  | 0.00376 | 0.77075   |
| H         | 28 | 0.21481        | 0.00000            | 0.78333  | 0.00186 | 0.78519   |
| H         | 29 | 0.22815        | 0.00000            | 0.76960  | 0.00225 | 0.77185   |
| H         | 30 | 0.21879        | 0.00000            | 0.78010  | 0.00111 | 0.78121   |
| H         | 31 | 0.49594        | 0.00000            | 0.50317  | 0.00089 | 0.50406   |
| H         | 32 | 0.50109        | 0.00000            | 0.49513  | 0.00378 | 0.49891   |
| =====     |    |                |                    |          |         |           |
| * Total * |    | 0.00000        | 39.98121           | 97.69917 | 0.31961 | 138.00000 |

Table (S5): NBO data of the Ligand:

| Donor NBO (i) |          | Acceptor NBO (j) |           | kcal/mol | a.u. | a.u.  |
|---------------|----------|------------------|-----------|----------|------|-------|
| within unit 1 |          |                  |           |          |      |       |
| 1. BD ( 1) C  | 1 - C 2  | / 86. RY* ( 1) C | 3         | 1.19     | 1.93 | 0.043 |
| 1. BD ( 1) C  | 1 - C 2  | / 94. RY* ( 1) C | 4         | 1.16     | 2.27 | 0.046 |
| 1. BD ( 1) C  | 1 - C 2  | /118. RY* ( 1) C | 7         | 1.30     | 1.87 | 0.044 |
| 1. BD ( 1) C  | 1 - C 2  | /255. BD* ( 1) C | 1 - C 3   | 3.71     | 1.27 | 0.061 |
| 1. BD ( 1) C  | 1 - C 2  | /258. BD* ( 1) C | 2 - C 4   | 3.61     | 1.29 | 0.061 |
| 1. BD ( 1) C  | 1 - C 2  | /260. BD* ( 1) C | 2 - C 7   | 1.71     | 1.11 | 0.039 |
| 1. BD ( 1) C  | 1 - C 2  | /262. BD* ( 1) C | 3 - H 21  | 2.89     | 1.09 | 0.050 |
| 1. BD ( 1) C  | 1 - C 2  | /264. BD* ( 1) C | 4 - C 9   | 3.96     | 1.11 | 0.059 |
| 1. BD ( 1) C  | 1 - C 2  | /269. BD* ( 1) C | 7 - C 8   | 1.27     | 1.31 | 0.037 |
| 1. BD ( 1) C  | 1 - C 2  | /296. BD* ( 1) O | 20 - H 31 | 1.60     | 0.96 | 0.035 |
| 2. BD ( 1) C  | 1 - C 3  | / 79. RY* ( 2) C | 2         | 1.83     | 2.23 | 0.057 |
| 2. BD ( 1) C  | 1 - C 3  | /103. RY* ( 2) C | 5         | 0.99     | 2.00 | 0.040 |
| 2. BD ( 1) C  | 1 - C 3  | /254. BD* ( 1) C | 1 - C 2   | 4.09     | 1.20 | 0.063 |
| 2. BD ( 1) C  | 1 - C 3  | /260. BD* ( 1) C | 2 - C 7   | 2.43     | 1.21 | 0.049 |
| 2. BD ( 1) C  | 1 - C 3  | /261. BD* ( 1) C | 3 - C 5   | 2.48     | 1.22 | 0.049 |
| 2. BD ( 1) C  | 1 - C 3  | /262. BD* ( 1) C | 3 - H 21  | 1.73     | 1.19 | 0.041 |
| 2. BD ( 1) C  | 1 - C 3  | /267. BD* ( 1) C | 5 - H 22  | 1.26     | 1.20 | 0.035 |
| 3. BD ( 2) C  | 1 - C 3  | / 81. RY* ( 4) C | 2         | 0.80     | 0.87 | 0.025 |
| 3. BD ( 2) C  | 1 - C 3  | /105. RY* ( 4) C | 5         | 0.94     | 0.80 | 0.026 |
| 3. BD ( 2) C  | 1 - C 3  | /222. RY* ( 1) O | 20        | 0.74     | 1.13 | 0.028 |
| 3. BD ( 2) C  | 1 - C 3  | /256. BD* ( 2) C | 1 - C 3   | 0.99     | 0.31 | 0.016 |
| 3. BD ( 2) C  | 1 - C 3  | /259. BD* ( 2) C | 2 - C 4   | 11.24    | 0.32 | 0.056 |
| 3. BD ( 2) C  | 1 - C 3  | /266. BD* ( 2) C | 5 - C 6   | 15.57    | 0.32 | 0.063 |
| 4. BD ( 1) C  | 1 - O 20 | / 70. RY* ( 1) C | 1         | 0.61     | 2.03 | 0.031 |
| 4. BD ( 1) C  | 1 - O 20 | / 79. RY* ( 2) C | 2         | 0.67     | 2.37 | 0.036 |
| 4. BD ( 1) C  | 1 - O 20 | /255. BD* ( 1) C | 1 - C 3   | 1.23     | 1.52 | 0.039 |
| 4. BD ( 1) C  | 1 - O 20 | /258. BD* ( 1) C | 2 - C 4   | 1.27     | 1.53 | 0.039 |
| 4. BD ( 1) C  | 1 - O 20 | /261. BD* ( 1) C | 3 - C 5   | 2.12     | 1.36 | 0.048 |
| 5. BD ( 1) C  | 2 - C 4  | / 70. RY* ( 1) C | 1         | 0.77     | 1.87 | 0.034 |
| 5. BD ( 1) C  | 2 - C 4  | /111. RY* ( 2) C | 6         | 0.96     | 2.09 | 0.040 |
| 5. BD ( 1) C  | 2 - C 4  | /118. RY* ( 1) C | 7         | 0.73     | 1.96 | 0.034 |
| 5. BD ( 1) C  | 2 - C 4  | /134. RY* ( 1) C | 9         | 0.80     | 1.96 | 0.036 |
| 5. BD ( 1) C  | 2 - C 4  | /254. BD* ( 1) C | 1 - C 2   | 3.63     | 1.18 | 0.058 |
| 5. BD ( 1) C  | 2 - C 4  | /257. BD* ( 1) C | 1 - O 20  | 2.71     | 1.01 | 0.047 |
| 5. BD ( 1) C  | 2 - C 4  | /260. BD* ( 1) C | 2 - C 7   | 4.04     | 1.19 | 0.062 |
| 5. BD ( 1) C  | 2 - C 4  | /263. BD* ( 1) C | 4 - C 6   | 3.78     | 1.19 | 0.060 |
| 5. BD ( 1) C  | 2 - C 4  | /264. BD* ( 1) C | 4 - C 9   | 3.59     | 1.19 | 0.059 |
| 5. BD ( 1) C  | 2 - C 4  | /268. BD* ( 1) C | 6 - N 11  | 2.67     | 1.12 | 0.049 |
| 5. BD ( 1) C  | 2 - C 4  | /271. BD* ( 1) C | 7 - H 23  | 1.36     | 1.19 | 0.036 |
| 5. BD ( 1) C  | 2 - C 4  | /276. BD* ( 1) C | 9 - H 25  | 1.37     | 1.19 | 0.036 |
| 6. BD ( 2) C  | 2 - C 4  | / 73. RY* ( 4) C | 1         | 0.67     | 0.81 | 0.023 |
| 6. BD ( 2) C  | 2 - C 4  | /113. RY* ( 4) C | 6         | 0.83     | 0.83 | 0.025 |
| 6. BD ( 2) C  | 2 - C 4  | /120. RY* ( 3) C | 7         | 1.17     | 0.77 | 0.029 |
| 6. BD ( 2) C  | 2 - C 4  | /136. RY* ( 3) C | 9         | 1.10     | 0.78 | 0.029 |
| 6. BD ( 2) C  | 2 - C 4  | /256. BD* ( 2) C | 1 - C 3   | 14.68    | 0.29 | 0.059 |
| 6. BD ( 2) C  | 2 - C 4  | /266. BD* ( 2) C | 5 - C 6   | 11.81    | 0.30 | 0.054 |
| 6. BD ( 2) C  | 2 - C 4  | /270. BD* ( 2) C | 7 - C 8   | 12.06    | 0.31 | 0.057 |
| 6. BD ( 2) C  | 2 - C 4  | /275. BD* ( 2) C | 9 - C 10  | 11.08    | 0.31 | 0.055 |
| 7. BD ( 1) C  | 2 - C 7  | / 70. RY* ( 1) C | 1         | 1.31     | 1.76 | 0.043 |
| 7. BD ( 1) C  | 2 - C 7  | / 94. RY* ( 1) C | 4         | 0.61     | 2.25 | 0.033 |
| 7. BD ( 1) C  | 2 - C 7  | / 95. RY* ( 2) C | 4         | 0.71     | 2.16 | 0.035 |
| 7. BD ( 1) C  | 2 - C 7  | /126. RY* ( 1) C | 8         | 0.70     | 1.82 | 0.032 |
| 7. BD ( 1) C  | 2 - C 7  | /127. RY* ( 2) C | 8         | 1.53     | 1.96 | 0.049 |
| 7. BD ( 1) C  | 2 - C 7  | /254. BD* ( 1) C | 1 - C 2   | 1.52     | 1.08 | 0.036 |
| 7. BD ( 1) C  | 2 - C 7  | /255. BD* ( 1) C | 1 - C 3   | 1.72     | 1.25 | 0.041 |
| 7. BD ( 1) C  | 2 - C 7  | /258. BD* ( 1) C | 2 - C 4   | 4.66     | 1.26 | 0.069 |
| 7. BD ( 1) C  | 2 - C 7  | /263. BD* ( 1) C | 4 - C 6   | 4.81     | 1.09 | 0.065 |
| 7. BD ( 1) C  | 2 - C 7  | /269. BD* ( 1) C | 7 - C 8   | 2.65     | 1.29 | 0.052 |
| 7. BD ( 1) C  | 2 - C 7  | /271. BD* ( 1) C | 7 - H 23  | 0.62     | 1.09 | 0.023 |
| 7. BD ( 1) C  | 2 - C 7  | /273. BD* ( 1) C | 8 - H 24  | 2.99     | 1.09 | 0.051 |
| 8. BD ( 1) C  | 3 - C 5  | / 71. RY* ( 2) C | 1         | 1.46     | 2.07 | 0.049 |
| 8. BD ( 1) C  | 3 - C 5  | /110. RY* ( 1) C | 6         | 0.91     | 1.62 | 0.034 |
| 8. BD ( 1) C  | 3 - C 5  | /111. RY* ( 2) C | 6         | 1.01     | 1.99 | 0.040 |

|                        |                            |       |      |       |
|------------------------|----------------------------|-------|------|-------|
| 8. BD ( 1) C 3 - C 5   | /255. BD* ( 1) C 1 - C 3   | 2.66  | 1.26 | 0.052 |
| 8. BD ( 1) C 3 - C 5   | /257. BD* ( 1) C 1 - O 20  | 5.41  | 0.92 | 0.063 |
| 8. BD ( 1) C 3 - C 5   | /262. BD* ( 1) C 3 - H 21  | 0.76  | 1.08 | 0.026 |
| 8. BD ( 1) C 3 - C 5   | /265. BD* ( 1) C 5 - C 6   | 2.76  | 1.27 | 0.053 |
| 8. BD ( 1) C 3 - C 5   | /267. BD* ( 1) C 5 - H 22  | 0.56  | 1.09 | 0.022 |
| 8. BD ( 1) C 3 - C 5   | /268. BD* ( 1) C 6 - N 11  | 5.26  | 1.03 | 0.066 |
| 9. BD ( 1) C 3 - H 21  | / 70. RY* ( 1) C 1         | 1.10  | 1.65 | 0.038 |
| 9. BD ( 1) C 3 - H 21  | / 74. RY* ( 5) C 1         | 0.60  | 9.46 | 0.068 |
| 9. BD ( 1) C 3 - H 21  | /102. RY* ( 1) C 5         | 1.02  | 1.76 | 0.038 |
| 9. BD ( 1) C 3 - H 21  | /254. BD* ( 1) C 1 - C 2   | 5.76  | 0.96 | 0.067 |
| 9. BD ( 1) C 3 - H 21  | /255. BD* ( 1) C 1 - C 3   | 1.19  | 1.14 | 0.033 |
| 9. BD ( 1) C 3 - H 21  | /257. BD* ( 1) C 1 - O 20  | 1.62  | 0.80 | 0.032 |
| 9. BD ( 1) C 3 - H 21  | /265. BD* ( 1) C 5 - C 6   | 2.74  | 1.14 | 0.050 |
| 10. BD ( 1) C 4 - C 6  | / 78. RY* ( 1) C 2         | 1.44  | 2.29 | 0.051 |
| 10. BD ( 1) C 4 - C 6  | /102. RY* ( 1) C 5         | 0.75  | 1.88 | 0.034 |
| 10. BD ( 1) C 4 - C 6  | /134. RY* ( 1) C 9         | 1.21  | 1.87 | 0.043 |
| 10. BD ( 1) C 4 - C 6  | /258. BD* ( 1) C 2 - C 4   | 3.50  | 1.27 | 0.060 |
| 10. BD ( 1) C 4 - C 6  | /260. BD* ( 1) C 2 - C 7   | 4.08  | 1.10 | 0.060 |
| 10. BD ( 1) C 4 - C 6  | /264. BD* ( 1) C 4 - C 9   | 1.82  | 1.10 | 0.040 |
| 10. BD ( 1) C 4 - C 6  | /265. BD* ( 1) C 5 - C 6   | 3.98  | 1.27 | 0.064 |
| 10. BD ( 1) C 4 - C 6  | /267. BD* ( 1) C 5 - H 22  | 2.87  | 1.09 | 0.050 |
| 10. BD ( 1) C 4 - C 6  | /268. BD* ( 1) C 6 - N 11  | 1.17  | 1.02 | 0.031 |
| 10. BD ( 1) C 4 - C 6  | /274. BD* ( 1) C 9 - C 10  | 1.28  | 1.30 | 0.037 |
| 10. BD ( 1) C 4 - C 6  | /278. BD* ( 1) N 11 - N 12 | 2.49  | 1.17 | 0.048 |
| 11. BD ( 1) C 4 - C 9  | / 78. RY* ( 1) C 2         | 0.78  | 2.27 | 0.038 |
| 11. BD ( 1) C 4 - C 9  | /110. RY* ( 1) C 6         | 1.00  | 1.61 | 0.036 |
| 11. BD ( 1) C 4 - C 9  | /142. RY* ( 1) C 10        | 0.74  | 1.81 | 0.033 |
| 11. BD ( 1) C 4 - C 9  | /143. RY* ( 2) C 10        | 1.48  | 1.98 | 0.049 |
| 11. BD ( 1) C 4 - C 9  | /254. BD* ( 1) C 1 - C 2   | 4.87  | 1.07 | 0.065 |
| 11. BD ( 1) C 4 - C 9  | /258. BD* ( 1) C 2 - C 4   | 4.36  | 1.26 | 0.066 |
| 11. BD ( 1) C 4 - C 9  | /263. BD* ( 1) C 4 - C 6   | 1.68  | 1.09 | 0.038 |
| 11. BD ( 1) C 4 - C 9  | /265. BD* ( 1) C 5 - C 6   | 1.95  | 1.26 | 0.044 |
| 11. BD ( 1) C 4 - C 9  | /274. BD* ( 1) C 9 - C 10  | 2.71  | 1.29 | 0.053 |
| 11. BD ( 1) C 4 - C 9  | /276. BD* ( 1) C 9 - H 25  | 0.67  | 1.09 | 0.024 |
| 11. BD ( 1) C 4 - C 9  | /277. BD* ( 1) C 10 - H 26 | 3.00  | 1.09 | 0.051 |
| 12. BD ( 1) C 5 - C 6  | / 87. RY* ( 2) C 3         | 1.33  | 2.04 | 0.047 |
| 12. BD ( 1) C 5 - C 6  | / 95. RY* ( 2) C 4         | 1.52  | 2.27 | 0.053 |
| 12. BD ( 1) C 5 - C 6  | /151. RY* ( 2) N 11        | 0.64  | 1.86 | 0.031 |
| 12. BD ( 1) C 5 - C 6  | /261. BD* ( 1) C 3 - C 5   | 2.42  | 1.21 | 0.048 |
| 12. BD ( 1) C 5 - C 6  | /262. BD* ( 1) C 3 - H 21  | 1.43  | 1.18 | 0.037 |
| 12. BD ( 1) C 5 - C 6  | /263. BD* ( 1) C 4 - C 6   | 4.33  | 1.20 | 0.065 |
| 12. BD ( 1) C 5 - C 6  | /264. BD* ( 1) C 4 - C 9   | 2.45  | 1.20 | 0.049 |
| 12. BD ( 1) C 5 - C 6  | /267. BD* ( 1) C 5 - H 22  | 1.66  | 1.19 | 0.040 |
| 12. BD ( 1) C 5 - C 6  | /268. BD* ( 1) C 6 - N 11  | 1.32  | 1.13 | 0.035 |
| 13. BD ( 2) C 5 - C 6  | / 88. RY* ( 3) C 3         | 0.95  | 0.78 | 0.026 |
| 13. BD ( 2) C 5 - C 6  | / 97. RY* ( 4) C 4         | 0.83  | 0.87 | 0.026 |
| 13. BD ( 2) C 5 - C 6  | /152. RY* ( 3) N 11        | 0.84  | 0.99 | 0.028 |
| 13. BD ( 2) C 5 - C 6  | /256. BD* ( 2) C 1 - C 3   | 11.78 | 0.30 | 0.053 |
| 13. BD ( 2) C 5 - C 6  | /259. BD* ( 2) C 2 - C 4   | 14.20 | 0.32 | 0.061 |
| 13. BD ( 2) C 5 - C 6  | /279. BD* ( 2) N 11 - N 12 | 19.46 | 0.23 | 0.060 |
| 14. BD ( 1) C 5 - H 22 | / 86. RY* ( 1) C 3         | 0.90  | 1.79 | 0.036 |
| 14. BD ( 1) C 5 - H 22 | /110. RY* ( 1) C 6         | 1.05  | 1.49 | 0.035 |
| 14. BD ( 1) C 5 - H 22 | /112. RY* ( 3) C 6         | 0.83  | 1.64 | 0.033 |
| 14. BD ( 1) C 5 - H 22 | /255. BD* ( 1) C 1 - C 3   | 2.84  | 1.13 | 0.051 |
| 14. BD ( 1) C 5 - H 22 | /262. BD* ( 1) C 3 - H 21  | 0.53  | 0.95 | 0.020 |
| 14. BD ( 1) C 5 - H 22 | /263. BD* ( 1) C 4 - C 6   | 6.18  | 0.97 | 0.069 |
| 14. BD ( 1) C 5 - H 22 | /265. BD* ( 1) C 5 - C 6   | 1.56  | 1.14 | 0.038 |
| 14. BD ( 1) C 5 - H 22 | /268. BD* ( 1) C 6 - N 11  | 1.27  | 0.90 | 0.030 |
| 15. BD ( 1) C 6 - N 11 | / 95. RY* ( 2) C 4         | 1.06  | 2.30 | 0.044 |
| 15. BD ( 1) C 6 - N 11 | /102. RY* ( 1) C 5         | 0.63  | 2.01 | 0.032 |
| 15. BD ( 1) C 6 - N 11 | /158. RY* ( 1) N 12        | 1.04  | 1.71 | 0.038 |
| 15. BD ( 1) C 6 - N 11 | /258. BD* ( 1) C 2 - C 4   | 1.45  | 1.40 | 0.040 |
| 15. BD ( 1) C 6 - N 11 | /261. BD* ( 1) C 3 - C 5   | 2.31  | 1.23 | 0.048 |
| 15. BD ( 1) C 6 - N 11 | /263. BD* ( 1) C 4 - C 6   | 0.93  | 1.22 | 0.030 |
| 15. BD ( 1) C 6 - N 11 | /265. BD* ( 1) C 5 - C 6   | 2.21  | 1.40 | 0.050 |
| 15. BD ( 1) C 6 - N 11 | /280. BD* ( 1) N 12 - C 13 | 4.62  | 1.15 | 0.065 |
| 16. BD ( 1) C 7 - C 8  | / 78. RY* ( 1) C 2         | 1.43  | 2.38 | 0.052 |
| 16. BD ( 1) C 7 - C 8  | / 79. RY* ( 2) C 2         | 0.63  | 2.21 | 0.033 |
| 16. BD ( 1) C 7 - C 8  | /142. RY* ( 1) C 10        | 0.91  | 1.92 | 0.037 |
| 16. BD ( 1) C 7 - C 8  | /143. RY* ( 2) C 10        | 0.82  | 2.08 | 0.037 |
| 16. BD ( 1) C 7 - C 8  | /254. BD* ( 1) C 1 - C 2   | 2.54  | 1.18 | 0.049 |

|                         |                            |       |      |       |
|-------------------------|----------------------------|-------|------|-------|
| 16. BD ( 1) C 7 - C 8   | /260. BD* ( 1) C 2 - C 7   | 2.84  | 1.19 | 0.052 |
| 16. BD ( 1) C 7 - C 8   | /271. BD* ( 1) C 7 - H 23  | 1.64  | 1.19 | 0.040 |
| 16. BD ( 1) C 7 - C 8   | /272. BD* ( 1) C 8 - C 10  | 2.36  | 1.21 | 0.048 |
| 16. BD ( 1) C 7 - C 8   | /273. BD* ( 1) C 8 - H 24  | 1.61  | 1.19 | 0.039 |
| 16. BD ( 1) C 7 - C 8   | /277. BD* ( 1) C 10 - H 26 | 1.57  | 1.19 | 0.039 |
| 17. BD ( 2) C 7 - C 8   | / 81. RY* ( 4) C 2         | 0.71  | 0.85 | 0.023 |
| 17. BD ( 2) C 7 - C 8   | /144. RY* ( 3) C 10        | 0.98  | 0.77 | 0.026 |
| 17. BD ( 2) C 7 - C 8   | /259. BD* ( 2) C 2 - C 4   | 12.56 | 0.31 | 0.058 |
| 17. BD ( 2) C 7 - C 8   | /275. BD* ( 2) C 9 - C 10  | 13.29 | 0.31 | 0.058 |
| 18. BD ( 1) C 7 - H 23  | / 78. RY* ( 1) C 2         | 1.53  | 2.15 | 0.051 |
| 18. BD ( 1) C 7 - H 23  | /126. RY* ( 1) C 8         | 1.24  | 1.69 | 0.041 |
| 18. BD ( 1) C 7 - H 23  | /258. BD* ( 1) C 2 - C 4   | 3.47  | 1.14 | 0.056 |
| 18. BD ( 1) C 7 - H 23  | /269. BD* ( 1) C 7 - C 8   | 1.50  | 1.16 | 0.037 |
| 18. BD ( 1) C 7 - H 23  | /272. BD* ( 1) C 8 - C 10  | 5.50  | 0.98 | 0.065 |
| 18. BD ( 1) C 7 - H 23  | /273. BD* ( 1) C 8 - H 24  | 1.00  | 0.96 | 0.028 |
| 19. BD ( 1) C 8 - C 10  | /119. RY* ( 2) C 7         | 1.89  | 1.76 | 0.052 |
| 19. BD ( 1) C 8 - C 10  | /135. RY* ( 2) C 9         | 1.90  | 1.73 | 0.051 |
| 19. BD ( 1) C 8 - C 10  | /269. BD* ( 1) C 7 - C 8   | 2.61  | 1.29 | 0.052 |
| 19. BD ( 1) C 8 - C 10  | /271. BD* ( 1) C 7 - H 23  | 3.20  | 1.09 | 0.053 |
| 19. BD ( 1) C 8 - C 10  | /273. BD* ( 1) C 8 - H 24  | 0.58  | 1.09 | 0.022 |
| 19. BD ( 1) C 8 - C 10  | /274. BD* ( 1) C 9 - C 10  | 2.59  | 1.29 | 0.052 |
| 19. BD ( 1) C 8 - C 10  | /276. BD* ( 1) C 9 - H 25  | 3.19  | 1.09 | 0.053 |
| 19. BD ( 1) C 8 - C 10  | /277. BD* ( 1) C 10 - H 26 | 0.57  | 1.09 | 0.022 |
| 20. BD ( 1) C 8 - H 24  | /118. RY* ( 1) C 7         | 1.48  | 1.73 | 0.045 |
| 20. BD ( 1) C 8 - H 24  | /142. RY* ( 1) C 10        | 1.21  | 1.69 | 0.040 |
| 20. BD ( 1) C 8 - H 24  | /260. BD* ( 1) C 2 - C 7   | 6.03  | 0.96 | 0.068 |
| 20. BD ( 1) C 8 - H 24  | /269. BD* ( 1) C 7 - C 8   | 1.40  | 1.16 | 0.036 |
| 20. BD ( 1) C 8 - H 24  | /271. BD* ( 1) C 7 - H 23  | 0.99  | 0.96 | 0.028 |
| 20. BD ( 1) C 8 - H 24  | /274. BD* ( 1) C 9 - C 10  | 2.76  | 1.16 | 0.051 |
| 21. BD ( 1) C 9 - C 10  | / 94. RY* ( 1) C 4         | 1.75  | 2.35 | 0.058 |
| 21. BD ( 1) C 9 - C 10  | /126. RY* ( 1) C 8         | 0.91  | 1.92 | 0.037 |
| 21. BD ( 1) C 9 - C 10  | /127. RY* ( 2) C 8         | 0.80  | 2.07 | 0.036 |
| 21. BD ( 1) C 9 - C 10  | /263. BD* ( 1) C 4 - C 6   | 2.55  | 1.19 | 0.049 |
| 21. BD ( 1) C 9 - C 10  | /264. BD* ( 1) C 4 - C 9   | 2.85  | 1.19 | 0.052 |
| 21. BD ( 1) C 9 - C 10  | /272. BD* ( 1) C 8 - C 10  | 2.38  | 1.21 | 0.048 |
| 21. BD ( 1) C 9 - C 10  | /273. BD* ( 1) C 8 - H 24  | 1.57  | 1.19 | 0.039 |
| 21. BD ( 1) C 9 - C 10  | /276. BD* ( 1) C 9 - H 25  | 1.66  | 1.19 | 0.040 |
| 21. BD ( 1) C 9 - C 10  | /277. BD* ( 1) C 10 - H 26 | 1.60  | 1.19 | 0.039 |
| 22. BD ( 2) C 9 - C 10  | / 97. RY* ( 4) C 4         | 0.68  | 0.86 | 0.023 |
| 22. BD ( 2) C 9 - C 10  | /128. RY* ( 3) C 8         | 0.98  | 0.77 | 0.026 |
| 22. BD ( 2) C 9 - C 10  | /259. BD* ( 2) C 2 - C 4   | 13.43 | 0.31 | 0.060 |
| 22. BD ( 2) C 9 - C 10  | /270. BD* ( 2) C 7 - C 8   | 13.24 | 0.31 | 0.058 |
| 23. BD ( 1) C 9 - H 25  | / 94. RY* ( 1) C 4         | 1.52  | 2.12 | 0.051 |
| 23. BD ( 1) C 9 - H 25  | /142. RY* ( 1) C 10        | 1.18  | 1.69 | 0.040 |
| 23. BD ( 1) C 9 - H 25  | /258. BD* ( 1) C 2 - C 4   | 3.48  | 1.13 | 0.056 |
| 23. BD ( 1) C 9 - H 25  | /272. BD* ( 1) C 8 - C 10  | 5.52  | 0.97 | 0.065 |
| 23. BD ( 1) C 9 - H 25  | /274. BD* ( 1) C 9 - C 10  | 1.51  | 1.16 | 0.037 |
| 23. BD ( 1) C 9 - H 25  | /277. BD* ( 1) C 10 - H 26 | 1.00  | 0.96 | 0.028 |
| 24. BD ( 1) C 10 - H 26 | /126. RY* ( 1) C 8         | 1.21  | 1.69 | 0.041 |
| 24. BD ( 1) C 10 - H 26 | /134. RY* ( 1) C 9         | 1.54  | 1.73 | 0.046 |
| 24. BD ( 1) C 10 - H 26 | /264. BD* ( 1) C 4 - C 9   | 6.09  | 0.96 | 0.068 |
| 24. BD ( 1) C 10 - H 26 | /269. BD* ( 1) C 7 - C 8   | 2.77  | 1.16 | 0.051 |
| 24. BD ( 1) C 10 - H 26 | /274. BD* ( 1) C 9 - C 10  | 1.41  | 1.16 | 0.036 |
| 24. BD ( 1) C 10 - H 26 | /276. BD* ( 1) C 9 - H 25  | 0.98  | 0.96 | 0.027 |
| 25. BD ( 1) N 11 - N 12 | /110. RY* ( 1) C 6         | 0.76  | 1.95 | 0.034 |
| 25. BD ( 1) N 11 - N 12 | /111. RY* ( 2) C 6         | 3.29  | 2.32 | 0.078 |
| 25. BD ( 1) N 11 - N 12 | /151. RY* ( 2) N 11        | 0.58  | 2.08 | 0.031 |
| 25. BD ( 1) N 11 - N 12 | /159. RY* ( 2) N 12        | 0.64  | 2.05 | 0.033 |
| 25. BD ( 1) N 11 - N 12 | /166. RY* ( 1) C 13        | 1.12  | 1.99 | 0.042 |
| 25. BD ( 1) N 11 - N 12 | /167. RY* ( 2) C 13        | 3.13  | 2.38 | 0.077 |
| 25. BD ( 1) N 11 - N 12 | /263. BD* ( 1) C 4 - C 6   | 1.58  | 1.43 | 0.043 |
| 25. BD ( 1) N 11 - N 12 | /282. BD* ( 1) C 13 - C 15 | 1.27  | 1.57 | 0.040 |
| 26. BD ( 2) N 11 - N 12 | /113. RY* ( 4) C 6         | 0.87  | 0.93 | 0.026 |
| 26. BD ( 2) N 11 - N 12 | /169. RY* ( 4) C 13        | 0.93  | 0.92 | 0.027 |
| 26. BD ( 2) N 11 - N 12 | /266. BD* ( 2) C 5 - C 6   | 8.50  | 0.40 | 0.055 |
| 26. BD ( 2) N 11 - N 12 | /283. BD* ( 2) C 13 - C 15 | 9.61  | 0.39 | 0.059 |
| 27. BD ( 1) N 12 - C 13 | /150. RY* ( 1) N 11        | 1.06  | 1.76 | 0.039 |
| 27. BD ( 1) N 12 - C 13 | /182. RY* ( 1) C 15        | 0.55  | 1.93 | 0.029 |
| 27. BD ( 1) N 12 - C 13 | /183. RY* ( 2) C 15        | 0.69  | 2.10 | 0.034 |
| 27. BD ( 1) N 12 - C 13 | /268. BD* ( 1) C 6 - N 11  | 4.71  | 1.16 | 0.066 |
| 27. BD ( 1) N 12 - C 13 | /281. BD* ( 1) C 13 - C 14 | 1.05  | 1.22 | 0.032 |

|                         |                            |       |      |       |
|-------------------------|----------------------------|-------|------|-------|
| 27. BD ( 1) N 12 - C 13 | /282. BD* ( 1) C 13 - C 15 | 1.79  | 1.37 | 0.044 |
| 27. BD ( 1) N 12 - C 13 | /284. BD* ( 1) C 14 - C 16 | 0.88  | 1.43 | 0.032 |
| 27. BD ( 1) N 12 - C 13 | /287. BD* ( 1) C 15 - C 17 | 2.51  | 1.21 | 0.049 |
| 28. BD ( 1) C 13 - C 14 | /159. RY* ( 2) N 12        | 0.51  | 1.72 | 0.027 |
| 28. BD ( 1) C 13 - C 14 | /183. RY* ( 2) C 15        | 1.34  | 1.97 | 0.046 |
| 28. BD ( 1) C 13 - C 14 | /190. RY* ( 1) C 16        | 0.75  | 1.89 | 0.034 |
| 28. BD ( 1) C 13 - C 14 | /191. RY* ( 2) C 16        | 1.56  | 1.98 | 0.050 |
| 28. BD ( 1) C 13 - C 14 | /282. BD* ( 1) C 13 - C 15 | 4.03  | 1.24 | 0.063 |
| 28. BD ( 1) C 13 - C 14 | /284. BD* ( 1) C 14 - C 16 | 2.65  | 1.29 | 0.052 |
| 28. BD ( 1) C 13 - C 14 | /288. BD* ( 1) C 15 - O 19 | 5.19  | 0.92 | 0.062 |
| 28. BD ( 1) C 13 - C 14 | /290. BD* ( 1) C 16 - H 28 | 3.14  | 1.09 | 0.052 |
| 29. BD ( 1) C 13 - C 15 | /158. RY* ( 1) N 12        | 0.61  | 1.71 | 0.029 |
| 29. BD ( 1) C 13 - C 15 | /174. RY* ( 1) C 14        | 0.73  | 2.04 | 0.035 |
| 29. BD ( 1) C 13 - C 15 | /198. RY* ( 1) C 17        | 1.38  | 2.03 | 0.047 |
| 29. BD ( 1) C 13 - C 15 | /278. BD* ( 1) N 11 - N 12 | 2.35  | 1.29 | 0.049 |
| 29. BD ( 1) C 13 - C 15 | /280. BD* ( 1) N 12 - C 13 | 2.36  | 1.14 | 0.046 |
| 29. BD ( 1) C 13 - C 15 | /281. BD* ( 1) C 13 - C 14 | 3.43  | 1.20 | 0.058 |
| 29. BD ( 1) C 13 - C 15 | /286. BD* ( 1) C 14 - H 27 | 1.26  | 1.21 | 0.035 |
| 29. BD ( 1) C 13 - C 15 | /287. BD* ( 1) C 15 - C 17 | 3.19  | 1.20 | 0.055 |
| 29. BD ( 1) C 13 - C 15 | /293. BD* ( 1) C 17 - H 29 | 1.27  | 1.20 | 0.035 |
| 30. BD ( 2) C 13 - C 15 | /160. RY* ( 3) N 12        | 0.87  | 0.99 | 0.028 |
| 30. BD ( 2) C 13 - C 15 | /177. RY* ( 4) C 14        | 1.02  | 0.80 | 0.027 |
| 30. BD ( 2) C 13 - C 15 | /200. RY* ( 3) C 17        | 0.98  | 0.79 | 0.027 |
| 30. BD ( 2) C 13 - C 15 | /214. RY* ( 1) O 19        | 0.72  | 1.14 | 0.028 |
| 30. BD ( 2) C 13 - C 15 | /279. BD* ( 2) N 11 - N 12 | 21.23 | 0.24 | 0.065 |
| 30. BD ( 2) C 13 - C 15 | /283. BD* ( 2) C 13 - C 15 | 1.23  | 0.31 | 0.018 |
| 30. BD ( 2) C 13 - C 15 | /285. BD* ( 2) C 14 - C 16 | 13.15 | 0.33 | 0.060 |
| 30. BD ( 2) C 13 - C 15 | /292. BD* ( 2) C 17 - C 18 | 10.67 | 0.32 | 0.054 |
| 31. BD ( 1) C 14 - C 16 | /166. RY* ( 1) C 13        | 1.38  | 1.76 | 0.044 |
| 31. BD ( 1) C 14 - C 16 | /168. RY* ( 3) C 13        | 0.58  | 1.77 | 0.029 |
| 31. BD ( 1) C 14 - C 16 | /206. RY* ( 1) C 18        | 0.99  | 1.94 | 0.039 |
| 31. BD ( 1) C 14 - C 16 | /207. RY* ( 2) C 18        | 0.83  | 2.06 | 0.037 |
| 31. BD ( 1) C 14 - C 16 | /280. BD* ( 1) N 12 - C 13 | 2.60  | 1.12 | 0.048 |
| 31. BD ( 1) C 14 - C 16 | /281. BD* ( 1) C 13 - C 14 | 2.35  | 1.18 | 0.047 |
| 31. BD ( 1) C 14 - C 16 | /286. BD* ( 1) C 14 - H 27 | 1.71  | 1.20 | 0.040 |
| 31. BD ( 1) C 14 - C 16 | /289. BD* ( 1) C 16 - C 18 | 2.39  | 1.21 | 0.048 |
| 31. BD ( 1) C 14 - C 16 | /290. BD* ( 1) C 16 - H 28 | 1.65  | 1.19 | 0.040 |
| 31. BD ( 1) C 14 - C 16 | /294. BD* ( 1) C 18 - H 30 | 1.58  | 1.19 | 0.039 |
| 32. BD ( 2) C 14 - C 16 | /169. RY* ( 4) C 13        | 0.69  | 0.82 | 0.022 |
| 32. BD ( 2) C 14 - C 16 | /208. RY* ( 3) C 18        | 0.97  | 0.77 | 0.026 |
| 32. BD ( 2) C 14 - C 16 | /283. BD* ( 2) C 13 - C 15 | 12.05 | 0.29 | 0.055 |
| 32. BD ( 2) C 14 - C 16 | /292. BD* ( 2) C 17 - C 18 | 14.92 | 0.31 | 0.060 |
| 33. BD ( 1) C 14 - H 27 | /166. RY* ( 1) C 13        | 0.81  | 1.53 | 0.031 |
| 33. BD ( 1) C 14 - H 27 | /190. RY* ( 1) C 16        | 1.33  | 1.76 | 0.043 |
| 33. BD ( 1) C 14 - H 27 | /280. BD* ( 1) N 12 - C 13 | 0.70  | 0.89 | 0.022 |
| 33. BD ( 1) C 14 - H 27 | /282. BD* ( 1) C 13 - C 15 | 3.16  | 1.11 | 0.053 |
| 33. BD ( 1) C 14 - H 27 | /284. BD* ( 1) C 14 - C 16 | 1.53  | 1.16 | 0.038 |
| 33. BD ( 1) C 14 - H 27 | /289. BD* ( 1) C 16 - C 18 | 5.62  | 0.98 | 0.066 |
| 33. BD ( 1) C 14 - H 27 | /290. BD* ( 1) C 16 - H 28 | 0.98  | 0.96 | 0.027 |
| 34. BD ( 1) C 15 - C 17 | /167. RY* ( 2) C 13        | 1.48  | 2.07 | 0.050 |
| 34. BD ( 1) C 15 - C 17 | /206. RY* ( 1) C 18        | 0.71  | 1.85 | 0.033 |
| 34. BD ( 1) C 15 - C 17 | /207. RY* ( 2) C 18        | 1.46  | 1.97 | 0.048 |
| 34. BD ( 1) C 15 - C 17 | /280. BD* ( 1) N 12 - C 13 | 4.97  | 1.04 | 0.064 |
| 34. BD ( 1) C 15 - C 17 | /282. BD* ( 1) C 13 - C 15 | 3.77  | 1.26 | 0.061 |
| 34. BD ( 1) C 15 - C 17 | /291. BD* ( 1) C 17 - C 18 | 2.38  | 1.30 | 0.050 |
| 34. BD ( 1) C 15 - C 17 | /293. BD* ( 1) C 17 - H 29 | 0.56  | 1.10 | 0.022 |
| 34. BD ( 1) C 15 - C 17 | /294. BD* ( 1) C 18 - H 30 | 2.87  | 1.11 | 0.050 |
| 34. BD ( 1) C 15 - C 17 | /295. BD* ( 1) O 19 - H 32 | 1.79  | 0.98 | 0.037 |
| 35. BD ( 1) C 15 - O 19 | /182. RY* ( 1) C 15        | 0.60  | 2.04 | 0.031 |
| 35. BD ( 1) C 15 - O 19 | /281. BD* ( 1) C 13 - C 14 | 2.46  | 1.33 | 0.052 |
| 35. BD ( 1) C 15 - O 19 | /282. BD* ( 1) C 13 - C 15 | 1.34  | 1.49 | 0.040 |
| 35. BD ( 1) C 15 - O 19 | /291. BD* ( 1) C 17 - C 18 | 0.83  | 1.54 | 0.032 |
| 36. BD ( 1) C 16 - C 18 | /175. RY* ( 2) C 14        | 1.45  | 1.77 | 0.045 |
| 36. BD ( 1) C 16 - C 18 | /176. RY* ( 3) C 14        | 0.50  | 1.78 | 0.027 |
| 36. BD ( 1) C 16 - C 18 | /199. RY* ( 2) C 17        | 1.91  | 1.90 | 0.054 |
| 36. BD ( 1) C 16 - C 18 | /284. BD* ( 1) C 14 - C 16 | 2.57  | 1.30 | 0.052 |
| 36. BD ( 1) C 16 - C 18 | /286. BD* ( 1) C 14 - H 27 | 3.14  | 1.10 | 0.052 |
| 36. BD ( 1) C 16 - C 18 | /290. BD* ( 1) C 16 - H 28 | 0.59  | 1.09 | 0.023 |
| 36. BD ( 1) C 16 - C 18 | /291. BD* ( 1) C 17 - C 18 | 2.44  | 1.29 | 0.050 |
| 36. BD ( 1) C 16 - C 18 | /293. BD* ( 1) C 17 - H 29 | 3.28  | 1.08 | 0.053 |
| 36. BD ( 1) C 16 - C 18 | /294. BD* ( 1) C 18 - H 30 | 0.59  | 1.09 | 0.023 |

|                         |                            |       |       |       |
|-------------------------|----------------------------|-------|-------|-------|
| 37. BD ( 1) C 16 - H 28 | /174. RY* ( 1) C 14        | 1.40  | 1.79  | 0.045 |
| 37. BD ( 1) C 16 - H 28 | /206. RY* ( 1) C 18        | 1.04  | 1.70  | 0.038 |
| 37. BD ( 1) C 16 - H 28 | /281. BD* ( 1) C 13 - C 14 | 5.82  | 0.95  | 0.067 |
| 37. BD ( 1) C 16 - H 28 | /284. BD* ( 1) C 14 - C 16 | 1.50  | 1.16  | 0.037 |
| 37. BD ( 1) C 16 - H 28 | /286. BD* ( 1) C 14 - H 27 | 0.94  | 0.96  | 0.027 |
| 37. BD ( 1) C 16 - H 28 | /291. BD* ( 1) C 17 - C 18 | 2.66  | 1.15  | 0.050 |
| 38. BD ( 1) C 17 - C 18 | /182. RY* ( 1) C 15        | 1.53  | 1.90  | 0.048 |
| 38. BD ( 1) C 17 - C 18 | /190. RY* ( 1) C 16        | 1.06  | 2.00  | 0.041 |
| 38. BD ( 1) C 17 - C 18 | /191. RY* ( 2) C 16        | 0.86  | 2.08  | 0.038 |
| 38. BD ( 1) C 17 - C 18 | /287. BD* ( 1) C 15 - C 17 | 2.11  | 1.19  | 0.045 |
| 38. BD ( 1) C 17 - C 18 | /288. BD* ( 1) C 15 - O 19 | 2.75  | 1.03  | 0.048 |
| 38. BD ( 1) C 17 - C 18 | /289. BD* ( 1) C 16 - C 18 | 2.29  | 1.22  | 0.047 |
| 38. BD ( 1) C 17 - C 18 | /290. BD* ( 1) C 16 - H 28 | 1.61  | 1.20  | 0.039 |
| 38. BD ( 1) C 17 - C 18 | /293. BD* ( 1) C 17 - H 29 | 1.84  | 1.19  | 0.042 |
| 38. BD ( 1) C 17 - C 18 | /294. BD* ( 1) C 18 - H 30 | 1.47  | 1.20  | 0.038 |
| 39. BD ( 2) C 17 - C 18 | /185. RY* ( 4) C 15        | 0.56  | 0.81  | 0.020 |
| 39. BD ( 2) C 17 - C 18 | /192. RY* ( 3) C 16        | 0.98  | 0.79  | 0.026 |
| 39. BD ( 2) C 17 - C 18 | /283. BD* ( 2) C 13 - C 15 | 15.15 | 0.30  | 0.062 |
| 39. BD ( 2) C 17 - C 18 | /285. BD* ( 2) C 14 - C 16 | 12.02 | 0.32  | 0.055 |
| 40. BD ( 1) C 17 - H 29 | /182. RY* ( 1) C 15        | 0.57  | 1.67  | 0.028 |
| 40. BD ( 1) C 17 - H 29 | /206. RY* ( 1) C 18        | 1.31  | 1.71  | 0.042 |
| 40. BD ( 1) C 17 - H 29 | /282. BD* ( 1) C 13 - C 15 | 3.06  | 1.11  | 0.052 |
| 40. BD ( 1) C 17 - H 29 | /288. BD* ( 1) C 15 - O 19 | 0.81  | 0.79  | 0.023 |
| 40. BD ( 1) C 17 - H 29 | /289. BD* ( 1) C 16 - C 18 | 5.45  | 0.98  | 0.065 |
| 40. BD ( 1) C 17 - H 29 | /291. BD* ( 1) C 17 - C 18 | 1.59  | 1.16  | 0.038 |
| 40. BD ( 1) C 17 - H 29 | /294. BD* ( 1) C 18 - H 30 | 0.99  | 0.96  | 0.028 |
| 41. BD ( 1) C 18 - H 30 | /190. RY* ( 1) C 16        | 1.30  | 1.76  | 0.043 |
| 41. BD ( 1) C 18 - H 30 | /198. RY* ( 1) C 17        | 1.59  | 1.79  | 0.048 |
| 41. BD ( 1) C 18 - H 30 | /284. BD* ( 1) C 14 - C 16 | 2.74  | 1.17  | 0.051 |
| 41. BD ( 1) C 18 - H 30 | /287. BD* ( 1) C 15 - C 17 | 6.06  | 0.95  | 0.068 |
| 41. BD ( 1) C 18 - H 30 | /291. BD* ( 1) C 17 - C 18 | 1.36  | 1.16  | 0.035 |
| 41. BD ( 1) C 18 - H 30 | /293. BD* ( 1) C 17 - H 29 | 1.00  | 0.95  | 0.028 |
| 42. BD ( 1) O 19 - H 32 | /182. RY* ( 1) C 15        | 2.86  | 1.87  | 0.065 |
| 42. BD ( 1) O 19 - H 32 | /287. BD* ( 1) C 15 - C 17 | 4.00  | 1.15  | 0.061 |
| 43. BD ( 1) O 20 - H 31 | / 70. RY* ( 1) C 1         | 2.68  | 1.84  | 0.063 |
| 43. BD ( 1) O 20 - H 31 | /254. BD* ( 1) C 1 - C 2   | 4.47  | 1.16  | 0.065 |
| 44. CR ( 1) C 1         | / 78. RY* ( 1) C 2         | 1.23  | 11.77 | 0.108 |
| 44. CR ( 1) C 1         | / 87. RY* ( 2) C 3         | 2.32  | 11.43 | 0.145 |
| 44. CR ( 1) C 1         | /255. BD* ( 1) C 1 - C 3   | 1.92  | 10.75 | 0.129 |
| 44. CR ( 1) C 1         | /257. BD* ( 1) C 1 - O 20  | 1.32  | 10.41 | 0.105 |
| 44. CR ( 1) C 1         | /258. BD* ( 1) C 2 - C 4   | 0.69  | 10.76 | 0.078 |
| 44. CR ( 1) C 1         | /260. BD* ( 1) C 2 - C 7   | 0.67  | 10.58 | 0.075 |
| 44. CR ( 1) C 1         | /261. BD* ( 1) C 3 - C 5   | 0.94  | 10.59 | 0.089 |
| 45. CR ( 1) C 2         | / 71. RY* ( 2) C 1         | 1.59  | 11.48 | 0.121 |
| 45. CR ( 1) C 2         | / 94. RY* ( 1) C 4         | 1.07  | 11.67 | 0.100 |
| 45. CR ( 1) C 2         | / 95. RY* ( 2) C 4         | 1.79  | 11.58 | 0.128 |
| 45. CR ( 1) C 2         | /119. RY* ( 2) C 7         | 1.09  | 11.18 | 0.099 |
| 45. CR ( 1) C 2         | /255. BD* ( 1) C 1 - C 3   | 0.69  | 10.68 | 0.077 |
| 45. CR ( 1) C 2         | /257. BD* ( 1) C 1 - O 20  | 0.59  | 10.34 | 0.070 |
| 45. CR ( 1) C 2         | /258. BD* ( 1) C 2 - C 4   | 1.29  | 10.69 | 0.105 |
| 45. CR ( 1) C 2         | /263. BD* ( 1) C 4 - C 6   | 1.21  | 10.51 | 0.101 |
| 45. CR ( 1) C 2         | /264. BD* ( 1) C 4 - C 9   | 1.03  | 10.51 | 0.093 |
| 45. CR ( 1) C 2         | /269. BD* ( 1) C 7 - C 8   | 0.56  | 10.71 | 0.069 |
| 46. CR ( 1) C 3         | / 70. RY* ( 1) C 1         | 1.99  | 11.17 | 0.133 |
| 46. CR ( 1) C 3         | / 72. RY* ( 3) C 1         | 1.38  | 11.31 | 0.111 |
| 46. CR ( 1) C 3         | /104. RY* ( 3) C 5         | 0.96  | 11.53 | 0.094 |
| 46. CR ( 1) C 3         | /231. RY* ( 2) H 21        | 0.58  | 12.28 | 0.076 |
| 46. CR ( 1) C 3         | /254. BD* ( 1) C 1 - C 2   | 1.29  | 10.48 | 0.105 |
| 46. CR ( 1) C 3         | /255. BD* ( 1) C 1 - C 3   | 0.64  | 10.66 | 0.074 |
| 46. CR ( 1) C 3         | /257. BD* ( 1) C 1 - O 20  | 0.75  | 10.32 | 0.079 |
| 46. CR ( 1) C 3         | /265. BD* ( 1) C 5 - C 6   | 0.67  | 10.67 | 0.076 |
| 47. CR ( 1) C 4         | / 78. RY* ( 1) C 2         | 0.56  | 11.70 | 0.072 |
| 47. CR ( 1) C 4         | / 79. RY* ( 2) C 2         | 2.22  | 11.53 | 0.143 |
| 47. CR ( 1) C 4         | /111. RY* ( 2) C 6         | 0.75  | 11.41 | 0.083 |
| 47. CR ( 1) C 4         | /112. RY* ( 3) C 6         | 0.53  | 11.18 | 0.068 |
| 47. CR ( 1) C 4         | /135. RY* ( 2) C 9         | 1.12  | 11.15 | 0.100 |
| 47. CR ( 1) C 4         | /254. BD* ( 1) C 1 - C 2   | 1.19  | 10.50 | 0.101 |
| 47. CR ( 1) C 4         | /258. BD* ( 1) C 2 - C 4   | 1.20  | 10.69 | 0.102 |
| 47. CR ( 1) C 4         | /260. BD* ( 1) C 2 - C 7   | 1.04  | 10.51 | 0.094 |
| 47. CR ( 1) C 4         | /265. BD* ( 1) C 5 - C 6   | 0.68  | 10.68 | 0.076 |
| 47. CR ( 1) C 4         | /268. BD* ( 1) C 6 - N 11  | 0.60  | 10.44 | 0.071 |

|                  |                            |      |       |       |
|------------------|----------------------------|------|-------|-------|
| 47. CR ( 1) C 4  | /274. BD* ( 1) C 9 - C 10  | 0.56 | 10.71 | 0.069 |
| 48. CR ( 1) C 5  | / 89. RY* ( 4) C 3         | 0.54 | 11.26 | 0.069 |
| 48. CR ( 1) C 5  | /111. RY* ( 2) C 6         | 3.03 | 11.39 | 0.166 |
| 48. CR ( 1) C 5  | /233. RY* ( 2) H 22        | 0.54 | 12.29 | 0.073 |
| 48. CR ( 1) C 5  | /255. BD* ( 1) C 1 - C 3   | 0.66 | 10.66 | 0.075 |
| 48. CR ( 1) C 5  | /263. BD* ( 1) C 4 - C 6   | 1.30 | 10.50 | 0.105 |
| 48. CR ( 1) C 5  | /265. BD* ( 1) C 5 - C 6   | 0.77 | 10.67 | 0.082 |
| 48. CR ( 1) C 5  | /268. BD* ( 1) C 6 - N 11  | 0.81 | 10.43 | 0.083 |
| 49. CR ( 1) C 6  | / 94. RY* ( 1) C 4         | 1.15 | 11.70 | 0.104 |
| 49. CR ( 1) C 6  | / 96. RY* ( 3) C 4         | 0.50 | 11.19 | 0.067 |
| 49. CR ( 1) C 6  | /103. RY* ( 2) C 5         | 2.16 | 11.33 | 0.140 |
| 49. CR ( 1) C 6  | /258. BD* ( 1) C 2 - C 4   | 0.70 | 10.71 | 0.078 |
| 49. CR ( 1) C 6  | /261. BD* ( 1) C 3 - C 5   | 0.95 | 10.55 | 0.090 |
| 49. CR ( 1) C 6  | /264. BD* ( 1) C 4 - C 9   | 0.70 | 10.54 | 0.077 |
| 49. CR ( 1) C 6  | /265. BD* ( 1) C 5 - C 6   | 1.50 | 10.71 | 0.114 |
| 49. CR ( 1) C 6  | /278. BD* ( 1) N 11 - N 12 | 0.81 | 10.61 | 0.083 |
| 50. CR ( 1) C 7  | / 79. RY* ( 2) C 2         | 0.79 | 11.50 | 0.085 |
| 50. CR ( 1) C 7  | /127. RY* ( 2) C 8         | 2.16 | 11.36 | 0.140 |
| 50. CR ( 1) C 7  | /235. RY* ( 2) H 23        | 0.60 | 12.29 | 0.076 |
| 50. CR ( 1) C 7  | /254. BD* ( 1) C 1 - C 2   | 0.66 | 10.47 | 0.075 |
| 50. CR ( 1) C 7  | /258. BD* ( 1) C 2 - C 4   | 0.82 | 10.66 | 0.084 |
| 50. CR ( 1) C 7  | /269. BD* ( 1) C 7 - C 8   | 0.84 | 10.69 | 0.085 |
| 50. CR ( 1) C 7  | /272. BD* ( 1) C 8 - C 10  | 1.06 | 10.50 | 0.095 |
| 51. CR ( 1) C 8  | /118. RY* ( 1) C 7         | 0.67 | 11.25 | 0.077 |
| 51. CR ( 1) C 8  | /119. RY* ( 2) C 7         | 1.23 | 11.16 | 0.105 |
| 51. CR ( 1) C 8  | /121. RY* ( 4) C 7         | 0.97 | 11.17 | 0.093 |
| 51. CR ( 1) C 8  | /143. RY* ( 2) C 10        | 0.92 | 11.38 | 0.091 |
| 51. CR ( 1) C 8  | /237. RY* ( 2) H 24        | 0.64 | 11.99 | 0.078 |
| 51. CR ( 1) C 8  | /260. BD* ( 1) C 2 - C 7   | 1.17 | 10.49 | 0.100 |
| 51. CR ( 1) C 8  | /269. BD* ( 1) C 7 - C 8   | 0.78 | 10.69 | 0.082 |
| 51. CR ( 1) C 8  | /274. BD* ( 1) C 9 - C 10  | 0.62 | 10.69 | 0.073 |
| 52. CR ( 1) C 9  | / 95. RY* ( 2) C 4         | 1.07 | 11.56 | 0.099 |
| 52. CR ( 1) C 9  | /143. RY* ( 2) C 10        | 2.13 | 11.38 | 0.139 |
| 52. CR ( 1) C 9  | /239. RY* ( 2) H 25        | 0.54 | 12.28 | 0.073 |
| 52. CR ( 1) C 9  | /258. BD* ( 1) C 2 - C 4   | 0.83 | 10.66 | 0.084 |
| 52. CR ( 1) C 9  | /263. BD* ( 1) C 4 - C 6   | 0.68 | 10.49 | 0.076 |
| 52. CR ( 1) C 9  | /272. BD* ( 1) C 8 - C 10  | 1.07 | 10.50 | 0.095 |
| 52. CR ( 1) C 9  | /274. BD* ( 1) C 9 - C 10  | 0.84 | 10.69 | 0.085 |
| 53. CR ( 1) C 10 | /127. RY* ( 2) C 8         | 0.90 | 11.36 | 0.090 |
| 53. CR ( 1) C 10 | /134. RY* ( 1) C 9         | 0.71 | 11.26 | 0.080 |
| 53. CR ( 1) C 10 | /135. RY* ( 2) C 9         | 1.15 | 11.12 | 0.101 |
| 53. CR ( 1) C 10 | /137. RY* ( 4) C 9         | 1.04 | 11.21 | 0.096 |
| 53. CR ( 1) C 10 | /241. RY* ( 2) H 26        | 0.62 | 11.97 | 0.077 |
| 53. CR ( 1) C 10 | /264. BD* ( 1) C 4 - C 9   | 1.18 | 10.49 | 0.100 |
| 53. CR ( 1) C 10 | /269. BD* ( 1) C 7 - C 8   | 0.62 | 10.69 | 0.073 |
| 53. CR ( 1) C 10 | /274. BD* ( 1) C 9 - C 10  | 0.78 | 10.69 | 0.082 |
| 54. CR ( 1) N 11 | /110. RY* ( 1) C 6         | 2.45 | 15.17 | 0.173 |
| 54. CR ( 1) N 11 | /159. RY* ( 2) N 12        | 1.87 | 15.28 | 0.151 |
| 54. CR ( 1) N 11 | /265. BD* ( 1) C 5 - C 6   | 0.70 | 14.82 | 0.091 |
| 54. CR ( 1) N 11 | /280. BD* ( 1) N 12 - C 13 | 1.23 | 14.58 | 0.121 |
| 55. CR ( 1) N 12 | /151. RY* ( 2) N 11        | 1.81 | 15.31 | 0.149 |
| 55. CR ( 1) N 12 | /166. RY* ( 1) C 13        | 2.20 | 15.22 | 0.164 |
| 55. CR ( 1) N 12 | /268. BD* ( 1) C 6 - N 11  | 1.26 | 14.58 | 0.122 |
| 55. CR ( 1) N 12 | /281. BD* ( 1) C 13 - C 14 | 0.58 | 14.65 | 0.083 |
| 56. CR ( 1) C 13 | /175. RY* ( 2) C 14        | 1.22 | 11.21 | 0.104 |
| 56. CR ( 1) C 13 | /182. RY* ( 1) C 15        | 1.93 | 11.24 | 0.132 |
| 56. CR ( 1) C 13 | /183. RY* ( 2) C 15        | 0.68 | 11.42 | 0.079 |
| 56. CR ( 1) C 13 | /184. RY* ( 3) C 15        | 0.64 | 11.31 | 0.076 |
| 56. CR ( 1) C 13 | /278. BD* ( 1) N 11 - N 12 | 0.81 | 10.62 | 0.083 |
| 56. CR ( 1) C 13 | /282. BD* ( 1) C 13 - C 15 | 1.25 | 10.69 | 0.104 |
| 56. CR ( 1) C 13 | /284. BD* ( 1) C 14 - C 16 | 0.57 | 10.74 | 0.070 |
| 56. CR ( 1) C 13 | /287. BD* ( 1) C 15 - C 17 | 1.01 | 10.53 | 0.093 |
| 56. CR ( 1) C 13 | /288. BD* ( 1) C 15 - O 19 | 0.79 | 10.37 | 0.081 |
| 57. CR ( 1) C 14 | /167. RY* ( 2) C 13        | 1.50 | 11.45 | 0.117 |
| 57. CR ( 1) C 14 | /191. RY* ( 2) C 16        | 2.21 | 11.37 | 0.142 |
| 57. CR ( 1) C 14 | /243. RY* ( 2) H 27        | 0.53 | 12.28 | 0.072 |
| 57. CR ( 1) C 14 | /282. BD* ( 1) C 13 - C 15 | 0.76 | 10.64 | 0.081 |
| 57. CR ( 1) C 14 | /284. BD* ( 1) C 14 - C 16 | 0.89 | 10.69 | 0.087 |
| 57. CR ( 1) C 14 | /289. BD* ( 1) C 16 - C 18 | 1.07 | 10.50 | 0.095 |
| 58. CR ( 1) C 15 | /166. RY* ( 1) C 13        | 0.92 | 11.15 | 0.091 |
| 58. CR ( 1) C 15 | /167. RY* ( 2) C 13        | 1.14 | 11.54 | 0.103 |



|                           |                            |        |       |       |
|---------------------------|----------------------------|--------|-------|-------|
| 58. CR ( 1) C 15          | /168. RY* ( 3) C 13        | 1.07   | 11.16 | 0.098 |
| 58. CR ( 1) C 15          | /199. RY* ( 2) C 17        | 1.00   | 11.39 | 0.095 |
| 58. CR ( 1) C 15          | /280. BD* ( 1) N 12 - C 13 | 1.00   | 10.52 | 0.092 |
| 58. CR ( 1) C 15          | /281. BD* ( 1) C 13 - C 14 | 1.00   | 10.58 | 0.093 |
| 58. CR ( 1) C 15          | /282. BD* ( 1) C 13 - C 15 | 1.73   | 10.73 | 0.123 |
| 58. CR ( 1) C 15          | /288. BD* ( 1) C 15 - O 19 | 1.21   | 10.41 | 0.101 |
| 58. CR ( 1) C 15          | /291. BD* ( 1) C 17 - C 18 | 0.56   | 10.78 | 0.069 |
| 59. CR ( 1) C 16          | /174. RY* ( 1) C 14        | 0.58   | 11.31 | 0.073 |
| 59. CR ( 1) C 16          | /175. RY* ( 2) C 14        | 0.55   | 11.16 | 0.070 |
| 59. CR ( 1) C 16          | /176. RY* ( 3) C 14        | 1.70   | 11.17 | 0.123 |
| 59. CR ( 1) C 16          | /207. RY* ( 2) C 18        | 0.93   | 11.35 | 0.092 |
| 59. CR ( 1) C 16          | /245. RY* ( 2) H 28        | 0.66   | 12.29 | 0.081 |
| 59. CR ( 1) C 16          | /281. BD* ( 1) C 13 - C 14 | 1.10   | 10.48 | 0.097 |
| 59. CR ( 1) C 16          | /284. BD* ( 1) C 14 - C 16 | 0.78   | 10.69 | 0.082 |
| 59. CR ( 1) C 16          | /291. BD* ( 1) C 17 - C 18 | 0.61   | 10.68 | 0.072 |
| 60. CR ( 1) C 17          | /183. RY* ( 2) C 15        | 1.74   | 11.37 | 0.126 |
| 60. CR ( 1) C 17          | /207. RY* ( 2) C 18        | 2.16   | 11.36 | 0.140 |
| 60. CR ( 1) C 17          | /247. RY* ( 2) H 29        | 0.63   | 12.30 | 0.079 |
| 60. CR ( 1) C 17          | /282. BD* ( 1) C 13 - C 15 | 0.82   | 10.64 | 0.084 |
| 60. CR ( 1) C 17          | /288. BD* ( 1) C 15 - O 19 | 0.51   | 10.32 | 0.065 |
| 60. CR ( 1) C 17          | /289. BD* ( 1) C 16 - C 18 | 1.04   | 10.51 | 0.094 |
| 60. CR ( 1) C 17          | /291. BD* ( 1) C 17 - C 18 | 0.91   | 10.69 | 0.088 |
| 61. CR ( 1) C 18          | /191. RY* ( 2) C 16        | 0.89   | 11.38 | 0.090 |
| 61. CR ( 1) C 18          | /198. RY* ( 1) C 17        | 0.80   | 11.32 | 0.085 |
| 61. CR ( 1) C 18          | /199. RY* ( 2) C 17        | 1.64   | 11.30 | 0.122 |
| 61. CR ( 1) C 18          | /249. RY* ( 2) H 30        | 0.64   | 11.97 | 0.078 |
| 61. CR ( 1) C 18          | /284. BD* ( 1) C 14 - C 16 | 0.61   | 10.70 | 0.072 |
| 61. CR ( 1) C 18          | /287. BD* ( 1) C 15 - C 17 | 1.10   | 10.48 | 0.097 |
| 61. CR ( 1) C 18          | /291. BD* ( 1) C 17 - C 18 | 0.72   | 10.69 | 0.079 |
| 62. CR ( 1) O 19          | /182. RY* ( 1) C 15        | 2.24   | 20.10 | 0.190 |
| 62. CR ( 1) O 19          | /253. RY* ( 2) H 32        | 0.58   | 20.97 | 0.099 |
| 62. CR ( 1) O 19          | /282. BD* ( 1) C 13 - C 15 | 0.59   | 19.55 | 0.097 |
| 63. CR ( 1) O 20          | / 70. RY* ( 1) C 1         | 2.08   | 20.09 | 0.183 |
| 63. CR ( 1) O 20          | /255. BD* ( 1) C 1 - C 3   | 0.55   | 19.57 | 0.093 |
| 64. LP ( 1) N 11          | /110. RY* ( 1) C 6         | 3.30   | 1.34  | 0.060 |
| 64. LP ( 1) N 11          | /158. RY* ( 1) N 12        | 1.62   | 1.31  | 0.042 |
| 64. LP ( 1) N 11          | /159. RY* ( 2) N 12        | 1.04   | 1.45  | 0.035 |
| 64. LP ( 1) N 11          | /263. BD* ( 1) C 4 - C 6   | 0.94   | 0.82  | 0.025 |
| 64. LP ( 1) N 11          | /265. BD* ( 1) C 5 - C 6   | 6.93   | 0.99  | 0.074 |
| 65. LP ( 1) N 12          | /150. RY* ( 1) N 11        | 2.06   | 1.36  | 0.048 |
| 65. LP ( 1) N 12          | /151. RY* ( 2) N 11        | 1.08   | 1.48  | 0.036 |
| 65. LP ( 1) N 12          | /166. RY* ( 1) C 13        | 2.84   | 1.39  | 0.057 |
| 65. LP ( 1) N 12          | /281. BD* ( 1) C 13 - C 14 | 7.99   | 0.82  | 0.072 |
| 65. LP ( 1) N 12          | /282. BD* ( 1) C 13 - C 15 | 0.80   | 0.97  | 0.025 |
| 65. LP ( 1) N 12          | /295. BD* ( 1) O 19 - H 32 | 0.78   | 0.69  | 0.021 |
| 66. LP ( 1) O 19          | /182. RY* ( 1) C 15        | 2.72   | 1.73  | 0.061 |
| 66. LP ( 1) O 19          | /253. RY* ( 2) H 32        | 0.68   | 2.60  | 0.038 |
| 66. LP ( 1) O 19          | /282. BD* ( 1) C 13 - C 15 | 6.19   | 1.18  | 0.076 |
| 67. LP ( 2) O 19          | /283. BD* ( 2) C 13 - C 15 | 27.81  | 0.34  | 0.091 |
| 68. LP ( 1) O 20          | / 70. RY* ( 1) C 1         | 2.63   | 1.72  | 0.060 |
| 68. LP ( 1) O 20          | /255. BD* ( 1) C 1 - C 3   | 5.28   | 1.20  | 0.071 |
| 69. LP ( 2) O 20          | /256. BD* ( 2) C 1 - C 3   | 27.19  | 0.35  | 0.090 |
| 256. BD* ( 2) C 1 - C 3   | / 73. RY* ( 4) C 1         | 1.13   | 0.51  | 0.058 |
| 256. BD* ( 2) C 1 - C 3   | / 88. RY* ( 3) C 3         | 2.18   | 0.48  | 0.078 |
| 256. BD* ( 2) C 1 - C 3   | /259. BD* ( 2) C 2 - C 4   | 132.62 | 0.02  | 0.073 |
| 259. BD* ( 2) C 2 - C 4   | / 81. RY* ( 4) C 2         | 2.32   | 0.54  | 0.075 |
| 259. BD* ( 2) C 2 - C 4   | / 97. RY* ( 4) C 4         | 2.31   | 0.55  | 0.075 |
| 266. BD* ( 2) C 5 - C 6   | /105. RY* ( 4) C 5         | 2.35   | 0.48  | 0.082 |
| 266. BD* ( 2) C 5 - C 6   | /113. RY* ( 4) C 6         | 1.23   | 0.52  | 0.062 |
| 270. BD* ( 2) C 7 - C 8   | /120. RY* ( 3) C 7         | 1.43   | 0.45  | 0.075 |
| 270. BD* ( 2) C 7 - C 8   | /128. RY* ( 3) C 8         | 1.44   | 0.46  | 0.077 |
| 275. BD* ( 2) C 9 - C 10  | /136. RY* ( 3) C 9         | 1.40   | 0.47  | 0.076 |
| 275. BD* ( 2) C 9 - C 10  | /144. RY* ( 3) C 10        | 1.43   | 0.46  | 0.076 |
| 279. BD* ( 2) N 11 - N 12 | /152. RY* ( 3) N 11        | 1.04   | 0.75  | 0.070 |
| 279. BD* ( 2) N 11 - N 12 | /160. RY* ( 3) N 12        | 0.98   | 0.75  | 0.067 |
| 279. BD* ( 2) N 11 - N 12 | /266. BD* ( 2) C 5 - C 6   | 19.28  | 0.08  | 0.068 |
| 279. BD* ( 2) N 11 - N 12 | /283. BD* ( 2) C 13 - C 15 | 21.60  | 0.07  | 0.061 |
| 283. BD* ( 2) C 13 - C 15 | /169. RY* ( 4) C 13        | 1.71   | 0.53  | 0.065 |
| 283. BD* ( 2) C 13 - C 15 | /185. RY* ( 4) C 15        | 1.72   | 0.51  | 0.064 |
| 283. BD* ( 2) C 13 - C 15 | /285. BD* ( 2) C 14 - C 16 | 76.25  | 0.02  | 0.069 |
| 283. BD* ( 2) C 13 - C 15 | /292. BD* ( 2) C 17 - C 18 | 116.70 | 0.02  | 0.072 |

|                           |                     |      |      |       |
|---------------------------|---------------------|------|------|-------|
| 285. BD* ( 2) C 14 - C 16 | /177. RY* ( 4) C 14 | 1.47 | 0.47 | 0.076 |
| 285. BD* ( 2) C 14 - C 16 | /192. RY* ( 3) C 16 | 1.48 | 0.47 | 0.076 |
| 292. BD* ( 2) C 17 - C 18 | /200. RY* ( 3) C 17 | 1.58 | 0.46 | 0.076 |
| 292. BD* ( 2) C 17 - C 18 | /208. RY* ( 3) C 18 | 1.56 | 0.47 | 0.076 |

**Table (S6):** Summary of Natural Population Analysis of the Cr(III) complex:

| Atom | No | Natural Charge | Natural Population |         |         | Total    |
|------|----|----------------|--------------------|---------|---------|----------|
|      |    |                | Core               | Valence | Rydberg |          |
| C    | 1  | 0.30563        | 1.99867            | 3.67636 | 0.01934 | 5.69437  |
| C    | 2  | -0.08377       | 1.99885            | 4.06796 | 0.01696 | 6.08377  |
| C    | 3  | -0.18124       | 1.99903            | 4.16339 | 0.01882 | 6.18124  |
| C    | 4  | -0.03697       | 1.99885            | 4.02025 | 0.01787 | 6.03697  |
| C    | 5  | -0.22476       | 1.99894            | 4.20641 | 0.01942 | 6.22476  |
| C    | 6  | 0.14716        | 1.99876            | 3.83109 | 0.02298 | 5.85284  |
| C    | 7  | -0.24318       | 1.99907            | 4.22811 | 0.01600 | 6.24318  |
| C    | 8  | -0.15576       | 1.99909            | 4.13997 | 0.01669 | 6.15576  |
| C    | 9  | -0.22471       | 1.99905            | 4.21058 | 0.01508 | 6.22471  |
| C    | 10 | -0.21236       | 1.99907            | 4.19690 | 0.01638 | 6.21236  |
| N    | 11 | -0.35329       | 1.99930            | 5.32830 | 0.02569 | 7.35329  |
| N    | 12 | -0.01950       | 1.99916            | 5.00064 | 0.01971 | 7.01950  |
| C    | 13 | 0.06139        | 1.99873            | 3.92217 | 0.01771 | 5.93861  |
| C    | 14 | -0.23787       | 1.99905            | 4.21456 | 0.02426 | 6.23787  |
| C    | 15 | 0.29681        | 1.99867            | 3.68396 | 0.02056 | 5.70319  |
| C    | 16 | -0.17334       | 1.99912            | 4.15446 | 0.01976 | 6.17334  |
| C    | 17 | -0.23487       | 1.99901            | 4.21354 | 0.02232 | 6.23487  |
| C    | 18 | -0.21038       | 1.99913            | 4.19655 | 0.01470 | 6.21038  |
| O    | 19 | -0.68886       | 1.99982            | 6.68378 | 0.00526 | 8.68886  |
| O    | 20 | -0.64528       | 1.99979            | 6.64168 | 0.00381 | 8.64528  |
| H    | 21 | 0.21917        | 0.00000            | 0.77836 | 0.00248 | 0.78083  |
| H    | 22 | 0.20463        | 0.00000            | 0.79255 | 0.00282 | 0.79537  |
| H    | 23 | 0.20517        | 0.00000            | 0.79306 | 0.00177 | 0.79483  |
| H    | 24 | 0.22735        | 0.00000            | 0.76972 | 0.00293 | 0.77265  |
| H    | 25 | 0.20564        | 0.00000            | 0.79257 | 0.00180 | 0.79436  |
| H    | 26 | 0.20955        | 0.00000            | 0.78813 | 0.00232 | 0.79045  |
| H    | 27 | 0.20757        | 0.00000            | 0.79125 | 0.00118 | 0.79243  |
| H    | 28 | 0.21477        | 0.00000            | 0.78263 | 0.00259 | 0.78523  |
| H    | 29 | 0.21489        | 0.00000            | 0.78391 | 0.00120 | 0.78511  |
| H    | 30 | 0.49914        | 0.00000            | 0.49975 | 0.00112 | 0.50086  |
| H    | 31 | 0.22841        | 0.00000            | 0.76871 | 0.00287 | 0.77159  |
| C    | 32 | 0.30866        | 1.99868            | 3.67359 | 0.01908 | 5.69134  |
| C    | 33 | -0.08055       | 1.99883            | 4.06454 | 0.01717 | 6.08055  |
| C    | 34 | -0.16290       | 1.99902            | 4.14537 | 0.01851 | 6.16290  |
| C    | 35 | -0.07761       | 1.99886            | 4.05967 | 0.01908 | 6.07761  |
| C    | 36 | -0.20982       | 1.99893            | 4.18983 | 0.02106 | 6.20982  |
| C    | 37 | 0.13207        | 1.99875            | 3.84524 | 0.02395 | 5.86793  |
| C    | 38 | -0.23789       | 1.99907            | 4.22290 | 0.01593 | 6.23789  |
| C    | 39 | -0.16951       | 1.99909            | 4.15414 | 0.01627 | 6.16951  |
| C    | 40 | -0.25088       | 1.99906            | 4.23580 | 0.01602 | 6.25088  |
| C    | 41 | -0.19769       | 1.99907            | 4.18109 | 0.01753 | 6.19769  |
| N    | 42 | -0.39542       | 1.99931            | 5.36935 | 0.02676 | 7.39542  |
| N    | 43 | 0.00615        | 1.99915            | 4.97485 | 0.01985 | 6.99385  |
| C    | 44 | 0.05764        | 1.99873            | 3.92590 | 0.01772 | 5.94236  |
| C    | 45 | -0.22003       | 1.99905            | 4.19782 | 0.02315 | 6.22003  |
| C    | 46 | 0.30565        | 1.99867            | 3.67526 | 0.02042 | 5.69435  |
| C    | 47 | -0.16798       | 1.99912            | 4.14916 | 0.01970 | 6.16798  |
| C    | 48 | -0.22603       | 1.99901            | 4.20597 | 0.02105 | 6.22603  |
| C    | 49 | -0.20794       | 1.99913            | 4.19454 | 0.01427 | 6.20794  |
| O    | 50 | -0.64330       | 1.99979            | 6.63974 | 0.00378 | 8.64330  |
| H    | 51 | 0.22254        | 0.00000            | 0.77498 | 0.00248 | 0.77746  |
| H    | 52 | 0.20665        | 0.00000            | 0.79058 | 0.00277 | 0.79335  |
| H    | 53 | 0.20894        | 0.00000            | 0.78985 | 0.00121 | 0.79106  |
| H    | 54 | 0.21106        | 0.00000            | 0.78553 | 0.00341 | 0.78894  |
| H    | 55 | 0.20760        | 0.00000            | 0.79059 | 0.00181 | 0.79240  |
| H    | 56 | 0.21213        | 0.00000            | 0.78565 | 0.00222 | 0.78787  |
| H    | 57 | 0.20894        | 0.00000            | 0.78988 | 0.00118 | 0.79106  |
| H    | 58 | 0.21794        | 0.00000            | 0.77991 | 0.00215 | 0.78206  |
| H    | 59 | 0.21743        | 0.00000            | 0.78140 | 0.00117 | 0.78257  |
| H    | 60 | 0.49998        | 0.00000            | 0.49885 | 0.00117 | 0.50002  |
| H    | 61 | 0.22623        | 0.00000            | 0.77050 | 0.00327 | 0.77377  |
| O    | 62 | -0.70008       | 1.99981            | 6.69514 | 0.00513 | 8.70008  |
| Cr   | 63 | 1.44120        | 17.98827           | 4.54653 | 0.02399 | 22.55880 |

|           |    |          |           |           |         |           |
|-----------|----|----------|-----------|-----------|---------|-----------|
| H         | 64 | 0.51876  | 0.00000   | 0.47826   | 0.00298 | 0.48124   |
| H         | 65 | 0.51891  | 0.00000   | 0.47765   | 0.00344 | 0.48109   |
| O         | 66 | -0.86176 | 1.99979   | 6.85673   | 0.00524 | 8.86176   |
| Cl        | 67 | -0.64023 | 9.99978   | 7.63787   | 0.00258 | 17.64023  |
| =====     |    |          |           |           |         |           |
| * Total * |    | 0.00000  | 109.95011 | 214.25595 | 0.79394 | 325.00000 |

**Table (S7):** NBO data of the Cr(III) complex:

| Donor NBO (i) |           | Acceptor NBO (j) |    | kcal/mol         | a.u.   | a.u.               |
|---------------|-----------|------------------|----|------------------|--------|--------------------|
| within unit 1 |           |                  |    |                  |        |                    |
| 1.            | BD ( 1) C | 1 - C            | 2  | /198. RY* ( 2) C | 3      | 0.55 1.99 0.042    |
| 1.            | BD ( 1) C | 1 - C            | 2  | /199. RY* ( 3) C | 3      | 0.25 2.02 0.029    |
| 1.            | BD ( 1) C | 1 - C            | 2  | /206. RY* ( 2) C | 4      | 0.73 2.25 0.052    |
| 1.            | BD ( 1) C | 1 - C            | 2  | /229. RY* ( 1) C | 7      | 0.41 1.53 0.032    |
| 1.            | BD ( 1) C | 1 - C            | 2  | /230. RY* ( 2) C | 7      | 0.41 1.53 0.032    |
| 1.            | BD ( 1) C | 1 - C            | 2  | /592. BD* ( 1) C | 1 - C  | 3 1.47 1.26 0.055  |
| 1.            | BD ( 1) C | 1 - C            | 2  | /594. BD* ( 1) C | 2 - C  | 4 1.20 1.27 0.049  |
| 1.            | BD ( 1) C | 1 - C            | 2  | /595. BD* ( 1) C | 2 - C  | 7 0.61 1.10 0.033  |
| 1.            | BD ( 1) C | 1 - C            | 2  | /597. BD* ( 1) C | 3 - H  | 21 1.36 1.09 0.049 |
| 1.            | BD ( 1) C | 1 - C            | 2  | /599. BD* ( 1) C | 4 - C  | 9 2.02 1.12 0.060  |
| 1.            | BD ( 1) C | 1 - C            | 2  | /603. BD* ( 1) C | 7 - C  | 8 0.70 1.30 0.038  |
| 2.            | BD ( 2) C | 1 - C            | 2  | / 9. BD* ( 2) C  | 3 - C  | 5 5.68 0.23 0.066  |
| 2.            | BD ( 2) C | 1 - C            | 2  | / 13. BD* ( 2) C | 4 - C  | 6 5.28 0.24 0.062  |
| 2.            | BD ( 2) C | 1 - C            | 2  | /197. RY* ( 1) C | 3      | 1.20 0.77 0.039    |
| 2.            | BD ( 2) C | 1 - C            | 2  | /205. RY* ( 1) C | 4      | 0.80 0.87 0.034    |
| 2.            | BD ( 2) C | 1 - C            | 2  | /333. RY* ( 1) O | 20     | 0.38 1.15 0.027    |
| 2.            | BD ( 2) C | 1 - C            | 2  | /604. BD* ( 2) C | 7 - C  | 8 6.60 0.30 0.064  |
| 3.            | BD ( 1) C | 1 - C            | 3  | /191. RY* ( 3) C | 2      | 0.69 2.23 0.050    |
| 3.            | BD ( 1) C | 1 - C            | 3  | /215. RY* ( 3) C | 5      | 0.50 2.01 0.040    |
| 3.            | BD ( 1) C | 1 - C            | 3  | /590. BD* ( 1) C | 1 - C  | 2 1.44 1.19 0.053  |
| 3.            | BD ( 1) C | 1 - C            | 3  | /593. BD* ( 1) C | 1 - O  | 20 0.28 1.04 0.021 |
| 3.            | BD ( 1) C | 1 - C            | 3  | /595. BD* ( 1) C | 2 - C  | 7 1.13 1.22 0.047  |
| 3.            | BD ( 1) C | 1 - C            | 3  | /596. BD* ( 1) C | 3 - C  | 5 0.73 1.23 0.038  |
| 3.            | BD ( 1) C | 1 - C            | 3  | /597. BD* ( 1) C | 3 - H  | 21 0.60 1.20 0.034 |
| 3.            | BD ( 1) C | 1 - C            | 3  | /601. BD* ( 1) C | 5 - H  | 31 0.64 1.22 0.035 |
| 3.            | BD ( 1) C | 1 - C            | 3  | /626. BD* ( 1) O | 20 - H | 30 0.74 1.08 0.036 |
| 4.            | BD ( 1) C | 1 - O            | 20 | /198. RY* ( 2) C | 3      | 0.29 2.24 0.032    |
| 4.            | BD ( 1) C | 1 - O            | 20 | /592. BD* ( 1) C | 1 - C  | 3 0.37 1.51 0.030  |
| 4.            | BD ( 1) C | 1 - O            | 20 | /594. BD* ( 1) C | 2 - C  | 4 0.56 1.52 0.037  |
| 4.            | BD ( 1) C | 1 - O            | 20 | /596. BD* ( 1) C | 3 - C  | 5 0.99 1.36 0.046  |
| 5.            | BD ( 1) C | 2 - C            | 4  | /183. RY* ( 3) C | 1      | 0.45 2.21 0.040    |
| 5.            | BD ( 1) C | 2 - C            | 4  | /222. RY* ( 2) C | 6      | 0.48 1.95 0.039    |
| 5.            | BD ( 1) C | 2 - C            | 4  | /229. RY* ( 1) C | 7      | 0.29 1.62 0.028    |
| 5.            | BD ( 1) C | 2 - C            | 4  | /245. RY* ( 1) C | 9      | 0.39 1.98 0.035    |
| 5.            | BD ( 1) C | 2 - C            | 4  | /590. BD* ( 1) C | 1 - C  | 2 1.21 1.16 0.047  |
| 5.            | BD ( 1) C | 2 - C            | 4  | /593. BD* ( 1) C | 1 - O  | 20 1.32 1.02 0.046 |
| 5.            | BD ( 1) C | 2 - C            | 4  | /595. BD* ( 1) C | 2 - C  | 7 1.57 1.19 0.055  |
| 5.            | BD ( 1) C | 2 - C            | 4  | /598. BD* ( 1) C | 4 - C  | 6 1.50 1.20 0.054  |
| 5.            | BD ( 1) C | 2 - C            | 4  | /599. BD* ( 1) C | 4 - C  | 9 1.48 1.21 0.053  |
| 5.            | BD ( 1) C | 2 - C            | 4  | /602. BD* ( 1) C | 6 - N  | 11 1.44 1.12 0.051 |
| 5.            | BD ( 1) C | 2 - C            | 4  | /605. BD* ( 1) C | 7 - H  | 22 0.76 1.19 0.038 |
| 5.            | BD ( 1) C | 2 - C            | 4  | /610. BD* ( 1) C | 9 - H  | 24 0.69 1.22 0.037 |
| 6.            | BD ( 1) C | 2 - C            | 7  | /183. RY* ( 3) C | 1      | 0.35 2.10 0.034    |
| 6.            | BD ( 1) C | 2 - C            | 7  | /206. RY* ( 2) C | 4      | 0.48 2.24 0.042    |
| 6.            | BD ( 1) C | 2 - C            | 7  | /238. RY* ( 2) C | 8      | 0.32 1.98 0.032    |
| 6.            | BD ( 1) C | 2 - C            | 7  | /239. RY* ( 3) C | 8      | 0.70 1.99 0.047    |
| 6.            | BD ( 1) C | 2 - C            | 7  | /590. BD* ( 1) C | 1 - C  | 2 0.48 1.05 0.029  |
| 6.            | BD ( 1) C | 2 - C            | 7  | /592. BD* ( 1) C | 1 - C  | 3 0.73 1.25 0.038  |
| 6.            | BD ( 1) C | 2 - C            | 7  | /594. BD* ( 1) C | 2 - C  | 4 1.77 1.25 0.060  |
| 6.            | BD ( 1) C | 2 - C            | 7  | /598. BD* ( 1) C | 4 - C  | 6 2.41 1.09 0.065  |
| 6.            | BD ( 1) C | 2 - C            | 7  | /603. BD* ( 1) C | 7 - C  | 8 1.26 1.28 0.051  |
| 6.            | BD ( 1) C | 2 - C            | 7  | /605. BD* ( 1) C | 7 - H  | 22 0.30 1.08 0.023 |
| 6.            | BD ( 1) C | 2 - C            | 7  | /607. BD* ( 1) C | 8 - H  | 23 1.36 1.08 0.049 |
| 7.            | BD ( 1) C | 3 - C            | 5  | /182. RY* ( 2) C | 1      | 0.50 1.57 0.036    |
| 7.            | BD ( 1) C | 3 - C            | 5  | /183. RY* ( 3) C | 1      | 0.37 2.12 0.036    |
| 7.            | BD ( 1) C | 3 - C            | 5  | /223. RY* ( 3) C | 6      | 0.97 1.76 0.053    |
| 7.            | BD ( 1) C | 3 - C            | 5  | /592. BD* ( 1) C | 1 - C  | 3 0.84 1.26 0.041  |
| 7.            | BD ( 1) C | 3 - C            | 5  | /593. BD* ( 1) C | 1 - O  | 20 2.68 0.92 0.063 |
| 7.            | BD ( 1) C | 3 - C            | 5  | /600. BD* ( 1) C | 5 - C  | 6 1.08 1.29 0.047  |
| 7.            | BD ( 1) C | 3 - C            | 5  | /602. BD* ( 1) C | 6 - N  | 11 2.94 1.02 0.069 |
| 8.            | BD ( 2) C | 3 - C            | 5  | / 13. BD* ( 2) C | 4 - C  | 6 6.01 0.23 0.067  |

|                        |                            |       |      |       |
|------------------------|----------------------------|-------|------|-------|
| 8. BD ( 2) C 3 - C 5   | /181. RY* ( 1) C 1         | 0.28  | 1.04 | 0.022 |
| 8. BD ( 2) C 3 - C 5   | /221. RY* ( 1) C 6         | 0.30  | 1.14 | 0.024 |
| 8. BD ( 2) C 3 - C 5   | /591. BD* ( 2) C 1 - C 2   | 7.08  | 0.23 | 0.069 |
| 9. BD* ( 2) C 3 - C 5  | /197. RY* ( 1) C 3         | 1.76  | 0.54 | 0.051 |
| 9. BD* ( 2) C 3 - C 5  | /213. RY* ( 1) C 5         | 1.68  | 0.59 | 0.052 |
| 10. BD ( 1) C 3 - H 21 | /183. RY* ( 3) C 1         | 0.47  | 1.99 | 0.039 |
| 10. BD ( 1) C 3 - H 21 | /186. RY* ( 6) C 1         | 0.29  | 8.73 | 0.064 |
| 10. BD ( 1) C 3 - H 21 | /214. RY* ( 2) C 5         | 0.55  | 1.92 | 0.041 |
| 10. BD ( 1) C 3 - H 21 | /590. BD* ( 1) C 1 - C 2   | 3.08  | 0.94 | 0.068 |
| 10. BD ( 1) C 3 - H 21 | /592. BD* ( 1) C 1 - C 3   | 0.39  | 1.13 | 0.027 |
| 10. BD ( 1) C 3 - H 21 | /593. BD* ( 1) C 1 - O 20  | 0.94  | 0.79 | 0.034 |
| 10. BD ( 1) C 3 - H 21 | /600. BD* ( 1) C 5 - C 6   | 1.44  | 1.15 | 0.051 |
| 10. BD ( 1) C 3 - H 21 | /601. BD* ( 1) C 5 - H 31  | 0.29  | 0.97 | 0.021 |
| 11. BD ( 1) C 4 - C 6  | /190. RY* ( 2) C 2         | 0.77  | 2.34 | 0.054 |
| 11. BD ( 1) C 4 - C 6  | /214. RY* ( 2) C 5         | 0.39  | 2.05 | 0.036 |
| 11. BD ( 1) C 4 - C 6  | /245. RY* ( 1) C 9         | 0.62  | 1.89 | 0.044 |
| 11. BD ( 1) C 4 - C 6  | /261. RY* ( 1) N 11        | 0.54  | 1.52 | 0.036 |
| 11. BD ( 1) C 4 - C 6  | /594. BD* ( 1) C 2 - C 4   | 1.44  | 1.27 | 0.054 |
| 11. BD ( 1) C 4 - C 6  | /595. BD* ( 1) C 2 - C 7   | 1.97  | 1.10 | 0.059 |
| 11. BD ( 1) C 4 - C 6  | /599. BD* ( 1) C 4 - C 9   | 0.77  | 1.11 | 0.037 |
| 11. BD ( 1) C 4 - C 6  | /600. BD* ( 1) C 5 - C 6   | 1.59  | 1.28 | 0.057 |
| 11. BD ( 1) C 4 - C 6  | /601. BD* ( 1) C 5 - H 31  | 1.43  | 1.10 | 0.050 |
| 11. BD ( 1) C 4 - C 6  | /602. BD* ( 1) C 6 - N 11  | 0.29  | 1.02 | 0.022 |
| 11. BD ( 1) C 4 - C 6  | /608. BD* ( 1) C 9 - C 10  | 0.71  | 1.31 | 0.039 |
| 12. BD ( 2) C 4 - C 6  | / 9. BD* ( 2) C 3 - C 5    | 6.14  | 0.22 | 0.066 |
| 12. BD ( 2) C 4 - C 6  | /189. RY* ( 1) C 2         | 0.90  | 0.86 | 0.036 |
| 12. BD ( 2) C 4 - C 6  | /213. RY* ( 1) C 5         | 1.21  | 0.81 | 0.041 |
| 12. BD ( 2) C 4 - C 6  | /246. RY* ( 2) C 9         | 0.57  | 0.88 | 0.029 |
| 12. BD ( 2) C 4 - C 6  | /591. BD* ( 2) C 1 - C 2   | 6.68  | 0.22 | 0.065 |
| 12. BD ( 2) C 4 - C 6  | /609. BD* ( 2) C 9 - C 10  | 7.25  | 0.31 | 0.066 |
| 12. BD ( 2) C 4 - C 6  | /612. BD* ( 1) N 11 - N 12 | 2.11  | 0.76 | 0.052 |
| 13. BD* ( 2) C 4 - C 6 | /189. RY* ( 1) C 2         | 0.77  | 0.62 | 0.038 |
| 13. BD* ( 2) C 4 - C 6 | /205. RY* ( 1) C 4         | 1.65  | 0.63 | 0.055 |
| 13. BD* ( 2) C 4 - C 6 | /213. RY* ( 1) C 5         | 1.37  | 0.58 | 0.048 |
| 13. BD* ( 2) C 4 - C 6 | /221. RY* ( 1) C 6         | 0.72  | 0.90 | 0.043 |
| 13. BD* ( 2) C 4 - C 6 | /222. RY* ( 2) C 6         | 0.27  | 1.25 | 0.032 |
| 13. BD* ( 2) C 4 - C 6 | /246. RY* ( 2) C 9         | 0.44  | 0.65 | 0.029 |
| 13. BD* ( 2) C 4 - C 6 | /604. BD* ( 2) C 7 - C 8   | 0.28  | 0.06 | 0.006 |
| 13. BD* ( 2) C 4 - C 6 | /609. BD* ( 2) C 9 - C 10  | 38.89 | 0.08 | 0.078 |
| 13. BD* ( 2) C 4 - C 6 | /612. BD* ( 1) N 11 - N 12 | 2.40  | 0.53 | 0.060 |
| 14. BD ( 1) C 4 - C 9  | /190. RY* ( 2) C 2         | 0.41  | 2.32 | 0.039 |
| 14. BD ( 1) C 4 - C 9  | /221. RY* ( 1) C 6         | 0.45  | 1.49 | 0.033 |
| 14. BD ( 1) C 4 - C 9  | /222. RY* ( 2) C 6         | 0.80  | 1.83 | 0.049 |
| 14. BD ( 1) C 4 - C 9  | /254. RY* ( 2) C 10        | 0.31  | 2.01 | 0.032 |
| 14. BD ( 1) C 4 - C 9  | /255. RY* ( 3) C 10        | 0.74  | 2.01 | 0.049 |
| 14. BD ( 1) C 4 - C 9  | /590. BD* ( 1) C 1 - C 2   | 2.40  | 1.05 | 0.063 |
| 14. BD ( 1) C 4 - C 9  | /594. BD* ( 1) C 2 - C 4   | 1.72  | 1.25 | 0.059 |
| 14. BD ( 1) C 4 - C 9  | /598. BD* ( 1) C 4 - C 6   | 0.75  | 1.08 | 0.036 |
| 14. BD ( 1) C 4 - C 9  | /600. BD* ( 1) C 5 - C 6   | 1.02  | 1.26 | 0.045 |
| 14. BD ( 1) C 4 - C 9  | /608. BD* ( 1) C 9 - C 10  | 1.28  | 1.29 | 0.052 |
| 14. BD ( 1) C 4 - C 9  | /610. BD* ( 1) C 9 - H 24  | 0.34  | 1.10 | 0.025 |
| 14. BD ( 1) C 4 - C 9  | /611. BD* ( 1) C 10 - H 25 | 1.45  | 1.08 | 0.050 |
| 15. BD ( 1) C 5 - C 6  | /199. RY* ( 3) C 3         | 0.65  | 2.13 | 0.047 |
| 15. BD ( 1) C 5 - C 6  | /207. RY* ( 3) C 4         | 0.70  | 2.36 | 0.051 |
| 15. BD ( 1) C 5 - C 6  | /261. RY* ( 1) N 11        | 0.70  | 1.63 | 0.043 |
| 15. BD ( 1) C 5 - C 6  | /596. BD* ( 1) C 3 - C 5   | 0.94  | 1.22 | 0.043 |
| 15. BD ( 1) C 5 - C 6  | /597. BD* ( 1) C 3 - H 21  | 0.59  | 1.19 | 0.034 |
| 15. BD ( 1) C 5 - C 6  | /598. BD* ( 1) C 4 - C 6   | 1.65  | 1.21 | 0.057 |
| 15. BD ( 1) C 5 - C 6  | /599. BD* ( 1) C 4 - C 9   | 1.09  | 1.22 | 0.046 |
| 15. BD ( 1) C 5 - C 6  | /601. BD* ( 1) C 5 - H 31  | 0.81  | 1.21 | 0.040 |
| 15. BD ( 1) C 5 - C 6  | /602. BD* ( 1) C 6 - N 11  | 0.71  | 1.13 | 0.036 |
| 15. BD ( 1) C 5 - C 6  | /612. BD* ( 1) N 11 - N 12 | 0.51  | 1.24 | 0.032 |
| 16. BD ( 1) C 5 - H 31 | /198. RY* ( 2) C 3         | 0.45  | 1.85 | 0.037 |
| 16. BD ( 1) C 5 - H 31 | /221. RY* ( 1) C 6         | 0.42  | 1.36 | 0.030 |
| 16. BD ( 1) C 5 - H 31 | /222. RY* ( 2) C 6         | 0.79  | 1.71 | 0.047 |
| 16. BD ( 1) C 5 - H 31 | /592. BD* ( 1) C 1 - C 3   | 1.36  | 1.12 | 0.049 |
| 16. BD ( 1) C 5 - H 31 | /597. BD* ( 1) C 3 - H 21  | 0.29  | 0.94 | 0.021 |
| 16. BD ( 1) C 5 - H 31 | /598. BD* ( 1) C 4 - C 6   | 3.32  | 0.96 | 0.072 |
| 16. BD ( 1) C 5 - H 31 | /600. BD* ( 1) C 5 - C 6   | 0.71  | 1.14 | 0.036 |
| 16. BD ( 1) C 5 - H 31 | /602. BD* ( 1) C 6 - N 11  | 0.69  | 0.88 | 0.031 |
| 17. BD ( 1) C 6 - N 11 | /207. RY* ( 3) C 4         | 0.68  | 2.39 | 0.051 |

|                         |                            |      |      |       |
|-------------------------|----------------------------|------|------|-------|
| 17. BD ( 1) C 6 - N 11  | /214. RY* ( 2) C 5         | 0.60 | 2.19 | 0.046 |
| 17. BD ( 1) C 6 - N 11  | /269. RY* ( 1) N 12        | 0.46 | 1.58 | 0.034 |
| 17. BD ( 1) C 6 - N 11  | /270. RY* ( 2) N 12        | 0.65 | 1.61 | 0.041 |
| 17. BD ( 1) C 6 - N 11  | /594. BD* ( 1) C 2 - C 4   | 0.72 | 1.41 | 0.040 |
| 17. BD ( 1) C 6 - N 11  | /596. BD* ( 1) C 3 - C 5   | 1.22 | 1.25 | 0.049 |
| 17. BD ( 1) C 6 - N 11  | /598. BD* ( 1) C 4 - C 6   | 0.46 | 1.24 | 0.030 |
| 17. BD ( 1) C 6 - N 11  | /600. BD* ( 1) C 5 - C 6   | 0.86 | 1.42 | 0.044 |
| 17. BD ( 1) C 6 - N 11  | /612. BD* ( 1) N 11 - N 12 | 0.60 | 1.27 | 0.035 |
| 17. BD ( 1) C 6 - N 11  | /613. BD* ( 1) N 12 - C 13 | 2.81 | 1.14 | 0.072 |
| 18. BD ( 1) C 7 - C 8   | /190. RY* ( 2) C 2         | 0.49 | 2.43 | 0.044 |
| 18. BD ( 1) C 7 - C 8   | /191. RY* ( 3) C 2         | 0.45 | 2.20 | 0.040 |
| 18. BD ( 1) C 7 - C 8   | /254. RY* ( 2) C 10        | 0.44 | 2.12 | 0.038 |
| 18. BD ( 1) C 7 - C 8   | /255. RY* ( 3) C 10        | 0.39 | 2.13 | 0.037 |
| 18. BD ( 1) C 7 - C 8   | /590. BD* ( 1) C 1 - C 2   | 1.26 | 1.16 | 0.049 |
| 18. BD ( 1) C 7 - C 8   | /595. BD* ( 1) C 2 - C 7   | 1.35 | 1.19 | 0.051 |
| 18. BD ( 1) C 7 - C 8   | /605. BD* ( 1) C 7 - H 22  | 0.80 | 1.19 | 0.039 |
| 18. BD ( 1) C 7 - C 8   | /606. BD* ( 1) C 8 - C 10  | 0.94 | 1.21 | 0.043 |
| 18. BD ( 1) C 7 - C 8   | /607. BD* ( 1) C 8 - H 23  | 0.65 | 1.19 | 0.035 |
| 18. BD ( 1) C 7 - C 8   | /611. BD* ( 1) C 10 - H 25 | 0.78 | 1.20 | 0.039 |
| 19. BD ( 2) C 7 - C 8   | /189. RY* ( 1) C 2         | 0.40 | 0.86 | 0.024 |
| 19. BD ( 2) C 7 - C 8   | /253. RY* ( 1) C 10        | 0.73 | 0.78 | 0.031 |
| 19. BD ( 2) C 7 - C 8   | /591. BD* ( 2) C 1 - C 2   | 3.47 | 0.23 | 0.049 |
| 19. BD ( 2) C 7 - C 8   | /604. BD* ( 2) C 7 - C 8   | 0.36 | 0.30 | 0.015 |
| 19. BD ( 2) C 7 - C 8   | /609. BD* ( 2) C 9 - C 10  | 4.59 | 0.32 | 0.054 |
| 20. BD ( 1) C 7 - H 22  | /190. RY* ( 2) C 2         | 0.67 | 2.20 | 0.049 |
| 20. BD ( 1) C 7 - H 22  | /238. RY* ( 2) C 8         | 0.72 | 1.86 | 0.046 |
| 20. BD ( 1) C 7 - H 22  | /594. BD* ( 1) C 2 - C 4   | 1.59 | 1.13 | 0.054 |
| 20. BD ( 1) C 7 - H 22  | /603. BD* ( 1) C 7 - C 8   | 0.65 | 1.16 | 0.035 |
| 20. BD ( 1) C 7 - H 22  | /606. BD* ( 1) C 8 - C 10  | 2.59 | 0.99 | 0.064 |
| 20. BD ( 1) C 7 - H 22  | /607. BD* ( 1) C 8 - H 23  | 0.46 | 0.96 | 0.027 |
| 21. BD ( 1) C 8 - C 10  | /231. RY* ( 3) C 7         | 0.94 | 1.78 | 0.052 |
| 21. BD ( 1) C 8 - C 10  | /247. RY* ( 3) C 9         | 0.92 | 1.77 | 0.051 |
| 21. BD ( 1) C 8 - C 10  | /603. BD* ( 1) C 7 - C 8   | 1.05 | 1.29 | 0.047 |
| 21. BD ( 1) C 8 - C 10  | /605. BD* ( 1) C 7 - H 22  | 1.66 | 1.09 | 0.054 |
| 21. BD ( 1) C 8 - C 10  | /608. BD* ( 1) C 9 - C 10  | 1.11 | 1.30 | 0.048 |
| 21. BD ( 1) C 8 - C 10  | /610. BD* ( 1) C 9 - H 24  | 1.66 | 1.11 | 0.054 |
| 22. BD ( 1) C 8 - H 23  | /229. RY* ( 1) C 7         | 0.44 | 1.38 | 0.031 |
| 22. BD ( 1) C 8 - H 23  | /230. RY* ( 2) C 7         | 0.45 | 1.38 | 0.032 |
| 22. BD ( 1) C 8 - H 23  | /254. RY* ( 2) C 10        | 0.58 | 1.88 | 0.042 |
| 22. BD ( 1) C 8 - H 23  | /595. BD* ( 1) C 2 - C 7   | 3.22 | 0.95 | 0.070 |
| 22. BD ( 1) C 8 - H 23  | /603. BD* ( 1) C 7 - C 8   | 0.56 | 1.16 | 0.032 |
| 22. BD ( 1) C 8 - H 23  | /605. BD* ( 1) C 7 - H 22  | 0.57 | 0.96 | 0.030 |
| 22. BD ( 1) C 8 - H 23  | /608. BD* ( 1) C 9 - C 10  | 1.32 | 1.17 | 0.050 |
| 22. BD ( 1) C 8 - H 23  | /611. BD* ( 1) C 10 - H 25 | 0.26 | 0.96 | 0.020 |
| 23. BD ( 1) C 9 - C 10  | /206. RY* ( 2) C 4         | 0.63 | 2.34 | 0.048 |
| 23. BD ( 1) C 9 - C 10  | /207. RY* ( 3) C 4         | 0.34 | 2.33 | 0.036 |
| 23. BD ( 1) C 9 - C 10  | /238. RY* ( 2) C 8         | 0.38 | 2.08 | 0.036 |
| 23. BD ( 1) C 9 - C 10  | /239. RY* ( 3) C 8         | 0.38 | 2.09 | 0.036 |
| 23. BD ( 1) C 9 - C 10  | /598. BD* ( 1) C 4 - C 6   | 1.20 | 1.18 | 0.048 |
| 23. BD ( 1) C 9 - C 10  | /599. BD* ( 1) C 4 - C 9   | 1.33 | 1.20 | 0.051 |
| 23. BD ( 1) C 9 - C 10  | /606. BD* ( 1) C 8 - C 10  | 1.02 | 1.20 | 0.044 |
| 23. BD ( 1) C 9 - C 10  | /607. BD* ( 1) C 8 - H 23  | 0.76 | 1.18 | 0.038 |
| 23. BD ( 1) C 9 - C 10  | /610. BD* ( 1) C 9 - H 24  | 0.87 | 1.21 | 0.041 |
| 23. BD ( 1) C 9 - C 10  | /611. BD* ( 1) C 10 - H 25 | 0.76 | 1.19 | 0.038 |
| 24. BD ( 2) C 9 - C 10  | / 13. BD* ( 2) C 4 - C 6   | 3.31 | 0.23 | 0.049 |
| 24. BD ( 2) C 9 - C 10  | /205. RY* ( 1) C 4         | 0.35 | 0.86 | 0.022 |
| 24. BD ( 2) C 9 - C 10  | /237. RY* ( 1) C 8         | 0.68 | 0.76 | 0.029 |
| 24. BD ( 2) C 9 - C 10  | /604. BD* ( 2) C 7 - C 8   | 4.88 | 0.29 | 0.055 |
| 24. BD ( 2) C 9 - C 10  | /609. BD* ( 2) C 9 - C 10  | 0.41 | 0.30 | 0.016 |
| 25. BD ( 1) C 9 - H 24  | /206. RY* ( 2) C 4         | 0.66 | 2.10 | 0.047 |
| 25. BD ( 1) C 9 - H 24  | /254. RY* ( 2) C 10        | 0.66 | 1.87 | 0.045 |
| 25. BD ( 1) C 9 - H 24  | /594. BD* ( 1) C 2 - C 4   | 1.72 | 1.12 | 0.055 |
| 25. BD ( 1) C 9 - H 24  | /606. BD* ( 1) C 8 - C 10  | 2.69 | 0.97 | 0.065 |
| 25. BD ( 1) C 9 - H 24  | /608. BD* ( 1) C 9 - C 10  | 0.80 | 1.16 | 0.039 |
| 25. BD ( 1) C 9 - H 24  | /611. BD* ( 1) C 10 - H 25 | 0.47 | 0.95 | 0.027 |
| 26. BD ( 1) C 10 - H 25 | /238. RY* ( 2) C 8         | 0.54 | 1.85 | 0.040 |
| 26. BD ( 1) C 10 - H 25 | /245. RY* ( 1) C 9         | 0.68 | 1.74 | 0.044 |
| 26. BD ( 1) C 10 - H 25 | /599. BD* ( 1) C 4 - C 9   | 3.16 | 0.96 | 0.070 |
| 26. BD ( 1) C 10 - H 25 | /603. BD* ( 1) C 7 - C 8   | 1.32 | 1.15 | 0.049 |
| 26. BD ( 1) C 10 - H 25 | /607. BD* ( 1) C 8 - H 23  | 0.26 | 0.95 | 0.020 |
| 26. BD ( 1) C 10 - H 25 | /608. BD* ( 1) C 9 - C 10  | 0.70 | 1.16 | 0.036 |

|                         |                            |      |      |       |
|-------------------------|----------------------------|------|------|-------|
| 26. BD ( 1) C 10 - H 25 | /610. BD* ( 1) C 9 - H 24  | 0.47 | 0.97 | 0.027 |
| 27. BD ( 1) N 11 - N 12 | /221. RY* ( 1) C 6         | 1.02 | 1.85 | 0.055 |
| 27. BD ( 1) N 11 - N 12 | /277. RY* ( 1) C 13        | 0.74 | 2.11 | 0.050 |
| 27. BD ( 1) N 11 - N 12 | /278. RY* ( 2) C 13        | 0.79 | 2.42 | 0.055 |
| 27. BD ( 1) N 11 - N 12 | /602. BD* ( 1) C 6 - N 11  | 0.61 | 1.36 | 0.037 |
| 27. BD ( 1) N 11 - N 12 | /613. BD* ( 1) N 12 - C 13 | 0.41 | 1.35 | 0.030 |
| 27. BD ( 1) N 11 - N 12 | /614. BD* ( 1) C 13 - C 14 | 0.56 | 1.43 | 0.036 |
| 28. BD ( 1) N 12 - C 13 | /221. RY* ( 1) C 6         | 0.31 | 1.65 | 0.029 |
| 28. BD ( 1) N 12 - C 13 | /262. RY* ( 2) N 11        | 0.89 | 2.73 | 0.063 |
| 28. BD ( 1) N 12 - C 13 | /263. RY* ( 3) N 11        | 0.63 | 2.14 | 0.047 |
| 28. BD ( 1) N 12 - C 13 | /286. RY* ( 2) C 14        | 0.36 | 2.11 | 0.035 |
| 28. BD ( 1) N 12 - C 13 | /293. RY* ( 1) C 15        | 0.41 | 1.98 | 0.036 |
| 28. BD ( 1) N 12 - C 13 | /602. BD* ( 1) C 6 - N 11  | 2.43 | 1.17 | 0.068 |
| 28. BD ( 1) N 12 - C 13 | /614. BD* ( 1) C 13 - C 14 | 0.30 | 1.24 | 0.024 |
| 28. BD ( 1) N 12 - C 13 | /615. BD* ( 1) C 13 - C 15 | 0.95 | 1.40 | 0.046 |
| 28. BD ( 1) N 12 - C 13 | /617. BD* ( 1) C 14 - C 16 | 0.40 | 1.44 | 0.030 |
| 28. BD ( 1) N 12 - C 13 | /619. BD* ( 1) C 15 - C 17 | 1.19 | 1.24 | 0.049 |
| 29. BD ( 1) C 13 - C 14 | /269. RY* ( 1) N 12        | 0.34 | 1.45 | 0.028 |
| 29. BD ( 1) C 13 - C 14 | /295. RY* ( 3) C 15        | 0.34 | 2.17 | 0.034 |
| 29. BD ( 1) C 13 - C 14 | /296. RY* ( 4) C 15        | 0.25 | 1.66 | 0.026 |
| 29. BD ( 1) C 13 - C 14 | /302. RY* ( 2) C 16        | 0.38 | 1.88 | 0.034 |
| 29. BD ( 1) C 13 - C 14 | /303. RY* ( 3) C 16        | 0.69 | 2.03 | 0.048 |
| 29. BD ( 1) C 13 - C 14 | /612. BD* ( 1) N 11 - N 12 | 1.60 | 1.13 | 0.054 |
| 29. BD ( 1) C 13 - C 14 | /613. BD* ( 1) N 12 - C 13 | 0.38 | 1.01 | 0.025 |
| 29. BD ( 1) C 13 - C 14 | /615. BD* ( 1) C 13 - C 15 | 1.81 | 1.25 | 0.060 |
| 29. BD ( 1) C 13 - C 14 | /617. BD* ( 1) C 14 - C 16 | 0.89 | 1.29 | 0.043 |
| 29. BD ( 1) C 13 - C 14 | /620. BD* ( 1) C 15 - O 19 | 2.64 | 0.97 | 0.064 |
| 29. BD ( 1) C 13 - C 14 | /622. BD* ( 1) C 16 - H 27 | 1.41 | 1.10 | 0.050 |
| 30. BD ( 1) C 13 - C 15 | /271. RY* ( 3) N 12        | 0.30 | 1.89 | 0.030 |
| 30. BD ( 1) C 13 - C 15 | /286. RY* ( 2) C 14        | 0.43 | 2.08 | 0.038 |
| 30. BD ( 1) C 13 - C 15 | /310. RY* ( 2) C 17        | 0.63 | 2.10 | 0.046 |
| 30. BD ( 1) C 13 - C 15 | /613. BD* ( 1) N 12 - C 13 | 0.68 | 1.13 | 0.035 |
| 30. BD ( 1) C 13 - C 15 | /614. BD* ( 1) C 13 - C 14 | 1.77 | 1.21 | 0.059 |
| 30. BD ( 1) C 13 - C 15 | /618. BD* ( 1) C 14 - H 26 | 0.55 | 1.21 | 0.033 |
| 30. BD ( 1) C 13 - C 15 | /619. BD* ( 1) C 15 - C 17 | 1.43 | 1.21 | 0.053 |
| 30. BD ( 1) C 13 - C 15 | /620. BD* ( 1) C 15 - O 19 | 0.34 | 1.09 | 0.024 |
| 30. BD ( 1) C 13 - C 15 | /624. BD* ( 1) C 17 - H 28 | 0.57 | 1.22 | 0.033 |
| 31. BD ( 2) C 13 - C 15 | / 36. BD* ( 1) C 16 - C 17 | 0.50 | 0.13 | 0.053 |
| 31. BD ( 2) C 13 - C 15 | /270. RY* ( 2) N 12        | 0.26 | 1.12 | 0.022 |
| 31. BD ( 2) C 13 - C 15 | /285. RY* ( 1) C 14        | 0.76 | 0.80 | 0.031 |
| 31. BD ( 2) C 13 - C 15 | /309. RY* ( 1) C 17        | 1.19 | 0.81 | 0.039 |
| 31. BD ( 2) C 13 - C 15 | /325. RY* ( 1) O 19        | 0.37 | 1.40 | 0.029 |
| 31. BD ( 2) C 13 - C 15 | /616. BD* ( 2) C 13 - C 15 | 0.48 | 0.32 | 0.017 |
| 32. BD ( 1) C 14 - C 16 | /278. RY* ( 2) C 13        | 0.99 | 2.19 | 0.059 |
| 32. BD ( 1) C 14 - C 16 | /317. RY* ( 1) C 18        | 0.54 | 1.95 | 0.041 |
| 32. BD ( 1) C 14 - C 16 | /319. RY* ( 3) C 18        | 0.43 | 2.06 | 0.038 |
| 32. BD ( 1) C 14 - C 16 | /613. BD* ( 1) N 12 - C 13 | 1.41 | 1.11 | 0.050 |
| 32. BD ( 1) C 14 - C 16 | /614. BD* ( 1) C 13 - C 14 | 0.86 | 1.20 | 0.041 |
| 32. BD ( 1) C 14 - C 16 | /618. BD* ( 1) C 14 - H 26 | 0.66 | 1.19 | 0.035 |
| 32. BD ( 1) C 14 - C 16 | /621. BD* ( 1) C 16 - C 18 | 0.85 | 1.22 | 0.041 |
| 32. BD ( 1) C 14 - C 16 | /622. BD* ( 1) C 16 - H 27 | 0.54 | 1.20 | 0.032 |
| 32. BD ( 1) C 14 - C 16 | /625. BD* ( 1) C 18 - H 29 | 0.84 | 1.21 | 0.040 |
| 33. BD ( 1) C 14 - H 26 | /277. RY* ( 1) C 13        | 0.43 | 1.63 | 0.033 |
| 33. BD ( 1) C 14 - H 26 | /302. RY* ( 2) C 16        | 0.61 | 1.73 | 0.041 |
| 33. BD ( 1) C 14 - H 26 | /613. BD* ( 1) N 12 - C 13 | 0.37 | 0.86 | 0.023 |
| 33. BD ( 1) C 14 - H 26 | /615. BD* ( 1) C 13 - C 15 | 1.75 | 1.11 | 0.056 |
| 33. BD ( 1) C 14 - H 26 | /617. BD* ( 1) C 14 - C 16 | 0.50 | 1.15 | 0.030 |
| 33. BD ( 1) C 14 - H 26 | /621. BD* ( 1) C 16 - C 18 | 2.72 | 0.98 | 0.065 |
| 33. BD ( 1) C 14 - H 26 | /622. BD* ( 1) C 16 - H 27 | 0.54 | 0.96 | 0.029 |
| 34. BD ( 1) C 15 - C 17 | /277. RY* ( 1) C 13        | 0.57 | 1.78 | 0.040 |
| 34. BD ( 1) C 15 - C 17 | /317. RY* ( 1) C 18        | 0.34 | 1.85 | 0.032 |
| 34. BD ( 1) C 15 - C 17 | /319. RY* ( 3) C 18        | 0.78 | 1.95 | 0.050 |
| 34. BD ( 1) C 15 - C 17 | /613. BD* ( 1) N 12 - C 13 | 2.80 | 1.01 | 0.067 |
| 34. BD ( 1) C 15 - C 17 | /615. BD* ( 1) C 13 - C 15 | 1.64 | 1.25 | 0.057 |
| 34. BD ( 1) C 15 - C 17 | /623. BD* ( 1) C 17 - C 18 | 0.96 | 1.30 | 0.045 |
| 34. BD ( 1) C 15 - C 17 | /625. BD* ( 1) C 18 - H 29 | 1.56 | 1.11 | 0.053 |
| 35. BD ( 1) C 15 - O 19 | /277. RY* ( 1) C 13        | 0.27 | 1.97 | 0.029 |
| 35. BD ( 1) C 15 - O 19 | /293. RY* ( 1) C 15        | 0.50 | 2.02 | 0.040 |
| 35. BD ( 1) C 15 - O 19 | /614. BD* ( 1) C 13 - C 14 | 1.27 | 1.29 | 0.051 |
| 35. BD ( 1) C 15 - O 19 | /615. BD* ( 1) C 13 - C 15 | 0.67 | 1.45 | 0.039 |
| 35. BD ( 1) C 15 - O 19 | /623. BD* ( 1) C 17 - C 18 | 0.47 | 1.49 | 0.034 |



|                          |                            |       |       |       |
|--------------------------|----------------------------|-------|-------|-------|
| 36. BD* ( 1) C 16 - C 17 | /285. RY* ( 1) C 14        | 1.51  | 0.67  | 0.040 |
| 36. BD* ( 1) C 16 - C 17 | /294. RY* ( 2) C 15        | 0.28  | 0.81  | 0.019 |
| 36. BD* ( 1) C 16 - C 17 | /616. BD* ( 2) C 13 - C 15 | 5.86  | 0.19  | 0.047 |
| 37. BD ( 1) C 16 - C 17  | /285. RY* ( 1) C 14        | 0.75  | 0.63  | 0.037 |
| 37. BD ( 1) C 16 - C 17  | /318. RY* ( 2) C 18        | 1.55  | 0.65  | 0.055 |
| 37. BD ( 1) C 16 - C 17  | /616. BD* ( 2) C 13 - C 15 | 10.59 | 0.15  | 0.058 |
| 38. BD ( 1) C 16 - C 18  | /287. RY* ( 3) C 14        | 0.84  | 1.93  | 0.051 |
| 38. BD ( 1) C 16 - C 18  | /311. RY* ( 3) C 17        | 0.84  | 1.90  | 0.051 |
| 38. BD ( 1) C 16 - C 18  | /617. BD* ( 1) C 14 - C 16 | 0.90  | 1.28  | 0.043 |
| 38. BD ( 1) C 16 - C 18  | /618. BD* ( 1) C 14 - H 26 | 1.59  | 1.08  | 0.053 |
| 38. BD ( 1) C 16 - C 18  | /623. BD* ( 1) C 17 - C 18 | 1.07  | 1.29  | 0.047 |
| 38. BD ( 1) C 16 - C 18  | /624. BD* ( 1) C 17 - H 28 | 1.54  | 1.09  | 0.052 |
| 38. BD ( 1) C 16 - C 18  | /625. BD* ( 1) C 18 - H 29 | 0.27  | 1.10  | 0.022 |
| 39. BD ( 1) C 16 - H 27  | /286. RY* ( 2) C 14        | 0.76  | 1.82  | 0.047 |
| 39. BD ( 1) C 16 - H 27  | /317. RY* ( 1) C 18        | 0.65  | 1.71  | 0.042 |
| 39. BD ( 1) C 16 - H 27  | /614. BD* ( 1) C 13 - C 14 | 3.00  | 0.95  | 0.068 |
| 39. BD ( 1) C 16 - H 27  | /617. BD* ( 1) C 14 - C 16 | 0.43  | 1.15  | 0.028 |
| 39. BD ( 1) C 16 - H 27  | /618. BD* ( 1) C 14 - H 26 | 0.54  | 0.95  | 0.029 |
| 39. BD ( 1) C 16 - H 27  | /623. BD* ( 1) C 17 - C 18 | 1.45  | 1.16  | 0.052 |
| 39. BD ( 1) C 16 - H 27  | /625. BD* ( 1) C 18 - H 29 | 0.25  | 0.97  | 0.020 |
| 40. BD ( 1) C 17 - C 18  | /293. RY* ( 1) C 15        | 0.59  | 1.93  | 0.043 |
| 40. BD ( 1) C 17 - C 18  | /295. RY* ( 3) C 15        | 0.47  | 2.26  | 0.041 |
| 40. BD ( 1) C 17 - C 18  | /302. RY* ( 2) C 16        | 0.51  | 1.97  | 0.040 |
| 40. BD ( 1) C 17 - C 18  | /303. RY* ( 3) C 16        | 0.38  | 2.13  | 0.036 |
| 40. BD ( 1) C 17 - C 18  | /619. BD* ( 1) C 15 - C 17 | 0.77  | 1.19  | 0.038 |
| 40. BD ( 1) C 17 - C 18  | /620. BD* ( 1) C 15 - O 19 | 1.23  | 1.06  | 0.046 |
| 40. BD ( 1) C 17 - C 18  | /621. BD* ( 1) C 16 - C 18 | 1.00  | 1.22  | 0.044 |
| 40. BD ( 1) C 17 - C 18  | /622. BD* ( 1) C 16 - H 27 | 0.73  | 1.20  | 0.037 |
| 40. BD ( 1) C 17 - C 18  | /624. BD* ( 1) C 17 - H 28 | 0.75  | 1.19  | 0.038 |
| 40. BD ( 1) C 17 - C 18  | /625. BD* ( 1) C 18 - H 29 | 0.70  | 1.20  | 0.037 |
| 41. BD ( 1) C 17 - H 28  | /293. RY* ( 1) C 15        | 0.37  | 1.69  | 0.032 |
| 41. BD ( 1) C 17 - H 28  | /317. RY* ( 1) C 18        | 0.67  | 1.71  | 0.043 |
| 41. BD ( 1) C 17 - H 28  | /615. BD* ( 1) C 13 - C 15 | 1.61  | 1.11  | 0.054 |
| 41. BD ( 1) C 17 - H 28  | /620. BD* ( 1) C 15 - O 19 | 0.53  | 0.82  | 0.027 |
| 41. BD ( 1) C 17 - H 28  | /621. BD* ( 1) C 16 - C 18 | 2.90  | 0.98  | 0.067 |
| 41. BD ( 1) C 17 - H 28  | /623. BD* ( 1) C 17 - C 18 | 0.61  | 1.16  | 0.034 |
| 41. BD ( 1) C 17 - H 28  | /625. BD* ( 1) C 18 - H 29 | 0.52  | 0.96  | 0.028 |
| 42. BD ( 1) C 18 - H 29  | /302. RY* ( 2) C 16        | 0.59  | 1.73  | 0.041 |
| 42. BD ( 1) C 18 - H 29  | /310. RY* ( 2) C 17        | 0.75  | 1.83  | 0.047 |
| 42. BD ( 1) C 18 - H 29  | /617. BD* ( 1) C 14 - C 16 | 1.30  | 1.15  | 0.049 |
| 42. BD ( 1) C 18 - H 29  | /619. BD* ( 1) C 15 - C 17 | 2.84  | 0.95  | 0.066 |
| 42. BD ( 1) C 18 - H 29  | /623. BD* ( 1) C 17 - C 18 | 0.61  | 1.16  | 0.034 |
| 42. BD ( 1) C 18 - H 29  | /624. BD* ( 1) C 17 - H 28 | 0.48  | 0.95  | 0.027 |
| 43. BD ( 1) O 20 - H 30  | /181. RY* ( 1) C 1         | 0.64  | 1.49  | 0.039 |
| 43. BD ( 1) O 20 - H 30  | /182. RY* ( 2) C 1         | 0.84  | 1.65  | 0.047 |
| 43. BD ( 1) O 20 - H 30  | /592. BD* ( 1) C 1 - C 3   | 1.59  | 1.34  | 0.058 |
| 89. CR ( 1) C 1          | /190. RY* ( 2) C 2         | 0.56  | 11.81 | 0.102 |
| 89. CR ( 1) C 1          | /199. RY* ( 3) C 3         | 1.08  | 11.49 | 0.140 |
| 89. CR ( 1) C 1          | /592. BD* ( 1) C 1 - C 3   | 0.92  | 10.73 | 0.126 |
| 89. CR ( 1) C 1          | /593. BD* ( 1) C 1 - O 20  | 0.66  | 10.39 | 0.106 |
| 89. CR ( 1) C 1          | /594. BD* ( 1) C 2 - C 4   | 0.29  | 10.74 | 0.071 |
| 89. CR ( 1) C 1          | /595. BD* ( 1) C 2 - C 7   | 0.31  | 10.57 | 0.073 |
| 89. CR ( 1) C 1          | /596. BD* ( 1) C 3 - C 5   | 0.40  | 10.58 | 0.082 |
| 90. CR ( 1) C 2          | /182. RY* ( 2) C 1         | 0.32  | 10.98 | 0.075 |
| 90. CR ( 1) C 2          | /207. RY* ( 3) C 4         | 1.15  | 11.66 | 0.146 |
| 90. CR ( 1) C 2          | /231. RY* ( 3) C 7         | 0.51  | 11.20 | 0.096 |
| 90. CR ( 1) C 2          | /592. BD* ( 1) C 1 - C 3   | 0.27  | 10.67 | 0.069 |
| 90. CR ( 1) C 2          | /594. BD* ( 1) C 2 - C 4   | 0.60  | 10.68 | 0.101 |
| 90. CR ( 1) C 2          | /598. BD* ( 1) C 4 - C 6   | 0.53  | 10.51 | 0.096 |
| 90. CR ( 1) C 2          | /599. BD* ( 1) C 4 - C 9   | 0.46  | 10.53 | 0.088 |
| 90. CR ( 1) C 2          | /603. BD* ( 1) C 7 - C 8   | 0.27  | 10.71 | 0.068 |
| 91. CR ( 1) C 3          | /183. RY* ( 3) C 1         | 1.52  | 11.51 | 0.167 |
| 91. CR ( 1) C 3          | /216. RY* ( 4) C 5         | 0.47  | 11.20 | 0.092 |
| 91. CR ( 1) C 3          | /342. RY* ( 2) H 21        | 0.29  | 12.28 | 0.075 |
| 91. CR ( 1) C 3          | /590. BD* ( 1) C 1 - C 2   | 0.59  | 10.46 | 0.100 |
| 91. CR ( 1) C 3          | /592. BD* ( 1) C 1 - C 3   | 0.29  | 10.66 | 0.070 |
| 91. CR ( 1) C 3          | /593. BD* ( 1) C 1 - O 20  | 0.36  | 10.32 | 0.077 |
| 91. CR ( 1) C 3          | /600. BD* ( 1) C 5 - C 6   | 0.31  | 10.68 | 0.073 |
| 92. CR ( 1) C 4          | /191. RY* ( 3) C 2         | 1.21  | 11.51 | 0.149 |
| 92. CR ( 1) C 4          | /223. RY* ( 3) C 6         | 0.79  | 11.16 | 0.118 |
| 92. CR ( 1) C 4          | /247. RY* ( 3) C 9         | 0.57  | 11.18 | 0.101 |

|      |    |   |    |   |    |       |     |   |    |   |        |    |      |       |       |
|------|----|---|----|---|----|-------|-----|---|----|---|--------|----|------|-------|-------|
| 92.  | CR | ( | 1) | C | 4  | /590. | BD* | ( | 1) | C | 1 - C  | 2  | 0.51 | 10.47 | 0.094 |
| 92.  | CR | ( | 1) | C | 4  | /594. | BD* | ( | 1) | C | 2 - C  | 4  | 0.52 | 10.67 | 0.095 |
| 92.  | CR | ( | 1) | C | 4  | /595. | BD* | ( | 1) | C | 2 - C  | 7  | 0.46 | 10.50 | 0.088 |
| 92.  | CR | ( | 1) | C | 4  | /600. | BD* | ( | 1) | C | 5 - C  | 6  | 0.32 | 10.69 | 0.075 |
| 92.  | CR | ( | 1) | C | 4  | /602. | BD* | ( | 1) | C | 6 - N  | 11 | 0.27 | 10.42 | 0.067 |
| 92.  | CR | ( | 1) | C | 4  | /608. | BD* | ( | 1) | C | 9 - C  | 10 | 0.28 | 10.72 | 0.069 |
| 93.  | CR | ( | 1) | C | 5  | /222. | RY* | ( | 2) | C | 6      |    | 0.54 | 11.23 | 0.099 |
| 93.  | CR | ( | 1) | C | 5  | /223. | RY* | ( | 3) | C | 6      |    | 0.71 | 11.14 | 0.112 |
| 93.  | CR | ( | 1) | C | 5  | /224. | RY* | ( | 4) | C | 6      |    | 0.49 | 11.07 | 0.093 |
| 93.  | CR | ( | 1) | C | 5  | /362. | RY* | ( | 2) | H | 31     |    | 0.26 | 12.34 | 0.071 |
| 93.  | CR | ( | 1) | C | 5  | /592. | BD* | ( | 1) | C | 1 - C  | 3  | 0.29 | 10.64 | 0.070 |
| 93.  | CR | ( | 1) | C | 5  | /598. | BD* | ( | 1) | C | 4 - C  | 6  | 0.64 | 10.48 | 0.105 |
| 93.  | CR | ( | 1) | C | 5  | /600. | BD* | ( | 1) | C | 5 - C  | 6  | 0.43 | 10.67 | 0.086 |
| 93.  | CR | ( | 1) | C | 5  | /602. | BD* | ( | 1) | C | 6 - N  | 11 | 0.44 | 10.40 | 0.086 |
| 94.  | CR | ( | 1) | C | 6  | /206. | RY* | ( | 2) | C | 4      |    | 0.58 | 11.69 | 0.104 |
| 94.  | CR | ( | 1) | C | 6  | /215. | RY* | ( | 3) | C | 5      |    | 1.11 | 11.33 | 0.142 |
| 94.  | CR | ( | 1) | C | 6  | /594. | BD* | ( | 1) | C | 2 - C  | 4  | 0.33 | 10.70 | 0.076 |
| 94.  | CR | ( | 1) | C | 6  | /596. | BD* | ( | 1) | C | 3 - C  | 5  | 0.43 | 10.55 | 0.086 |
| 94.  | CR | ( | 1) | C | 6  | /599. | BD* | ( | 1) | C | 4 - C  | 9  | 0.31 | 10.55 | 0.072 |
| 94.  | CR | ( | 1) | C | 6  | /600. | BD* | ( | 1) | C | 5 - C  | 6  | 0.71 | 10.72 | 0.111 |
| 94.  | CR | ( | 1) | C | 6  | /612. | BD* | ( | 1) | N | 11 - N | 12 | 0.40 | 10.57 | 0.082 |
| 95.  | CR | ( | 1) | C | 7  | /190. | RY* | ( | 2) | C | 2      |    | 0.28 | 11.72 | 0.073 |
| 95.  | CR | ( | 1) | C | 7  | /239. | RY* | ( | 3) | C | 8      |    | 1.04 | 11.39 | 0.137 |
| 95.  | CR | ( | 1) | C | 7  | /344. | RY* | ( | 2) | H | 22     |    | 0.27 | 12.26 | 0.073 |
| 95.  | CR | ( | 1) | C | 7  | /590. | BD* | ( | 1) | C | 1 - C  | 2  | 0.33 | 10.45 | 0.075 |
| 95.  | CR | ( | 1) | C | 7  | /594. | BD* | ( | 1) | C | 2 - C  | 4  | 0.36 | 10.65 | 0.078 |
| 95.  | CR | ( | 1) | C | 7  | /603. | BD* | ( | 1) | C | 7 - C  | 8  | 0.38 | 10.68 | 0.081 |
| 95.  | CR | ( | 1) | C | 7  | /606. | BD* | ( | 1) | C | 8 - C  | 10 | 0.48 | 10.50 | 0.090 |
| 96.  | CR | ( | 1) | C | 8  | /231. | RY* | ( | 3) | C | 7      |    | 0.66 | 11.17 | 0.108 |
| 96.  | CR | ( | 1) | C | 8  | /232. | RY* | ( | 4) | C | 7      |    | 0.39 | 11.07 | 0.083 |
| 96.  | CR | ( | 1) | C | 8  | /255. | RY* | ( | 3) | C | 10     |    | 0.41 | 11.41 | 0.086 |
| 96.  | CR | ( | 1) | C | 8  | /346. | RY* | ( | 2) | H | 23     |    | 0.33 | 12.30 | 0.080 |
| 96.  | CR | ( | 1) | C | 8  | /595. | BD* | ( | 1) | C | 2 - C  | 7  | 0.60 | 10.48 | 0.101 |
| 96.  | CR | ( | 1) | C | 8  | /603. | BD* | ( | 1) | C | 7 - C  | 8  | 0.39 | 10.68 | 0.081 |
| 96.  | CR | ( | 1) | C | 8  | /608. | BD* | ( | 1) | C | 9 - C  | 10 | 0.28 | 10.69 | 0.069 |
| 97.  | CR | ( | 1) | C | 9  | /207. | RY* | ( | 3) | C | 4      |    | 0.36 | 11.62 | 0.082 |
| 97.  | CR | ( | 1) | C | 9  | /255. | RY* | ( | 3) | C | 10     |    | 1.00 | 11.40 | 0.135 |
| 97.  | CR | ( | 1) | C | 9  | /348. | RY* | ( | 2) | H | 24     |    | 0.27 | 12.36 | 0.072 |
| 97.  | CR | ( | 1) | C | 9  | /594. | BD* | ( | 1) | C | 2 - C  | 4  | 0.40 | 10.64 | 0.083 |
| 97.  | CR | ( | 1) | C | 9  | /598. | BD* | ( | 1) | C | 4 - C  | 6  | 0.32 | 10.47 | 0.074 |
| 97.  | CR | ( | 1) | C | 9  | /606. | BD* | ( | 1) | C | 8 - C  | 10 | 0.51 | 10.49 | 0.093 |
| 97.  | CR | ( | 1) | C | 9  | /608. | BD* | ( | 1) | C | 9 - C  | 10 | 0.40 | 10.68 | 0.083 |
| 98.  | CR | ( | 1) | C | 10 | /239. | RY* | ( | 3) | C | 8      |    | 0.38 | 11.38 | 0.083 |
| 98.  | CR | ( | 1) | C | 10 | /245. | RY* | ( | 1) | C | 9      |    | 0.37 | 11.26 | 0.082 |
| 98.  | CR | ( | 1) | C | 10 | /247. | RY* | ( | 3) | C | 9      |    | 0.56 | 11.15 | 0.099 |
| 98.  | CR | ( | 1) | C | 10 | /248. | RY* | ( | 4) | C | 9      |    | 0.54 | 11.13 | 0.098 |
| 98.  | CR | ( | 1) | C | 10 | /350. | RY* | ( | 2) | H | 25     |    | 0.33 | 12.30 | 0.080 |
| 98.  | CR | ( | 1) | C | 10 | /599. | BD* | ( | 1) | C | 4 - C  | 9  | 0.60 | 10.48 | 0.101 |
| 98.  | CR | ( | 1) | C | 10 | /603. | BD* | ( | 1) | C | 7 - C  | 8  | 0.29 | 10.67 | 0.070 |
| 98.  | CR | ( | 1) | C | 10 | /608. | BD* | ( | 1) | C | 9 - C  | 10 | 0.43 | 10.68 | 0.086 |
| 99.  | CR | ( | 1) | N | 11 | /221. | RY* | ( | 1) | C | 6      |    | 0.38 | 15.07 | 0.096 |
| 99.  | CR | ( | 1) | N | 11 | /222. | RY* | ( | 2) | C | 6      |    | 0.68 | 15.42 | 0.129 |
| 99.  | CR | ( | 1) | N | 11 | /271. | RY* | ( | 3) | N | 12     |    | 0.85 | 15.34 | 0.144 |
| 99.  | CR | ( | 1) | N | 11 | /598. | BD* | ( | 1) | C | 4 - C  | 6  | 0.27 | 14.67 | 0.080 |
| 99.  | CR | ( | 1) | N | 11 | /600. | BD* | ( | 1) | C | 5 - C  | 6  | 0.26 | 14.85 | 0.078 |
| 99.  | CR | ( | 1) | N | 11 | /613. | BD* | ( | 1) | N | 12 - C | 13 | 0.70 | 14.57 | 0.129 |
| 100. | CR | ( | 1) | N | 12 | /263. | RY* | ( | 3) | N | 11     |    | 0.94 | 15.60 | 0.153 |
| 100. | CR | ( | 1) | N | 12 | /277. | RY* | ( | 1) | C | 13     |    | 0.67 | 15.38 | 0.128 |
| 100. | CR | ( | 1) | N | 12 | /278. | RY* | ( | 2) | C | 13     |    | 0.33 | 15.69 | 0.091 |
| 100. | CR | ( | 1) | N | 12 | /602. | BD* | ( | 1) | C | 6 - N  | 11 | 0.60 | 14.62 | 0.120 |
| 100. | CR | ( | 1) | N | 12 | /615. | BD* | ( | 1) | C | 13 - C | 15 | 0.34 | 14.86 | 0.091 |
| 101. | CR | ( | 1) | C | 13 | /287. | RY* | ( | 3) | C | 14     |    | 0.42 | 11.39 | 0.088 |
| 101. | CR | ( | 1) | C | 13 | /293. | RY* | ( | 1) | C | 15     |    | 0.58 | 11.29 | 0.103 |
| 101. | CR | ( | 1) | C | 13 | /295. | RY* | ( | 3) | C | 15     |    | 0.97 | 11.62 | 0.134 |
| 101. | CR | ( | 1) | C | 13 | /612. | BD* | ( | 1) | N | 11 - N | 12 | 0.47 | 10.59 | 0.090 |
| 101. | CR | ( | 1) | C | 13 | /615. | BD* | ( | 1) | C | 13 - C | 15 | 0.62 | 10.71 | 0.104 |
| 101. | CR | ( | 1) | C | 13 | /619. | BD* | ( | 1) | C | 15 - C | 17 | 0.46 | 10.55 | 0.088 |
| 101. | CR | ( | 1) | C | 13 | /620. | BD* | ( | 1) | C | 15 - O | 19 | 0.41 | 10.42 | 0.083 |
| 102. | CR | ( | 1) | C | 14 | /277. | RY* | ( | 1) | C | 13     |    | 0.42 | 11.15 | 0.087 |
| 102. | CR | ( | 1) | C | 14 | /279. | RY* | ( | 3) | C | 13     |    | 0.31 | 10.95 | 0.074 |
| 102. | CR | ( | 1) | C | 14 | /303. | RY* | ( | 3) | C | 16     |    | 0.99 | 11.41 | 0.134 |

|                   |                            |       |       |       |
|-------------------|----------------------------|-------|-------|-------|
| 102. CR ( 1) C 14 | /352. RY* ( 2) H 26        | 0.30  | 12.30 | 0.076 |
| 102. CR ( 1) C 14 | /613. BD* ( 1) N 12 - C 13 | 0.26  | 10.38 | 0.066 |
| 102. CR ( 1) C 14 | /615. BD* ( 1) C 13 - C 15 | 0.39  | 10.63 | 0.082 |
| 102. CR ( 1) C 14 | /617. BD* ( 1) C 14 - C 16 | 0.40  | 10.67 | 0.083 |
| 102. CR ( 1) C 14 | /621. BD* ( 1) C 16 - C 18 | 0.45  | 10.50 | 0.088 |
| 103. CR ( 1) C 15 | /278. RY* ( 2) C 13        | 1.57  | 11.54 | 0.170 |
| 103. CR ( 1) C 15 | /311. RY* ( 3) C 17        | 0.48  | 11.37 | 0.093 |
| 103. CR ( 1) C 15 | /613. BD* ( 1) N 12 - C 13 | 0.47  | 10.47 | 0.089 |
| 103. CR ( 1) C 15 | /614. BD* ( 1) C 13 - C 14 | 0.48  | 10.55 | 0.091 |
| 103. CR ( 1) C 15 | /615. BD* ( 1) C 13 - C 15 | 0.83  | 10.71 | 0.120 |
| 103. CR ( 1) C 15 | /620. BD* ( 1) C 15 - O 19 | 0.45  | 10.43 | 0.087 |
| 103. CR ( 1) C 15 | /623. BD* ( 1) C 17 - C 18 | 0.26  | 10.76 | 0.067 |
| 104. CR ( 1) C 16 | /286. RY* ( 2) C 14        | 0.28  | 11.35 | 0.071 |
| 104. CR ( 1) C 16 | /287. RY* ( 3) C 14        | 0.76  | 11.32 | 0.117 |
| 104. CR ( 1) C 16 | /288. RY* ( 4) C 14        | 0.27  | 10.96 | 0.069 |
| 104. CR ( 1) C 16 | /319. RY* ( 3) C 18        | 0.50  | 11.34 | 0.095 |
| 104. CR ( 1) C 16 | /354. RY* ( 2) H 27        | 0.31  | 11.95 | 0.076 |
| 104. CR ( 1) C 16 | /614. BD* ( 1) C 13 - C 14 | 0.49  | 10.48 | 0.091 |
| 104. CR ( 1) C 16 | /617. BD* ( 1) C 14 - C 16 | 0.32  | 10.68 | 0.074 |
| 104. CR ( 1) C 16 | /623. BD* ( 1) C 17 - C 18 | 0.29  | 10.69 | 0.071 |
| 105. CR ( 1) C 17 | /295. RY* ( 3) C 15        | 0.48  | 11.54 | 0.094 |
| 105. CR ( 1) C 17 | /296. RY* ( 4) C 15        | 0.39  | 11.04 | 0.083 |
| 105. CR ( 1) C 17 | /319. RY* ( 3) C 18        | 1.06  | 11.33 | 0.139 |
| 105. CR ( 1) C 17 | /356. RY* ( 2) H 28        | 0.30  | 12.31 | 0.076 |
| 105. CR ( 1) C 17 | /615. BD* ( 1) C 13 - C 15 | 0.40  | 10.63 | 0.083 |
| 105. CR ( 1) C 17 | /621. BD* ( 1) C 16 - C 18 | 0.51  | 10.50 | 0.092 |
| 105. CR ( 1) C 17 | /623. BD* ( 1) C 17 - C 18 | 0.45  | 10.68 | 0.088 |
| 106. CR ( 1) C 18 | /303. RY* ( 3) C 16        | 0.42  | 11.41 | 0.087 |
| 106. CR ( 1) C 18 | /310. RY* ( 2) C 17        | 0.36  | 11.36 | 0.081 |
| 106. CR ( 1) C 18 | /311. RY* ( 3) C 17        | 0.72  | 11.29 | 0.114 |
| 106. CR ( 1) C 18 | /358. RY* ( 2) H 29        | 0.32  | 11.98 | 0.078 |
| 106. CR ( 1) C 18 | /617. BD* ( 1) C 14 - C 16 | 0.27  | 10.68 | 0.068 |
| 106. CR ( 1) C 18 | /619. BD* ( 1) C 15 - C 17 | 0.49  | 10.48 | 0.091 |
| 106. CR ( 1) C 18 | /623. BD* ( 1) C 17 - C 18 | 0.33  | 10.69 | 0.075 |
| 107. CR ( 1) O 19 | /293. RY* ( 1) C 15        | 1.37  | 20.10 | 0.210 |
| 107. CR ( 1) O 19 | /615. BD* ( 1) C 13 - C 15 | 0.29  | 19.53 | 0.096 |
| 108. CR ( 1) O 20 | /181. RY* ( 1) C 1         | 0.49  | 19.74 | 0.125 |
| 108. CR ( 1) O 20 | /182. RY* ( 2) C 1         | 0.59  | 19.89 | 0.137 |
| 108. CR ( 1) O 20 | /360. RY* ( 2) H 30        | 0.29  | 20.83 | 0.099 |
| 144. LP ( 1) N 11 | /269. RY* ( 1) N 12        | 0.99  | 1.10  | 0.042 |
| 144. LP ( 1) N 11 | /270. RY* ( 2) N 12        | 0.65  | 1.12  | 0.035 |
| 144. LP ( 1) N 11 | /598. BD* ( 1) C 4 - C 6   | 4.42  | 0.75  | 0.073 |
| 144. LP ( 1) N 11 | /600. BD* ( 1) C 5 - C 6   | 2.66  | 0.94  | 0.064 |
| 145. LP ( 2) N 11 | / 13. BD* ( 2) C 4 - C 6   | 2.93  | 0.42  | 0.057 |
| 145. LP ( 2) N 11 | /221. RY* ( 1) C 6         | 0.64  | 1.32  | 0.040 |
| 145. LP ( 2) N 11 | /262. RY* ( 2) N 11        | 0.98  | 2.40  | 0.066 |
| 145. LP ( 2) N 11 | /263. RY* ( 3) N 11        | 0.46  | 1.81  | 0.039 |
| 145. LP ( 2) N 11 | /270. RY* ( 2) N 12        | 0.37  | 1.28  | 0.030 |
| 145. LP ( 2) N 11 | /598. BD* ( 1) C 4 - C 6   | 0.33  | 0.92  | 0.023 |
| 145. LP ( 2) N 11 | /600. BD* ( 1) C 5 - C 6   | 0.36  | 1.10  | 0.027 |
| 146. LP ( 1) N 12 | /262. RY* ( 2) N 11        | 0.34  | 2.38  | 0.036 |
| 146. LP ( 1) N 12 | /263. RY* ( 3) N 11        | 0.34  | 1.79  | 0.031 |
| 146. LP ( 1) N 12 | /277. RY* ( 1) C 13        | 0.82  | 1.57  | 0.046 |
| 146. LP ( 1) N 12 | /614. BD* ( 1) C 13 - C 14 | 0.56  | 0.89  | 0.028 |
| 146. LP ( 1) N 12 | /615. BD* ( 1) C 13 - C 15 | 3.51  | 1.05  | 0.077 |
| 147. LP ( 2) N 12 | /261. RY* ( 1) N 11        | 1.34  | 1.17  | 0.052 |
| 147. LP ( 2) N 12 | /280. RY* ( 4) C 13        | 0.51  | 0.91  | 0.028 |
| 147. LP ( 2) N 12 | /616. BD* ( 2) C 13 - C 15 | 16.46 | 0.31  | 0.097 |
| 148. LP ( 1) C 14 | /280. RY* ( 4) C 13        | 0.29  | 0.78  | 0.021 |
| 148. LP ( 1) C 14 | /301. RY* ( 1) C 16        | 2.90  | 0.66  | 0.059 |
| 148. LP ( 1) C 14 | /616. BD* ( 2) C 13 - C 15 | 29.13 | 0.19  | 0.097 |
| 149. LP ( 1) C 18 | /301. RY* ( 1) C 16        | 1.02  | 0.60  | 0.043 |
| 149. LP ( 1) C 18 | /309. RY* ( 1) C 17        | 2.02  | 0.62  | 0.062 |
| 149. LP ( 1) C 18 | /318. RY* ( 2) C 18        | 1.34  | 0.62  | 0.051 |
| 150. LP ( 1) O 19 | /293. RY* ( 1) C 15        | 1.10  | 1.79  | 0.056 |
| 150. LP ( 1) O 19 | /327. RY* ( 3) O 19        | 0.29  | 2.47  | 0.034 |
| 150. LP ( 1) O 19 | /615. BD* ( 1) C 13 - C 15 | 2.87  | 1.21  | 0.075 |
| 151. LP ( 2) O 19 | /615. BD* ( 1) C 13 - C 15 | 0.50  | 0.94  | 0.027 |
| 151. LP ( 2) O 19 | /616. BD* ( 2) C 13 - C 15 | 5.74  | 0.35  | 0.063 |
| 151. LP ( 2) O 19 | /619. BD* ( 1) C 15 - C 17 | 1.41  | 0.78  | 0.042 |
| 152. LP ( 3) O 19 | /262. RY* ( 2) N 11        | 0.30  | 2.37  | 0.036 |

|                           |                            |       |      |       |
|---------------------------|----------------------------|-------|------|-------|
| 152. LP ( 3) O 19         | /293. RY* ( 1) C 15        | 0.33  | 1.61 | 0.031 |
| 152. LP ( 3) O 19         | /326. RY* ( 2) O 19        | 0.30  | 2.09 | 0.034 |
| 152. LP ( 3) O 19         | /327. RY* ( 3) O 19        | 0.35  | 2.29 | 0.039 |
| 152. LP ( 3) O 19         | /615. BD* ( 1) C 13 - C 15 | 0.28  | 1.03 | 0.023 |
| 152. LP ( 3) O 19         | /616. BD* ( 2) C 13 - C 15 | 2.78  | 0.44 | 0.046 |
| 152. LP ( 3) O 19         | /619. BD* ( 1) C 15 - C 17 | 2.48  | 0.87 | 0.063 |
| 153. LP ( 1) O 20         | /181. RY* ( 1) C 1         | 0.67  | 1.37 | 0.038 |
| 153. LP ( 1) O 20         | /182. RY* ( 2) C 1         | 0.80  | 1.52 | 0.044 |
| 153. LP ( 1) O 20         | /590. BD* ( 1) C 1 - C 2   | 3.22  | 1.02 | 0.073 |
| 154. LP ( 2) O 20         | /591. BD* ( 2) C 1 - C 2   | 6.84  | 0.29 | 0.078 |
| 591. BD* ( 2) C 1 - C 2   | /181. RY* ( 1) C 1         | 0.43  | 0.82 | 0.033 |
| 591. BD* ( 2) C 1 - C 2   | /182. RY* ( 2) C 1         | 0.28  | 0.97 | 0.029 |
| 591. BD* ( 2) C 1 - C 2   | /189. RY* ( 1) C 2         | 0.93  | 0.63 | 0.043 |
| 591. BD* ( 2) C 1 - C 2   | /197. RY* ( 1) C 3         | 1.03  | 0.54 | 0.042 |
| 591. BD* ( 2) C 1 - C 2   | /205. RY* ( 1) C 4         | 0.58  | 0.64 | 0.034 |
| 591. BD* ( 2) C 1 - C 2   | /333. RY* ( 1) O 20        | 0.36  | 0.92 | 0.032 |
| 591. BD* ( 2) C 1 - C 2   | /604. BD* ( 2) C 7 - C 8   | 41.96 | 0.07 | 0.078 |
| 604. BD* ( 2) C 7 - C 8   | /229. RY* ( 1) C 7         | 0.65  | 0.86 | 0.056 |
| 604. BD* ( 2) C 7 - C 8   | /230. RY* ( 2) C 7         | 0.64  | 0.86 | 0.055 |
| 604. BD* ( 2) C 7 - C 8   | /237. RY* ( 1) C 8         | 1.77  | 0.47 | 0.068 |
| 604. BD* ( 2) C 7 - C 8   | /609. BD* ( 2) C 9 - C 10  | 88.93 | 0.01 | 0.061 |
| 609. BD* ( 2) C 9 - C 10  | /246. RY* ( 2) C 9         | 1.62  | 0.57 | 0.076 |
| 609. BD* ( 2) C 9 - C 10  | /253. RY* ( 1) C 10        | 1.61  | 0.47 | 0.068 |
| 616. BD* ( 2) C 13 - C 15 | /280. RY* ( 4) C 13        | 0.93  | 0.60 | 0.063 |
| 616. BD* ( 2) C 13 - C 15 | /285. RY* ( 1) C 14        | 0.41  | 0.48 | 0.037 |
| 616. BD* ( 2) C 13 - C 15 | /294. RY* ( 2) C 15        | 0.58  | 0.61 | 0.050 |
| 616. BD* ( 2) C 13 - C 15 | /309. RY* ( 1) C 17        | 0.28  | 0.49 | 0.031 |
| from unit 1 to unit 2     |                            |       |      |       |
| 9. BD* ( 2) C 3 - C 5     | /657. BD* ( 1) C 46 - O 62 | 0.05  | 0.36 | 0.007 |
| 15. BD ( 1) C 5 - C 6     | /539. RY* ( 3) O 62        | 0.03  | 2.38 | 0.011 |
| 35. BD ( 1) C 15 - O 19   | /459. RY* ( 1) C 44        | 0.05  | 2.00 | 0.012 |
| 35. BD ( 1) C 15 - O 19   | /477. RY* ( 3) C 46        | 0.03  | 2.37 | 0.010 |
| 36. BD* ( 1) C 16 - C 17  | /535. RY* ( 1) H 61        | 0.03  | 0.66 | 0.006 |
| 144. LP ( 1) N 11         | /657. BD* ( 1) C 46 - O 62 | 0.10  | 0.61 | 0.010 |
| 145. LP ( 2) N 11         | /404. RY* ( 2) C 37        | 0.12  | 1.56 | 0.019 |
| 145. LP ( 2) N 11         | /408. RY* ( 6) C 37        | 0.05  | 4.03 | 0.020 |
| 145. LP ( 2) N 11         | /444. RY* ( 2) N 42        | 0.13  | 2.47 | 0.024 |
| 145. LP ( 2) N 11         | /445. RY* ( 3) N 42        | 0.07  | 1.79 | 0.016 |
| 145. LP ( 2) N 11         | /453. RY* ( 3) N 43        | 0.03  | 1.55 | 0.009 |
| 145. LP ( 2) N 11         | /475. RY* ( 1) C 46        | 0.08  | 1.65 | 0.016 |
| 145. LP ( 2) N 11         | /538. RY* ( 2) O 62        | 0.14  | 2.32 | 0.025 |
| 145. LP ( 2) N 11         | /539. RY* ( 3) O 62        | 0.26  | 2.08 | 0.032 |
| 145. LP ( 2) N 11         | /657. BD* ( 1) C 46 - O 62 | 0.07  | 0.78 | 0.010 |
| 150. LP ( 1) O 19         | /404. RY* ( 2) C 37        | 0.06  | 1.71 | 0.012 |
| 150. LP ( 1) O 19         | /444. RY* ( 2) N 42        | 0.21  | 2.61 | 0.030 |
| 150. LP ( 1) O 19         | /445. RY* ( 3) N 42        | 0.14  | 1.93 | 0.021 |
| 150. LP ( 1) O 19         | /454. RY* ( 4) N 43        | 0.03  | 2.28 | 0.010 |
| 150. LP ( 1) O 19         | /475. RY* ( 1) C 46        | 0.04  | 1.80 | 0.011 |
| 150. LP ( 1) O 19         | /480. RY* ( 6) C 46        | 0.04  | 3.29 | 0.015 |
| 150. LP ( 1) O 19         | /538. RY* ( 2) O 62        | 0.04  | 2.47 | 0.013 |
| 150. LP ( 1) O 19         | /539. RY* ( 3) O 62        | 0.07  | 2.23 | 0.016 |
| 150. LP ( 1) O 19         | /639. BD* ( 1) C 37 - N 42 | 0.04  | 0.97 | 0.008 |
| 150. LP ( 1) O 19         | /650. BD* ( 1) N 43 - C 44 | 0.05  | 0.96 | 0.009 |
| 150. LP ( 1) O 19         | /657. BD* ( 1) C 46 - O 62 | 0.05  | 0.92 | 0.009 |
| 151. LP ( 2) O 19         | /491. RY* ( 1) C 48        | 0.03  | 0.84 | 0.006 |
| 151. LP ( 2) O 19         | /535. RY* ( 1) H 61        | 0.03  | 0.82 | 0.006 |
| 151. LP ( 2) O 19         | /653. BD* ( 2) C 44 - C 46 | 0.13  | 0.34 | 0.009 |
| 151. LP ( 2) O 19         | /657. BD* ( 1) C 46 - O 62 | 0.16  | 0.65 | 0.013 |
| 152. LP ( 3) O 19         | /404. RY* ( 2) C 37        | 0.11  | 1.52 | 0.017 |
| 152. LP ( 3) O 19         | /444. RY* ( 2) N 42        | 0.36  | 2.43 | 0.040 |
| 152. LP ( 3) O 19         | /445. RY* ( 3) N 42        | 0.11  | 1.75 | 0.019 |
| 152. LP ( 3) O 19         | /475. RY* ( 1) C 46        | 0.08  | 1.61 | 0.015 |
| 152. LP ( 3) O 19         | /476. RY* ( 2) C 46        | 0.03  | 1.05 | 0.008 |
| 152. LP ( 3) O 19         | /477. RY* ( 3) C 46        | 0.04  | 1.96 | 0.012 |
| 152. LP ( 3) O 19         | /480. RY* ( 6) C 46        | 0.04  | 3.11 | 0.016 |
| 152. LP ( 3) O 19         | /538. RY* ( 2) O 62        | 0.08  | 2.29 | 0.018 |
| 152. LP ( 3) O 19         | /539. RY* ( 3) O 62        | 0.07  | 2.05 | 0.016 |
| 152. LP ( 3) O 19         | /639. BD* ( 1) C 37 - N 42 | 0.09  | 0.79 | 0.011 |
| 152. LP ( 3) O 19         | /657. BD* ( 1) C 46 - O 62 | 0.05  | 0.74 | 0.008 |

| from unit |     |        | 1 to unit |    |       | 3           |    |      |        |       |
|-----------|-----|--------|-----------|----|-------|-------------|----|------|--------|-------|
| 11.       | BD  | ( 1) C | 4 - C     | 6  | /168. | LP ( 6)Cr   | 63 | 0.04 | 1.29   | 0.010 |
| 11.       | BD  | ( 1) C | 4 - C     | 6  | /545. | RY* ( 1)Cr  | 63 | 0.03 | 1.16   | 0.007 |
| 12.       | BD  | ( 2) C | 4 - C     | 6  | /166. | LP ( 4)Cr   | 63 | 0.10 | 0.13   | 0.006 |
| 12.       | BD  | ( 2) C | 4 - C     | 6  | /167. | LP ( 5)Cr   | 63 | 0.06 | 0.15   | 0.005 |
| 12.       | BD  | ( 2) C | 4 - C     | 6  | /171. | LP* ( 9)Cr  | 63 | 0.05 | 2.09   | 0.013 |
| 13.       | BD* | ( 2) C | 4 - C     | 6  | /551. | RY* ( 7)Cr  | 63 | 0.03 | 1.95   | 0.012 |
| 15.       | BD  | ( 1) C | 5 - C     | 6  | /171. | LP* ( 9)Cr  | 63 | 0.03 | 2.57   | 0.012 |
| 15.       | BD  | ( 1) C | 5 - C     | 6  | /556. | RY* ( 12)Cr | 63 | 0.03 | 8.80   | 0.020 |
| 17.       | BD  | ( 1) C | 6 - N     | 11 | /166. | LP ( 4)Cr   | 63 | 0.17 | 0.65   | 0.017 |
| 17.       | BD  | ( 1) C | 6 - N     | 11 | /167. | LP ( 5)Cr   | 63 | 0.06 | 0.66   | 0.009 |
| 17.       | BD  | ( 1) C | 6 - N     | 11 | /168. | LP ( 6)Cr   | 63 | 0.85 | 1.43   | 0.047 |
| 17.       | BD  | ( 1) C | 6 - N     | 11 | /170. | LP* ( 8)Cr  | 63 | 0.10 | 2.60   | 0.020 |
| 17.       | BD  | ( 1) C | 6 - N     | 11 | /546. | RY* ( 2)Cr  | 63 | 0.04 | 2.37   | 0.013 |
| 17.       | BD  | ( 1) C | 6 - N     | 11 | /548. | RY* ( 4)Cr  | 63 | 0.05 | 2.33   | 0.014 |
| 17.       | BD  | ( 1) C | 6 - N     | 11 | /549. | RY* ( 5)Cr  | 63 | 0.04 | 2.18   | 0.012 |
| 17.       | BD  | ( 1) C | 6 - N     | 11 | /550. | RY* ( 6)Cr  | 63 | 0.13 | 3.59   | 0.027 |
| 17.       | BD  | ( 1) C | 6 - N     | 11 | /552. | RY* ( 8)Cr  | 63 | 0.04 | 9.48   | 0.024 |
| 17.       | BD  | ( 1) C | 6 - N     | 11 | /555. | RY* ( 11)Cr | 63 | 0.04 | 5.14   | 0.018 |
| 27.       | BD  | ( 1) N | 11 - N    | 12 | /166. | LP ( 4)Cr   | 63 | 0.10 | 0.85   | 0.015 |
| 27.       | BD  | ( 1) N | 11 - N    | 12 | /167. | LP ( 5)Cr   | 63 | 0.04 | 0.87   | 0.009 |
| 27.       | BD  | ( 1) N | 11 - N    | 12 | /168. | LP ( 6)Cr   | 63 | 0.85 | 1.63   | 0.050 |
| 27.       | BD  | ( 1) N | 11 - N    | 12 | /169. | LP ( 7)Cr   | 63 | 0.06 | 2.60   | 0.016 |
| 27.       | BD  | ( 1) N | 11 - N    | 12 | /170. | LP* ( 8)Cr  | 63 | 0.06 | 2.80   | 0.016 |
| 27.       | BD  | ( 1) N | 11 - N    | 12 | /171. | LP* ( 9)Cr  | 63 | 0.10 | 2.80   | 0.021 |
| 27.       | BD  | ( 1) N | 11 - N    | 12 | /545. | RY* ( 1)Cr  | 63 | 0.06 | 1.50   | 0.012 |
| 27.       | BD  | ( 1) N | 11 - N    | 12 | /546. | RY* ( 2)Cr  | 63 | 0.26 | 2.57   | 0.033 |
| 27.       | BD  | ( 1) N | 11 - N    | 12 | /547. | RY* ( 3)Cr  | 63 | 0.07 | 2.69   | 0.017 |
| 27.       | BD  | ( 1) N | 11 - N    | 12 | /548. | RY* ( 4)Cr  | 63 | 0.07 | 2.54   | 0.017 |
| 27.       | BD  | ( 1) N | 11 - N    | 12 | /550. | RY* ( 6)Cr  | 63 | 0.05 | 3.79   | 0.017 |
| 27.       | BD  | ( 1) N | 11 - N    | 12 | /554. | RY* ( 10)Cr | 63 | 0.05 | 10.07  | 0.029 |
| 27.       | BD  | ( 1) N | 11 - N    | 12 | /561. | RY* ( 17)Cr | 63 | 0.06 | 38.53  | 0.060 |
| 27.       | BD  | ( 1) N | 11 - N    | 12 | /564. | RY* ( 20)Cr | 63 | 0.03 | 675.27 | 0.166 |
| 28.       | BD  | ( 1) N | 12 - C    | 13 | /168. | LP ( 6)Cr   | 63 | 0.10 | 1.44   | 0.016 |
| 28.       | BD  | ( 1) N | 12 - C    | 13 | /171. | LP* ( 9)Cr  | 63 | 0.05 | 2.61   | 0.014 |
| 28.       | BD  | ( 1) N | 12 - C    | 13 | /545. | RY* ( 1)Cr  | 63 | 0.03 | 1.31   | 0.008 |
| 28.       | BD  | ( 1) N | 12 - C    | 13 | /546. | RY* ( 2)Cr  | 63 | 0.03 | 2.37   | 0.011 |
| 28.       | BD  | ( 1) N | 12 - C    | 13 | /550. | RY* ( 6)Cr  | 63 | 0.07 | 3.60   | 0.020 |
| 28.       | BD  | ( 1) N | 12 - C    | 13 | /556. | RY* ( 12)Cr | 63 | 0.08 | 8.84   | 0.033 |
| 28.       | BD  | ( 1) N | 12 - C    | 13 | /561. | RY* ( 17)Cr | 63 | 0.12 | 38.34  | 0.087 |
| 28.       | BD  | ( 1) N | 12 - C    | 13 | /564. | RY* ( 20)Cr | 63 | 0.04 | 675.07 | 0.211 |
| 28.       | BD  | ( 1) N | 12 - C    | 13 | /565. | RY* ( 21)Cr | 63 | 0.04 | 27.02  | 0.039 |
| 30.       | BD  | ( 1) C | 13 - C    | 15 | /168. | LP ( 6)Cr   | 63 | 0.09 | 1.41   | 0.015 |
| 30.       | BD  | ( 1) C | 13 - C    | 15 | /545. | RY* ( 1)Cr  | 63 | 0.05 | 1.28   | 0.010 |
| 30.       | BD  | ( 1) C | 13 - C    | 15 | /549. | RY* ( 5)Cr  | 63 | 0.03 | 2.16   | 0.011 |
| 31.       | BD  | ( 2) C | 13 - C    | 15 | /167. | LP ( 5)Cr   | 63 | 0.06 | 0.18   | 0.005 |
| 34.       | BD  | ( 1) C | 15 - C    | 17 | /168. | LP ( 6)Cr   | 63 | 0.15 | 1.29   | 0.019 |
| 34.       | BD  | ( 1) C | 15 - C    | 17 | /170. | LP* ( 8)Cr  | 63 | 0.03 | 2.46   | 0.011 |
| 34.       | BD  | ( 1) C | 15 - C    | 17 | /545. | RY* ( 1)Cr  | 63 | 0.03 | 1.16   | 0.008 |
| 34.       | BD  | ( 1) C | 15 - C    | 17 | /550. | RY* ( 6)Cr  | 63 | 0.03 | 3.46   | 0.012 |
| 35.       | BD  | ( 1) C | 15 - O    | 19 | /167. | LP ( 5)Cr   | 63 | 0.08 | 0.72   | 0.012 |
| 35.       | BD  | ( 1) C | 15 - O    | 19 | /168. | LP ( 6)Cr   | 63 | 0.73 | 1.48   | 0.045 |
| 35.       | BD  | ( 1) C | 15 - O    | 19 | /169. | LP ( 7)Cr   | 63 | 0.05 | 2.46   | 0.013 |
| 35.       | BD  | ( 1) C | 15 - O    | 19 | /170. | LP* ( 8)Cr  | 63 | 0.18 | 2.66   | 0.028 |
| 35.       | BD  | ( 1) C | 15 - O    | 19 | /171. | LP* ( 9)Cr  | 63 | 0.03 | 2.65   | 0.011 |
| 35.       | BD  | ( 1) C | 15 - O    | 19 | /547. | RY* ( 3)Cr  | 63 | 0.04 | 2.54   | 0.013 |
| 35.       | BD  | ( 1) C | 15 - O    | 19 | /548. | RY* ( 4)Cr  | 63 | 0.04 | 2.39   | 0.012 |
| 35.       | BD  | ( 1) C | 15 - O    | 19 | /549. | RY* ( 5)Cr  | 63 | 0.05 | 2.23   | 0.014 |
| 35.       | BD  | ( 1) C | 15 - O    | 19 | /552. | RY* ( 8)Cr  | 63 | 0.04 | 9.54   | 0.024 |
| 35.       | BD  | ( 1) C | 15 - O    | 19 | /553. | RY* ( 9)Cr  | 63 | 0.03 | 5.27   | 0.017 |
| 35.       | BD  | ( 1) C | 15 - O    | 19 | /554. | RY* ( 10)Cr | 63 | 0.03 | 9.93   | 0.023 |
| 99.       | CR  | ( 1) N | 11        |    | /166. | LP ( 4)Cr   | 63 | 0.19 | 14.07  | 0.084 |
| 99.       | CR  | ( 1) N | 11        |    | /167. | LP ( 5)Cr   | 63 | 0.06 | 14.09  | 0.045 |
| 99.       | CR  | ( 1) N | 11        |    | /168. | LP ( 6)Cr   | 63 | 1.13 | 14.86  | 0.176 |
| 100.      | CR  | ( 1) N | 12        |    | /168. | LP ( 6)Cr   | 63 | 0.03 | 14.89  | 0.028 |
| 103.      | CR  | ( 1) C | 15        |    | /168. | LP ( 6)Cr   | 63 | 0.04 | 10.75  | 0.029 |
| 107.      | CR  | ( 1) O | 19        |    | /167. | LP ( 5)Cr   | 63 | 0.17 | 18.80  | 0.088 |
| 107.      | CR  | ( 1) O | 19        |    | /168. | LP ( 6)Cr   | 63 | 1.60 | 19.56  | 0.241 |
| 144.      | LP  | ( 1) N | 11        |    | /166. | LP ( 4)Cr   | 63 | 0.50 | 0.16   | 0.014 |
| 144.      | LP  | ( 1) N | 11        |    | /167. | LP ( 5)Cr   | 63 | 0.08 | 0.18   | 0.006 |
| 144.      | LP  | ( 1) N | 11        |    | /168. | LP ( 6)Cr   | 63 | 0.37 | 0.94   | 0.025 |

|                   |                      |       |        |       |
|-------------------|----------------------|-------|--------|-------|
| 144. LP ( 1) N 11 | /169. LP ( 7)Cr 63   | 0.04  | 1.92   | 0.012 |
| 144. LP ( 1) N 11 | /170. LP* ( 8)Cr 63  | 0.04  | 2.12   | 0.011 |
| 144. LP ( 1) N 11 | /550. RY* ( 6)Cr 63  | 0.07  | 3.11   | 0.019 |
| 144. LP ( 1) N 11 | /561. RY* ( 17)Cr 63 | 0.07  | 37.84  | 0.068 |
| 145. LP ( 2) N 11 | /166. LP ( 4)Cr 63   | 22.12 | 0.32   | 0.125 |
| 145. LP ( 2) N 11 | /167. LP ( 5)Cr 63   | 5.56  | 0.34   | 0.061 |
| 145. LP ( 2) N 11 | /168. LP ( 6)Cr 63   | 18.49 | 1.11   | 0.181 |
| 145. LP ( 2) N 11 | /169. LP ( 7)Cr 63   | 0.08  | 2.08   | 0.018 |
| 145. LP ( 2) N 11 | /170. LP* ( 8)Cr 63  | 0.60  | 2.28   | 0.050 |
| 145. LP ( 2) N 11 | /171. LP* ( 9)Cr 63  | 1.31  | 2.27   | 0.074 |
| 145. LP ( 2) N 11 | /545. RY* ( 1)Cr 63  | 0.41  | 0.98   | 0.027 |
| 145. LP ( 2) N 11 | /546. RY* ( 2)Cr 63  | 0.43  | 2.04   | 0.040 |
| 145. LP ( 2) N 11 | /547. RY* ( 3)Cr 63  | 0.08  | 2.17   | 0.017 |
| 145. LP ( 2) N 11 | /549. RY* ( 5)Cr 63  | 0.15  | 1.85   | 0.023 |
| 145. LP ( 2) N 11 | /550. RY* ( 6)Cr 63  | 2.38  | 3.27   | 0.120 |
| 145. LP ( 2) N 11 | /551. RY* ( 7)Cr 63  | 0.07  | 2.37   | 0.017 |
| 145. LP ( 2) N 11 | /554. RY* ( 10)Cr 63 | 0.04  | 9.55   | 0.027 |
| 145. LP ( 2) N 11 | /555. RY* ( 11)Cr 63 | 0.06  | 4.82   | 0.022 |
| 145. LP ( 2) N 11 | /556. RY* ( 12)Cr 63 | 0.15  | 8.50   | 0.048 |
| 145. LP ( 2) N 11 | /558. RY* ( 14)Cr 63 | 0.03  | 5.04   | 0.016 |
| 145. LP ( 2) N 11 | /560. RY* ( 16)Cr 63 | 0.30  | 115.36 | 0.254 |
| 145. LP ( 2) N 11 | /561. RY* ( 17)Cr 63 | 1.75  | 38.01  | 0.351 |
| 145. LP ( 2) N 11 | /562. RY* ( 18)Cr 63 | 0.05  | 4.97   | 0.022 |
| 145. LP ( 2) N 11 | /564. RY* ( 20)Cr 63 | 0.56  | 674.74 | 0.833 |
| 145. LP ( 2) N 11 | /565. RY* ( 21)Cr 63 | 0.07  | 26.68  | 0.060 |
| 146. LP ( 1) N 12 | /166. LP ( 4)Cr 63   | 0.07  | 0.30   | 0.008 |
| 146. LP ( 1) N 12 | /168. LP ( 6)Cr 63   | 0.11  | 1.08   | 0.014 |
| 146. LP ( 1) N 12 | /171. LP* ( 9)Cr 63  | 0.12  | 2.25   | 0.021 |
| 146. LP ( 1) N 12 | /551. RY* ( 7)Cr 63  | 0.05  | 2.34   | 0.014 |
| 150. LP ( 1) O 19 | /167. LP ( 5)Cr 63   | 1.24  | 0.49   | 0.037 |
| 150. LP ( 1) O 19 | /168. LP ( 6)Cr 63   | 7.16  | 1.25   | 0.128 |
| 150. LP ( 1) O 19 | /169. LP ( 7)Cr 63   | 0.24  | 2.23   | 0.029 |
| 150. LP ( 1) O 19 | /170. LP* ( 8)Cr 63  | 0.12  | 2.42   | 0.022 |
| 150. LP ( 1) O 19 | /171. LP* ( 9)Cr 63  | 0.19  | 2.42   | 0.027 |
| 150. LP ( 1) O 19 | /545. RY* ( 1)Cr 63  | 0.05  | 1.12   | 0.009 |
| 150. LP ( 1) O 19 | /546. RY* ( 2)Cr 63  | 0.30  | 2.19   | 0.032 |
| 150. LP ( 1) O 19 | /548. RY* ( 4)Cr 63  | 0.48  | 2.16   | 0.041 |
| 150. LP ( 1) O 19 | /549. RY* ( 5)Cr 63  | 0.16  | 2.00   | 0.022 |
| 150. LP ( 1) O 19 | /550. RY* ( 6)Cr 63  | 0.54  | 3.42   | 0.055 |
| 150. LP ( 1) O 19 | /551. RY* ( 7)Cr 63  | 0.20  | 2.51   | 0.029 |
| 150. LP ( 1) O 19 | /558. RY* ( 14)Cr 63 | 0.03  | 5.18   | 0.016 |
| 150. LP ( 1) O 19 | /560. RY* ( 16)Cr 63 | 0.10  | 115.51 | 0.136 |
| 150. LP ( 1) O 19 | /561. RY* ( 17)Cr 63 | 0.65  | 38.15  | 0.200 |
| 150. LP ( 1) O 19 | /564. RY* ( 20)Cr 63 | 0.23  | 674.89 | 0.505 |
| 151. LP ( 2) O 19 | /167. LP ( 5)Cr 63   | 0.78  | 0.21   | 0.019 |
| 151. LP ( 2) O 19 | /168. LP ( 6)Cr 63   | 1.62  | 0.98   | 0.053 |
| 151. LP ( 2) O 19 | /169. LP ( 7)Cr 63   | 0.17  | 1.95   | 0.023 |
| 151. LP ( 2) O 19 | /170. LP* ( 8)Cr 63  | 0.16  | 2.15   | 0.024 |
| 151. LP ( 2) O 19 | /546. RY* ( 2)Cr 63  | 0.03  | 1.91   | 0.009 |
| 151. LP ( 2) O 19 | /549. RY* ( 5)Cr 63  | 0.12  | 1.72   | 0.018 |
| 151. LP ( 2) O 19 | /550. RY* ( 6)Cr 63  | 0.13  | 3.14   | 0.026 |
| 151. LP ( 2) O 19 | /551. RY* ( 7)Cr 63  | 0.05  | 2.24   | 0.014 |
| 151. LP ( 2) O 19 | /561. RY* ( 17)Cr 63 | 0.16  | 37.88  | 0.098 |
| 151. LP ( 2) O 19 | /564. RY* ( 20)Cr 63 | 0.05  | 674.61 | 0.241 |
| 152. LP ( 3) O 19 | /166. LP ( 4)Cr 63   | 0.55  | 0.29   | 0.019 |
| 152. LP ( 3) O 19 | /167. LP ( 5)Cr 63   | 20.05 | 0.30   | 0.109 |
| 152. LP ( 3) O 19 | /168. LP ( 6)Cr 63   | 20.30 | 1.07   | 0.186 |
| 152. LP ( 3) O 19 | /169. LP ( 7)Cr 63   | 0.16  | 2.04   | 0.024 |
| 152. LP ( 3) O 19 | /170. LP* ( 8)Cr 63  | 1.34  | 2.24   | 0.074 |
| 152. LP ( 3) O 19 | /171. LP* ( 9)Cr 63  | 0.45  | 2.24   | 0.043 |
| 152. LP ( 3) O 19 | /545. RY* ( 1)Cr 63  | 0.31  | 0.94   | 0.023 |
| 152. LP ( 3) O 19 | /546. RY* ( 2)Cr 63  | 0.34  | 2.01   | 0.035 |
| 152. LP ( 3) O 19 | /548. RY* ( 4)Cr 63  | 0.34  | 1.98   | 0.035 |
| 152. LP ( 3) O 19 | /549. RY* ( 5)Cr 63  | 0.16  | 1.82   | 0.023 |
| 152. LP ( 3) O 19 | /550. RY* ( 6)Cr 63  | 0.87  | 3.23   | 0.072 |
| 152. LP ( 3) O 19 | /551. RY* ( 7)Cr 63  | 0.34  | 2.33   | 0.038 |
| 152. LP ( 3) O 19 | /554. RY* ( 10)Cr 63 | 0.04  | 9.51   | 0.028 |
| 152. LP ( 3) O 19 | /558. RY* ( 14)Cr 63 | 0.03  | 5.00   | 0.017 |
| 152. LP ( 3) O 19 | /560. RY* ( 16)Cr 63 | 0.20  | 115.32 | 0.204 |
| 152. LP ( 3) O 19 | /561. RY* ( 17)Cr 63 | 1.19  | 37.97  | 0.289 |
| 152. LP ( 3) O 19 | /563. RY* ( 19)Cr 63 | 0.07  | 26.08  | 0.059 |

|                         |                            |      |        |       |
|-------------------------|----------------------------|------|--------|-------|
| 152. LP ( 3) O 19       | /564. RY* ( 20)Cr 63       | 0.36 | 674.71 | 0.672 |
| from unit 1 to unit 4   |                            |      |        |       |
| 11. BD ( 1) C 4 - C 6   | /571. RY* ( 2) O 66        | 0.04 | 1.68   | 0.010 |
| 12. BD ( 2) C 4 - C 6   | /571. RY* ( 2) O 66        | 0.03 | 1.31   | 0.008 |
| 12. BD ( 2) C 4 - C 6   | /665. BD* ( 1) H 65 - O 66 | 0.04 | 0.60   | 0.006 |
| 13. BD* ( 2) C 4 - C 6  | /665. BD* ( 1) H 65 - O 66 | 0.05 | 0.37   | 0.007 |
| 28. BD ( 1) N 12 - C 13 | /570. RY* ( 1) O 66        | 0.04 | 2.92   | 0.014 |
| 144. LP ( 1) N 11       | /570. RY* ( 1) O 66        | 0.03 | 2.43   | 0.010 |
| 145. LP ( 2) N 11       | /566. RY* ( 1) H 64        | 0.12 | 1.09   | 0.015 |
| 145. LP ( 2) N 11       | /568. RY* ( 1) H 65        | 0.13 | 1.20   | 0.017 |
| 145. LP ( 2) N 11       | /570. RY* ( 1) O 66        | 0.60 | 2.59   | 0.054 |
| 150. LP ( 1) O 19       | /566. RY* ( 1) H 64        | 0.05 | 1.23   | 0.010 |
| 150. LP ( 1) O 19       | /568. RY* ( 1) H 65        | 0.05 | 1.34   | 0.011 |
| 150. LP ( 1) O 19       | /570. RY* ( 1) O 66        | 0.18 | 2.74   | 0.029 |
| 151. LP ( 2) O 19       | /568. RY* ( 1) H 65        | 0.03 | 1.07   | 0.007 |
| 151. LP ( 2) O 19       | /570. RY* ( 1) O 66        | 0.05 | 2.46   | 0.014 |
| 152. LP ( 3) O 19       | /566. RY* ( 1) H 64        | 0.05 | 1.05   | 0.009 |
| 152. LP ( 3) O 19       | /568. RY* ( 1) H 65        | 0.05 | 1.16   | 0.010 |
| 152. LP ( 3) O 19       | /570. RY* ( 1) O 66        | 0.23 | 2.55   | 0.033 |
| 152. LP ( 3) O 19       | /572. RY* ( 3) O 66        | 0.07 | 1.73   | 0.015 |
| 152. LP ( 3) O 19       | /664. BD* ( 1) H 64 - O 66 | 0.03 | 0.75   | 0.006 |
| 152. LP ( 3) O 19       | /665. BD* ( 1) H 65 - O 66 | 0.03 | 0.75   | 0.007 |
| from unit 1 to unit 5   |                            |      |        |       |
| 30. BD ( 1) C 13 - C 15 | /578. RY* ( 1)C1 67        | 0.04 | 1.33   | 0.009 |
| 31. BD ( 2) C 13 - C 15 | /578. RY* ( 1)C1 67        | 0.04 | 0.86   | 0.007 |
| 144. LP ( 1) N 11       | /580. RY* ( 3)C1 67        | 0.03 | 1.19   | 0.007 |
| 144. LP ( 1) N 11       | /581. RY* ( 4)C1 67        | 0.03 | 1.93   | 0.009 |
| 145. LP ( 2) N 11       | /578. RY* ( 1)C1 67        | 0.03 | 1.02   | 0.008 |
| 145. LP ( 2) N 11       | /579. RY* ( 2)C1 67        | 0.43 | 1.12   | 0.030 |
| 145. LP ( 2) N 11       | /580. RY* ( 3)C1 67        | 0.09 | 1.36   | 0.015 |
| 145. LP ( 2) N 11       | /581. RY* ( 4)C1 67        | 0.32 | 2.09   | 0.035 |
| 150. LP ( 1) O 19       | /579. RY* ( 2)C1 67        | 0.13 | 1.26   | 0.017 |
| 150. LP ( 1) O 19       | /580. RY* ( 3)C1 67        | 0.06 | 1.50   | 0.012 |
| 150. LP ( 1) O 19       | /581. RY* ( 4)C1 67        | 0.16 | 2.24   | 0.024 |
| 151. LP ( 2) O 19       | /579. RY* ( 2)C1 67        | 0.04 | 0.99   | 0.008 |
| 151. LP ( 2) O 19       | /580. RY* ( 3)C1 67        | 0.03 | 1.23   | 0.008 |
| 151. LP ( 2) O 19       | /581. RY* ( 4)C1 67        | 0.07 | 1.96   | 0.015 |
| 152. LP ( 3) O 19       | /579. RY* ( 2)C1 67        | 0.26 | 1.08   | 0.023 |
| 152. LP ( 3) O 19       | /580. RY* ( 3)C1 67        | 0.08 | 1.32   | 0.014 |
| 152. LP ( 3) O 19       | /581. RY* ( 4)C1 67        | 0.15 | 2.05   | 0.024 |
| from unit 2 to unit 1   |                            |      |        |       |
| 71. BD ( 1) N 43 - C 44 | /327. RY* ( 3) O 19        | 0.03 | 2.66   | 0.012 |
| 73. BD ( 1) C 44 - C 46 | /327. RY* ( 3) O 19        | 0.08 | 2.64   | 0.018 |
| 74. BD ( 2) C 44 - C 46 | /327. RY* ( 3) O 19        | 0.05 | 2.17   | 0.013 |
| 74. BD ( 2) C 44 - C 46 | /620. BD* ( 1) C 15 - O 19 | 0.11 | 0.62   | 0.011 |
| 155. LP ( 1) N 42       | /620. BD* ( 1) C 15 - O 19 | 0.05 | 0.63   | 0.007 |
| 156. LP ( 2) N 42       | /222. RY* ( 2) C 6         | 0.08 | 1.68   | 0.016 |
| 156. LP ( 2) N 42       | /224. RY* ( 4) C 6         | 0.07 | 1.51   | 0.014 |
| 156. LP ( 2) N 42       | /226. RY* ( 6) C 6         | 0.05 | 3.47   | 0.017 |
| 156. LP ( 2) N 42       | /262. RY* ( 2) N 11        | 0.14 | 2.41   | 0.025 |
| 156. LP ( 2) N 42       | /263. RY* ( 3) N 11        | 0.04 | 1.81   | 0.011 |
| 156. LP ( 2) N 42       | /293. RY* ( 1) C 15        | 0.09 | 1.65   | 0.016 |
| 156. LP ( 2) N 42       | /295. RY* ( 3) C 15        | 0.03 | 1.99   | 0.010 |
| 156. LP ( 2) N 42       | /297. RY* ( 5) C 15        | 0.03 | 4.28   | 0.016 |
| 156. LP ( 2) N 42       | /326. RY* ( 2) O 19        | 0.14 | 2.14   | 0.023 |
| 156. LP ( 2) N 42       | /327. RY* ( 3) O 19        | 0.31 | 2.33   | 0.037 |
| 156. LP ( 2) N 42       | /620. BD* ( 1) C 15 - O 19 | 0.12 | 0.79   | 0.013 |
| 163. LP ( 1) O 62       | / 9. BD* ( 2) C 3 - C 5    | 0.09 | 0.56   | 0.013 |
| 163. LP ( 1) O 62       | /262. RY* ( 2) N 11        | 0.19 | 2.55   | 0.028 |
| 163. LP ( 1) O 62       | /263. RY* ( 3) N 11        | 0.13 | 1.95   | 0.020 |
| 163. LP ( 1) O 62       | /293. RY* ( 1) C 15        | 0.04 | 1.79   | 0.011 |
| 163. LP ( 1) O 62       | /326. RY* ( 2) O 19        | 0.05 | 2.28   | 0.013 |
| 163. LP ( 1) O 62       | /327. RY* ( 3) O 19        | 0.08 | 2.47   | 0.018 |
| 163. LP ( 1) O 62       | /596. BD* ( 1) C 3 - C 5   | 0.05 | 1.07   | 0.009 |
| 163. LP ( 1) O 62       | /612. BD* ( 1) N 11 - N 12 | 0.04 | 1.09   | 0.009 |
| 164. LP ( 2) O 62       | /327. RY* ( 3) O 19        | 0.03 | 2.22   | 0.010 |
| 164. LP ( 2) O 62       | /601. BD* ( 1) C 5 - H 31  | 0.04 | 0.81   | 0.008 |
| 165. LP ( 3) O 62       | /222. RY* ( 2) C 6         | 0.07 | 1.63   | 0.015 |

|                   |                            |      |      |       |
|-------------------|----------------------------|------|------|-------|
| 165. LP ( 3) O 62 | /261. RY* ( 1) N 11        | 0.04 | 1.30 | 0.010 |
| 165. LP ( 3) O 62 | /262. RY* ( 2) N 11        | 0.28 | 2.36 | 0.035 |
| 165. LP ( 3) O 62 | /263. RY* ( 3) N 11        | 0.20 | 1.77 | 0.026 |
| 165. LP ( 3) O 62 | /271. RY* ( 3) N 12        | 0.03 | 1.54 | 0.009 |
| 165. LP ( 3) O 62 | /293. RY* ( 1) C 15        | 0.06 | 1.60 | 0.014 |
| 165. LP ( 3) O 62 | /326. RY* ( 2) O 19        | 0.10 | 2.09 | 0.019 |
| 165. LP ( 3) O 62 | /327. RY* ( 3) O 19        | 0.16 | 2.28 | 0.026 |
| 165. LP ( 3) O 62 | /602. BD* ( 1) C 6 - N 11  | 0.04 | 0.79 | 0.008 |
| 165. LP ( 3) O 62 | /612. BD* ( 1) N 11 - N 12 | 0.08 | 0.90 | 0.011 |
| 165. LP ( 3) O 62 | /620. BD* ( 1) C 15 - O 19 | 0.06 | 0.74 | 0.009 |

within unit 2

|                         |                            |      |      |       |
|-------------------------|----------------------------|------|------|-------|
| 44. BD ( 1) C 32 - C 33 | /380. RY* ( 2) C 34        | 0.54 | 2.00 | 0.042 |
| 44. BD ( 1) C 32 - C 33 | /381. RY* ( 3) C 34        | 0.28 | 2.00 | 0.030 |
| 44. BD ( 1) C 32 - C 33 | /388. RY* ( 2) C 35        | 0.70 | 2.21 | 0.050 |
| 44. BD ( 1) C 32 - C 33 | /411. RY* ( 1) C 38        | 0.59 | 1.83 | 0.042 |
| 44. BD ( 1) C 32 - C 33 | /629. BD* ( 1) C 32 - C 34 | 1.45 | 1.26 | 0.054 |
| 44. BD ( 1) C 32 - C 33 | /631. BD* ( 1) C 33 - C 35 | 1.25 | 1.27 | 0.050 |
| 44. BD ( 1) C 32 - C 33 | /632. BD* ( 1) C 33 - C 38 | 0.60 | 1.10 | 0.032 |
| 44. BD ( 1) C 32 - C 33 | /634. BD* ( 1) C 34 - H 51 | 1.33 | 1.09 | 0.048 |
| 44. BD ( 1) C 32 - C 33 | /636. BD* ( 1) C 35 - C 40 | 2.12 | 1.11 | 0.061 |
| 44. BD ( 1) C 32 - C 33 | /640. BD* ( 1) C 38 - C 39 | 0.69 | 1.30 | 0.038 |
| 45. BD ( 2) C 32 - C 33 | / 52. BD* ( 2) C 34 - C 36 | 5.84 | 0.22 | 0.066 |
| 45. BD ( 2) C 32 - C 33 | / 56. BD* ( 2) C 35 - C 37 | 7.32 | 0.23 | 0.071 |
| 45. BD ( 2) C 32 - C 33 | /379. RY* ( 1) C 34        | 1.06 | 0.77 | 0.037 |
| 45. BD ( 2) C 32 - C 33 | /387. RY* ( 1) C 35        | 0.88 | 0.87 | 0.036 |
| 45. BD ( 2) C 32 - C 33 | /412. RY* ( 2) C 38        | 0.62 | 0.83 | 0.029 |
| 45. BD ( 2) C 32 - C 33 | /507. RY* ( 1) O 50        | 0.34 | 1.15 | 0.026 |
| 45. BD ( 2) C 32 - C 33 | /628. BD* ( 2) C 32 - C 33 | 0.40 | 0.23 | 0.016 |
| 45. BD ( 2) C 32 - C 33 | /641. BD* ( 2) C 38 - C 39 | 7.07 | 0.31 | 0.065 |
| 45. BD ( 2) C 32 - C 33 | /646. BD* ( 2) C 40 - C 41 | 0.28 | 0.30 | 0.013 |
| 46. BD ( 1) C 32 - C 34 | /373. RY* ( 3) C 33        | 0.64 | 2.23 | 0.048 |
| 46. BD ( 1) C 32 - C 34 | /397. RY* ( 3) C 36        | 0.58 | 1.94 | 0.043 |
| 46. BD ( 1) C 32 - C 34 | /627. BD* ( 1) C 32 - C 33 | 1.44 | 1.19 | 0.053 |
| 46. BD ( 1) C 32 - C 34 | /630. BD* ( 1) C 32 - O 50 | 0.28 | 1.04 | 0.021 |
| 46. BD ( 1) C 32 - C 34 | /632. BD* ( 1) C 33 - C 38 | 1.12 | 1.22 | 0.047 |
| 46. BD ( 1) C 32 - C 34 | /633. BD* ( 1) C 34 - C 36 | 0.73 | 1.23 | 0.038 |
| 46. BD ( 1) C 32 - C 34 | /634. BD* ( 1) C 34 - H 51 | 0.58 | 1.20 | 0.034 |
| 46. BD ( 1) C 32 - C 34 | /638. BD* ( 1) C 36 - H 61 | 0.65 | 1.22 | 0.036 |
| 46. BD ( 1) C 32 - C 34 | /663. BD* ( 1) O 50 - H 60 | 0.72 | 1.08 | 0.035 |
| 47. BD ( 1) C 32 - O 50 | /380. RY* ( 2) C 34        | 0.28 | 2.24 | 0.032 |
| 47. BD ( 1) C 32 - O 50 | /629. BD* ( 1) C 32 - C 34 | 0.38 | 1.51 | 0.030 |
| 47. BD ( 1) C 32 - O 50 | /631. BD* ( 1) C 33 - C 35 | 0.56 | 1.52 | 0.037 |
| 47. BD ( 1) C 32 - O 50 | /633. BD* ( 1) C 34 - C 36 | 0.98 | 1.36 | 0.046 |
| 48. BD ( 1) C 33 - C 35 | /365. RY* ( 3) C 32        | 0.43 | 2.20 | 0.039 |
| 48. BD ( 1) C 33 - C 35 | /404. RY* ( 2) C 37        | 0.37 | 1.84 | 0.033 |
| 48. BD ( 1) C 33 - C 35 | /411. RY* ( 1) C 38        | 0.41 | 1.93 | 0.036 |
| 48. BD ( 1) C 33 - C 35 | /627. BD* ( 1) C 32 - C 33 | 1.24 | 1.16 | 0.048 |
| 48. BD ( 1) C 33 - C 35 | /630. BD* ( 1) C 32 - O 50 | 1.31 | 1.02 | 0.046 |
| 48. BD ( 1) C 33 - C 35 | /632. BD* ( 1) C 33 - C 38 | 1.60 | 1.19 | 0.055 |
| 48. BD ( 1) C 33 - C 35 | /635. BD* ( 1) C 35 - C 37 | 1.64 | 1.19 | 0.056 |
| 48. BD ( 1) C 33 - C 35 | /636. BD* ( 1) C 35 - C 40 | 1.60 | 1.20 | 0.056 |
| 48. BD ( 1) C 33 - C 35 | /639. BD* ( 1) C 37 - N 42 | 1.44 | 1.11 | 0.051 |
| 48. BD ( 1) C 33 - C 35 | /642. BD* ( 1) C 38 - H 52 | 0.75 | 1.20 | 0.038 |
| 48. BD ( 1) C 33 - C 35 | /647. BD* ( 1) C 40 - H 54 | 0.72 | 1.20 | 0.037 |
| 49. BD ( 1) C 33 - C 38 | /363. RY* ( 1) C 32        | 0.33 | 1.48 | 0.028 |
| 49. BD ( 1) C 33 - C 38 | /365. RY* ( 3) C 32        | 0.34 | 2.08 | 0.034 |
| 49. BD ( 1) C 33 - C 38 | /388. RY* ( 2) C 35        | 0.45 | 2.19 | 0.040 |
| 49. BD ( 1) C 33 - C 38 | /420. RY* ( 2) C 39        | 0.34 | 1.87 | 0.032 |
| 49. BD ( 1) C 33 - C 38 | /421. RY* ( 3) C 39        | 0.72 | 1.99 | 0.048 |
| 49. BD ( 1) C 33 - C 38 | /627. BD* ( 1) C 32 - C 33 | 0.48 | 1.05 | 0.028 |
| 49. BD ( 1) C 33 - C 38 | /629. BD* ( 1) C 32 - C 34 | 0.74 | 1.24 | 0.038 |
| 49. BD ( 1) C 33 - C 38 | /631. BD* ( 1) C 33 - C 35 | 1.82 | 1.25 | 0.060 |
| 49. BD ( 1) C 33 - C 38 | /635. BD* ( 1) C 35 - C 37 | 2.50 | 1.08 | 0.066 |
| 49. BD ( 1) C 33 - C 38 | /640. BD* ( 1) C 38 - C 39 | 1.26 | 1.29 | 0.051 |
| 49. BD ( 1) C 33 - C 38 | /642. BD* ( 1) C 38 - H 52 | 0.29 | 1.09 | 0.022 |
| 49. BD ( 1) C 33 - C 38 | /644. BD* ( 1) C 39 - H 53 | 1.36 | 1.09 | 0.049 |
| 50. BD ( 1) C 34 - C 36 | /363. RY* ( 1) C 32        | 0.28 | 1.50 | 0.026 |
| 50. BD ( 1) C 34 - C 36 | /364. RY* ( 2) C 32        | 0.48 | 1.52 | 0.034 |
| 50. BD ( 1) C 34 - C 36 | /365. RY* ( 3) C 32        | 0.35 | 2.10 | 0.034 |
| 50. BD ( 1) C 34 - C 36 | /405. RY* ( 3) C 37        | 0.89 | 1.72 | 0.050 |



|                          |                            |       |      |       |
|--------------------------|----------------------------|-------|------|-------|
| 50. BD ( 1) C 34 - C 36  | /629. BD* ( 1) C 32 - C 34 | 0.81  | 1.26 | 0.041 |
| 50. BD ( 1) C 34 - C 36  | /630. BD* ( 1) C 32 - O 50 | 2.67  | 0.93 | 0.063 |
| 50. BD ( 1) C 34 - C 36  | /637. BD* ( 1) C 36 - C 37 | 1.03  | 1.28 | 0.046 |
| 50. BD ( 1) C 34 - C 36  | /639. BD* ( 1) C 37 - N 42 | 3.00  | 1.02 | 0.070 |
| 51. BD ( 2) C 34 - C 36  | / 56. BD* ( 2) C 35 - C 37 | 5.77  | 0.23 | 0.064 |
| 51. BD ( 2) C 34 - C 36  | /403. RY* ( 1) C 37        | 0.44  | 1.12 | 0.028 |
| 51. BD ( 2) C 34 - C 36  | /628. BD* ( 2) C 32 - C 33 | 6.60  | 0.23 | 0.067 |
| 52. BD* ( 2) C 34 - C 36 | /379. RY* ( 1) C 34        | 2.12  | 0.54 | 0.056 |
| 52. BD* ( 2) C 34 - C 36 | /395. RY* ( 1) C 36        | 1.49  | 0.59 | 0.049 |
| 53. BD ( 1) C 34 - H 51  | /365. RY* ( 3) C 32        | 0.48  | 1.97 | 0.039 |
| 53. BD ( 1) C 34 - H 51  | /368. RY* ( 6) C 32        | 0.30  | 8.49 | 0.064 |
| 53. BD ( 1) C 34 - H 51  | /396. RY* ( 2) C 36        | 0.51  | 1.78 | 0.038 |
| 53. BD ( 1) C 34 - H 51  | /627. BD* ( 1) C 32 - C 33 | 3.08  | 0.94 | 0.068 |
| 53. BD ( 1) C 34 - H 51  | /629. BD* ( 1) C 32 - C 34 | 0.40  | 1.13 | 0.027 |
| 53. BD ( 1) C 34 - H 51  | /630. BD* ( 1) C 32 - O 50 | 0.94  | 0.79 | 0.034 |
| 53. BD ( 1) C 34 - H 51  | /637. BD* ( 1) C 36 - C 37 | 1.45  | 1.15 | 0.052 |
| 53. BD ( 1) C 34 - H 51  | /638. BD* ( 1) C 36 - H 61 | 0.30  | 0.97 | 0.021 |
| 54. BD ( 1) C 35 - C 37  | /372. RY* ( 2) C 33        | 0.83  | 2.34 | 0.056 |
| 54. BD ( 1) C 35 - C 37  | /396. RY* ( 2) C 36        | 0.49  | 1.92 | 0.039 |
| 54. BD ( 1) C 35 - C 37  | /427. RY* ( 1) C 40        | 0.34  | 1.49 | 0.029 |
| 54. BD ( 1) C 35 - C 37  | /428. RY* ( 2) C 40        | 0.47  | 1.62 | 0.035 |
| 54. BD ( 1) C 35 - C 37  | /443. RY* ( 1) N 42        | 0.59  | 1.52 | 0.038 |
| 54. BD ( 1) C 35 - C 37  | /631. BD* ( 1) C 33 - C 35 | 1.55  | 1.27 | 0.056 |
| 54. BD ( 1) C 35 - C 37  | /632. BD* ( 1) C 33 - C 38 | 1.92  | 1.10 | 0.058 |
| 54. BD ( 1) C 35 - C 37  | /636. BD* ( 1) C 35 - C 40 | 0.81  | 1.11 | 0.038 |
| 54. BD ( 1) C 35 - C 37  | /637. BD* ( 1) C 36 - C 37 | 1.63  | 1.28 | 0.058 |
| 54. BD ( 1) C 35 - C 37  | /638. BD* ( 1) C 36 - H 61 | 1.41  | 1.10 | 0.050 |
| 54. BD ( 1) C 35 - C 37  | /639. BD* ( 1) C 37 - N 42 | 0.29  | 1.02 | 0.022 |
| 54. BD ( 1) C 35 - C 37  | /645. BD* ( 1) C 40 - C 41 | 0.72  | 1.31 | 0.039 |
| 54. BD ( 1) C 35 - C 37  | /649. BD* ( 1) N 42 - N 43 | 0.29  | 1.13 | 0.023 |
| 55. BD ( 2) C 35 - C 37  | / 52. BD* ( 2) C 34 - C 36 | 6.29  | 0.23 | 0.069 |
| 55. BD ( 2) C 35 - C 37  | /371. RY* ( 1) C 33        | 0.79  | 0.87 | 0.034 |
| 55. BD ( 2) C 35 - C 37  | /395. RY* ( 1) C 36        | 1.56  | 0.81 | 0.046 |
| 55. BD ( 2) C 35 - C 37  | /628. BD* ( 2) C 32 - C 33 | 4.54  | 0.23 | 0.055 |
| 55. BD ( 2) C 35 - C 37  | /646. BD* ( 2) C 40 - C 41 | 5.88  | 0.30 | 0.061 |
| 55. BD ( 2) C 35 - C 37  | /649. BD* ( 1) N 42 - N 43 | 2.60  | 0.76 | 0.057 |
| 56. BD* ( 2) C 35 - C 37 | /371. RY* ( 1) C 33        | 0.91  | 0.63 | 0.042 |
| 56. BD* ( 2) C 35 - C 37 | /387. RY* ( 1) C 35        | 1.49  | 0.64 | 0.054 |
| 56. BD* ( 2) C 35 - C 37 | /395. RY* ( 1) C 36        | 1.14  | 0.58 | 0.045 |
| 56. BD* ( 2) C 35 - C 37 | /403. RY* ( 1) C 37        | 0.51  | 0.89 | 0.037 |
| 56. BD* ( 2) C 35 - C 37 | /635. BD* ( 1) C 35 - C 37 | 0.38  | 0.49 | 0.023 |
| 56. BD* ( 2) C 35 - C 37 | /646. BD* ( 2) C 40 - C 41 | 53.76 | 0.07 | 0.085 |
| 56. BD* ( 2) C 35 - C 37 | /649. BD* ( 1) N 42 - N 43 | 2.12  | 0.52 | 0.057 |
| 57. BD ( 1) C 35 - C 40  | /372. RY* ( 2) C 33        | 0.48  | 2.32 | 0.042 |
| 57. BD ( 1) C 35 - C 40  | /403. RY* ( 1) C 37        | 0.50  | 1.48 | 0.034 |
| 57. BD ( 1) C 35 - C 40  | /404. RY* ( 2) C 37        | 0.68  | 1.73 | 0.044 |
| 57. BD ( 1) C 35 - C 40  | /436. RY* ( 2) C 41        | 0.38  | 1.96 | 0.035 |
| 57. BD ( 1) C 35 - C 40  | /437. RY* ( 3) C 41        | 0.74  | 2.01 | 0.049 |
| 57. BD ( 1) C 35 - C 40  | /627. BD* ( 1) C 32 - C 33 | 2.33  | 1.05 | 0.063 |
| 57. BD ( 1) C 35 - C 40  | /631. BD* ( 1) C 33 - C 35 | 1.83  | 1.25 | 0.061 |
| 57. BD ( 1) C 35 - C 40  | /635. BD* ( 1) C 35 - C 37 | 0.80  | 1.08 | 0.037 |
| 57. BD ( 1) C 35 - C 40  | /637. BD* ( 1) C 36 - C 37 | 1.02  | 1.26 | 0.045 |
| 57. BD ( 1) C 35 - C 40  | /645. BD* ( 1) C 40 - C 41 | 1.38  | 1.29 | 0.054 |
| 57. BD ( 1) C 35 - C 40  | /647. BD* ( 1) C 40 - H 54 | 0.32  | 1.09 | 0.023 |
| 57. BD ( 1) C 35 - C 40  | /648. BD* ( 1) C 41 - H 55 | 1.41  | 1.09 | 0.050 |
| 58. BD ( 1) C 36 - C 37  | /381. RY* ( 3) C 34        | 0.66  | 2.11 | 0.047 |
| 58. BD ( 1) C 36 - C 37  | /389. RY* ( 3) C 35        | 0.71  | 2.31 | 0.051 |
| 58. BD ( 1) C 36 - C 37  | /443. RY* ( 1) N 42        | 0.70  | 1.63 | 0.043 |
| 58. BD ( 1) C 36 - C 37  | /633. BD* ( 1) C 34 - C 36 | 0.90  | 1.22 | 0.042 |
| 58. BD ( 1) C 36 - C 37  | /634. BD* ( 1) C 34 - H 51 | 0.58  | 1.20 | 0.033 |
| 58. BD ( 1) C 36 - C 37  | /635. BD* ( 1) C 35 - C 37 | 1.69  | 1.21 | 0.058 |
| 58. BD ( 1) C 36 - C 37  | /636. BD* ( 1) C 35 - C 40 | 1.15  | 1.22 | 0.047 |
| 58. BD ( 1) C 36 - C 37  | /638. BD* ( 1) C 36 - H 61 | 0.75  | 1.21 | 0.038 |
| 58. BD ( 1) C 36 - C 37  | /639. BD* ( 1) C 37 - N 42 | 0.69  | 1.13 | 0.035 |
| 58. BD ( 1) C 36 - C 37  | /649. BD* ( 1) N 42 - N 43 | 0.40  | 1.24 | 0.028 |
| 59. BD ( 1) C 36 - H 61  | /380. RY* ( 2) C 34        | 0.49  | 1.85 | 0.038 |
| 59. BD ( 1) C 36 - H 61  | /403. RY* ( 1) C 37        | 0.38  | 1.35 | 0.029 |
| 59. BD ( 1) C 36 - H 61  | /404. RY* ( 2) C 37        | 0.68  | 1.61 | 0.042 |
| 59. BD ( 1) C 36 - H 61  | /406. RY* ( 4) C 37        | 0.30  | 1.56 | 0.028 |
| 59. BD ( 1) C 36 - H 61  | /629. BD* ( 1) C 32 - C 34 | 1.35  | 1.12 | 0.049 |
| 59. BD ( 1) C 36 - H 61  | /634. BD* ( 1) C 34 - H 51 | 0.29  | 0.94 | 0.021 |

|                         |                            |      |      |       |
|-------------------------|----------------------------|------|------|-------|
| 59. BD ( 1) C 36 - H 61 | /635. BD* ( 1) C 35 - C 37 | 3.38 | 0.95 | 0.072 |
| 59. BD ( 1) C 36 - H 61 | /637. BD* ( 1) C 36 - C 37 | 0.66 | 1.14 | 0.035 |
| 59. BD ( 1) C 36 - H 61 | /639. BD* ( 1) C 37 - N 42 | 0.72 | 0.87 | 0.032 |
| 60. BD ( 1) C 37 - N 42 | /389. RY* ( 3) C 35        | 0.69 | 2.34 | 0.051 |
| 60. BD ( 1) C 37 - N 42 | /396. RY* ( 2) C 36        | 0.63 | 2.06 | 0.046 |
| 60. BD ( 1) C 37 - N 42 | /404. RY* ( 2) C 37        | 0.26 | 1.89 | 0.028 |
| 60. BD ( 1) C 37 - N 42 | /451. RY* ( 1) N 43        | 0.72 | 1.62 | 0.043 |
| 60. BD ( 1) C 37 - N 42 | /452. RY* ( 2) N 43        | 0.35 | 1.62 | 0.030 |
| 60. BD ( 1) C 37 - N 42 | /631. BD* ( 1) C 33 - C 35 | 0.76 | 1.41 | 0.041 |
| 60. BD ( 1) C 37 - N 42 | /633. BD* ( 1) C 34 - C 36 | 1.21 | 1.25 | 0.049 |
| 60. BD ( 1) C 37 - N 42 | /635. BD* ( 1) C 35 - C 37 | 0.44 | 1.24 | 0.030 |
| 60. BD ( 1) C 37 - N 42 | /637. BD* ( 1) C 36 - C 37 | 0.88 | 1.42 | 0.045 |
| 60. BD ( 1) C 37 - N 42 | /649. BD* ( 1) N 42 - N 43 | 0.56 | 1.27 | 0.034 |
| 60. BD ( 1) C 37 - N 42 | /650. BD* ( 1) N 43 - C 44 | 2.82 | 1.15 | 0.072 |
| 61. BD ( 1) C 38 - C 39 | /372. RY* ( 2) C 33        | 0.42 | 2.43 | 0.040 |
| 61. BD ( 1) C 38 - C 39 | /373. RY* ( 3) C 33        | 0.51 | 2.20 | 0.042 |
| 61. BD ( 1) C 38 - C 39 | /436. RY* ( 2) C 41        | 0.43 | 2.06 | 0.038 |
| 61. BD ( 1) C 38 - C 39 | /437. RY* ( 3) C 41        | 0.41 | 2.11 | 0.037 |
| 61. BD ( 1) C 38 - C 39 | /627. BD* ( 1) C 32 - C 33 | 1.26 | 1.16 | 0.049 |
| 61. BD ( 1) C 38 - C 39 | /632. BD* ( 1) C 33 - C 38 | 1.36 | 1.19 | 0.051 |
| 61. BD ( 1) C 38 - C 39 | /642. BD* ( 1) C 38 - H 52 | 0.83 | 1.19 | 0.040 |
| 61. BD ( 1) C 38 - C 39 | /643. BD* ( 1) C 39 - C 41 | 0.97 | 1.21 | 0.043 |
| 61. BD ( 1) C 38 - C 39 | /644. BD* ( 1) C 39 - H 53 | 0.70 | 1.19 | 0.036 |
| 61. BD ( 1) C 38 - C 39 | /648. BD* ( 1) C 41 - H 55 | 0.76 | 1.19 | 0.038 |
| 62. BD ( 2) C 38 - C 39 | /371. RY* ( 1) C 33        | 0.41 | 0.86 | 0.024 |
| 62. BD ( 2) C 38 - C 39 | /435. RY* ( 1) C 41        | 0.68 | 0.78 | 0.029 |
| 62. BD ( 2) C 38 - C 39 | /628. BD* ( 2) C 32 - C 33 | 3.49 | 0.22 | 0.049 |
| 62. BD ( 2) C 38 - C 39 | /646. BD* ( 2) C 40 - C 41 | 4.14 | 0.30 | 0.052 |
| 63. BD ( 1) C 38 - H 52 | /372. RY* ( 2) C 33        | 0.63 | 2.20 | 0.047 |
| 63. BD ( 1) C 38 - H 52 | /420. RY* ( 2) C 39        | 0.68 | 1.75 | 0.044 |
| 63. BD ( 1) C 38 - H 52 | /631. BD* ( 1) C 33 - C 35 | 1.60 | 1.13 | 0.054 |
| 63. BD ( 1) C 38 - H 52 | /640. BD* ( 1) C 38 - C 39 | 0.70 | 1.16 | 0.036 |
| 63. BD ( 1) C 38 - H 52 | /643. BD* ( 1) C 39 - C 41 | 2.64 | 0.98 | 0.064 |
| 63. BD ( 1) C 38 - H 52 | /644. BD* ( 1) C 39 - H 53 | 0.47 | 0.97 | 0.027 |
| 64. BD ( 1) C 39 - C 41 | /413. RY* ( 3) C 38        | 0.92 | 1.78 | 0.052 |
| 64. BD ( 1) C 39 - C 41 | /429. RY* ( 3) C 40        | 0.91 | 1.77 | 0.051 |
| 64. BD ( 1) C 39 - C 41 | /640. BD* ( 1) C 38 - C 39 | 1.07 | 1.29 | 0.047 |
| 64. BD ( 1) C 39 - C 41 | /642. BD* ( 1) C 38 - H 52 | 1.63 | 1.09 | 0.053 |
| 64. BD ( 1) C 39 - C 41 | /645. BD* ( 1) C 40 - C 41 | 1.15 | 1.30 | 0.049 |
| 64. BD ( 1) C 39 - C 41 | /647. BD* ( 1) C 40 - H 54 | 1.76 | 1.09 | 0.055 |
| 65. BD ( 1) C 39 - H 53 | /411. RY* ( 1) C 38        | 0.76 | 1.69 | 0.045 |
| 65. BD ( 1) C 39 - H 53 | /436. RY* ( 2) C 41        | 0.65 | 1.83 | 0.044 |
| 65. BD ( 1) C 39 - H 53 | /632. BD* ( 1) C 33 - C 38 | 3.27 | 0.95 | 0.071 |
| 65. BD ( 1) C 39 - H 53 | /640. BD* ( 1) C 38 - C 39 | 0.60 | 1.16 | 0.033 |
| 65. BD ( 1) C 39 - H 53 | /642. BD* ( 1) C 38 - H 52 | 0.56 | 0.96 | 0.029 |
| 65. BD ( 1) C 39 - H 53 | /645. BD* ( 1) C 40 - C 41 | 1.37 | 1.16 | 0.051 |
| 65. BD ( 1) C 39 - H 53 | /648. BD* ( 1) C 41 - H 55 | 0.26 | 0.96 | 0.020 |
| 66. BD ( 1) C 40 - C 41 | /388. RY* ( 2) C 35        | 0.62 | 2.30 | 0.048 |
| 66. BD ( 1) C 40 - C 41 | /389. RY* ( 3) C 35        | 0.36 | 2.29 | 0.036 |
| 66. BD ( 1) C 40 - C 41 | /420. RY* ( 2) C 39        | 0.43 | 1.98 | 0.037 |
| 66. BD ( 1) C 40 - C 41 | /421. RY* ( 3) C 39        | 0.39 | 2.10 | 0.036 |
| 66. BD ( 1) C 40 - C 41 | /635. BD* ( 1) C 35 - C 37 | 1.24 | 1.19 | 0.049 |
| 66. BD ( 1) C 40 - C 41 | /636. BD* ( 1) C 35 - C 40 | 1.44 | 1.20 | 0.053 |
| 66. BD ( 1) C 40 - C 41 | /643. BD* ( 1) C 39 - C 41 | 1.01 | 1.21 | 0.044 |
| 66. BD ( 1) C 40 - C 41 | /644. BD* ( 1) C 39 - H 53 | 0.75 | 1.19 | 0.038 |
| 66. BD ( 1) C 40 - C 41 | /647. BD* ( 1) C 40 - H 54 | 0.85 | 1.19 | 0.040 |
| 66. BD ( 1) C 40 - C 41 | /648. BD* ( 1) C 41 - H 55 | 0.74 | 1.19 | 0.038 |
| 67. BD ( 2) C 40 - C 41 | / 56. BD* ( 2) C 35 - C 37 | 3.89 | 0.23 | 0.052 |
| 67. BD ( 2) C 40 - C 41 | /387. RY* ( 1) C 35        | 0.36 | 0.87 | 0.023 |
| 67. BD ( 2) C 40 - C 41 | /419. RY* ( 1) C 39        | 0.67 | 0.77 | 0.029 |
| 67. BD ( 2) C 40 - C 41 | /641. BD* ( 2) C 38 - C 39 | 5.50 | 0.30 | 0.058 |
| 67. BD ( 2) C 40 - C 41 | /646. BD* ( 2) C 40 - C 41 | 0.64 | 0.30 | 0.020 |
| 68. BD ( 1) C 40 - H 54 | /388. RY* ( 2) C 35        | 0.68 | 2.07 | 0.048 |
| 68. BD ( 1) C 40 - H 54 | /436. RY* ( 2) C 41        | 0.69 | 1.83 | 0.045 |
| 68. BD ( 1) C 40 - H 54 | /631. BD* ( 1) C 33 - C 35 | 1.76 | 1.13 | 0.056 |
| 68. BD ( 1) C 40 - H 54 | /643. BD* ( 1) C 39 - C 41 | 2.57 | 0.98 | 0.063 |
| 68. BD ( 1) C 40 - H 54 | /645. BD* ( 1) C 40 - C 41 | 0.75 | 1.17 | 0.037 |
| 68. BD ( 1) C 40 - H 54 | /648. BD* ( 1) C 41 - H 55 | 0.46 | 0.96 | 0.026 |
| 69. BD ( 1) C 41 - H 55 | /420. RY* ( 2) C 39        | 0.51 | 1.74 | 0.038 |
| 69. BD ( 1) C 41 - H 55 | /427. RY* ( 1) C 40        | 0.35 | 1.34 | 0.028 |
| 69. BD ( 1) C 41 - H 55 | /428. RY* ( 2) C 40        | 0.48 | 1.47 | 0.034 |

|                         |                            |      |      |       |
|-------------------------|----------------------------|------|------|-------|
| 69. BD ( 1) C 41 - H 55 | /636. BD* ( 1) C 35 - C 40 | 3.21 | 0.96 | 0.070 |
| 69. BD ( 1) C 41 - H 55 | /640. BD* ( 1) C 38 - C 39 | 1.34 | 1.15 | 0.050 |
| 69. BD ( 1) C 41 - H 55 | /644. BD* ( 1) C 39 - H 53 | 0.26 | 0.96 | 0.020 |
| 69. BD ( 1) C 41 - H 55 | /645. BD* ( 1) C 40 - C 41 | 0.66 | 1.16 | 0.035 |
| 69. BD ( 1) C 41 - H 55 | /647. BD* ( 1) C 40 - H 54 | 0.51 | 0.95 | 0.028 |
| 70. BD ( 1) N 42 - N 43 | /403. RY* ( 1) C 37        | 0.87 | 1.83 | 0.051 |
| 70. BD ( 1) N 42 - N 43 | /459. RY* ( 1) C 44        | 0.76 | 2.15 | 0.051 |
| 70. BD ( 1) N 42 - N 43 | /460. RY* ( 2) C 44        | 0.73 | 2.41 | 0.053 |
| 70. BD ( 1) N 42 - N 43 | /635. BD* ( 1) C 35 - C 37 | 0.25 | 1.44 | 0.024 |
| 70. BD ( 1) N 42 - N 43 | /639. BD* ( 1) C 37 - N 42 | 0.61 | 1.36 | 0.036 |
| 70. BD ( 1) N 42 - N 43 | /650. BD* ( 1) N 43 - C 44 | 0.42 | 1.34 | 0.030 |
| 70. BD ( 1) N 42 - N 43 | /651. BD* ( 1) C 44 - C 45 | 0.57 | 1.43 | 0.036 |
| 71. BD ( 1) N 43 - C 44 | /403. RY* ( 1) C 37        | 0.30 | 1.64 | 0.028 |
| 71. BD ( 1) N 43 - C 44 | /444. RY* ( 2) N 42        | 0.83 | 2.81 | 0.061 |
| 71. BD ( 1) N 43 - C 44 | /445. RY* ( 3) N 42        | 0.67 | 2.13 | 0.048 |
| 71. BD ( 1) N 43 - C 44 | /468. RY* ( 2) C 45        | 0.35 | 2.12 | 0.035 |
| 71. BD ( 1) N 43 - C 44 | /475. RY* ( 1) C 46        | 0.41 | 1.99 | 0.036 |
| 71. BD ( 1) N 43 - C 44 | /639. BD* ( 1) C 37 - N 42 | 2.41 | 1.16 | 0.067 |
| 71. BD ( 1) N 43 - C 44 | /651. BD* ( 1) C 44 - C 45 | 0.30 | 1.24 | 0.025 |
| 71. BD ( 1) N 43 - C 44 | /652. BD* ( 1) C 44 - C 46 | 0.95 | 1.40 | 0.046 |
| 71. BD ( 1) N 43 - C 44 | /654. BD* ( 1) C 45 - C 47 | 0.38 | 1.44 | 0.030 |
| 71. BD ( 1) N 43 - C 44 | /656. BD* ( 1) C 46 - C 48 | 1.20 | 1.24 | 0.049 |
| 72. BD ( 1) C 44 - C 45 | /451. RY* ( 1) N 43        | 0.32 | 1.48 | 0.028 |
| 72. BD ( 1) C 44 - C 45 | /477. RY* ( 3) C 46        | 0.30 | 2.19 | 0.033 |
| 72. BD ( 1) C 44 - C 45 | /478. RY* ( 4) C 46        | 0.26 | 1.69 | 0.027 |
| 72. BD ( 1) C 44 - C 45 | /484. RY* ( 2) C 47        | 0.38 | 1.89 | 0.034 |
| 72. BD ( 1) C 44 - C 45 | /485. RY* ( 3) C 47        | 0.68 | 2.04 | 0.047 |
| 72. BD ( 1) C 44 - C 45 | /649. BD* ( 1) N 42 - N 43 | 1.57 | 1.13 | 0.053 |
| 72. BD ( 1) C 44 - C 45 | /650. BD* ( 1) N 43 - C 44 | 0.39 | 1.00 | 0.025 |
| 72. BD ( 1) C 44 - C 45 | /652. BD* ( 1) C 44 - C 46 | 1.82 | 1.25 | 0.060 |
| 72. BD ( 1) C 44 - C 45 | /654. BD* ( 1) C 45 - C 47 | 0.85 | 1.29 | 0.042 |
| 72. BD ( 1) C 44 - C 45 | /657. BD* ( 1) C 46 - O 62 | 2.57 | 0.97 | 0.063 |
| 72. BD ( 1) C 44 - C 45 | /659. BD* ( 1) C 47 - H 57 | 1.39 | 1.10 | 0.050 |
| 73. BD ( 1) C 44 - C 46 | /453. RY* ( 3) N 43        | 0.32 | 1.86 | 0.031 |
| 73. BD ( 1) C 44 - C 46 | /468. RY* ( 2) C 45        | 0.42 | 2.09 | 0.037 |
| 73. BD ( 1) C 44 - C 46 | /492. RY* ( 2) C 48        | 0.61 | 2.10 | 0.046 |
| 73. BD ( 1) C 44 - C 46 | /650. BD* ( 1) N 43 - C 44 | 0.68 | 1.13 | 0.035 |
| 73. BD ( 1) C 44 - C 46 | /651. BD* ( 1) C 44 - C 45 | 1.78 | 1.21 | 0.059 |
| 73. BD ( 1) C 44 - C 46 | /655. BD* ( 1) C 45 - H 56 | 0.55 | 1.21 | 0.033 |
| 73. BD ( 1) C 44 - C 46 | /656. BD* ( 1) C 46 - C 48 | 1.45 | 1.21 | 0.053 |
| 73. BD ( 1) C 44 - C 46 | /657. BD* ( 1) C 46 - O 62 | 0.34 | 1.09 | 0.024 |
| 73. BD ( 1) C 44 - C 46 | /661. BD* ( 1) C 48 - H 58 | 0.57 | 1.22 | 0.033 |
| 74. BD ( 2) C 44 - C 46 | / 79. BD* ( 1) C 47 - C 48 | 0.75 | 0.13 | 0.053 |
| 74. BD ( 2) C 44 - C 46 | /452. RY* ( 2) N 43        | 0.27 | 1.13 | 0.022 |
| 74. BD ( 2) C 44 - C 46 | /467. RY* ( 1) C 45        | 0.70 | 0.80 | 0.030 |
| 74. BD ( 2) C 44 - C 46 | /491. RY* ( 1) C 48        | 1.14 | 0.81 | 0.039 |
| 74. BD ( 2) C 44 - C 46 | /537. RY* ( 1) O 62        | 0.37 | 1.36 | 0.029 |
| 74. BD ( 2) C 44 - C 46 | /653. BD* ( 2) C 44 - C 46 | 0.57 | 0.32 | 0.019 |
| 75. BD ( 1) C 45 - C 47 | /460. RY* ( 2) C 44        | 0.98 | 2.17 | 0.058 |
| 75. BD ( 1) C 45 - C 47 | /499. RY* ( 1) C 49        | 0.54 | 1.96 | 0.041 |
| 75. BD ( 1) C 45 - C 47 | /501. RY* ( 3) C 49        | 0.44 | 2.06 | 0.038 |
| 75. BD ( 1) C 45 - C 47 | /650. BD* ( 1) N 43 - C 44 | 1.44 | 1.11 | 0.051 |
| 75. BD ( 1) C 45 - C 47 | /651. BD* ( 1) C 44 - C 45 | 0.83 | 1.20 | 0.040 |
| 75. BD ( 1) C 45 - C 47 | /655. BD* ( 1) C 45 - H 56 | 0.64 | 1.20 | 0.035 |
| 75. BD ( 1) C 45 - C 47 | /658. BD* ( 1) C 47 - C 49 | 0.82 | 1.22 | 0.040 |
| 75. BD ( 1) C 45 - C 47 | /659. BD* ( 1) C 47 - H 57 | 0.52 | 1.21 | 0.032 |
| 75. BD ( 1) C 45 - C 47 | /662. BD* ( 1) C 49 - H 59 | 0.83 | 1.22 | 0.040 |
| 76. BD ( 1) C 45 - H 56 | /459. RY* ( 1) C 44        | 0.41 | 1.67 | 0.033 |
| 76. BD ( 1) C 45 - H 56 | /484. RY* ( 2) C 47        | 0.61 | 1.75 | 0.041 |
| 76. BD ( 1) C 45 - H 56 | /650. BD* ( 1) N 43 - C 44 | 0.37 | 0.86 | 0.023 |
| 76. BD ( 1) C 45 - H 56 | /652. BD* ( 1) C 44 - C 46 | 1.74 | 1.11 | 0.056 |
| 76. BD ( 1) C 45 - H 56 | /654. BD* ( 1) C 45 - C 47 | 0.49 | 1.15 | 0.030 |
| 76. BD ( 1) C 45 - H 56 | /658. BD* ( 1) C 47 - C 49 | 2.70 | 0.98 | 0.065 |
| 76. BD ( 1) C 45 - H 56 | /659. BD* ( 1) C 47 - H 57 | 0.54 | 0.96 | 0.029 |
| 77. BD ( 1) C 46 - C 48 | /459. RY* ( 1) C 44        | 0.56 | 1.82 | 0.041 |
| 77. BD ( 1) C 46 - C 48 | /499. RY* ( 1) C 49        | 0.34 | 1.86 | 0.032 |
| 77. BD ( 1) C 46 - C 48 | /501. RY* ( 3) C 49        | 0.77 | 1.96 | 0.049 |
| 77. BD ( 1) C 46 - C 48 | /650. BD* ( 1) N 43 - C 44 | 2.78 | 1.01 | 0.067 |
| 77. BD ( 1) C 46 - C 48 | /652. BD* ( 1) C 44 - C 46 | 1.66 | 1.25 | 0.058 |
| 77. BD ( 1) C 46 - C 48 | /660. BD* ( 1) C 48 - C 49 | 0.94 | 1.30 | 0.044 |
| 77. BD ( 1) C 46 - C 48 | /662. BD* ( 1) C 49 - H 59 | 1.54 | 1.11 | 0.052 |

|                          |                            |        |       |       |
|--------------------------|----------------------------|--------|-------|-------|
| 78. BD ( 1) C 46 - O 62  | /459. RY* ( 1) C 44        | 0.29   | 2.01  | 0.030 |
| 78. BD ( 1) C 46 - O 62  | /475. RY* ( 1) C 46        | 0.48   | 2.04  | 0.039 |
| 78. BD ( 1) C 46 - O 62  | /651. BD* ( 1) C 44 - C 45 | 1.29   | 1.29  | 0.052 |
| 78. BD ( 1) C 46 - O 62  | /652. BD* ( 1) C 44 - C 46 | 0.66   | 1.45  | 0.039 |
| 78. BD ( 1) C 46 - O 62  | /660. BD* ( 1) C 48 - C 49 | 0.46   | 1.50  | 0.033 |
| 79. BD* ( 1) C 47 - C 48 | /160. LP ( 1) C 49         | 2.31   | 0.07  | 0.022 |
| 79. BD* ( 1) C 47 - C 48 | /467. RY* ( 1) C 45        | 1.54   | 0.67  | 0.041 |
| 79. BD* ( 1) C 47 - C 48 | /476. RY* ( 2) C 46        | 0.27   | 0.81  | 0.019 |
| 79. BD* ( 1) C 47 - C 48 | /653. BD* ( 2) C 44 - C 46 | 5.29   | 0.19  | 0.045 |
| 80. BD ( 1) C 47 - C 48  | /160. LP ( 1) C 49         | 655.99 | 0.03  | 0.187 |
| 80. BD ( 1) C 47 - C 48  | /467. RY* ( 1) C 45        | 0.70   | 0.63  | 0.036 |
| 80. BD ( 1) C 47 - C 48  | /500. RY* ( 2) C 49        | 1.55   | 0.66  | 0.055 |
| 80. BD ( 1) C 47 - C 48  | /653. BD* ( 2) C 44 - C 46 | 10.95  | 0.15  | 0.059 |
| 81. BD ( 1) C 47 - C 49  | /469. RY* ( 3) C 45        | 0.83   | 1.95  | 0.051 |
| 81. BD ( 1) C 47 - C 49  | /493. RY* ( 3) C 48        | 0.82   | 1.93  | 0.050 |
| 81. BD ( 1) C 47 - C 49  | /654. BD* ( 1) C 45 - C 47 | 0.86   | 1.28  | 0.042 |
| 81. BD ( 1) C 47 - C 49  | /655. BD* ( 1) C 45 - H 56 | 1.58   | 1.08  | 0.052 |
| 81. BD ( 1) C 47 - C 49  | /660. BD* ( 1) C 48 - C 49 | 1.04   | 1.29  | 0.046 |
| 81. BD ( 1) C 47 - C 49  | /661. BD* ( 1) C 48 - H 58 | 1.54   | 1.09  | 0.052 |
| 81. BD ( 1) C 47 - C 49  | /662. BD* ( 1) C 49 - H 59 | 0.27   | 1.10  | 0.022 |
| 82. BD ( 1) C 47 - H 57  | /468. RY* ( 2) C 45        | 0.75   | 1.83  | 0.047 |
| 82. BD ( 1) C 47 - H 57  | /499. RY* ( 1) C 49        | 0.64   | 1.71  | 0.042 |
| 82. BD ( 1) C 47 - H 57  | /651. BD* ( 1) C 44 - C 45 | 3.00   | 0.95  | 0.067 |
| 82. BD ( 1) C 47 - H 57  | /654. BD* ( 1) C 45 - C 47 | 0.41   | 1.15  | 0.028 |
| 82. BD ( 1) C 47 - H 57  | /655. BD* ( 1) C 45 - H 56 | 0.55   | 0.95  | 0.029 |
| 82. BD ( 1) C 47 - H 57  | /660. BD* ( 1) C 48 - C 49 | 1.45   | 1.16  | 0.052 |
| 82. BD ( 1) C 47 - H 57  | /662. BD* ( 1) C 49 - H 59 | 0.26   | 0.97  | 0.020 |
| 83. BD ( 1) C 48 - C 49  | /475. RY* ( 1) C 46        | 0.57   | 1.93  | 0.042 |
| 83. BD ( 1) C 48 - C 49  | /477. RY* ( 3) C 46        | 0.47   | 2.28  | 0.042 |
| 83. BD ( 1) C 48 - C 49  | /484. RY* ( 2) C 47        | 0.50   | 1.98  | 0.040 |
| 83. BD ( 1) C 48 - C 49  | /485. RY* ( 3) C 47        | 0.37   | 2.14  | 0.036 |
| 83. BD ( 1) C 48 - C 49  | /656. BD* ( 1) C 46 - C 48 | 0.76   | 1.19  | 0.038 |
| 83. BD ( 1) C 48 - C 49  | /657. BD* ( 1) C 46 - O 62 | 1.26   | 1.06  | 0.046 |
| 83. BD ( 1) C 48 - C 49  | /658. BD* ( 1) C 47 - C 49 | 0.98   | 1.21  | 0.043 |
| 83. BD ( 1) C 48 - C 49  | /659. BD* ( 1) C 47 - H 57 | 0.71   | 1.20  | 0.037 |
| 83. BD ( 1) C 48 - C 49  | /661. BD* ( 1) C 48 - H 58 | 0.76   | 1.19  | 0.038 |
| 83. BD ( 1) C 48 - C 49  | /662. BD* ( 1) C 49 - H 59 | 0.71   | 1.21  | 0.037 |
| 84. BD ( 1) C 48 - H 58  | /475. RY* ( 1) C 46        | 0.38   | 1.69  | 0.032 |
| 84. BD ( 1) C 48 - H 58  | /499. RY* ( 1) C 49        | 0.66   | 1.71  | 0.043 |
| 84. BD ( 1) C 48 - H 58  | /652. BD* ( 1) C 44 - C 46 | 1.61   | 1.11  | 0.053 |
| 84. BD ( 1) C 48 - H 58  | /657. BD* ( 1) C 46 - O 62 | 0.52   | 0.82  | 0.026 |
| 84. BD ( 1) C 48 - H 58  | /658. BD* ( 1) C 47 - C 49 | 2.88   | 0.98  | 0.067 |
| 84. BD ( 1) C 48 - H 58  | /660. BD* ( 1) C 48 - C 49 | 0.63   | 1.16  | 0.034 |
| 84. BD ( 1) C 48 - H 58  | /662. BD* ( 1) C 49 - H 59 | 0.52   | 0.97  | 0.028 |
| 85. BD ( 1) C 49 - H 59  | /484. RY* ( 2) C 47        | 0.58   | 1.74  | 0.040 |
| 85. BD ( 1) C 49 - H 59  | /492. RY* ( 2) C 48        | 0.75   | 1.83  | 0.047 |
| 85. BD ( 1) C 49 - H 59  | /654. BD* ( 1) C 45 - C 47 | 1.28   | 1.14  | 0.049 |
| 85. BD ( 1) C 49 - H 59  | /656. BD* ( 1) C 46 - C 48 | 2.85   | 0.95  | 0.066 |
| 85. BD ( 1) C 49 - H 59  | /660. BD* ( 1) C 48 - C 49 | 0.62   | 1.16  | 0.034 |
| 85. BD ( 1) C 49 - H 59  | /661. BD* ( 1) C 48 - H 58 | 0.48   | 0.95  | 0.027 |
| 86. BD ( 1) O 50 - H 60  | /363. RY* ( 1) C 32        | 0.74   | 1.57  | 0.043 |
| 86. BD ( 1) O 50 - H 60  | /364. RY* ( 2) C 32        | 0.78   | 1.60  | 0.045 |
| 86. BD ( 1) O 50 - H 60  | /629. BD* ( 1) C 32 - C 34 | 1.60   | 1.34  | 0.058 |
| 109. CR ( 1) C 32        | /372. RY* ( 2) C 33        | 0.54   | 11.81 | 0.101 |
| 109. CR ( 1) C 32        | /381. RY* ( 3) C 34        | 1.06   | 11.47 | 0.139 |
| 109. CR ( 1) C 32        | /629. BD* ( 1) C 32 - C 34 | 0.90   | 10.73 | 0.125 |
| 109. CR ( 1) C 32        | /630. BD* ( 1) C 32 - O 50 | 0.66   | 10.40 | 0.105 |
| 109. CR ( 1) C 32        | /631. BD* ( 1) C 33 - C 35 | 0.29   | 10.74 | 0.071 |
| 109. CR ( 1) C 32        | /632. BD* ( 1) C 33 - C 38 | 0.31   | 10.57 | 0.072 |
| 109. CR ( 1) C 32        | /633. BD* ( 1) C 34 - C 36 | 0.40   | 10.58 | 0.082 |
| 110. CR ( 1) C 33        | /364. RY* ( 2) C 32        | 0.30   | 10.93 | 0.072 |
| 110. CR ( 1) C 33        | /389. RY* ( 3) C 35        | 1.17   | 11.61 | 0.147 |
| 110. CR ( 1) C 33        | /413. RY* ( 3) C 38        | 0.52   | 11.20 | 0.096 |
| 110. CR ( 1) C 33        | /629. BD* ( 1) C 32 - C 34 | 0.27   | 10.67 | 0.069 |
| 110. CR ( 1) C 33        | /631. BD* ( 1) C 33 - C 35 | 0.63   | 10.68 | 0.104 |
| 110. CR ( 1) C 33        | /635. BD* ( 1) C 35 - C 37 | 0.57   | 10.51 | 0.099 |
| 110. CR ( 1) C 33        | /636. BD* ( 1) C 35 - C 40 | 0.50   | 10.52 | 0.092 |
| 110. CR ( 1) C 33        | /640. BD* ( 1) C 38 - C 39 | 0.27   | 10.71 | 0.068 |
| 111. CR ( 1) C 34        | /365. RY* ( 3) C 32        | 1.48   | 11.50 | 0.165 |
| 111. CR ( 1) C 34        | /398. RY* ( 4) C 36        | 0.45   | 11.22 | 0.090 |
| 111. CR ( 1) C 34        | /516. RY* ( 2) H 51        | 0.29   | 12.28 | 0.075 |

|                   |                            |      |       |       |
|-------------------|----------------------------|------|-------|-------|
| 111. CR ( 1) C 34 | /627. BD* ( 1) C 32 - C 33 | 0.59 | 10.47 | 0.101 |
| 111. CR ( 1) C 34 | /629. BD* ( 1) C 32 - C 34 | 0.29 | 10.66 | 0.070 |
| 111. CR ( 1) C 34 | /630. BD* ( 1) C 32 - O 50 | 0.36 | 10.32 | 0.077 |
| 111. CR ( 1) C 34 | /637. BD* ( 1) C 36 - C 37 | 0.30 | 10.68 | 0.072 |
| 112. CR ( 1) C 35 | /373. RY* ( 3) C 33        | 1.24 | 11.51 | 0.151 |
| 112. CR ( 1) C 35 | /405. RY* ( 3) C 37        | 0.66 | 11.12 | 0.108 |
| 112. CR ( 1) C 35 | /429. RY* ( 3) C 40        | 0.57 | 11.18 | 0.101 |
| 112. CR ( 1) C 35 | /627. BD* ( 1) C 32 - C 33 | 0.51 | 10.47 | 0.093 |
| 112. CR ( 1) C 35 | /631. BD* ( 1) C 33 - C 35 | 0.50 | 10.67 | 0.093 |
| 112. CR ( 1) C 35 | /632. BD* ( 1) C 33 - C 38 | 0.46 | 10.50 | 0.088 |
| 112. CR ( 1) C 35 | /637. BD* ( 1) C 36 - C 37 | 0.32 | 10.69 | 0.075 |
| 112. CR ( 1) C 35 | /639. BD* ( 1) C 37 - N 42 | 0.27 | 10.42 | 0.068 |
| 112. CR ( 1) C 35 | /645. BD* ( 1) C 40 - C 41 | 0.28 | 10.71 | 0.070 |
| 113. CR ( 1) C 36 | /404. RY* ( 2) C 37        | 0.36 | 11.13 | 0.080 |
| 113. CR ( 1) C 36 | /405. RY* ( 3) C 37        | 1.07 | 11.10 | 0.137 |
| 113. CR ( 1) C 36 | /406. RY* ( 4) C 37        | 0.36 | 11.09 | 0.080 |
| 113. CR ( 1) C 36 | /536. RY* ( 2) H 61        | 0.29 | 12.37 | 0.076 |
| 113. CR ( 1) C 36 | /629. BD* ( 1) C 32 - C 34 | 0.28 | 10.64 | 0.069 |
| 113. CR ( 1) C 36 | /635. BD* ( 1) C 35 - C 37 | 0.64 | 10.48 | 0.105 |
| 113. CR ( 1) C 36 | /637. BD* ( 1) C 36 - C 37 | 0.45 | 10.66 | 0.088 |
| 113. CR ( 1) C 36 | /639. BD* ( 1) C 37 - N 42 | 0.44 | 10.40 | 0.086 |
| 114. CR ( 1) C 37 | /388. RY* ( 2) C 35        | 0.61 | 11.65 | 0.106 |
| 114. CR ( 1) C 37 | /397. RY* ( 3) C 36        | 1.16 | 11.26 | 0.144 |
| 114. CR ( 1) C 37 | /631. BD* ( 1) C 33 - C 35 | 0.35 | 10.71 | 0.077 |
| 114. CR ( 1) C 37 | /633. BD* ( 1) C 34 - C 36 | 0.43 | 10.55 | 0.085 |
| 114. CR ( 1) C 37 | /636. BD* ( 1) C 35 - C 40 | 0.33 | 10.55 | 0.075 |
| 114. CR ( 1) C 37 | /637. BD* ( 1) C 36 - C 37 | 0.70 | 10.72 | 0.110 |
| 114. CR ( 1) C 37 | /649. BD* ( 1) N 42 - N 43 | 0.37 | 10.56 | 0.080 |
| 115. CR ( 1) C 38 | /372. RY* ( 2) C 33        | 0.31 | 11.72 | 0.076 |
| 115. CR ( 1) C 38 | /421. RY* ( 3) C 39        | 1.06 | 11.39 | 0.139 |
| 115. CR ( 1) C 38 | /518. RY* ( 2) H 52        | 0.28 | 12.27 | 0.074 |
| 115. CR ( 1) C 38 | /627. BD* ( 1) C 32 - C 33 | 0.32 | 10.45 | 0.074 |
| 115. CR ( 1) C 38 | /631. BD* ( 1) C 33 - C 35 | 0.36 | 10.65 | 0.078 |
| 115. CR ( 1) C 38 | /640. BD* ( 1) C 38 - C 39 | 0.40 | 10.68 | 0.082 |
| 115. CR ( 1) C 38 | /643. BD* ( 1) C 39 - C 41 | 0.49 | 10.50 | 0.091 |
| 116. CR ( 1) C 39 | /411. RY* ( 1) C 38        | 0.37 | 11.21 | 0.082 |
| 116. CR ( 1) C 39 | /413. RY* ( 3) C 38        | 0.65 | 11.17 | 0.108 |
| 116. CR ( 1) C 39 | /414. RY* ( 4) C 38        | 0.39 | 11.05 | 0.083 |
| 116. CR ( 1) C 39 | /437. RY* ( 3) C 41        | 0.38 | 11.40 | 0.083 |
| 116. CR ( 1) C 39 | /520. RY* ( 2) H 53        | 0.30 | 11.90 | 0.075 |
| 116. CR ( 1) C 39 | /632. BD* ( 1) C 33 - C 38 | 0.61 | 10.48 | 0.101 |
| 116. CR ( 1) C 39 | /640. BD* ( 1) C 38 - C 39 | 0.39 | 10.68 | 0.082 |
| 116. CR ( 1) C 39 | /645. BD* ( 1) C 40 - C 41 | 0.29 | 10.69 | 0.070 |
| 117. CR ( 1) C 40 | /389. RY* ( 3) C 35        | 0.37 | 11.58 | 0.083 |
| 117. CR ( 1) C 40 | /437. RY* ( 3) C 41        | 1.06 | 11.40 | 0.139 |
| 117. CR ( 1) C 40 | /631. BD* ( 1) C 33 - C 35 | 0.42 | 10.65 | 0.084 |
| 117. CR ( 1) C 40 | /635. BD* ( 1) C 35 - C 37 | 0.34 | 10.47 | 0.077 |
| 117. CR ( 1) C 40 | /643. BD* ( 1) C 39 - C 41 | 0.50 | 10.50 | 0.091 |
| 117. CR ( 1) C 40 | /645. BD* ( 1) C 40 - C 41 | 0.39 | 10.69 | 0.081 |
| 118. CR ( 1) C 41 | /421. RY* ( 3) C 39        | 0.39 | 11.38 | 0.084 |
| 118. CR ( 1) C 41 | /429. RY* ( 3) C 40        | 0.54 | 11.15 | 0.098 |
| 118. CR ( 1) C 41 | /430. RY* ( 4) C 40        | 0.55 | 11.10 | 0.099 |
| 118. CR ( 1) C 41 | /524. RY* ( 2) H 55        | 0.33 | 12.30 | 0.081 |
| 118. CR ( 1) C 41 | /636. BD* ( 1) C 35 - C 40 | 0.62 | 10.48 | 0.102 |
| 118. CR ( 1) C 41 | /640. BD* ( 1) C 38 - C 39 | 0.29 | 10.67 | 0.070 |
| 118. CR ( 1) C 41 | /645. BD* ( 1) C 40 - C 41 | 0.43 | 10.68 | 0.086 |
| 119. CR ( 1) N 42 | /403. RY* ( 1) C 37        | 0.35 | 15.06 | 0.092 |
| 119. CR ( 1) N 42 | /404. RY* ( 2) C 37        | 0.83 | 15.32 | 0.142 |
| 119. CR ( 1) N 42 | /453. RY* ( 3) N 43        | 0.83 | 15.31 | 0.143 |
| 119. CR ( 1) N 42 | /635. BD* ( 1) C 35 - C 37 | 0.26 | 14.66 | 0.079 |
| 119. CR ( 1) N 42 | /637. BD* ( 1) C 36 - C 37 | 0.26 | 14.85 | 0.079 |
| 119. CR ( 1) N 42 | /650. BD* ( 1) N 43 - C 44 | 0.69 | 14.57 | 0.128 |
| 120. CR ( 1) N 43 | /445. RY* ( 3) N 42        | 0.93 | 15.59 | 0.152 |
| 120. CR ( 1) N 43 | /459. RY* ( 1) C 44        | 0.65 | 15.42 | 0.126 |
| 120. CR ( 1) N 43 | /460. RY* ( 2) C 44        | 0.33 | 15.68 | 0.091 |
| 120. CR ( 1) N 43 | /639. BD* ( 1) C 37 - N 42 | 0.61 | 14.63 | 0.120 |
| 120. CR ( 1) N 43 | /652. BD* ( 1) C 44 - C 46 | 0.34 | 14.86 | 0.090 |
| 121. CR ( 1) C 44 | /469. RY* ( 3) C 45        | 0.42 | 11.42 | 0.088 |
| 121. CR ( 1) C 44 | /475. RY* ( 1) C 46        | 0.56 | 11.30 | 0.101 |
| 121. CR ( 1) C 44 | /477. RY* ( 3) C 46        | 0.99 | 11.64 | 0.136 |
| 121. CR ( 1) C 44 | /649. BD* ( 1) N 42 - N 43 | 0.46 | 10.58 | 0.089 |

|                   |                            |       |       |       |
|-------------------|----------------------------|-------|-------|-------|
| 121. CR ( 1) C 44 | /652. BD* ( 1) C 44 - C 46 | 0.62  | 10.71 | 0.104 |
| 121. CR ( 1) C 44 | /656. BD* ( 1) C 46 - C 48 | 0.47  | 10.55 | 0.089 |
| 121. CR ( 1) C 44 | /657. BD* ( 1) C 46 - O 62 | 0.39  | 10.42 | 0.081 |
| 122. CR ( 1) C 45 | /459. RY* ( 1) C 44        | 0.42  | 11.19 | 0.087 |
| 122. CR ( 1) C 45 | /461. RY* ( 3) C 44        | 0.28  | 10.86 | 0.069 |
| 122. CR ( 1) C 45 | /485. RY* ( 3) C 47        | 0.99  | 11.42 | 0.134 |
| 122. CR ( 1) C 45 | /526. RY* ( 2) H 56        | 0.30  | 12.30 | 0.077 |
| 122. CR ( 1) C 45 | /650. BD* ( 1) N 43 - C 44 | 0.26  | 10.38 | 0.067 |
| 122. CR ( 1) C 45 | /652. BD* ( 1) C 44 - C 46 | 0.39  | 10.63 | 0.082 |
| 122. CR ( 1) C 45 | /654. BD* ( 1) C 45 - C 47 | 0.39  | 10.67 | 0.082 |
| 122. CR ( 1) C 45 | /658. BD* ( 1) C 47 - C 49 | 0.45  | 10.50 | 0.087 |
| 123. CR ( 1) C 46 | /460. RY* ( 2) C 44        | 1.55  | 11.53 | 0.169 |
| 123. CR ( 1) C 46 | /493. RY* ( 3) C 48        | 0.48  | 11.40 | 0.093 |
| 123. CR ( 1) C 46 | /650. BD* ( 1) N 43 - C 44 | 0.47  | 10.47 | 0.089 |
| 123. CR ( 1) C 46 | /651. BD* ( 1) C 44 - C 45 | 0.49  | 10.55 | 0.091 |
| 123. CR ( 1) C 46 | /652. BD* ( 1) C 44 - C 46 | 0.84  | 10.71 | 0.121 |
| 123. CR ( 1) C 46 | /657. BD* ( 1) C 46 - O 62 | 0.43  | 10.43 | 0.085 |
| 123. CR ( 1) C 46 | /660. BD* ( 1) C 48 - C 49 | 0.26  | 10.76 | 0.067 |
| 124. CR ( 1) C 47 | /468. RY* ( 2) C 45        | 0.26  | 11.36 | 0.069 |
| 124. CR ( 1) C 47 | /469. RY* ( 3) C 45        | 0.76  | 11.34 | 0.117 |
| 124. CR ( 1) C 47 | /470. RY* ( 4) C 45        | 0.27  | 10.96 | 0.068 |
| 124. CR ( 1) C 47 | /501. RY* ( 3) C 49        | 0.49  | 11.34 | 0.094 |
| 124. CR ( 1) C 47 | /528. RY* ( 2) H 57        | 0.30  | 11.94 | 0.076 |
| 124. CR ( 1) C 47 | /651. BD* ( 1) C 44 - C 45 | 0.48  | 10.48 | 0.090 |
| 124. CR ( 1) C 47 | /654. BD* ( 1) C 45 - C 47 | 0.31  | 10.67 | 0.073 |
| 124. CR ( 1) C 47 | /660. BD* ( 1) C 48 - C 49 | 0.29  | 10.69 | 0.071 |
| 125. CR ( 1) C 48 | /477. RY* ( 3) C 46        | 0.44  | 11.56 | 0.091 |
| 125. CR ( 1) C 48 | /478. RY* ( 4) C 46        | 0.41  | 11.06 | 0.085 |
| 125. CR ( 1) C 48 | /501. RY* ( 3) C 49        | 1.07  | 11.33 | 0.139 |
| 125. CR ( 1) C 48 | /530. RY* ( 2) H 58        | 0.29  | 12.31 | 0.075 |
| 125. CR ( 1) C 48 | /652. BD* ( 1) C 44 - C 46 | 0.39  | 10.63 | 0.083 |
| 125. CR ( 1) C 48 | /658. BD* ( 1) C 47 - C 49 | 0.50  | 10.50 | 0.092 |
| 125. CR ( 1) C 48 | /660. BD* ( 1) C 48 - C 49 | 0.46  | 10.68 | 0.088 |
| 126. CR ( 1) C 49 | /485. RY* ( 3) C 47        | 0.41  | 11.43 | 0.086 |
| 126. CR ( 1) C 49 | /492. RY* ( 2) C 48        | 0.35  | 11.36 | 0.080 |
| 126. CR ( 1) C 49 | /493. RY* ( 3) C 48        | 0.72  | 11.32 | 0.114 |
| 126. CR ( 1) C 49 | /532. RY* ( 2) H 59        | 0.32  | 11.97 | 0.078 |
| 126. CR ( 1) C 49 | /654. BD* ( 1) C 45 - C 47 | 0.27  | 10.67 | 0.067 |
| 126. CR ( 1) C 49 | /656. BD* ( 1) C 46 - C 48 | 0.49  | 10.48 | 0.091 |
| 126. CR ( 1) C 49 | /660. BD* ( 1) C 48 - C 49 | 0.32  | 10.69 | 0.074 |
| 127. CR ( 1) O 50 | /363. RY* ( 1) C 32        | 0.60  | 19.81 | 0.138 |
| 127. CR ( 1) O 50 | /364. RY* ( 2) C 32        | 0.47  | 19.84 | 0.123 |
| 127. CR ( 1) O 50 | /534. RY* ( 2) H 60        | 0.30  | 20.87 | 0.101 |
| 128. CR ( 1) O 62 | /475. RY* ( 1) C 46        | 1.36  | 20.11 | 0.209 |
| 128. CR ( 1) O 62 | /652. BD* ( 1) C 44 - C 46 | 0.28  | 19.53 | 0.095 |
| 155. LP ( 1) N 42 | /451. RY* ( 1) N 43        | 0.73  | 1.14  | 0.037 |
| 155. LP ( 1) N 42 | /452. RY* ( 2) N 43        | 0.90  | 1.13  | 0.041 |
| 155. LP ( 1) N 42 | /635. BD* ( 1) C 35 - C 37 | 3.47  | 0.75  | 0.065 |
| 155. LP ( 1) N 42 | /637. BD* ( 1) C 36 - C 37 | 3.29  | 0.94  | 0.071 |
| 156. LP ( 2) N 42 | / 56. BD* ( 2) C 35 - C 37 | 2.21  | 0.42  | 0.050 |
| 156. LP ( 2) N 42 | /403. RY* ( 1) C 37        | 0.62  | 1.31  | 0.038 |
| 156. LP ( 2) N 42 | /444. RY* ( 2) N 42        | 1.08  | 2.47  | 0.070 |
| 156. LP ( 2) N 42 | /445. RY* ( 3) N 42        | 0.63  | 1.79  | 0.045 |
| 156. LP ( 2) N 42 | /452. RY* ( 2) N 43        | 0.31  | 1.29  | 0.027 |
| 156. LP ( 2) N 42 | /635. BD* ( 1) C 35 - C 37 | 0.99  | 0.91  | 0.040 |
| 157. LP ( 1) N 43 | /444. RY* ( 2) N 42        | 0.29  | 2.46  | 0.034 |
| 157. LP ( 1) N 43 | /445. RY* ( 3) N 42        | 0.34  | 1.78  | 0.031 |
| 157. LP ( 1) N 43 | /459. RY* ( 1) C 44        | 0.82  | 1.61  | 0.046 |
| 157. LP ( 1) N 43 | /651. BD* ( 1) C 44 - C 45 | 0.57  | 0.89  | 0.028 |
| 157. LP ( 1) N 43 | /652. BD* ( 1) C 44 - C 46 | 3.46  | 1.05  | 0.076 |
| 158. LP ( 2) N 43 | /443. RY* ( 1) N 42        | 1.35  | 1.17  | 0.053 |
| 158. LP ( 2) N 43 | /462. RY* ( 4) C 44        | 0.27  | 1.01  | 0.022 |
| 158. LP ( 2) N 43 | /653. BD* ( 2) C 44 - C 46 | 16.07 | 0.32  | 0.097 |
| 159. LP ( 1) C 45 | /160. LP ( 1) C 49         | 1.21  | 0.07  | 0.014 |
| 159. LP ( 1) C 45 | /483. RY* ( 1) C 47        | 2.83  | 0.66  | 0.059 |
| 159. LP ( 1) C 45 | /653. BD* ( 2) C 44 - C 46 | 30.50 | 0.19  | 0.098 |
| 160. LP ( 1) C 49 | /483. RY* ( 1) C 47        | 0.98  | 0.60  | 0.043 |
| 160. LP ( 1) C 49 | /491. RY* ( 1) C 48        | 1.94  | 0.62  | 0.061 |
| 160. LP ( 1) C 49 | /500. RY* ( 2) C 49        | 1.43  | 0.62  | 0.053 |
| 161. LP ( 1) O 50 | /363. RY* ( 1) C 32        | 0.78  | 1.45  | 0.043 |
| 161. LP ( 1) O 50 | /364. RY* ( 2) C 32        | 0.68  | 1.47  | 0.040 |

|                           |                            |       |      |       |
|---------------------------|----------------------------|-------|------|-------|
| 161. LP ( 1) O 50         | /627. BD* ( 1) C 32 - C 33 | 3.23  | 1.02 | 0.073 |
| 162. LP ( 2) O 50         | /628. BD* ( 2) C 32 - C 33 | 7.23  | 0.29 | 0.080 |
| 163. LP ( 1) O 62         | /475. RY* ( 1) C 46        | 1.06  | 1.80 | 0.055 |
| 163. LP ( 1) O 62         | /652. BD* ( 1) C 44 - C 46 | 2.86  | 1.21 | 0.074 |
| 164. LP ( 2) O 62         | /652. BD* ( 1) C 44 - C 46 | 0.54  | 0.96 | 0.029 |
| 164. LP ( 2) O 62         | /653. BD* ( 2) C 44 - C 46 | 4.33  | 0.37 | 0.056 |
| 164. LP ( 2) O 62         | /656. BD* ( 1) C 46 - C 48 | 1.86  | 0.80 | 0.049 |
| 165. LP ( 3) O 62         | /444. RY* ( 2) N 42        | 0.29  | 2.43 | 0.036 |
| 165. LP ( 3) O 62         | /475. RY* ( 1) C 46        | 0.27  | 1.61 | 0.028 |
| 165. LP ( 3) O 62         | /538. RY* ( 2) O 62        | 0.37  | 2.28 | 0.040 |
| 165. LP ( 3) O 62         | /539. RY* ( 3) O 62        | 0.32  | 2.04 | 0.035 |
| 165. LP ( 3) O 62         | /653. BD* ( 2) C 44 - C 46 | 3.78  | 0.43 | 0.053 |
| 165. LP ( 3) O 62         | /656. BD* ( 1) C 46 - C 48 | 2.17  | 0.86 | 0.058 |
| 628. BD* ( 2) C 32 - C 33 | /363. RY* ( 1) C 32        | 0.33  | 0.89 | 0.030 |
| 628. BD* ( 2) C 32 - C 33 | /364. RY* ( 2) C 32        | 0.40  | 0.92 | 0.034 |
| 628. BD* ( 2) C 32 - C 33 | /371. RY* ( 1) C 33        | 0.91  | 0.64 | 0.042 |
| 628. BD* ( 2) C 32 - C 33 | /379. RY* ( 1) C 34        | 1.05  | 0.54 | 0.042 |
| 628. BD* ( 2) C 32 - C 33 | /387. RY* ( 1) C 35        | 0.56  | 0.65 | 0.033 |
| 628. BD* ( 2) C 32 - C 33 | /412. RY* ( 2) C 38        | 0.34  | 0.60 | 0.025 |
| 628. BD* ( 2) C 32 - C 33 | /507. RY* ( 1) O 50        | 0.39  | 0.92 | 0.033 |
| 628. BD* ( 2) C 32 - C 33 | /641. BD* ( 2) C 38 - C 39 | 31.24 | 0.08 | 0.073 |
| 628. BD* ( 2) C 32 - C 33 | /646. BD* ( 2) C 40 - C 41 | 0.27  | 0.08 | 0.006 |
| 641. BD* ( 2) C 38 - C 39 | /412. RY* ( 2) C 38        | 1.56  | 0.52 | 0.073 |
| 641. BD* ( 2) C 38 - C 39 | /419. RY* ( 1) C 39        | 1.54  | 0.47 | 0.069 |
| 646. BD* ( 2) C 40 - C 41 | /427. RY* ( 1) C 40        | 0.96  | 0.81 | 0.064 |
| 646. BD* ( 2) C 40 - C 41 | /428. RY* ( 2) C 40        | 0.52  | 0.94 | 0.051 |
| 646. BD* ( 2) C 40 - C 41 | /435. RY* ( 1) C 41        | 2.02  | 0.48 | 0.071 |
| 653. BD* ( 2) C 44 - C 46 | /461. RY* ( 3) C 44        | 0.38  | 0.82 | 0.047 |
| 653. BD* ( 2) C 44 - C 46 | /462. RY* ( 4) C 44        | 0.53  | 0.69 | 0.051 |
| 653. BD* ( 2) C 44 - C 46 | /467. RY* ( 1) C 45        | 0.40  | 0.48 | 0.036 |
| 653. BD* ( 2) C 44 - C 46 | /476. RY* ( 2) C 46        | 0.60  | 0.62 | 0.051 |
| 653. BD* ( 2) C 44 - C 46 | /491. RY* ( 1) C 48        | 0.26  | 0.50 | 0.030 |

from unit 2 to unit 3

|                         |                      |      |        |       |
|-------------------------|----------------------|------|--------|-------|
| 54. BD ( 1) C 35 - C 37 | /168. LP ( 6)Cr 63   | 0.05 | 1.30   | 0.011 |
| 54. BD ( 1) C 35 - C 37 | /545. RY* ( 1)Cr 63  | 0.03 | 1.17   | 0.008 |
| 55. BD ( 2) C 35 - C 37 | /166. LP ( 4)Cr 63   | 0.11 | 0.14   | 0.006 |
| 55. BD ( 2) C 35 - C 37 | /171. LP* ( 9)Cr 63  | 0.04 | 2.09   | 0.013 |
| 58. BD ( 1) C 36 - C 37 | /171. LP* ( 9)Cr 63  | 0.03 | 2.58   | 0.012 |
| 58. BD ( 1) C 36 - C 37 | /545. RY* ( 1)Cr 63  | 0.03 | 1.28   | 0.008 |
| 60. BD ( 1) C 37 - N 42 | /166. LP ( 4)Cr 63   | 0.15 | 0.66   | 0.016 |
| 60. BD ( 1) C 37 - N 42 | /167. LP ( 5)Cr 63   | 0.05 | 0.67   | 0.008 |
| 60. BD ( 1) C 37 - N 42 | /168. LP ( 6)Cr 63   | 0.70 | 1.44   | 0.043 |
| 60. BD ( 1) C 37 - N 42 | /169. LP ( 7)Cr 63   | 0.13 | 2.41   | 0.023 |
| 60. BD ( 1) C 37 - N 42 | /171. LP* ( 9)Cr 63  | 0.04 | 2.61   | 0.013 |
| 60. BD ( 1) C 37 - N 42 | /545. RY* ( 1)Cr 63  | 0.05 | 1.31   | 0.010 |
| 60. BD ( 1) C 37 - N 42 | /546. RY* ( 2)Cr 63  | 0.06 | 2.37   | 0.016 |
| 60. BD ( 1) C 37 - N 42 | /547. RY* ( 3)Cr 63  | 0.06 | 2.50   | 0.015 |
| 60. BD ( 1) C 37 - N 42 | /548. RY* ( 4)Cr 63  | 0.06 | 2.34   | 0.015 |
| 60. BD ( 1) C 37 - N 42 | /552. RY* ( 8)Cr 63  | 0.03 | 9.49   | 0.021 |
| 60. BD ( 1) C 37 - N 42 | /556. RY* ( 12)Cr 63 | 0.03 | 8.84   | 0.020 |
| 60. BD ( 1) C 37 - N 42 | /557. RY* ( 13)Cr 63 | 0.03 | 5.22   | 0.015 |
| 70. BD ( 1) N 42 - N 43 | /166. LP ( 4)Cr 63   | 0.08 | 0.85   | 0.014 |
| 70. BD ( 1) N 42 - N 43 | /167. LP ( 5)Cr 63   | 0.04 | 0.87   | 0.009 |
| 70. BD ( 1) N 42 - N 43 | /168. LP ( 6)Cr 63   | 0.87 | 1.64   | 0.051 |
| 70. BD ( 1) N 42 - N 43 | /169. LP ( 7)Cr 63   | 0.06 | 2.61   | 0.015 |
| 70. BD ( 1) N 42 - N 43 | /170. LP* ( 8)Cr 63  | 0.05 | 2.81   | 0.015 |
| 70. BD ( 1) N 42 - N 43 | /545. RY* ( 1)Cr 63  | 0.03 | 1.51   | 0.008 |
| 70. BD ( 1) N 42 - N 43 | /546. RY* ( 2)Cr 63  | 0.22 | 2.57   | 0.030 |
| 70. BD ( 1) N 42 - N 43 | /548. RY* ( 4)Cr 63  | 0.03 | 2.54   | 0.012 |
| 70. BD ( 1) N 42 - N 43 | /549. RY* ( 5)Cr 63  | 0.05 | 2.38   | 0.014 |
| 70. BD ( 1) N 42 - N 43 | /550. RY* ( 6)Cr 63  | 0.17 | 3.80   | 0.032 |
| 70. BD ( 1) N 42 - N 43 | /552. RY* ( 8)Cr 63  | 0.03 | 9.69   | 0.021 |
| 70. BD ( 1) N 42 - N 43 | /554. RY* ( 10)Cr 63 | 0.05 | 10.08  | 0.028 |
| 70. BD ( 1) N 42 - N 43 | /555. RY* ( 11)Cr 63 | 0.04 | 5.35   | 0.018 |
| 70. BD ( 1) N 42 - N 43 | /561. RY* ( 17)Cr 63 | 0.07 | 38.54  | 0.065 |
| 70. BD ( 1) N 42 - N 43 | /564. RY* ( 20)Cr 63 | 0.03 | 675.27 | 0.180 |
| 71. BD ( 1) N 43 - C 44 | /168. LP ( 6)Cr 63   | 0.10 | 1.44   | 0.017 |
| 71. BD ( 1) N 43 - C 44 | /171. LP* ( 9)Cr 63  | 0.03 | 2.61   | 0.011 |
| 71. BD ( 1) N 43 - C 44 | /545. RY* ( 1)Cr 63  | 0.03 | 1.31   | 0.008 |
| 71. BD ( 1) N 43 - C 44 | /546. RY* ( 2)Cr 63  | 0.03 | 2.38   | 0.011 |

|                         |                      |       |        |       |
|-------------------------|----------------------|-------|--------|-------|
| 71. BD ( 1) N 43 - C 44 | /550. RY* ( 6)Cr 63  | 0.07  | 3.61   | 0.020 |
| 71. BD ( 1) N 43 - C 44 | /556. RY* ( 12)Cr 63 | 0.09  | 8.84   | 0.037 |
| 71. BD ( 1) N 43 - C 44 | /561. RY* ( 17)Cr 63 | 0.12  | 38.34  | 0.087 |
| 71. BD ( 1) N 43 - C 44 | /564. RY* ( 20)Cr 63 | 0.04  | 675.08 | 0.213 |
| 71. BD ( 1) N 43 - C 44 | /565. RY* ( 21)Cr 63 | 0.04  | 27.02  | 0.040 |
| 73. BD ( 1) C 44 - C 46 | /168. LP ( 6)Cr 63   | 0.14  | 1.42   | 0.019 |
| 73. BD ( 1) C 44 - C 46 | /545. RY* ( 1)Cr 63  | 0.03  | 1.29   | 0.008 |
| 73. BD ( 1) C 44 - C 46 | /546. RY* ( 2)Cr 63  | 0.07  | 2.35   | 0.016 |
| 73. BD ( 1) C 44 - C 46 | /561. RY* ( 17)Cr 63 | 0.03  | 38.32  | 0.044 |
| 74. BD ( 2) C 44 - C 46 | /166. LP ( 4)Cr 63   | 0.03  | 0.17   | 0.003 |
| 74. BD ( 2) C 44 - C 46 | /167. LP ( 5)Cr 63   | 0.04  | 0.18   | 0.004 |
| 74. BD ( 2) C 44 - C 46 | /168. LP ( 6)Cr 63   | 0.06  | 0.95   | 0.010 |
| 74. BD ( 2) C 44 - C 46 | /169. LP ( 7)Cr 63   | 0.03  | 1.92   | 0.010 |
| 77. BD ( 1) C 46 - C 48 | /168. LP ( 6)Cr 63   | 0.15  | 1.30   | 0.019 |
| 77. BD ( 1) C 46 - C 48 | /169. LP ( 7)Cr 63   | 0.08  | 2.27   | 0.017 |
| 77. BD ( 1) C 46 - C 48 | /545. RY* ( 1)Cr 63  | 0.03  | 1.17   | 0.008 |
| 77. BD ( 1) C 46 - C 48 | /561. RY* ( 17)Cr 63 | 0.03  | 38.20  | 0.040 |
| 78. BD ( 1) C 46 - O 62 | /166. LP ( 4)Cr 63   | 0.07  | 0.71   | 0.011 |
| 78. BD ( 1) C 46 - O 62 | /167. LP ( 5)Cr 63   | 0.18  | 0.73   | 0.017 |
| 78. BD ( 1) C 46 - O 62 | /168. LP ( 6)Cr 63   | 0.92  | 1.49   | 0.050 |
| 78. BD ( 1) C 46 - O 62 | /169. LP ( 7)Cr 63   | 0.13  | 2.47   | 0.023 |
| 78. BD ( 1) C 46 - O 62 | /171. LP* ( 9)Cr 63  | 0.03  | 2.66   | 0.011 |
| 78. BD ( 1) C 46 - O 62 | /546. RY* ( 2)Cr 63  | 0.14  | 2.43   | 0.024 |
| 78. BD ( 1) C 46 - O 62 | /549. RY* ( 5)Cr 63  | 0.05  | 2.24   | 0.013 |
| 78. BD ( 1) C 46 - O 62 | /550. RY* ( 6)Cr 63  | 0.08  | 3.66   | 0.022 |
| 78. BD ( 1) C 46 - O 62 | /552. RY* ( 8)Cr 63  | 0.05  | 9.55   | 0.028 |
| 78. BD ( 1) C 46 - O 62 | /554. RY* ( 10)Cr 63 | 0.04  | 9.94   | 0.026 |
| 119. CR ( 1) N 42       | /166. LP ( 4)Cr 63   | 0.17  | 14.08  | 0.079 |
| 119. CR ( 1) N 42       | /167. LP ( 5)Cr 63   | 0.05  | 14.10  | 0.042 |
| 119. CR ( 1) N 42       | /168. LP ( 6)Cr 63   | 1.08  | 14.86  | 0.172 |
| 120. CR ( 1) N 43       | /168. LP ( 6)Cr 63   | 0.03  | 14.91  | 0.029 |
| 123. CR ( 1) C 46       | /168. LP ( 6)Cr 63   | 0.05  | 10.76  | 0.032 |
| 128. CR ( 1) O 62       | /166. LP ( 4)Cr 63   | 0.11  | 18.79  | 0.076 |
| 128. CR ( 1) O 62       | /167. LP ( 5)Cr 63   | 0.22  | 18.80  | 0.099 |
| 128. CR ( 1) O 62       | /168. LP ( 6)Cr 63   | 1.45  | 19.57  | 0.229 |
| 155. LP ( 1) N 42       | /166. LP ( 4)Cr 63   | 0.37  | 0.17   | 0.013 |
| 155. LP ( 1) N 42       | /167. LP ( 5)Cr 63   | 0.12  | 0.19   | 0.007 |
| 155. LP ( 1) N 42       | /168. LP ( 6)Cr 63   | 0.38  | 0.95   | 0.025 |
| 155. LP ( 1) N 42       | /169. LP ( 7)Cr 63   | 0.05  | 1.93   | 0.013 |
| 155. LP ( 1) N 42       | /170. LP* ( 8)Cr 63  | 0.06  | 2.13   | 0.015 |
| 155. LP ( 1) N 42       | /550. RY* ( 6)Cr 63  | 0.07  | 3.12   | 0.018 |
| 155. LP ( 1) N 42       | /561. RY* ( 17)Cr 63 | 0.04  | 37.85  | 0.049 |
| 156. LP ( 2) N 42       | /166. LP ( 4)Cr 63   | 20.07 | 0.33   | 0.121 |
| 156. LP ( 2) N 42       | /167. LP ( 5)Cr 63   | 4.80  | 0.35   | 0.058 |
| 156. LP ( 2) N 42       | /168. LP ( 6)Cr 63   | 18.63 | 1.11   | 0.183 |
| 156. LP ( 2) N 42       | /169. LP ( 7)Cr 63   | 0.43  | 2.09   | 0.040 |
| 156. LP ( 2) N 42       | /170. LP* ( 8)Cr 63  | 0.57  | 2.29   | 0.049 |
| 156. LP ( 2) N 42       | /171. LP* ( 9)Cr 63  | 1.08  | 2.28   | 0.067 |
| 156. LP ( 2) N 42       | /545. RY* ( 1)Cr 63  | 0.33  | 0.98   | 0.024 |
| 156. LP ( 2) N 42       | /546. RY* ( 2)Cr 63  | 0.32  | 2.05   | 0.034 |
| 156. LP ( 2) N 42       | /547. RY* ( 3)Cr 63  | 0.09  | 2.18   | 0.019 |
| 156. LP ( 2) N 42       | /548. RY* ( 4)Cr 63  | 0.04  | 2.02   | 0.012 |
| 156. LP ( 2) N 42       | /549. RY* ( 5)Cr 63  | 0.16  | 1.86   | 0.024 |
| 156. LP ( 2) N 42       | /550. RY* ( 6)Cr 63  | 2.36  | 3.28   | 0.119 |
| 156. LP ( 2) N 42       | /551. RY* ( 7)Cr 63  | 0.05  | 2.37   | 0.015 |
| 156. LP ( 2) N 42       | /554. RY* ( 10)Cr 63 | 0.06  | 9.56   | 0.032 |
| 156. LP ( 2) N 42       | /556. RY* ( 12)Cr 63 | 0.20  | 8.51   | 0.056 |
| 156. LP ( 2) N 42       | /560. RY* ( 16)Cr 63 | 0.31  | 115.37 | 0.256 |
| 156. LP ( 2) N 42       | /561. RY* ( 17)Cr 63 | 1.81  | 38.01  | 0.354 |
| 156. LP ( 2) N 42       | /564. RY* ( 20)Cr 63 | 0.58  | 674.75 | 0.846 |
| 156. LP ( 2) N 42       | /565. RY* ( 21)Cr 63 | 0.07  | 26.69  | 0.058 |
| 157. LP ( 1) N 43       | /166. LP ( 4)Cr 63   | 0.05  | 0.31   | 0.007 |
| 157. LP ( 1) N 43       | /168. LP ( 6)Cr 63   | 0.15  | 1.09   | 0.017 |
| 157. LP ( 1) N 43       | /170. LP* ( 8)Cr 63  | 0.06  | 2.27   | 0.015 |
| 157. LP ( 1) N 43       | /171. LP* ( 9)Cr 63  | 0.03  | 2.26   | 0.011 |
| 159. LP ( 1) C 45       | /166. LP ( 4)Cr 63   | 0.03  | 0.03   | 0.002 |
| 163. LP ( 1) O 62       | /166. LP ( 4)Cr 63   | 0.86  | 0.47   | 0.032 |
| 163. LP ( 1) O 62       | /167. LP ( 5)Cr 63   | 1.57  | 0.49   | 0.042 |
| 163. LP ( 1) O 62       | /168. LP ( 6)Cr 63   | 6.38  | 1.25   | 0.121 |
| 163. LP ( 1) O 62       | /169. LP ( 7)Cr 63   | 0.69  | 2.23   | 0.050 |
| 163. LP ( 1) O 62       | /171. LP* ( 9)Cr 63  | 0.13  | 2.42   | 0.022 |



|                   |                      |       |        |       |
|-------------------|----------------------|-------|--------|-------|
| 163. LP ( 1) O 62 | /545. RY* ( 1)Cr 63  | 0.11  | 1.12   | 0.014 |
| 163. LP ( 1) O 62 | /546. RY* ( 2)Cr 63  | 0.38  | 2.19   | 0.036 |
| 163. LP ( 1) O 62 | /547. RY* ( 3)Cr 63  | 0.59  | 2.32   | 0.047 |
| 163. LP ( 1) O 62 | /548. RY* ( 4)Cr 63  | 0.07  | 2.16   | 0.015 |
| 163. LP ( 1) O 62 | /549. RY* ( 5)Cr 63  | 0.07  | 2.00   | 0.015 |
| 163. LP ( 1) O 62 | /550. RY* ( 6)Cr 63  | 0.32  | 3.42   | 0.042 |
| 163. LP ( 1) O 62 | /551. RY* ( 7)Cr 63  | 0.09  | 2.51   | 0.019 |
| 163. LP ( 1) O 62 | /552. RY* ( 8)Cr 63  | 0.08  | 9.31   | 0.035 |
| 163. LP ( 1) O 62 | /560. RY* ( 16)Cr 63 | 0.09  | 115.51 | 0.133 |
| 163. LP ( 1) O 62 | /561. RY* ( 17)Cr 63 | 0.61  | 38.15  | 0.195 |
| 163. LP ( 1) O 62 | /564. RY* ( 20)Cr 63 | 0.22  | 674.89 | 0.491 |
| 164. LP ( 2) O 62 | /166. LP ( 4)Cr 63   | 0.79  | 0.22   | 0.021 |
| 164. LP ( 2) O 62 | /167. LP ( 5)Cr 63   | 1.27  | 0.24   | 0.026 |
| 164. LP ( 2) O 62 | /168. LP ( 6)Cr 63   | 2.36  | 1.00   | 0.065 |
| 164. LP ( 2) O 62 | /169. LP ( 7)Cr 63   | 0.41  | 1.98   | 0.036 |
| 164. LP ( 2) O 62 | /170. LP* ( 8)Cr 63  | 0.14  | 2.18   | 0.023 |
| 164. LP ( 2) O 62 | /545. RY* ( 1)Cr 63  | 0.08  | 0.87   | 0.011 |
| 164. LP ( 2) O 62 | /547. RY* ( 3)Cr 63  | 0.22  | 2.07   | 0.028 |
| 164. LP ( 2) O 62 | /550. RY* ( 6)Cr 63  | 0.13  | 3.17   | 0.026 |
| 164. LP ( 2) O 62 | /551. RY* ( 7)Cr 63  | 0.03  | 2.26   | 0.011 |
| 164. LP ( 2) O 62 | /552. RY* ( 8)Cr 63  | 0.05  | 9.06   | 0.028 |
| 164. LP ( 2) O 62 | /560. RY* ( 16)Cr 63 | 0.03  | 115.26 | 0.077 |
| 164. LP ( 2) O 62 | /561. RY* ( 17)Cr 63 | 0.20  | 37.90  | 0.111 |
| 164. LP ( 2) O 62 | /564. RY* ( 20)Cr 63 | 0.07  | 674.64 | 0.275 |
| 165. LP ( 3) O 62 | /166. LP ( 4)Cr 63   | 12.93 | 0.28   | 0.089 |
| 165. LP ( 3) O 62 | /167. LP ( 5)Cr 63   | 16.19 | 0.30   | 0.097 |
| 165. LP ( 3) O 62 | /168. LP ( 6)Cr 63   | 14.87 | 1.06   | 0.159 |
| 165. LP ( 3) O 62 | /169. LP ( 7)Cr 63   | 3.26  | 2.04   | 0.111 |
| 165. LP ( 3) O 62 | /171. LP* ( 9)Cr 63  | 0.03  | 2.23   | 0.010 |
| 165. LP ( 3) O 62 | /545. RY* ( 1)Cr 63  | 0.50  | 0.93   | 0.030 |
| 165. LP ( 3) O 62 | /546. RY* ( 2)Cr 63  | 0.25  | 2.00   | 0.031 |
| 165. LP ( 3) O 62 | /547. RY* ( 3)Cr 63  | 0.89  | 2.13   | 0.059 |
| 165. LP ( 3) O 62 | /548. RY* ( 4)Cr 63  | 0.07  | 1.97   | 0.016 |
| 165. LP ( 3) O 62 | /549. RY* ( 5)Cr 63  | 0.18  | 1.81   | 0.025 |
| 165. LP ( 3) O 62 | /550. RY* ( 6)Cr 63  | 0.40  | 3.23   | 0.049 |
| 165. LP ( 3) O 62 | /551. RY* ( 7)Cr 63  | 0.06  | 2.33   | 0.016 |
| 165. LP ( 3) O 62 | /552. RY* ( 8)Cr 63  | 0.21  | 9.12   | 0.060 |
| 165. LP ( 3) O 62 | /559. RY* ( 15)Cr 63 | 0.07  | 26.12  | 0.060 |
| 165. LP ( 3) O 62 | /560. RY* ( 16)Cr 63 | 0.21  | 115.32 | 0.212 |
| 165. LP ( 3) O 62 | /561. RY* ( 17)Cr 63 | 1.24  | 37.96  | 0.296 |
| 165. LP ( 3) O 62 | /564. RY* ( 20)Cr 63 | 0.38  | 674.70 | 0.695 |

from unit 2 to unit 4

|                           |                            |      |      |       |
|---------------------------|----------------------------|------|------|-------|
| 54. BD ( 1) C 35 - C 37   | /568. RY* ( 1) H 65        | 0.03 | 1.39 | 0.009 |
| 55. BD ( 2) C 35 - C 37   | /665. BD* ( 1) H 65 - O 66 | 0.23 | 0.61 | 0.015 |
| 68. BD ( 1) C 40 - H 54   | /664. BD* ( 1) H 64 - O 66 | 0.03 | 0.84 | 0.006 |
| 71. BD ( 1) N 43 - C 44   | /570. RY* ( 1) O 66        | 0.03 | 2.93 | 0.012 |
| 156. LP ( 2) N 42         | /566. RY* ( 1) H 64        | 0.12 | 1.09 | 0.016 |
| 156. LP ( 2) N 42         | /568. RY* ( 1) H 65        | 0.13 | 1.21 | 0.017 |
| 156. LP ( 2) N 42         | /570. RY* ( 1) O 66        | 0.56 | 2.60 | 0.052 |
| 156. LP ( 2) N 42         | /572. RY* ( 3) O 66        | 0.07 | 1.78 | 0.015 |
| 156. LP ( 2) N 42         | /573. RY* ( 4) O 66        | 0.03 | 1.61 | 0.009 |
| 156. LP ( 2) N 42         | /664. BD* ( 1) H 64 - O 66 | 0.03 | 0.79 | 0.006 |
| 156. LP ( 2) N 42         | /665. BD* ( 1) H 65 - O 66 | 0.06 | 0.80 | 0.009 |
| 163. LP ( 1) O 62         | /566. RY* ( 1) H 64        | 0.03 | 1.23 | 0.008 |
| 163. LP ( 1) O 62         | /568. RY* ( 1) H 65        | 0.07 | 1.35 | 0.012 |
| 163. LP ( 1) O 62         | /570. RY* ( 1) O 66        | 0.19 | 2.74 | 0.029 |
| 164. LP ( 2) O 62         | /568. RY* ( 1) H 65        | 0.03 | 1.10 | 0.008 |
| 164. LP ( 2) O 62         | /570. RY* ( 1) O 66        | 0.08 | 2.49 | 0.018 |
| 164. LP ( 2) O 62         | /664. BD* ( 1) H 64 - O 66 | 0.08 | 0.69 | 0.010 |
| 164. LP ( 2) O 62         | /665. BD* ( 1) H 65 - O 66 | 0.03 | 0.69 | 0.006 |
| 165. LP ( 3) O 62         | /566. RY* ( 1) H 64        | 0.12 | 1.04 | 0.015 |
| 165. LP ( 3) O 62         | /568. RY* ( 1) H 65        | 0.06 | 1.16 | 0.012 |
| 165. LP ( 3) O 62         | /570. RY* ( 1) O 66        | 0.35 | 2.55 | 0.041 |
| 165. LP ( 3) O 62         | /573. RY* ( 4) O 66        | 0.04 | 1.56 | 0.011 |
| 165. LP ( 3) O 62         | /664. BD* ( 1) H 64 - O 66 | 0.05 | 0.75 | 0.009 |
| 646. BD* ( 2) C 40 - C 41 | /664. BD* ( 1) H 64 - O 66 | 0.06 | 0.30 | 0.009 |

from unit 2 to unit 5

|                         |                     |      |      |       |
|-------------------------|---------------------|------|------|-------|
| 58. BD ( 1) C 36 - C 37 | /580. RY* ( 3)C1 67 | 0.03 | 1.66 | 0.009 |
| 71. BD ( 1) N 43 - C 44 | /581. RY* ( 4)C1 67 | 0.03 | 2.43 | 0.011 |

|                       |                            |       |        |       |
|-----------------------|----------------------------|-------|--------|-------|
| 156. LP ( 2) N 42     | /579. RY* ( 2)C1 67        | 0.41  | 1.12   | 0.029 |
| 156. LP ( 2) N 42     | /580. RY* ( 3)C1 67        | 0.16  | 1.36   | 0.020 |
| 156. LP ( 2) N 42     | /581. RY* ( 4)C1 67        | 0.33  | 2.10   | 0.036 |
| 163. LP ( 1) O 62     | /579. RY* ( 2)C1 67        | 0.07  | 1.26   | 0.012 |
| 163. LP ( 1) O 62     | /580. RY* ( 3)C1 67        | 0.04  | 1.50   | 0.010 |
| 163. LP ( 1) O 62     | /581. RY* ( 4)C1 67        | 0.18  | 2.24   | 0.026 |
| 164. LP ( 2) O 62     | /579. RY* ( 2)C1 67        | 0.03  | 1.01   | 0.007 |
| 164. LP ( 2) O 62     | /581. RY* ( 4)C1 67        | 0.06  | 1.99   | 0.014 |
| 165. LP ( 3) O 62     | /579. RY* ( 2)C1 67        | 0.13  | 1.08   | 0.016 |
| 165. LP ( 3) O 62     | /580. RY* ( 3)C1 67        | 0.06  | 1.32   | 0.012 |
| 165. LP ( 3) O 62     | /581. RY* ( 4)C1 67        | 0.36  | 2.05   | 0.037 |
| from unit 3 to unit 1 |                            |       |        |       |
| 129. CR ( 1)Cr 63     | /602. BD* ( 1) C 6 - N 11  | 0.03  | 215.68 | 0.094 |
| 129. CR ( 1)Cr 63     | /620. BD* ( 1) C 15 - O 19 | 0.03  | 215.63 | 0.097 |
| 130. CR ( 2)Cr 63     | /602. BD* ( 1) C 6 - N 11  | 0.15  | 24.51  | 0.077 |
| 130. CR ( 2)Cr 63     | /612. BD* ( 1) N 11 - N 12 | 0.10  | 24.62  | 0.063 |
| 130. CR ( 2)Cr 63     | /620. BD* ( 1) C 15 - O 19 | 0.16  | 24.46  | 0.080 |
| 131. CR ( 3)Cr 63     | /262. RY* ( 2) N 11        | 0.03  | 5.76   | 0.015 |
| 131. CR ( 3)Cr 63     | /263. RY* ( 3) N 11        | 0.12  | 5.17   | 0.032 |
| 131. CR ( 3)Cr 63     | /293. RY* ( 1) C 15        | 0.03  | 5.00   | 0.014 |
| 131. CR ( 3)Cr 63     | /326. RY* ( 2) O 19        | 0.03  | 5.49   | 0.015 |
| 131. CR ( 3)Cr 63     | /602. BD* ( 1) C 6 - N 11  | 0.73  | 4.19   | 0.070 |
| 131. CR ( 3)Cr 63     | /612. BD* ( 1) N 11 - N 12 | 0.48  | 4.30   | 0.058 |
| 131. CR ( 3)Cr 63     | /619. BD* ( 1) C 15 - C 17 | 0.03  | 4.27   | 0.015 |
| 131. CR ( 3)Cr 63     | /620. BD* ( 1) C 15 - O 19 | 0.90  | 4.14   | 0.078 |
| 133. CR ( 5)Cr 63     | /262. RY* ( 2) N 11        | 0.03  | 3.86   | 0.014 |
| 133. CR ( 5)Cr 63     | /263. RY* ( 3) N 11        | 0.08  | 3.27   | 0.021 |
| 133. CR ( 5)Cr 63     | /602. BD* ( 1) C 6 - N 11  | 0.28  | 2.30   | 0.032 |
| 133. CR ( 5)Cr 63     | /612. BD* ( 1) N 11 - N 12 | 0.24  | 2.41   | 0.031 |
| 135. CR ( 7)Cr 63     | /612. BD* ( 1) N 11 - N 12 | 0.04  | 2.41   | 0.012 |
| 135. CR ( 7)Cr 63     | /620. BD* ( 1) C 15 - O 19 | 0.50  | 2.25   | 0.043 |
| 137. CR ( 9)Cr 63     | /602. BD* ( 1) C 6 - N 11  | 0.04  | 2.30   | 0.013 |
| 166. LP ( 4)Cr 63     | / 13. BD* ( 2) C 4 - C 6   | 0.19  | 0.10   | 0.006 |
| 166. LP ( 4)Cr 63     | /262. RY* ( 2) N 11        | 0.20  | 2.08   | 0.041 |
| 166. LP ( 4)Cr 63     | /264. RY* ( 4) N 11        | 0.04  | 1.64   | 0.016 |
| 166. LP ( 4)Cr 63     | /602. BD* ( 1) C 6 - N 11  | 0.04  | 0.51   | 0.009 |
| 166. LP ( 4)Cr 63     | /612. BD* ( 1) N 11 - N 12 | 0.03  | 0.62   | 0.009 |
| 166. LP ( 4)Cr 63     | /613. BD* ( 1) N 12 - C 13 | 0.04  | 0.50   | 0.009 |
| 167. LP ( 5)Cr 63     | / 13. BD* ( 2) C 4 - C 6   | 0.07  | 0.08   | 0.003 |
| 167. LP ( 5)Cr 63     | /222. RY* ( 2) C 6         | 0.03  | 1.33   | 0.013 |
| 167. LP ( 5)Cr 63     | /262. RY* ( 2) N 11        | 0.07  | 2.06   | 0.027 |
| 167. LP ( 5)Cr 63     | /263. RY* ( 3) N 11        | 0.05  | 1.47   | 0.019 |
| 167. LP ( 5)Cr 63     | /293. RY* ( 1) C 15        | 0.05  | 1.31   | 0.018 |
| 167. LP ( 5)Cr 63     | /326. RY* ( 2) O 19        | 0.29  | 1.79   | 0.050 |
| 167. LP ( 5)Cr 63     | /327. RY* ( 3) O 19        | 0.34  | 1.99   | 0.058 |
| 167. LP ( 5)Cr 63     | /620. BD* ( 1) C 15 - O 19 | 0.07  | 0.44   | 0.012 |
| 168. LP ( 6)Cr 63     | /192. RY* ( 4) C 2         | 0.07  | 0.43   | 0.018 |
| 168. LP ( 6)Cr 63     | /206. RY* ( 2) C 4         | 0.05  | 0.96   | 0.023 |
| 168. LP ( 6)Cr 63     | /207. RY* ( 3) C 4         | 0.11  | 0.96   | 0.035 |
| 168. LP ( 6)Cr 63     | /208. RY* ( 4) C 4         | 0.05  | 0.33   | 0.013 |
| 168. LP ( 6)Cr 63     | /214. RY* ( 2) C 5         | 0.08  | 0.76   | 0.026 |
| 168. LP ( 6)Cr 63     | /215. RY* ( 3) C 5         | 0.10  | 0.60   | 0.026 |
| 168. LP ( 6)Cr 63     | /216. RY* ( 4) C 5         | 0.04  | 0.51   | 0.016 |
| 168. LP ( 6)Cr 63     | /218. RY* ( 6) C 5         | 0.03  | 3.35   | 0.034 |
| 168. LP ( 6)Cr 63     | /221. RY* ( 1) C 6         | 1.36  | 0.22   | 0.057 |
| 168. LP ( 6)Cr 63     | /222. RY* ( 2) C 6         | 4.66  | 0.56   | 0.171 |
| 168. LP ( 6)Cr 63     | /223. RY* ( 3) C 6         | 0.72  | 0.47   | 0.062 |
| 168. LP ( 6)Cr 63     | /224. RY* ( 4) C 6         | 3.31  | 0.40   | 0.122 |
| 168. LP ( 6)Cr 63     | /225. RY* ( 5) C 6         | 0.04  | 2.40   | 0.034 |
| 168. LP ( 6)Cr 63     | /226. RY* ( 6) C 6         | 0.54  | 2.36   | 0.121 |
| 168. LP ( 6)Cr 63     | /228. RY* ( 8) C 6         | 0.05  | 2.17   | 0.035 |
| 168. LP ( 6)Cr 63     | /245. RY* ( 1) C 9         | 0.07  | 0.60   | 0.021 |
| 168. LP ( 6)Cr 63     | /247. RY* ( 3) C 9         | 0.13  | 0.49   | 0.027 |
| 168. LP ( 6)Cr 63     | /248. RY* ( 4) C 9         | 0.03  | 0.47   | 0.013 |
| 168. LP ( 6)Cr 63     | /261. RY* ( 1) N 11        | 0.19  | 0.23   | 0.022 |
| 168. LP ( 6)Cr 63     | /262. RY* ( 2) N 11        | 16.50 | 1.30   | 0.488 |
| 168. LP ( 6)Cr 63     | /263. RY* ( 3) N 11        | 10.17 | 0.70   | 0.284 |
| 168. LP ( 6)Cr 63     | /264. RY* ( 4) N 11        | 0.10  | 0.86   | 0.030 |
| 168. LP ( 6)Cr 63     | /266. RY* ( 6) N 11        | 0.04  | 3.35   | 0.038 |
| 168. LP ( 6)Cr 63     | /269. RY* ( 1) N 12        | 0.60  | 0.16   | 0.032 |

|                   |                            |      |      |       |
|-------------------|----------------------------|------|------|-------|
| 168. LP ( 6)Cr 63 | /270. RY* ( 2) N 12        | 1.33 | 0.18 | 0.051 |
| 168. LP ( 6)Cr 63 | /271. RY* ( 3) N 12        | 1.58 | 0.48 | 0.093 |
| 168. LP ( 6)Cr 63 | /272. RY* ( 4) N 12        | 0.64 | 1.03 | 0.086 |
| 168. LP ( 6)Cr 63 | /275. RY* ( 7) N 12        | 0.08 | 3.06 | 0.052 |
| 168. LP ( 6)Cr 63 | /278. RY* ( 2) C 13        | 0.12 | 0.79 | 0.032 |
| 168. LP ( 6)Cr 63 | /279. RY* ( 3) C 13        | 1.38 | 0.28 | 0.067 |
| 168. LP ( 6)Cr 63 | /282. RY* ( 6) C 13        | 0.05 | 2.52 | 0.039 |
| 168. LP ( 6)Cr 63 | /287. RY* ( 3) C 14        | 0.03 | 0.65 | 0.016 |
| 168. LP ( 6)Cr 63 | /288. RY* ( 4) C 14        | 0.16 | 0.28 | 0.022 |
| 168. LP ( 6)Cr 63 | /293. RY* ( 1) C 15        | 8.19 | 0.54 | 0.221 |
| 168. LP ( 6)Cr 63 | /295. RY* ( 3) C 15        | 1.42 | 0.88 | 0.118 |
| 168. LP ( 6)Cr 63 | /296. RY* ( 4) C 15        | 0.49 | 0.37 | 0.045 |
| 168. LP ( 6)Cr 63 | /297. RY* ( 5) C 15        | 0.82 | 3.17 | 0.172 |
| 168. LP ( 6)Cr 63 | /299. RY* ( 7) C 15        | 0.08 | 2.53 | 0.047 |
| 168. LP ( 6)Cr 63 | /302. RY* ( 2) C 16        | 0.06 | 0.59 | 0.019 |
| 168. LP ( 6)Cr 63 | /310. RY* ( 2) C 17        | 0.37 | 0.69 | 0.054 |
| 168. LP ( 6)Cr 63 | /312. RY* ( 4) C 17        | 0.08 | 0.26 | 0.015 |
| 168. LP ( 6)Cr 63 | /317. RY* ( 1) C 18        | 0.03 | 0.56 | 0.014 |
| 168. LP ( 6)Cr 63 | /326. RY* ( 2) O 19        | 6.21 | 1.02 | 0.268 |
| 168. LP ( 6)Cr 63 | /327. RY* ( 3) O 19        | 7.62 | 1.22 | 0.325 |
| 168. LP ( 6)Cr 63 | /329. RY* ( 5) O 19        | 0.06 | 4.53 | 0.054 |
| 168. LP ( 6)Cr 63 | /608. BD* ( 1) C 9 - C 10  | 0.16 | 0.02 | 0.006 |
| 168. LP ( 6)Cr 63 | /623. BD* ( 1) C 17 - C 18 | 0.13 | 0.01 | 0.004 |
| 169. LP ( 7)Cr 63 | /262. RY* ( 2) N 11        | 0.07 | 0.32 | 0.052 |
| 169. LP ( 7)Cr 63 | /272. RY* ( 4) N 12        | 0.18 | 0.05 | 0.039 |
| 169. LP ( 7)Cr 63 | /298. RY* ( 6) C 15        | 0.03 | 1.99 | 0.097 |
| 169. LP ( 7)Cr 63 | /326. RY* ( 2) O 19        | 1.70 | 0.05 | 0.112 |
| 169. LP ( 7)Cr 63 | /327. RY* ( 3) O 19        | 2.04 | 0.25 | 0.279 |
| 169. LP ( 7)Cr 63 | /328. RY* ( 4) O 19        | 0.07 | 0.25 | 0.054 |
| 172. LP ( 1)Cr 63 | /325. RY* ( 1) O 19        | 0.04 | 1.37 | 0.009 |
| 172. LP ( 1)Cr 63 | /602. BD* ( 1) C 6 - N 11  | 0.04 | 0.65 | 0.007 |
| 172. LP ( 1)Cr 63 | /620. BD* ( 1) C 15 - O 19 | 0.09 | 0.59 | 0.009 |
| 173. LP ( 2)Cr 63 | /261. RY* ( 1) N 11        | 0.19 | 1.15 | 0.019 |
| 173. LP ( 2)Cr 63 | /620. BD* ( 1) C 15 - O 19 | 0.14 | 0.59 | 0.012 |
| 174. LP ( 3)Cr 63 | / 13. BD* ( 2) C 4 - C 6   | 0.07 | 0.23 | 0.007 |
| 174. LP ( 3)Cr 63 | /262. RY* ( 2) N 11        | 0.04 | 2.21 | 0.012 |
| 174. LP ( 3)Cr 63 | /264. RY* ( 4) N 11        | 0.12 | 1.77 | 0.018 |
| 174. LP ( 3)Cr 63 | /265. RY* ( 5) N 11        | 0.03 | 4.18 | 0.015 |
| 174. LP ( 3)Cr 63 | /277. RY* ( 1) C 13        | 0.03 | 1.40 | 0.009 |
| 174. LP ( 3)Cr 63 | /602. BD* ( 1) C 6 - N 11  | 0.30 | 0.64 | 0.018 |
| 174. LP ( 3)Cr 63 | /612. BD* ( 1) N 11 - N 12 | 0.54 | 0.76 | 0.026 |
| 174. LP ( 3)Cr 63 | /620. BD* ( 1) C 15 - O 19 | 0.04 | 0.59 | 0.006 |

from unit 3 to unit 2

|                   |                            |      |        |       |
|-------------------|----------------------------|------|--------|-------|
| 129. CR ( 1)Cr 63 | /639. BD* ( 1) C 37 - N 42 | 0.03 | 215.67 | 0.094 |
| 129. CR ( 1)Cr 63 | /657. BD* ( 1) C 46 - O 62 | 0.03 | 215.62 | 0.099 |
| 130. CR ( 2)Cr 63 | /639. BD* ( 1) C 37 - N 42 | 0.15 | 24.50  | 0.077 |
| 130. CR ( 2)Cr 63 | /649. BD* ( 1) N 42 - N 43 | 0.08 | 24.61  | 0.057 |
| 130. CR ( 2)Cr 63 | /657. BD* ( 1) C 46 - O 62 | 0.17 | 24.45  | 0.081 |
| 131. CR ( 3)Cr 63 | /445. RY* ( 3) N 42        | 0.09 | 5.14   | 0.027 |
| 131. CR ( 3)Cr 63 | /475. RY* ( 1) C 46        | 0.03 | 5.01   | 0.016 |
| 131. CR ( 3)Cr 63 | /538. RY* ( 2) O 62        | 0.04 | 5.68   | 0.018 |
| 131. CR ( 3)Cr 63 | /639. BD* ( 1) C 37 - N 42 | 0.73 | 4.18   | 0.071 |
| 131. CR ( 3)Cr 63 | /649. BD* ( 1) N 42 - N 43 | 0.41 | 4.29   | 0.053 |
| 131. CR ( 3)Cr 63 | /650. BD* ( 1) N 43 - C 44 | 0.03 | 4.17   | 0.013 |
| 131. CR ( 3)Cr 63 | /656. BD* ( 1) C 46 - C 48 | 0.04 | 4.26   | 0.016 |
| 131. CR ( 3)Cr 63 | /657. BD* ( 1) C 46 - O 62 | 0.92 | 4.13   | 0.078 |
| 133. CR ( 5)Cr 63 | /444. RY* ( 2) N 42        | 0.03 | 3.93   | 0.013 |
| 133. CR ( 5)Cr 63 | /445. RY* ( 3) N 42        | 0.06 | 3.25   | 0.018 |
| 133. CR ( 5)Cr 63 | /639. BD* ( 1) C 37 - N 42 | 0.30 | 2.29   | 0.033 |
| 133. CR ( 5)Cr 63 | /649. BD* ( 1) N 42 - N 43 | 0.21 | 2.40   | 0.029 |
| 133. CR ( 5)Cr 63 | /657. BD* ( 1) C 46 - O 62 | 0.04 | 2.24   | 0.012 |
| 135. CR ( 7)Cr 63 | /649. BD* ( 1) N 42 - N 43 | 0.03 | 2.40   | 0.011 |
| 137. CR ( 9)Cr 63 | /639. BD* ( 1) C 37 - N 42 | 0.05 | 2.29   | 0.013 |
| 137. CR ( 9)Cr 63 | /657. BD* ( 1) C 46 - O 62 | 0.47 | 2.24   | 0.041 |
| 166. LP ( 4)Cr 63 | / 56. BD* ( 2) C 35 - C 37 | 0.20 | 0.09   | 0.006 |
| 166. LP ( 4)Cr 63 | /444. RY* ( 2) N 42        | 0.24 | 2.15   | 0.044 |
| 166. LP ( 4)Cr 63 | /445. RY* ( 3) N 42        | 0.06 | 1.46   | 0.019 |
| 166. LP ( 4)Cr 63 | /446. RY* ( 4) N 42        | 0.04 | 1.60   | 0.016 |
| 166. LP ( 4)Cr 63 | /538. RY* ( 2) O 62        | 0.22 | 2.00   | 0.042 |
| 166. LP ( 4)Cr 63 | /539. RY* ( 3) O 62        | 0.12 | 1.76   | 0.029 |

|                   |                            |       |      |       |
|-------------------|----------------------------|-------|------|-------|
| 166. LP ( 4)Cr 63 | /639. BD* ( 1) C 37 - N 42 | 0.05  | 0.50 | 0.010 |
| 166. LP ( 4)Cr 63 | /650. BD* ( 1) N 43 - C 44 | 0.05  | 0.49 | 0.009 |
| 166. LP ( 4)Cr 63 | /657. BD* ( 1) C 46 - O 62 | 0.05  | 0.45 | 0.009 |
| 167. LP ( 5)Cr 63 | /404. RY* ( 2) C 37        | 0.03  | 1.22 | 0.014 |
| 167. LP ( 5)Cr 63 | /444. RY* ( 2) N 42        | 0.04  | 2.13 | 0.020 |
| 167. LP ( 5)Cr 63 | /445. RY* ( 3) N 42        | 0.07  | 1.45 | 0.022 |
| 167. LP ( 5)Cr 63 | /475. RY* ( 1) C 46        | 0.03  | 1.31 | 0.014 |
| 167. LP ( 5)Cr 63 | /657. BD* ( 1) C 46 - O 62 | 0.05  | 0.44 | 0.010 |
| 168. LP ( 6)Cr 63 | /374. RY* ( 4) C 33        | 0.05  | 0.38 | 0.015 |
| 168. LP ( 6)Cr 63 | /388. RY* ( 2) C 35        | 0.07  | 0.92 | 0.027 |
| 168. LP ( 6)Cr 63 | /389. RY* ( 3) C 35        | 0.15  | 0.90 | 0.038 |
| 168. LP ( 6)Cr 63 | /390. RY* ( 4) C 35        | 0.06  | 0.30 | 0.014 |
| 168. LP ( 6)Cr 63 | /392. RY* ( 6) C 35        | 0.03  | 2.54 | 0.028 |
| 168. LP ( 6)Cr 63 | /396. RY* ( 2) C 36        | 0.03  | 0.62 | 0.015 |
| 168. LP ( 6)Cr 63 | /397. RY* ( 3) C 36        | 0.11  | 0.52 | 0.026 |
| 168. LP ( 6)Cr 63 | /398. RY* ( 4) C 36        | 0.07  | 0.53 | 0.020 |
| 168. LP ( 6)Cr 63 | /403. RY* ( 1) C 37        | 1.95  | 0.20 | 0.065 |
| 168. LP ( 6)Cr 63 | /404. RY* ( 2) C 37        | 7.55  | 0.45 | 0.195 |
| 168. LP ( 6)Cr 63 | /405. RY* ( 3) C 37        | 0.77  | 0.42 | 0.061 |
| 168. LP ( 6)Cr 63 | /406. RY* ( 4) C 37        | 0.66  | 0.41 | 0.055 |
| 168. LP ( 6)Cr 63 | /408. RY* ( 6) C 37        | 0.56  | 2.92 | 0.137 |
| 168. LP ( 6)Cr 63 | /410. RY* ( 8) C 37        | 0.13  | 2.14 | 0.056 |
| 168. LP ( 6)Cr 63 | /428. RY* ( 2) C 40        | 0.04  | 0.32 | 0.011 |
| 168. LP ( 6)Cr 63 | /429. RY* ( 3) C 40        | 0.19  | 0.48 | 0.032 |
| 168. LP ( 6)Cr 63 | /430. RY* ( 4) C 40        | 0.04  | 0.43 | 0.014 |
| 168. LP ( 6)Cr 63 | /443. RY* ( 1) N 42        | 0.23  | 0.22 | 0.024 |
| 168. LP ( 6)Cr 63 | /444. RY* ( 2) N 42        | 15.38 | 1.36 | 0.483 |
| 168. LP ( 6)Cr 63 | /445. RY* ( 3) N 42        | 13.54 | 0.68 | 0.323 |
| 168. LP ( 6)Cr 63 | /446. RY* ( 4) N 42        | 0.08  | 0.81 | 0.027 |
| 168. LP ( 6)Cr 63 | /447. RY* ( 5) N 42        | 0.05  | 3.24 | 0.042 |
| 168. LP ( 6)Cr 63 | /448. RY* ( 6) N 42        | 0.05  | 3.37 | 0.043 |
| 168. LP ( 6)Cr 63 | /451. RY* ( 1) N 43        | 1.70  | 0.18 | 0.059 |
| 168. LP ( 6)Cr 63 | /452. RY* ( 2) N 43        | 1.39  | 0.18 | 0.052 |
| 168. LP ( 6)Cr 63 | /453. RY* ( 3) N 43        | 2.84  | 0.44 | 0.119 |
| 168. LP ( 6)Cr 63 | /454. RY* ( 4) N 43        | 0.24  | 1.03 | 0.053 |
| 168. LP ( 6)Cr 63 | /455. RY* ( 5) N 43        | 0.05  | 3.54 | 0.043 |
| 168. LP ( 6)Cr 63 | /457. RY* ( 7) N 43        | 0.05  | 3.11 | 0.042 |
| 168. LP ( 6)Cr 63 | /460. RY* ( 2) C 44        | 0.06  | 0.77 | 0.023 |
| 168. LP ( 6)Cr 63 | /461. RY* ( 3) C 44        | 1.45  | 0.19 | 0.055 |
| 168. LP ( 6)Cr 63 | /462. RY* ( 4) C 44        | 0.91  | 0.06 | 0.024 |
| 168. LP ( 6)Cr 63 | /463. RY* ( 5) C 44        | 0.03  | 2.10 | 0.029 |
| 168. LP ( 6)Cr 63 | /464. RY* ( 6) C 44        | 0.06  | 2.60 | 0.041 |
| 168. LP ( 6)Cr 63 | /469. RY* ( 3) C 45        | 0.04  | 0.66 | 0.016 |
| 168. LP ( 6)Cr 63 | /470. RY* ( 4) C 45        | 0.25  | 0.28 | 0.029 |
| 168. LP ( 6)Cr 63 | /475. RY* ( 1) C 46        | 7.19  | 0.54 | 0.208 |
| 168. LP ( 6)Cr 63 | /477. RY* ( 3) C 46        | 1.18  | 0.89 | 0.109 |
| 168. LP ( 6)Cr 63 | /478. RY* ( 4) C 46        | 0.35  | 0.39 | 0.040 |
| 168. LP ( 6)Cr 63 | /479. RY* ( 5) C 46        | 0.18  | 3.99 | 0.089 |
| 168. LP ( 6)Cr 63 | /480. RY* ( 6) C 46        | 0.43  | 2.04 | 0.100 |
| 168. LP ( 6)Cr 63 | /484. RY* ( 2) C 47        | 0.05  | 0.59 | 0.019 |
| 168. LP ( 6)Cr 63 | /486. RY* ( 4) C 47        | 0.03  | 0.42 | 0.012 |
| 168. LP ( 6)Cr 63 | /492. RY* ( 2) C 48        | 0.29  | 0.68 | 0.047 |
| 168. LP ( 6)Cr 63 | /494. RY* ( 4) C 48        | 0.04  | 0.25 | 0.011 |
| 168. LP ( 6)Cr 63 | /499. RY* ( 1) C 49        | 0.03  | 0.56 | 0.013 |
| 168. LP ( 6)Cr 63 | /522. RY* ( 2) H 54        | 0.13  | 1.70 | 0.050 |
| 168. LP ( 6)Cr 63 | /537. RY* ( 1) O 62        | 0.04  | 0.41 | 0.013 |
| 168. LP ( 6)Cr 63 | /538. RY* ( 2) O 62        | 5.66  | 1.22 | 0.280 |
| 168. LP ( 6)Cr 63 | /539. RY* ( 3) O 62        | 6.23  | 0.98 | 0.263 |
| 168. LP ( 6)Cr 63 | /541. RY* ( 5) O 62        | 0.20  | 4.38 | 0.100 |
| 168. LP ( 6)Cr 63 | /542. RY* ( 6) O 62        | 0.03  | 4.26 | 0.038 |
| 168. LP ( 6)Cr 63 | /544. RY* ( 8) O 62        | 0.06  | 4.23 | 0.052 |
| 168. LP ( 6)Cr 63 | /645. BD* ( 1) C 40 - C 41 | 0.11  | 0.01 | 0.004 |
| 169. LP ( 7)Cr 63 | /444. RY* ( 2) N 42        | 3.56  | 0.39 | 0.410 |
| 169. LP ( 7)Cr 63 | /454. RY* ( 4) N 43        | 0.85  | 0.06 | 0.087 |
| 169. LP ( 7)Cr 63 | /479. RY* ( 5) C 46        | 0.05  | 3.02 | 0.151 |
| 169. LP ( 7)Cr 63 | /480. RY* ( 6) C 46        | 0.04  | 1.07 | 0.081 |
| 169. LP ( 7)Cr 63 | /538. RY* ( 2) O 62        | 15.31 | 0.25 | 0.750 |
| 169. LP ( 7)Cr 63 | /540. RY* ( 4) O 62        | 0.16  | 0.24 | 0.077 |
| 172. LP ( 1)Cr 63 | /537. RY* ( 1) O 62        | 0.04  | 1.33 | 0.009 |
| 172. LP ( 1)Cr 63 | /649. BD* ( 1) N 42 - N 43 | 0.06  | 0.75 | 0.008 |
| 172. LP ( 1)Cr 63 | /657. BD* ( 1) C 46 - O 62 | 0.07  | 0.59 | 0.008 |

|                   |                            |      |      |       |
|-------------------|----------------------------|------|------|-------|
| 173. LP ( 2)Cr 63 | / 56. BD* ( 2) C 35 - C 37 | 0.03 | 0.22 | 0.005 |
| 173. LP ( 2)Cr 63 | /408. RY* ( 6) C 37        | 0.03 | 3.84 | 0.014 |
| 173. LP ( 2)Cr 63 | /446. RY* ( 4) N 42        | 0.09 | 1.73 | 0.016 |
| 173. LP ( 2)Cr 63 | /447. RY* ( 5) N 42        | 0.03 | 4.15 | 0.013 |
| 173. LP ( 2)Cr 63 | /459. RY* ( 1) C 44        | 0.03 | 1.43 | 0.008 |
| 173. LP ( 2)Cr 63 | /539. RY* ( 3) O 62        | 0.04 | 1.89 | 0.010 |
| 173. LP ( 2)Cr 63 | /639. BD* ( 1) C 37 - N 42 | 0.31 | 0.63 | 0.018 |
| 173. LP ( 2)Cr 63 | /649. BD* ( 1) N 42 - N 43 | 0.53 | 0.75 | 0.025 |
| 173. LP ( 2)Cr 63 | /656. BD* ( 1) C 46 - C 48 | 0.04 | 0.71 | 0.006 |
| 173. LP ( 2)Cr 63 | /657. BD* ( 1) C 46 - O 62 | 0.10 | 0.59 | 0.010 |
| 174. LP ( 3)Cr 63 | /443. RY* ( 1) N 42        | 0.13 | 1.14 | 0.016 |
| 174. LP ( 3)Cr 63 | /657. BD* ( 1) C 46 - O 62 | 0.11 | 0.59 | 0.010 |

within unit 3

|                   |                      |       |        |       |
|-------------------|----------------------|-------|--------|-------|
| 130. CR ( 2)Cr 63 | /168. LP ( 6)Cr 63   | 0.80  | 24.78  | 0.191 |
| 131. CR ( 3)Cr 63 | /168. LP ( 6)Cr 63   | 2.90  | 4.46   | 0.155 |
| 166. LP ( 4)Cr 63 | /167. LP ( 5)Cr 63   | 0.52  | 0.02   | 0.004 |
| 166. LP ( 4)Cr 63 | /551. RY* ( 7)Cr 63  | 0.28  | 2.04   | 0.047 |
| 167. LP ( 5)Cr 63 | /168. LP ( 6)Cr 63   | 1.40  | 0.77   | 0.061 |
| 167. LP ( 5)Cr 63 | /547. RY* ( 3)Cr 63  | 0.64  | 1.83   | 0.075 |
| 167. LP ( 5)Cr 63 | /550. RY* ( 6)Cr 63  | 0.28  | 2.93   | 0.063 |
| 167. LP ( 5)Cr 63 | /561. RY* ( 17)Cr 63 | 0.32  | 37.67  | 0.243 |
| 168. LP ( 6)Cr 63 | /169. LP ( 7)Cr 63   | 3.40  | 0.97   | 0.188 |
| 168. LP ( 6)Cr 63 | /546. RY* ( 2)Cr 63  | 9.96  | 0.94   | 0.325 |
| 168. LP ( 6)Cr 63 | /547. RY* ( 3)Cr 63  | 3.93  | 1.06   | 0.217 |
| 168. LP ( 6)Cr 63 | /548. RY* ( 4)Cr 63  | 1.15  | 0.91   | 0.108 |
| 168. LP ( 6)Cr 63 | /549. RY* ( 5)Cr 63  | 5.71  | 0.75   | 0.220 |
| 168. LP ( 6)Cr 63 | /550. RY* ( 6)Cr 63  | 27.44 | 2.16   | 0.821 |
| 168. LP ( 6)Cr 63 | /551. RY* ( 7)Cr 63  | 1.43  | 1.26   | 0.143 |
| 168. LP ( 6)Cr 63 | /554. RY* ( 10)Cr 63 | 0.98  | 8.44   | 0.307 |
| 168. LP ( 6)Cr 63 | /555. RY* ( 11)Cr 63 | 0.42  | 3.71   | 0.134 |
| 168. LP ( 6)Cr 63 | /558. RY* ( 14)Cr 63 | 0.33  | 3.93   | 0.122 |
| 168. LP ( 6)Cr 63 | /560. RY* ( 16)Cr 63 | 3.83  | 114.25 | 2.234 |
| 168. LP ( 6)Cr 63 | /561. RY* ( 17)Cr 63 | 23.31 | 36.90  | 3.131 |
| 168. LP ( 6)Cr 63 | /564. RY* ( 20)Cr 63 | 7.38  | 673.64 | 7.526 |
| 169. LP ( 7)Cr 63 | /547. RY* ( 3)Cr 63  | 4.07  | 0.09   | 0.230 |
| 169. LP ( 7)Cr 63 | /551. RY* ( 7)Cr 63  | 0.36  | 0.29   | 0.127 |
| 169. LP ( 7)Cr 63 | /552. RY* ( 8)Cr 63  | 2.98  | 7.08   | 1.853 |
| 169. LP ( 7)Cr 63 | /559. RY* ( 15)Cr 63 | 0.81  | 24.08  | 1.782 |
| 169. LP ( 7)Cr 63 | /561. RY* ( 17)Cr 63 | 0.32  | 35.93  | 1.366 |

from unit 3 to unit 4

|                   |                            |       |      |       |
|-------------------|----------------------------|-------|------|-------|
| 133. CR ( 5)Cr 63 | /665. BD* ( 1) H 65 - O 66 | 0.03  | 2.25 | 0.010 |
| 135. CR ( 7)Cr 63 | /664. BD* ( 1) H 64 - O 66 | 0.03  | 2.25 | 0.010 |
| 137. CR ( 9)Cr 63 | /664. BD* ( 1) H 64 - O 66 | 0.03  | 2.25 | 0.011 |
| 137. CR ( 9)Cr 63 | /665. BD* ( 1) H 65 - O 66 | 0.03  | 2.26 | 0.011 |
| 167. LP ( 5)Cr 63 | /566. RY* ( 1) H 64        | 0.04  | 0.75 | 0.012 |
| 167. LP ( 5)Cr 63 | /568. RY* ( 1) H 65        | 0.03  | 0.86 | 0.012 |
| 167. LP ( 5)Cr 63 | /570. RY* ( 1) O 66        | 0.48  | 2.25 | 0.072 |
| 168. LP ( 6)Cr 63 | /568. RY* ( 1) H 65        | 36.37 | 0.09 | 0.195 |
| 168. LP ( 6)Cr 63 | /569. RY* ( 2) H 65        | 0.20  | 1.44 | 0.057 |
| 168. LP ( 6)Cr 63 | /570. RY* ( 1) O 66        | 15.67 | 1.48 | 0.514 |
| 168. LP ( 6)Cr 63 | /571. RY* ( 2) O 66        | 0.05  | 0.39 | 0.015 |
| 168. LP ( 6)Cr 63 | /572. RY* ( 3) O 66        | 1.62  | 0.66 | 0.110 |
| 168. LP ( 6)Cr 63 | /573. RY* ( 4) O 66        | 0.70  | 0.50 | 0.063 |
| 168. LP ( 6)Cr 63 | /575. RY* ( 6) O 66        | 0.05  | 4.24 | 0.047 |
| 169. LP ( 7)Cr 63 | /570. RY* ( 1) O 66        | 0.67  | 0.51 | 0.231 |
| 172. LP ( 1)Cr 63 | /664. BD* ( 1) H 64 - O 66 | 0.22  | 0.60 | 0.014 |
| 172. LP ( 1)Cr 63 | /665. BD* ( 1) H 65 - O 66 | 0.11  | 0.60 | 0.010 |
| 173. LP ( 2)Cr 63 | /664. BD* ( 1) H 64 - O 66 | 0.11  | 0.60 | 0.010 |
| 174. LP ( 3)Cr 63 | /665. BD* ( 1) H 65 - O 66 | 0.19  | 0.60 | 0.014 |

from unit 3 to unit 5

|                   |                     |        |      |       |
|-------------------|---------------------|--------|------|-------|
| 166. LP ( 4)Cr 63 | /579. RY* ( 2)C1 67 | 0.05   | 0.79 | 0.013 |
| 167. LP ( 5)Cr 63 | /581. RY* ( 4)C1 67 | 0.15   | 1.75 | 0.036 |
| 168. LP ( 6)Cr 63 | /579. RY* ( 2)C1 67 | 421.69 | 0.01 | 0.235 |
| 168. LP ( 6)Cr 63 | /580. RY* ( 3)C1 67 | 9.57   | 0.25 | 0.165 |
| 168. LP ( 6)Cr 63 | /581. RY* ( 4)C1 67 | 13.41  | 0.98 | 0.388 |
| 168. LP ( 6)Cr 63 | /583. RY* ( 6)C1 67 | 0.34   | 2.13 | 0.091 |

from unit 4 to unit 1

|                         |                            |      |      |       |
|-------------------------|----------------------------|------|------|-------|
| 87. BD ( 1) H 64 - O 66 | /262. RY* ( 2) N 11        | 0.05 | 2.72 | 0.014 |
| 88. BD ( 1) H 65 - O 66 | /221. RY* ( 1) C 6         | 0.04 | 1.65 | 0.010 |
| 88. BD ( 1) H 65 - O 66 | /222. RY* ( 2) C 6         | 0.06 | 1.99 | 0.014 |
| 88. BD ( 1) H 65 - O 66 | /224. RY* ( 4) C 6         | 0.05 | 1.83 | 0.012 |
| 175. LP ( 1) O 66       | / 13. BD* ( 2) C 4 - C 6   | 0.07 | 0.50 | 0.011 |
| 175. LP ( 1) O 66       | /222. RY* ( 2) C 6         | 0.04 | 1.74 | 0.011 |
| 175. LP ( 1) O 66       | /262. RY* ( 2) N 11        | 0.03 | 2.48 | 0.011 |
| 175. LP ( 1) O 66       | /263. RY* ( 3) N 11        | 0.04 | 1.88 | 0.011 |
| 175. LP ( 1) O 66       | /264. RY* ( 4) N 11        | 0.03 | 2.04 | 0.010 |
| 175. LP ( 1) O 66       | /602. BD* ( 1) C 6 - N 11  | 0.10 | 0.91 | 0.012 |
| 175. LP ( 1) O 66       | /609. BD* ( 2) C 9 - C 10  | 0.03 | 0.57 | 0.006 |
| 175. LP ( 1) O 66       | /612. BD* ( 1) N 11 - N 12 | 0.07 | 1.02 | 0.010 |
| 176. LP ( 2) O 66       | / 13. BD* ( 2) C 4 - C 6   | 0.06 | 0.53 | 0.010 |
| 176. LP ( 2) O 66       | /222. RY* ( 2) C 6         | 0.13 | 1.77 | 0.020 |
| 176. LP ( 2) O 66       | /224. RY* ( 4) C 6         | 0.04 | 1.61 | 0.011 |
| 176. LP ( 2) O 66       | /226. RY* ( 6) C 6         | 0.06 | 3.57 | 0.020 |
| 176. LP ( 2) O 66       | /262. RY* ( 2) N 11        | 0.25 | 2.51 | 0.033 |
| 176. LP ( 2) O 66       | /263. RY* ( 3) N 11        | 0.35 | 1.91 | 0.034 |
| 176. LP ( 2) O 66       | /270. RY* ( 2) N 12        | 0.03 | 1.39 | 0.009 |
| 176. LP ( 2) O 66       | /271. RY* ( 3) N 12        | 0.09 | 1.69 | 0.016 |
| 176. LP ( 2) O 66       | /293. RY* ( 1) C 15        | 0.05 | 1.75 | 0.012 |
| 176. LP ( 2) O 66       | /295. RY* ( 3) C 15        | 0.05 | 2.09 | 0.013 |
| 176. LP ( 2) O 66       | /297. RY* ( 5) C 15        | 0.05 | 4.38 | 0.020 |
| 176. LP ( 2) O 66       | /602. BD* ( 1) C 6 - N 11  | 0.07 | 0.94 | 0.010 |
| 176. LP ( 2) O 66       | /612. BD* ( 1) N 11 - N 12 | 0.20 | 1.05 | 0.019 |

from unit 4 to unit 2

|                         |                            |      |      |       |
|-------------------------|----------------------------|------|------|-------|
| 87. BD ( 1) H 64 - O 66 | /404. RY* ( 2) C 37        | 0.04 | 1.88 | 0.011 |
| 87. BD ( 1) H 64 - O 66 | /444. RY* ( 2) N 42        | 0.14 | 2.79 | 0.025 |
| 87. BD ( 1) H 64 - O 66 | /445. RY* ( 3) N 42        | 0.19 | 2.11 | 0.025 |
| 87. BD ( 1) H 64 - O 66 | /538. RY* ( 2) O 62        | 0.05 | 2.65 | 0.015 |
| 87. BD ( 1) H 64 - O 66 | /539. RY* ( 3) O 62        | 0.05 | 2.40 | 0.014 |
| 87. BD ( 1) H 64 - O 66 | /646. BD* ( 2) C 40 - C 41 | 0.04 | 0.81 | 0.009 |
| 87. BD ( 1) H 64 - O 66 | /657. BD* ( 1) C 46 - O 62 | 0.03 | 1.10 | 0.007 |
| 88. BD ( 1) H 65 - O 66 | /444. RY* ( 2) N 42        | 0.07 | 2.79 | 0.018 |
| 88. BD ( 1) H 65 - O 66 | /445. RY* ( 3) N 42        | 0.08 | 2.11 | 0.017 |
| 88. BD ( 1) H 65 - O 66 | /646. BD* ( 2) C 40 - C 41 | 0.03 | 0.81 | 0.007 |
| 88. BD ( 1) H 65 - O 66 | /657. BD* ( 1) C 46 - O 62 | 0.03 | 1.10 | 0.007 |
| 175. LP ( 1) O 66       | /404. RY* ( 2) C 37        | 0.08 | 1.63 | 0.014 |
| 175. LP ( 1) O 66       | /427. RY* ( 1) C 40        | 0.04 | 1.37 | 0.010 |
| 175. LP ( 1) O 66       | /445. RY* ( 3) N 42        | 0.03 | 1.86 | 0.010 |
| 176. LP ( 2) O 66       | /404. RY* ( 2) C 37        | 0.11 | 1.66 | 0.017 |
| 176. LP ( 2) O 66       | /408. RY* ( 6) C 37        | 0.03 | 4.13 | 0.015 |
| 176. LP ( 2) O 66       | /443. RY* ( 1) N 42        | 0.04 | 1.43 | 0.010 |
| 176. LP ( 2) O 66       | /444. RY* ( 2) N 42        | 0.37 | 2.57 | 0.040 |
| 176. LP ( 2) O 66       | /445. RY* ( 3) N 42        | 0.35 | 1.89 | 0.034 |
| 176. LP ( 2) O 66       | /451. RY* ( 1) N 43        | 0.05 | 1.39 | 0.011 |
| 176. LP ( 2) O 66       | /453. RY* ( 3) N 43        | 0.07 | 1.65 | 0.014 |
| 176. LP ( 2) O 66       | /475. RY* ( 1) C 46        | 0.09 | 1.75 | 0.017 |
| 176. LP ( 2) O 66       | /476. RY* ( 2) C 46        | 0.03 | 1.19 | 0.008 |
| 176. LP ( 2) O 66       | /537. RY* ( 1) O 62        | 0.03 | 1.62 | 0.008 |
| 176. LP ( 2) O 66       | /538. RY* ( 2) O 62        | 0.18 | 2.43 | 0.028 |
| 176. LP ( 2) O 66       | /539. RY* ( 3) O 62        | 0.25 | 2.19 | 0.031 |
| 176. LP ( 2) O 66       | /540. RY* ( 4) O 62        | 0.03 | 2.42 | 0.011 |
| 176. LP ( 2) O 66       | /639. BD* ( 1) C 37 - N 42 | 0.04 | 0.93 | 0.008 |
| 176. LP ( 2) O 66       | /649. BD* ( 1) N 42 - N 43 | 0.11 | 1.04 | 0.014 |
| 176. LP ( 2) O 66       | /657. BD* ( 1) C 46 - O 62 | 0.07 | 0.88 | 0.010 |

from unit 4 to unit 3

|                         |                      |      |        |       |
|-------------------------|----------------------|------|--------|-------|
| 87. BD ( 1) H 64 - O 66 | /167. LP ( 5)Cr 63   | 0.18 | 0.66   | 0.017 |
| 87. BD ( 1) H 64 - O 66 | /168. LP ( 6)Cr 63   | 3.19 | 1.43   | 0.092 |
| 87. BD ( 1) H 64 - O 66 | /169. LP ( 7)Cr 63   | 0.05 | 2.40   | 0.015 |
| 87. BD ( 1) H 64 - O 66 | /170. LP* ( 8)Cr 63  | 0.07 | 2.60   | 0.017 |
| 87. BD ( 1) H 64 - O 66 | /545. RY* ( 1)Cr 63  | 0.05 | 1.30   | 0.010 |
| 87. BD ( 1) H 64 - O 66 | /546. RY* ( 2)Cr 63  | 0.12 | 2.36   | 0.021 |
| 87. BD ( 1) H 64 - O 66 | /547. RY* ( 3)Cr 63  | 0.14 | 2.49   | 0.023 |
| 87. BD ( 1) H 64 - O 66 | /548. RY* ( 4)Cr 63  | 0.08 | 2.33   | 0.017 |
| 87. BD ( 1) H 64 - O 66 | /549. RY* ( 5)Cr 63  | 0.22 | 2.17   | 0.028 |
| 87. BD ( 1) H 64 - O 66 | /550. RY* ( 6)Cr 63  | 0.50 | 3.59   | 0.053 |
| 87. BD ( 1) H 64 - O 66 | /554. RY* ( 10)Cr 63 | 0.10 | 9.87   | 0.040 |
| 87. BD ( 1) H 64 - O 66 | /560. RY* ( 16)Cr 63 | 0.06 | 115.68 | 0.108 |

|                         |                      |       |        |       |
|-------------------------|----------------------|-------|--------|-------|
| 87. BD ( 1) H 64 - O 66 | /561. RY* ( 17)Cr 63 | 0.39  | 38.33  | 0.155 |
| 87. BD ( 1) H 64 - O 66 | /564. RY* ( 20)Cr 63 | 0.14  | 675.06 | 0.394 |
| 88. BD ( 1) H 65 - O 66 | /167. LP ( 5)Cr 63   | 0.15  | 0.67   | 0.015 |
| 88. BD ( 1) H 65 - O 66 | /168. LP ( 6)Cr 63   | 2.64  | 1.43   | 0.084 |
| 88. BD ( 1) H 65 - O 66 | /169. LP ( 7)Cr 63   | 0.03  | 2.40   | 0.011 |
| 88. BD ( 1) H 65 - O 66 | /170. LP* ( 8)Cr 63  | 0.05  | 2.60   | 0.015 |
| 88. BD ( 1) H 65 - O 66 | /545. RY* ( 1)Cr 63  | 0.04  | 1.30   | 0.010 |
| 88. BD ( 1) H 65 - O 66 | /546. RY* ( 2)Cr 63  | 0.20  | 2.37   | 0.027 |
| 88. BD ( 1) H 65 - O 66 | /547. RY* ( 3)Cr 63  | 0.11  | 2.49   | 0.021 |
| 88. BD ( 1) H 65 - O 66 | /548. RY* ( 4)Cr 63  | 0.04  | 2.34   | 0.012 |
| 88. BD ( 1) H 65 - O 66 | /550. RY* ( 6)Cr 63  | 0.36  | 3.59   | 0.045 |
| 88. BD ( 1) H 65 - O 66 | /553. RY* ( 9)Cr 63  | 0.03  | 5.22   | 0.016 |
| 88. BD ( 1) H 65 - O 66 | /554. RY* ( 10)Cr 63 | 0.08  | 9.87   | 0.035 |
| 88. BD ( 1) H 65 - O 66 | /560. RY* ( 16)Cr 63 | 0.03  | 115.68 | 0.077 |
| 88. BD ( 1) H 65 - O 66 | /561. RY* ( 17)Cr 63 | 0.20  | 38.33  | 0.110 |
| 88. BD ( 1) H 65 - O 66 | /564. RY* ( 20)Cr 63 | 0.08  | 675.07 | 0.287 |
| 138. CR ( 1) O 66       | /167. LP ( 5)Cr 63   | 0.21  | 18.86  | 0.096 |
| 138. CR ( 1) O 66       | /168. LP ( 6)Cr 63   | 1.80  | 19.62  | 0.256 |
| 175. LP ( 1) O 66       | /167. LP ( 5)Cr 63   | 0.40  | 0.42   | 0.020 |
| 175. LP ( 1) O 66       | /168. LP ( 6)Cr 63   | 2.87  | 1.18   | 0.079 |
| 175. LP ( 1) O 66       | /170. LP* ( 8)Cr 63  | 0.03  | 2.35   | 0.011 |
| 175. LP ( 1) O 66       | /171. LP* ( 9)Cr 63  | 0.29  | 2.35   | 0.033 |
| 175. LP ( 1) O 66       | /545. RY* ( 1)Cr 63  | 0.09  | 1.05   | 0.012 |
| 175. LP ( 1) O 66       | /546. RY* ( 2)Cr 63  | 0.15  | 2.12   | 0.022 |
| 175. LP ( 1) O 66       | /548. RY* ( 4)Cr 63  | 0.26  | 2.09   | 0.030 |
| 175. LP ( 1) O 66       | /550. RY* ( 6)Cr 63  | 0.19  | 3.35   | 0.032 |
| 175. LP ( 1) O 66       | /551. RY* ( 7)Cr 63  | 0.06  | 2.44   | 0.015 |
| 175. LP ( 1) O 66       | /554. RY* ( 10)Cr 63 | 0.07  | 9.63   | 0.033 |
| 175. LP ( 1) O 66       | /560. RY* ( 16)Cr 63 | 0.03  | 115.43 | 0.074 |
| 175. LP ( 1) O 66       | /561. RY* ( 17)Cr 63 | 0.19  | 38.08  | 0.107 |
| 175. LP ( 1) O 66       | /564. RY* ( 20)Cr 63 | 0.07  | 674.82 | 0.284 |
| 176. LP ( 2) O 66       | /166. LP ( 4)Cr 63   | 0.32  | 0.43   | 0.018 |
| 176. LP ( 2) O 66       | /167. LP ( 5)Cr 63   | 14.43 | 0.45   | 0.116 |
| 176. LP ( 2) O 66       | /168. LP ( 6)Cr 63   | 23.02 | 1.21   | 0.216 |
| 176. LP ( 2) O 66       | /169. LP ( 7)Cr 63   | 0.20  | 2.18   | 0.028 |
| 176. LP ( 2) O 66       | /170. LP* ( 8)Cr 63  | 2.56  | 2.38   | 0.103 |
| 176. LP ( 2) O 66       | /171. LP* ( 9)Cr 63  | 1.29  | 2.38   | 0.073 |
| 176. LP ( 2) O 66       | /545. RY* ( 1)Cr 63  | 0.30  | 1.08   | 0.024 |
| 176. LP ( 2) O 66       | /546. RY* ( 2)Cr 63  | 0.53  | 2.15   | 0.045 |
| 176. LP ( 2) O 66       | /548. RY* ( 4)Cr 63  | 0.28  | 2.12   | 0.032 |
| 176. LP ( 2) O 66       | /549. RY* ( 5)Cr 63  | 0.06  | 1.96   | 0.015 |
| 176. LP ( 2) O 66       | /550. RY* ( 6)Cr 63  | 1.87  | 3.37   | 0.105 |
| 176. LP ( 2) O 66       | /551. RY* ( 7)Cr 63  | 0.28  | 2.47   | 0.035 |
| 176. LP ( 2) O 66       | /552. RY* ( 8)Cr 63  | 0.06  | 9.26   | 0.030 |
| 176. LP ( 2) O 66       | /553. RY* ( 9)Cr 63  | 0.03  | 5.00   | 0.016 |
| 176. LP ( 2) O 66       | /554. RY* ( 10)Cr 63 | 1.41  | 9.65   | 0.154 |
| 176. LP ( 2) O 66       | /557. RY* ( 13)Cr 63 | 0.03  | 4.99   | 0.016 |
| 176. LP ( 2) O 66       | /558. RY* ( 14)Cr 63 | 0.08  | 5.14   | 0.027 |
| 176. LP ( 2) O 66       | /560. RY* ( 16)Cr 63 | 0.34  | 115.46 | 0.262 |
| 176. LP ( 2) O 66       | /561. RY* ( 17)Cr 63 | 1.88  | 38.11  | 0.354 |
| 176. LP ( 2) O 66       | /563. RY* ( 19)Cr 63 | 0.25  | 26.22  | 0.106 |
| 176. LP ( 2) O 66       | /564. RY* ( 20)Cr 63 | 0.65  | 674.85 | 0.877 |
| within unit 4           |                      |       |        |       |
| 87. BD ( 1) H 64 - O 66 | /569. RY* ( 2) H 65  | 0.27  | 2.87   | 0.035 |
| 138. CR ( 1) O 66       | /567. RY* ( 2) H 64  | 0.37  | 21.15  | 0.112 |
| 138. CR ( 1) O 66       | /569. RY* ( 2) H 65  | 0.29  | 21.06  | 0.099 |
| 175. LP ( 1) O 66       | /567. RY* ( 2) H 64  | 0.31  | 2.71   | 0.037 |
| 175. LP ( 1) O 66       | /569. RY* ( 2) H 65  | 0.38  | 2.62   | 0.040 |
| 176. LP ( 2) O 66       | /566. RY* ( 1) H 64  | 0.57  | 1.19   | 0.035 |
| 176. LP ( 2) O 66       | /568. RY* ( 1) H 65  | 0.47  | 1.30   | 0.033 |
| 176. LP ( 2) O 66       | /569. RY* ( 2) H 65  | 0.33  | 2.65   | 0.039 |
| 176. LP ( 2) O 66       | /570. RY* ( 1) O 66  | 1.57  | 2.69   | 0.086 |
| from unit 4 to unit 5   |                      |       |        |       |
| 87. BD ( 1) H 64 - O 66 | /579. RY* ( 2)C1 67  | 0.03  | 1.44   | 0.008 |
| 87. BD ( 1) H 64 - O 66 | /581. RY* ( 4)C1 67  | 0.08  | 2.41   | 0.017 |
| 88. BD ( 1) H 65 - O 66 | /579. RY* ( 2)C1 67  | 0.05  | 1.44   | 0.011 |
| 175. LP ( 1) O 66       | /579. RY* ( 2)C1 67  | 0.03  | 1.19   | 0.008 |
| 175. LP ( 1) O 66       | /581. RY* ( 4)C1 67  | 0.03  | 2.16   | 0.010 |
| 176. LP ( 2) O 66       | /579. RY* ( 2)C1 67  | 0.46  | 1.22   | 0.031 |

|                       |                            |      |      |       |
|-----------------------|----------------------------|------|------|-------|
| 176. LP ( 2) O 66     | /580. RY* ( 3)C1 67        | 0.10 | 1.46 | 0.016 |
| 176. LP ( 2) O 66     | /581. RY* ( 4)C1 67        | 0.36 | 2.19 | 0.037 |
| from unit 5 to unit 1 |                            |      |      |       |
| 177. LP ( 1)C1 67     | /347. RY* ( 1) H 24        | 0.05 | 0.82 | 0.008 |
| 177. LP ( 1)C1 67     | /609. BD* ( 2) C 9 - C 10  | 0.05 | 0.31 | 0.006 |
| 177. LP ( 1)C1 67     | /610. BD* ( 1) C 9 - H 24  | 0.22 | 0.75 | 0.016 |
| 177. LP ( 1)C1 67     | /616. BD* ( 2) C 13 - C 15 | 0.15 | 0.29 | 0.009 |
| 177. LP ( 1)C1 67     | /620. BD* ( 1) C 15 - O 19 | 0.11 | 0.60 | 0.010 |
| 178. LP ( 2)C1 67     | /602. BD* ( 1) C 6 - N 11  | 0.05 | 0.65 | 0.007 |
| 178. LP ( 2)C1 67     | /610. BD* ( 1) C 9 - H 24  | 0.12 | 0.75 | 0.012 |
| 178. LP ( 2)C1 67     | /613. BD* ( 1) N 12 - C 13 | 0.07 | 0.64 | 0.008 |
| 178. LP ( 2)C1 67     | /616. BD* ( 2) C 13 - C 15 | 0.03 | 0.29 | 0.004 |
| 178. LP ( 2)C1 67     | /620. BD* ( 1) C 15 - O 19 | 0.07 | 0.60 | 0.008 |
| 179. LP ( 3)C1 67     | /222. RY* ( 2) C 6         | 0.04 | 2.05 | 0.012 |
| 179. LP ( 3)C1 67     | /224. RY* ( 4) C 6         | 0.03 | 1.89 | 0.009 |
| 179. LP ( 3)C1 67     | /262. RY* ( 2) N 11        | 0.22 | 2.79 | 0.032 |
| 179. LP ( 3)C1 67     | /263. RY* ( 3) N 11        | 0.10 | 2.19 | 0.019 |
| 179. LP ( 3)C1 67     | /293. RY* ( 1) C 15        | 0.06 | 2.03 | 0.013 |
| 179. LP ( 3)C1 67     | /326. RY* ( 2) O 19        | 0.06 | 2.51 | 0.016 |
| 179. LP ( 3)C1 67     | /327. RY* ( 3) O 19        | 0.08 | 2.71 | 0.019 |
| 179. LP ( 3)C1 67     | /610. BD* ( 1) C 9 - H 24  | 0.05 | 1.32 | 0.010 |
| 180. LP ( 4)C1 67     | /221. RY* ( 1) C 6         | 0.03 | 1.20 | 0.009 |
| 180. LP ( 4)C1 67     | /222. RY* ( 2) C 6         | 0.23 | 1.55 | 0.025 |
| 180. LP ( 4)C1 67     | /223. RY* ( 3) C 6         | 0.06 | 1.46 | 0.013 |
| 180. LP ( 4)C1 67     | /224. RY* ( 4) C 6         | 0.14 | 1.38 | 0.019 |
| 180. LP ( 4)C1 67     | /226. RY* ( 6) C 6         | 0.06 | 3.35 | 0.019 |
| 180. LP ( 4)C1 67     | /262. RY* ( 2) N 11        | 1.30 | 2.28 | 0.074 |
| 180. LP ( 4)C1 67     | /263. RY* ( 3) N 11        | 0.41 | 1.69 | 0.036 |
| 180. LP ( 4)C1 67     | /270. RY* ( 2) N 12        | 0.03 | 1.17 | 0.008 |
| 180. LP ( 4)C1 67     | /271. RY* ( 3) N 12        | 0.03 | 1.47 | 0.009 |
| 180. LP ( 4)C1 67     | /272. RY* ( 4) N 12        | 0.04 | 2.01 | 0.013 |
| 180. LP ( 4)C1 67     | /293. RY* ( 1) C 15        | 0.32 | 1.53 | 0.030 |
| 180. LP ( 4)C1 67     | /294. RY* ( 2) C 15        | 0.07 | 0.97 | 0.011 |
| 180. LP ( 4)C1 67     | /295. RY* ( 3) C 15        | 0.11 | 1.86 | 0.019 |
| 180. LP ( 4)C1 67     | /297. RY* ( 5) C 15        | 0.10 | 4.16 | 0.028 |
| 180. LP ( 4)C1 67     | /310. RY* ( 2) C 17        | 0.03 | 1.67 | 0.010 |
| 180. LP ( 4)C1 67     | /325. RY* ( 1) O 19        | 0.04 | 1.44 | 0.010 |
| 180. LP ( 4)C1 67     | /326. RY* ( 2) O 19        | 0.33 | 2.01 | 0.035 |
| 180. LP ( 4)C1 67     | /327. RY* ( 3) O 19        | 0.44 | 2.21 | 0.042 |
| 180. LP ( 4)C1 67     | /347. RY* ( 1) H 24        | 0.03 | 0.89 | 0.007 |
| 180. LP ( 4)C1 67     | /602. BD* ( 1) C 6 - N 11  | 0.15 | 0.71 | 0.014 |
| 180. LP ( 4)C1 67     | /620. BD* ( 1) C 15 - O 19 | 0.13 | 0.66 | 0.013 |
| from unit 5 to unit 2 |                            |      |      |       |
| 177. LP ( 1)C1 67     | / 52. BD* ( 2) C 34 - C 36 | 0.19 | 0.22 | 0.013 |
| 177. LP ( 1)C1 67     | /633. BD* ( 1) C 34 - C 36 | 0.03 | 0.73 | 0.006 |
| 178. LP ( 2)C1 67     | / 52. BD* ( 2) C 34 - C 36 | 0.11 | 0.22 | 0.010 |
| 178. LP ( 2)C1 67     | / 56. BD* ( 2) C 35 - C 37 | 0.16 | 0.23 | 0.011 |
| 178. LP ( 2)C1 67     | /639. BD* ( 1) C 37 - N 42 | 0.04 | 0.64 | 0.006 |
| 178. LP ( 2)C1 67     | /649. BD* ( 1) N 42 - N 43 | 0.05 | 0.75 | 0.007 |
| 179. LP ( 3)C1 67     | / 52. BD* ( 2) C 34 - C 36 | 0.06 | 0.79 | 0.013 |
| 179. LP ( 3)C1 67     | / 56. BD* ( 2) C 35 - C 37 | 0.04 | 0.80 | 0.010 |
| 179. LP ( 3)C1 67     | /403. RY* ( 1) C 37        | 0.03 | 1.69 | 0.009 |
| 179. LP ( 3)C1 67     | /404. RY* ( 2) C 37        | 0.04 | 1.94 | 0.011 |
| 179. LP ( 3)C1 67     | /444. RY* ( 2) N 42        | 0.20 | 2.85 | 0.030 |
| 179. LP ( 3)C1 67     | /445. RY* ( 3) N 42        | 0.13 | 2.17 | 0.022 |
| 179. LP ( 3)C1 67     | /453. RY* ( 3) N 43        | 0.03 | 1.93 | 0.009 |
| 179. LP ( 3)C1 67     | /475. RY* ( 1) C 46        | 0.06 | 2.03 | 0.014 |
| 179. LP ( 3)C1 67     | /538. RY* ( 2) O 62        | 0.06 | 2.71 | 0.016 |
| 179. LP ( 3)C1 67     | /539. RY* ( 3) O 62        | 0.06 | 2.47 | 0.016 |
| 180. LP ( 4)C1 67     | / 56. BD* ( 2) C 35 - C 37 | 0.12 | 0.30 | 0.010 |
| 180. LP ( 4)C1 67     | /403. RY* ( 1) C 37        | 0.04 | 1.18 | 0.010 |
| 180. LP ( 4)C1 67     | /404. RY* ( 2) C 37        | 0.32 | 1.44 | 0.029 |
| 180. LP ( 4)C1 67     | /408. RY* ( 6) C 37        | 0.07 | 3.91 | 0.023 |
| 180. LP ( 4)C1 67     | /444. RY* ( 2) N 42        | 0.92 | 2.35 | 0.063 |
| 180. LP ( 4)C1 67     | /445. RY* ( 3) N 42        | 0.75 | 1.67 | 0.048 |
| 180. LP ( 4)C1 67     | /451. RY* ( 1) N 43        | 0.04 | 1.17 | 0.009 |
| 180. LP ( 4)C1 67     | /452. RY* ( 2) N 43        | 0.05 | 1.16 | 0.010 |
| 180. LP ( 4)C1 67     | /453. RY* ( 3) N 43        | 0.16 | 1.43 | 0.021 |
| 180. LP ( 4)C1 67     | /475. RY* ( 1) C 46        | 0.23 | 1.53 | 0.026 |



|                   |                            |      |      |       |
|-------------------|----------------------------|------|------|-------|
| 180. LP ( 4)C1 67 | /476. RY* ( 2) C 46        | 0.06 | 0.97 | 0.010 |
| 180. LP ( 4)C1 67 | /477. RY* ( 3) C 46        | 0.09 | 1.88 | 0.018 |
| 180. LP ( 4)C1 67 | /480. RY* ( 6) C 46        | 0.05 | 3.03 | 0.017 |
| 180. LP ( 4)C1 67 | /538. RY* ( 2) O 62        | 0.10 | 2.21 | 0.020 |
| 180. LP ( 4)C1 67 | /539. RY* ( 3) O 62        | 0.22 | 1.96 | 0.028 |
| 180. LP ( 4)C1 67 | /639. BD* ( 1) C 37 - N 42 | 0.07 | 0.71 | 0.010 |
| 180. LP ( 4)C1 67 | /649. BD* ( 1) N 42 - N 43 | 0.21 | 0.82 | 0.017 |

from unit 5 to unit 3

|                   |                      |       |        |       |
|-------------------|----------------------|-------|--------|-------|
| 139. CR ( 1)C1 67 | /168. LP ( 6)Cr 63   | 0.25  | 100.55 | 0.217 |
| 140. CR ( 2)C1 67 | /167. LP ( 5)Cr 63   | 0.10  | 10.62  | 0.049 |
| 140. CR ( 2)C1 67 | /168. LP ( 6)Cr 63   | 2.04  | 11.39  | 0.208 |
| 143. CR ( 5)C1 67 | /167. LP ( 5)Cr 63   | 0.04  | 7.02   | 0.024 |
| 143. CR ( 5)C1 67 | /168. LP ( 6)Cr 63   | 0.22  | 7.79   | 0.056 |
| 177. LP ( 1)C1 67 | /168. LP ( 6)Cr 63   | 0.03  | 0.92   | 0.007 |
| 177. LP ( 1)C1 67 | /171. LP* ( 9)Cr 63  | 0.10  | 2.09   | 0.018 |
| 177. LP ( 1)C1 67 | /546. RY* ( 2)Cr 63  | 0.12  | 1.86   | 0.019 |
| 177. LP ( 1)C1 67 | /549. RY* ( 5)Cr 63  | 0.10  | 1.67   | 0.016 |
| 178. LP ( 2)C1 67 | /168. LP ( 6)Cr 63   | 0.03  | 0.92   | 0.008 |
| 178. LP ( 2)C1 67 | /170. LP* ( 8)Cr 63  | 0.12  | 2.10   | 0.020 |
| 178. LP ( 2)C1 67 | /546. RY* ( 2)Cr 63  | 0.07  | 1.86   | 0.015 |
| 178. LP ( 2)C1 67 | /549. RY* ( 5)Cr 63  | 0.09  | 1.67   | 0.016 |
| 179. LP ( 3)C1 67 | /166. LP ( 4)Cr 63   | 0.26  | 0.71   | 0.022 |
| 179. LP ( 3)C1 67 | /167. LP ( 5)Cr 63   | 0.79  | 0.73   | 0.037 |
| 179. LP ( 3)C1 67 | /168. LP ( 6)Cr 63   | 7.19  | 1.49   | 0.140 |
| 179. LP ( 3)C1 67 | /545. RY* ( 1)Cr 63  | 0.14  | 1.36   | 0.018 |
| 179. LP ( 3)C1 67 | /546. RY* ( 2)Cr 63  | 0.25  | 2.43   | 0.031 |
| 179. LP ( 3)C1 67 | /547. RY* ( 3)Cr 63  | 0.22  | 2.55   | 0.030 |
| 179. LP ( 3)C1 67 | /549. RY* ( 5)Cr 63  | 0.19  | 2.24   | 0.026 |
| 179. LP ( 3)C1 67 | /550. RY* ( 6)Cr 63  | 0.89  | 3.65   | 0.072 |
| 179. LP ( 3)C1 67 | /551. RY* ( 7)Cr 63  | 0.07  | 2.75   | 0.018 |
| 179. LP ( 3)C1 67 | /554. RY* ( 10)Cr 63 | 0.05  | 9.93   | 0.029 |
| 179. LP ( 3)C1 67 | /560. RY* ( 16)Cr 63 | 0.13  | 115.74 | 0.157 |
| 179. LP ( 3)C1 67 | /561. RY* ( 17)Cr 63 | 0.86  | 38.39  | 0.230 |
| 179. LP ( 3)C1 67 | /564. RY* ( 20)Cr 63 | 0.32  | 675.13 | 0.586 |
| 180. LP ( 4)C1 67 | /166. LP ( 4)Cr 63   | 10.73 | 0.20   | 0.069 |
| 180. LP ( 4)C1 67 | /167. LP ( 5)Cr 63   | 16.41 | 0.22   | 0.085 |
| 180. LP ( 4)C1 67 | /168. LP ( 6)Cr 63   | 29.99 | 0.99   | 0.218 |
| 180. LP ( 4)C1 67 | /169. LP ( 7)Cr 63   | 1.99  | 1.96   | 0.084 |
| 180. LP ( 4)C1 67 | /545. RY* ( 1)Cr 63  | 0.93  | 0.86   | 0.038 |
| 180. LP ( 4)C1 67 | /546. RY* ( 2)Cr 63  | 0.82  | 1.92   | 0.054 |
| 180. LP ( 4)C1 67 | /547. RY* ( 3)Cr 63  | 1.32  | 2.05   | 0.070 |
| 180. LP ( 4)C1 67 | /549. RY* ( 5)Cr 63  | 0.90  | 1.73   | 0.053 |
| 180. LP ( 4)C1 67 | /550. RY* ( 6)Cr 63  | 3.21  | 3.15   | 0.136 |
| 180. LP ( 4)C1 67 | /551. RY* ( 7)Cr 63  | 0.42  | 2.25   | 0.042 |
| 180. LP ( 4)C1 67 | /552. RY* ( 8)Cr 63  | 0.48  | 9.04   | 0.089 |
| 180. LP ( 4)C1 67 | /554. RY* ( 10)Cr 63 | 0.31  | 9.43   | 0.073 |
| 180. LP ( 4)C1 67 | /555. RY* ( 11)Cr 63 | 0.05  | 4.70   | 0.021 |
| 180. LP ( 4)C1 67 | /556. RY* ( 12)Cr 63 | 0.03  | 8.38   | 0.021 |
| 180. LP ( 4)C1 67 | /559. RY* ( 15)Cr 63 | 0.14  | 26.04  | 0.081 |
| 180. LP ( 4)C1 67 | /560. RY* ( 16)Cr 63 | 0.56  | 115.24 | 0.343 |
| 180. LP ( 4)C1 67 | /561. RY* ( 17)Cr 63 | 3.29  | 37.89  | 0.477 |
| 180. LP ( 4)C1 67 | /562. RY* ( 18)Cr 63 | 0.03  | 4.85   | 0.017 |
| 180. LP ( 4)C1 67 | /564. RY* ( 20)Cr 63 | 1.06  | 674.62 | 1.144 |

from unit 5 to unit 4

|                   |                            |      |      |       |
|-------------------|----------------------------|------|------|-------|
| 177. LP ( 1)C1 67 | /664. BD* ( 1) H 64 - O 66 | 0.10 | 0.60 | 0.010 |
| 177. LP ( 1)C1 67 | /665. BD* ( 1) H 65 - O 66 | 0.05 | 0.60 | 0.007 |
| 178. LP ( 2)C1 67 | /664. BD* ( 1) H 64 - O 66 | 0.03 | 0.60 | 0.006 |
| 178. LP ( 2)C1 67 | /665. BD* ( 1) H 65 - O 66 | 0.14 | 0.61 | 0.012 |
| 179. LP ( 3)C1 67 | /566. RY* ( 1) H 64        | 0.05 | 1.47 | 0.011 |
| 179. LP ( 3)C1 67 | /568. RY* ( 1) H 65        | 0.05 | 1.58 | 0.012 |
| 179. LP ( 3)C1 67 | /570. RY* ( 1) O 66        | 0.23 | 2.97 | 0.033 |
| 180. LP ( 4)C1 67 | /566. RY* ( 1) H 64        | 0.32 | 0.97 | 0.024 |
| 180. LP ( 4)C1 67 | /568. RY* ( 1) H 65        | 0.42 | 1.08 | 0.029 |
| 180. LP ( 4)C1 67 | /570. RY* ( 1) O 66        | 1.40 | 2.47 | 0.079 |
| 180. LP ( 4)C1 67 | /572. RY* ( 3) O 66        | 0.11 | 1.65 | 0.018 |

within unit 5

|                   |                     |      |      |       |
|-------------------|---------------------|------|------|-------|
| 180. LP ( 4)C1 67 | /579. RY* ( 2)C1 67 | 0.63 | 1.00 | 0.034 |
| 180. LP ( 4)C1 67 | /580. RY* ( 3)C1 67 | 0.43 | 1.24 | 0.031 |

180. LP ( 4)C1 67

/581. RY\* ( 4)C1 67

1.43 1.97 0.072

**Table (S8):** Summary of Natural Population Analysis of the Mn(II) complex:

| Atom | No | Natural Charge | Core    | Valence | Rydberg | Total   |
|------|----|----------------|---------|---------|---------|---------|
| C    | 1  | 0.31891        | 1.99861 | 3.66363 | 0.01885 | 5.68109 |
| C    | 2  | -0.09395       | 1.99882 | 4.08293 | 0.01219 | 6.09395 |
| C    | 3  | -0.21623       | 1.99901 | 4.20116 | 0.01606 | 6.21623 |
| C    | 4  | -0.06428       | 1.99883 | 4.05142 | 0.01403 | 6.06428 |
| C    | 5  | -0.21755       | 1.99893 | 4.20188 | 0.01674 | 6.21755 |
| C    | 6  | 0.17364        | 1.99870 | 3.80431 | 0.02335 | 5.82636 |
| C    | 7  | -0.23549       | 1.99903 | 4.21965 | 0.01681 | 6.23549 |
| C    | 8  | -0.20422       | 1.99909 | 4.18991 | 0.01523 | 6.20422 |
| C    | 9  | -0.20385       | 1.99902 | 4.18858 | 0.01625 | 6.20385 |
| C    | 10 | -0.22308       | 1.99906 | 4.20948 | 0.01454 | 6.22308 |
| N    | 11 | -0.41509       | 1.99936 | 5.38613 | 0.02961 | 7.41509 |
| N    | 12 | -0.04994       | 1.99918 | 5.03041 | 0.02035 | 7.04994 |
| C    | 13 | 0.02482        | 1.99873 | 3.95709 | 0.01936 | 5.97518 |
| C    | 14 | -0.28139       | 1.99905 | 4.25695 | 0.02539 | 6.28139 |
| C    | 15 | 0.23846        | 1.99869 | 3.73920 | 0.02366 | 5.76154 |
| C    | 16 | -0.18251       | 1.99910 | 4.16343 | 0.01999 | 6.18251 |
| C    | 17 | -0.26125       | 1.99901 | 4.23864 | 0.02360 | 6.26125 |
| C    | 18 | -0.23377       | 1.99912 | 4.21917 | 0.01548 | 6.23377 |
| O    | 19 | -0.72266       | 1.99984 | 6.71658 | 0.00624 | 8.72266 |
| O    | 20 | -0.65330       | 1.99979 | 6.64968 | 0.00383 | 8.65330 |
| H    | 21 | 0.22757        | 0.00000 | 0.76998 | 0.00245 | 0.77243 |
| H    | 22 | 0.20033        | 0.00000 | 0.79672 | 0.00295 | 0.79967 |
| H    | 23 | 0.20956        | 0.00000 | 0.78923 | 0.00121 | 0.79044 |
| H    | 24 | 0.22107        | 0.00000 | 0.77528 | 0.00366 | 0.77893 |
| H    | 25 | 0.20962        | 0.00000 | 0.78860 | 0.00178 | 0.79038 |
| H    | 26 | 0.20443        | 0.00000 | 0.79310 | 0.00246 | 0.79557 |
| H    | 27 | 0.20298        | 0.00000 | 0.79579 | 0.00123 | 0.79702 |
| H    | 28 | 0.20880        | 0.00000 | 0.78850 | 0.00269 | 0.79120 |
| H    | 29 | 0.20865        | 0.00000 | 0.79003 | 0.00132 | 0.79135 |
| H    | 30 | 0.49754        | 0.00000 | 0.50129 | 0.00117 | 0.50246 |
| H    | 31 | 0.22334        | 0.00000 | 0.77375 | 0.00291 | 0.77666 |
| C    | 32 | 0.31251        | 1.99867 | 3.66979 | 0.01904 | 5.68749 |
| C    | 33 | -0.08378       | 1.99884 | 4.06779 | 0.01715 | 6.08378 |
| C    | 34 | -0.18629       | 1.99902 | 4.16831 | 0.01896 | 6.18629 |
| C    | 35 | -0.06154       | 1.99886 | 4.04373 | 0.01895 | 6.06154 |
| C    | 36 | -0.21584       | 1.99893 | 4.19601 | 0.02090 | 6.21584 |
| C    | 37 | 0.14231        | 1.99878 | 3.83488 | 0.02402 | 5.85769 |
| C    | 38 | -0.25969       | 1.99907 | 4.24363 | 0.01699 | 6.25969 |
| C    | 39 | -0.17053       | 1.99909 | 4.15446 | 0.01697 | 6.17053 |
| C    | 40 | -0.27017       | 1.99906 | 4.25280 | 0.01831 | 6.27017 |
| C    | 41 | -0.19760       | 1.99907 | 4.18131 | 0.01722 | 6.19760 |
| N    | 42 | -0.43173       | 1.99936 | 5.40230 | 0.03008 | 7.43173 |
| N    | 43 | -0.14896       | 1.99924 | 5.12664 | 0.02308 | 7.14896 |
| C    | 44 | 0.08992        | 1.99871 | 3.89183 | 0.01954 | 5.91008 |
| C    | 45 | -0.20943       | 1.99902 | 4.19640 | 0.01401 | 6.20943 |
| C    | 46 | 0.31195        | 1.99867 | 3.66863 | 0.02076 | 5.68805 |
| C    | 47 | -0.18440       | 1.99908 | 4.17204 | 0.01328 | 6.18440 |
| C    | 48 | -0.22409       | 1.99899 | 4.21072 | 0.01438 | 6.22409 |
| C    | 49 | -0.20839       | 1.99908 | 4.19596 | 0.01334 | 6.20839 |
| O    | 50 | -0.64897       | 1.99979 | 6.64533 | 0.00384 | 8.64897 |
| H    | 51 | 0.21973        | 0.00000 | 0.77772 | 0.00255 | 0.78027 |
| H    | 52 | 0.20273        | 0.00000 | 0.79443 | 0.00284 | 0.79727 |
| H    | 53 | 0.20437        | 0.00000 | 0.79387 | 0.00176 | 0.79563 |
| H    | 54 | 0.21216        | 0.00000 | 0.78386 | 0.00399 | 0.78784 |
| H    | 55 | 0.20450        | 0.00000 | 0.79370 | 0.00180 | 0.79550 |
| H    | 56 | 0.22292        | 0.00000 | 0.77440 | 0.00269 | 0.77708 |
| H    | 57 | 0.21616        | 0.00000 | 0.78266 | 0.00119 | 0.78384 |
| H    | 58 | 0.22426        | 0.00000 | 0.77286 | 0.00288 | 0.77574 |
| H    | 59 | 0.21350        | 0.00000 | 0.78517 | 0.00133 | 0.78650 |
| H    | 60 | 0.49887        | 0.00000 | 0.49985 | 0.00127 | 0.50113 |
| H    | 61 | 0.21166        | 0.00000 | 0.78425 | 0.00408 | 0.78834 |
| O    | 62 | -0.94009       | 1.99981 | 6.93369 | 0.00659 | 8.94009 |

|    |    |          |          |         |         |          |
|----|----|----------|----------|---------|---------|----------|
| H  | 63 | 0.50216  | 0.00000  | 0.49389 | 0.00395 | 0.49784  |
| H  | 64 | 0.50612  | 0.00000  | 0.48934 | 0.00454 | 0.49388  |
| O  | 65 | -0.76144 | 1.99984  | 6.75617 | 0.00543 | 8.76144  |
| H  | 66 | 0.50523  | 0.00000  | 0.49067 | 0.00410 | 0.49477  |
| H  | 67 | 0.50059  | 0.00000  | 0.49554 | 0.00388 | 0.49941  |
| O  | 68 | -0.92844 | 1.99981  | 6.92157 | 0.00706 | 8.92844  |
| Mn | 69 | 1.51852  | 17.99029 | 5.47740 | 0.01379 | 23.48148 |

```
=====
* Total *      0.00000    101.95204    216.25606    0.79190    319.00000
```

**Table (S9): NBO data of the Mn(II) complex:**

| Donor NBO (i) |          | Acceptor NBO (j) |           | kcal/mol | a.u. | a.u.  |
|---------------|----------|------------------|-----------|----------|------|-------|
| within unit 1 |          |                  |           |          |      |       |
| 1. BD ( 1) C  | 1 - C 2  | /190. RY* ( 2) C | 3         | 0.61     | 1.94 | 0.043 |
| 1. BD ( 1) C  | 1 - C 2  | /191. RY* ( 3) C | 3         | 0.29     | 1.96 | 0.031 |
| 1. BD ( 1) C  | 1 - C 2  | /197. RY* ( 1) C | 4         | 0.68     | 2.20 | 0.049 |
| 1. BD ( 1) C  | 1 - C 2  | /222. RY* ( 2) C | 7         | 0.52     | 1.77 | 0.038 |
| 1. BD ( 1) C  | 1 - C 2  | /584. BD* ( 1) C | 1 - C 3   | 1.65     | 1.26 | 0.058 |
| 1. BD ( 1) C  | 1 - C 2  | /586. BD* ( 1) C | 2 - C 4   | 1.55     | 1.28 | 0.056 |
| 1. BD ( 1) C  | 1 - C 2  | /587. BD* ( 1) C | 2 - C 7   | 0.70     | 1.10 | 0.035 |
| 1. BD ( 1) C  | 1 - C 2  | /590. BD* ( 1) C | 3 - H 21  | 1.48     | 1.08 | 0.051 |
| 1. BD ( 1) C  | 1 - C 2  | /593. BD* ( 1) C | 4 - C 9   | 2.05     | 1.11 | 0.060 |
| 1. BD ( 1) C  | 1 - C 2  | /597. BD* ( 1) C | 7 - C 8   | 0.64     | 1.30 | 0.037 |
| 2. BD ( 2) C  | 1 - C 2  | /189. RY* ( 1) C | 3         | 1.71     | 0.77 | 0.049 |
| 2. BD ( 2) C  | 1 - C 2  | /325. RY* ( 1) O | 20        | 0.55     | 1.13 | 0.034 |
| 2. BD ( 2) C  | 1 - C 2  | /583. BD* ( 2) C | 1 - C 2   | 1.03     | 0.24 | 0.023 |
| 2. BD ( 2) C  | 1 - C 2  | /589. BD* ( 2) C | 3 - C 5   | 18.21    | 0.25 | 0.090 |
| 2. BD ( 2) C  | 1 - C 2  | /592. BD* ( 2) C | 4 - C 6   | 7.16     | 0.25 | 0.061 |
| 2. BD ( 2) C  | 1 - C 2  | /598. BD* ( 2) C | 7 - C 8   | 2.30     | 0.29 | 0.035 |
| 3. BD ( 1) C  | 1 - C 3  | /182. RY* ( 2) C | 2         | 0.81     | 2.21 | 0.054 |
| 3. BD ( 1) C  | 1 - C 3  | /207. RY* ( 3) C | 5         | 0.69     | 1.96 | 0.047 |
| 3. BD ( 1) C  | 1 - C 3  | /582. BD* ( 1) C | 1 - C 2   | 1.60     | 1.19 | 0.055 |
| 3. BD ( 1) C  | 1 - C 3  | /585. BD* ( 1) C | 1 - O 20  | 0.32     | 1.04 | 0.023 |
| 3. BD ( 1) C  | 1 - C 3  | /587. BD* ( 1) C | 2 - C 7   | 1.20     | 1.22 | 0.048 |
| 3. BD ( 1) C  | 1 - C 3  | /588. BD* ( 1) C | 3 - C 5   | 1.01     | 1.23 | 0.045 |
| 3. BD ( 1) C  | 1 - C 3  | /590. BD* ( 1) C | 3 - H 21  | 0.71     | 1.20 | 0.037 |
| 3. BD ( 1) C  | 1 - C 3  | /595. BD* ( 1) C | 5 - H 31  | 0.69     | 1.21 | 0.037 |
| 3. BD ( 1) C  | 1 - C 3  | /620. BD* ( 1) O | 20 - H 30 | 0.75     | 1.08 | 0.036 |
| 4. BD ( 1) C  | 1 - O 20 | /173. RY* ( 1) C | 1         | 0.25     | 1.87 | 0.028 |
| 4. BD ( 1) C  | 1 - O 20 | /182. RY* ( 2) C | 2         | 0.27     | 2.34 | 0.032 |
| 4. BD ( 1) C  | 1 - O 20 | /190. RY* ( 2) C | 3         | 0.30     | 2.19 | 0.032 |
| 4. BD ( 1) C  | 1 - O 20 | /584. BD* ( 1) C | 1 - C 3   | 0.41     | 1.51 | 0.032 |
| 4. BD ( 1) C  | 1 - O 20 | /586. BD* ( 1) C | 2 - C 4   | 0.57     | 1.53 | 0.037 |
| 4. BD ( 1) C  | 1 - O 20 | /588. BD* ( 1) C | 3 - C 5   | 1.08     | 1.37 | 0.049 |
| 5. BD ( 1) C  | 2 - C 4  | /175. RY* ( 3) C | 1         | 0.40     | 2.18 | 0.037 |
| 5. BD ( 1) C  | 2 - C 4  | /214. RY* ( 2) C | 6         | 0.40     | 1.89 | 0.035 |
| 5. BD ( 1) C  | 2 - C 4  | /222. RY* ( 2) C | 7         | 0.30     | 1.85 | 0.030 |
| 5. BD ( 1) C  | 2 - C 4  | /238. RY* ( 2) C | 9         | 0.30     | 1.82 | 0.030 |
| 5. BD ( 1) C  | 2 - C 4  | /582. BD* ( 1) C | 1 - C 2   | 1.52     | 1.15 | 0.053 |
| 5. BD ( 1) C  | 2 - C 4  | /585. BD* ( 1) C | 1 - O 20  | 1.32     | 1.00 | 0.046 |
| 5. BD ( 1) C  | 2 - C 4  | /587. BD* ( 1) C | 2 - C 7   | 1.92     | 1.18 | 0.060 |
| 5. BD ( 1) C  | 2 - C 4  | /591. BD* ( 1) C | 4 - C 6   | 1.88     | 1.18 | 0.060 |
| 5. BD ( 1) C  | 2 - C 4  | /593. BD* ( 1) C | 4 - C 9   | 1.88     | 1.20 | 0.060 |
| 5. BD ( 1) C  | 2 - C 4  | /596. BD* ( 1) C | 6 - N 11  | 1.33     | 1.10 | 0.049 |
| 5. BD ( 1) C  | 2 - C 4  | /599. BD* ( 1) C | 7 - H 22  | 0.75     | 1.18 | 0.038 |
| 5. BD ( 1) C  | 2 - C 4  | /604. BD* ( 1) C | 9 - H 24  | 0.67     | 1.19 | 0.036 |
| 6. BD ( 1) C  | 2 - C 7  | /173. RY* ( 1) C | 1         | 0.28     | 1.60 | 0.027 |
| 6. BD ( 1) C  | 2 - C 7  | /175. RY* ( 3) C | 1         | 0.34     | 2.08 | 0.034 |
| 6. BD ( 1) C  | 2 - C 7  | /197. RY* ( 1) C | 4         | 0.44     | 2.18 | 0.039 |
| 6. BD ( 1) C  | 2 - C 7  | /229. RY* ( 1) C | 8         | 0.34     | 1.82 | 0.032 |
| 6. BD ( 1) C  | 2 - C 7  | /231. RY* ( 3) C | 8         | 0.78     | 1.93 | 0.049 |
| 6. BD ( 1) C  | 2 - C 7  | /582. BD* ( 1) C | 1 - C 2   | 0.57     | 1.05 | 0.031 |
| 6. BD ( 1) C  | 2 - C 7  | /584. BD* ( 1) C | 1 - C 3   | 0.70     | 1.24 | 0.037 |
| 6. BD ( 1) C  | 2 - C 7  | /586. BD* ( 1) C | 2 - C 4   | 2.19     | 1.26 | 0.066 |
| 6. BD ( 1) C  | 2 - C 7  | /591. BD* ( 1) C | 4 - C 6   | 2.42     | 1.09 | 0.065 |
| 6. BD ( 1) C  | 2 - C 7  | /597. BD* ( 1) C | 7 - C 8   | 1.38     | 1.28 | 0.053 |
| 6. BD ( 1) C  | 2 - C 7  | /599. BD* ( 1) C | 7 - H 22  | 0.30     | 1.08 | 0.023 |
| 6. BD ( 1) C  | 2 - C 7  | /601. BD* ( 1) C | 8 - H 23  | 1.48     | 1.09 | 0.051 |
| 7. BD ( 1) C  | 3 - C 5  | /173. RY* ( 1) C | 1         | 0.48     | 1.62 | 0.035 |
| 7. BD ( 1) C  | 3 - C 5  | /174. RY* ( 2) C | 1         | 0.34     | 1.38 | 0.027 |
| 7. BD ( 1) C  | 3 - C 5  | /175. RY* ( 3) C | 1         | 0.31     | 2.09 | 0.032 |
| 7. BD ( 1) C  | 3 - C 5  | /215. RY* ( 3) C | 6         | 0.92     | 1.76 | 0.051 |
| 7. BD ( 1) C  | 3 - C 5  | /584. BD* ( 1) C | 1 - C 3   | 1.09     | 1.26 | 0.047 |
| 7. BD ( 1) C  | 3 - C 5  | /585. BD* ( 1) C | 1 - O 20  | 2.57     | 0.92 | 0.061 |
| 7. BD ( 1) C  | 3 - C 5  | /590. BD* ( 1) C | 3 - H 21  | 0.33     | 1.08 | 0.024 |

|                        |                            |       |      |       |
|------------------------|----------------------------|-------|------|-------|
| 7. BD ( 1) C 3 - C 5   | /594. BD* ( 1) C 5 - C 6   | 1.34  | 1.28 | 0.052 |
| 7. BD ( 1) C 3 - C 5   | /595. BD* ( 1) C 5 - H 31  | 0.28  | 1.09 | 0.022 |
| 7. BD ( 1) C 3 - C 5   | /596. BD* ( 1) C 6 - N 11  | 2.85  | 1.02 | 0.068 |
| 8. BD ( 2) C 3 - C 5   | /174. RY* ( 2) C 1         | 0.36  | 0.99 | 0.025 |
| 8. BD ( 2) C 3 - C 5   | /213. RY* ( 1) C 6         | 0.34  | 1.15 | 0.026 |
| 8. BD ( 2) C 3 - C 5   | /583. BD* ( 2) C 1 - C 2   | 4.82  | 0.24 | 0.052 |
| 8. BD ( 2) C 3 - C 5   | /592. BD* ( 2) C 4 - C 6   | 3.29  | 0.25 | 0.044 |
| 9. BD ( 1) C 3 - H 21  | /175. RY* ( 3) C 1         | 0.46  | 1.96 | 0.038 |
| 9. BD ( 1) C 3 - H 21  | /178. RY* ( 6) C 1         | 0.28  | 8.67 | 0.063 |
| 9. BD ( 1) C 3 - H 21  | /206. RY* ( 2) C 5         | 0.52  | 1.77 | 0.039 |
| 9. BD ( 1) C 3 - H 21  | /582. BD* ( 1) C 1 - C 2   | 2.95  | 0.94 | 0.067 |
| 9. BD ( 1) C 3 - H 21  | /584. BD* ( 1) C 1 - C 3   | 0.47  | 1.13 | 0.029 |
| 9. BD ( 1) C 3 - H 21  | /585. BD* ( 1) C 1 - O 20  | 0.89  | 0.79 | 0.033 |
| 9. BD ( 1) C 3 - H 21  | /594. BD* ( 1) C 5 - C 6   | 1.47  | 1.15 | 0.052 |
| 9. BD ( 1) C 3 - H 21  | /595. BD* ( 1) C 5 - H 31  | 0.27  | 0.96 | 0.020 |
| 10. BD ( 1) C 4 - C 6  | /181. RY* ( 1) C 2         | 0.71  | 2.31 | 0.051 |
| 10. BD ( 1) C 4 - C 6  | /206. RY* ( 2) C 5         | 0.53  | 1.90 | 0.040 |
| 10. BD ( 1) C 4 - C 6  | /238. RY* ( 2) C 9         | 0.51  | 1.74 | 0.038 |
| 10. BD ( 1) C 4 - C 6  | /254. RY* ( 2) N 11        | 0.25  | 2.05 | 0.029 |
| 10. BD ( 1) C 4 - C 6  | /586. BD* ( 1) C 2 - C 4   | 1.85  | 1.28 | 0.061 |
| 10. BD ( 1) C 4 - C 6  | /587. BD* ( 1) C 2 - C 7   | 1.96  | 1.10 | 0.058 |
| 10. BD ( 1) C 4 - C 6  | /593. BD* ( 1) C 4 - C 9   | 0.90  | 1.11 | 0.040 |
| 10. BD ( 1) C 4 - C 6  | /594. BD* ( 1) C 5 - C 6   | 1.76  | 1.28 | 0.060 |
| 10. BD ( 1) C 4 - C 6  | /595. BD* ( 1) C 5 - H 31  | 1.59  | 1.09 | 0.053 |
| 10. BD ( 1) C 4 - C 6  | /596. BD* ( 1) C 6 - N 11  | 0.30  | 1.02 | 0.022 |
| 10. BD ( 1) C 4 - C 6  | /602. BD* ( 1) C 9 - C 10  | 0.66  | 1.31 | 0.037 |
| 11. BD ( 2) C 4 - C 6  | /205. RY* ( 1) C 5         | 1.88  | 0.80 | 0.053 |
| 11. BD ( 2) C 4 - C 6  | /583. BD* ( 2) C 1 - C 2   | 6.25  | 0.23 | 0.054 |
| 11. BD ( 2) C 4 - C 6  | /589. BD* ( 2) C 3 - C 5   | 23.68 | 0.24 | 0.099 |
| 11. BD ( 2) C 4 - C 6  | /592. BD* ( 2) C 4 - C 6   | 2.19  | 0.24 | 0.033 |
| 11. BD ( 2) C 4 - C 6  | /603. BD* ( 2) C 9 - C 10  | 2.15  | 0.29 | 0.033 |
| 11. BD ( 2) C 4 - C 6  | /606. BD* ( 1) N 11 - N 12 | 3.34  | 0.74 | 0.068 |
| 12. BD ( 1) C 4 - C 9  | /181. RY* ( 1) C 2         | 0.35  | 2.29 | 0.036 |
| 12. BD ( 1) C 4 - C 9  | /213. RY* ( 1) C 6         | 0.46  | 1.51 | 0.034 |
| 12. BD ( 1) C 4 - C 9  | /214. RY* ( 2) C 6         | 0.65  | 1.79 | 0.043 |
| 12. BD ( 1) C 4 - C 9  | /245. RY* ( 1) C 10        | 0.31  | 1.91 | 0.031 |
| 12. BD ( 1) C 4 - C 9  | /247. RY* ( 3) C 10        | 0.79  | 1.94 | 0.050 |
| 12. BD ( 1) C 4 - C 9  | /582. BD* ( 1) C 1 - C 2   | 2.35  | 1.05 | 0.063 |
| 12. BD ( 1) C 4 - C 9  | /586. BD* ( 1) C 2 - C 4   | 2.18  | 1.26 | 0.066 |
| 12. BD ( 1) C 4 - C 9  | /591. BD* ( 1) C 4 - C 6   | 0.90  | 1.08 | 0.040 |
| 12. BD ( 1) C 4 - C 9  | /594. BD* ( 1) C 5 - C 6   | 0.96  | 1.26 | 0.044 |
| 12. BD ( 1) C 4 - C 9  | /602. BD* ( 1) C 9 - C 10  | 1.39  | 1.29 | 0.054 |
| 12. BD ( 1) C 4 - C 9  | /604. BD* ( 1) C 9 - H 24  | 0.34  | 1.09 | 0.024 |
| 12. BD ( 1) C 4 - C 9  | /605. BD* ( 1) C 10 - H 25 | 1.58  | 1.08 | 0.052 |
| 13. BD ( 1) C 5 - C 6  | /191. RY* ( 3) C 3         | 0.71  | 2.08 | 0.049 |
| 13. BD ( 1) C 5 - C 6  | /198. RY* ( 2) C 4         | 0.79  | 2.30 | 0.054 |
| 13. BD ( 1) C 5 - C 6  | /253. RY* ( 1) N 11        | 0.43  | 2.12 | 0.038 |
| 13. BD ( 1) C 5 - C 6  | /588. BD* ( 1) C 3 - C 5   | 1.22  | 1.23 | 0.049 |
| 13. BD ( 1) C 5 - C 6  | /590. BD* ( 1) C 3 - H 21  | 0.62  | 1.20 | 0.035 |
| 13. BD ( 1) C 5 - C 6  | /591. BD* ( 1) C 4 - C 6   | 1.80  | 1.22 | 0.060 |
| 13. BD ( 1) C 5 - C 6  | /593. BD* ( 1) C 4 - C 9   | 1.17  | 1.23 | 0.048 |
| 13. BD ( 1) C 5 - C 6  | /595. BD* ( 1) C 5 - H 31  | 0.85  | 1.21 | 0.040 |
| 13. BD ( 1) C 5 - C 6  | /596. BD* ( 1) C 6 - N 11  | 0.76  | 1.14 | 0.037 |
| 13. BD ( 1) C 5 - C 6  | /606. BD* ( 1) N 11 - N 12 | 0.51  | 1.25 | 0.032 |
| 14. BD ( 1) C 5 - H 31 | /190. RY* ( 2) C 3         | 0.50  | 1.80 | 0.038 |
| 14. BD ( 1) C 5 - H 31 | /213. RY* ( 1) C 6         | 0.40  | 1.40 | 0.030 |
| 14. BD ( 1) C 5 - H 31 | /214. RY* ( 2) C 6         | 0.73  | 1.68 | 0.044 |
| 14. BD ( 1) C 5 - H 31 | /584. BD* ( 1) C 1 - C 3   | 1.37  | 1.13 | 0.050 |
| 14. BD ( 1) C 5 - H 31 | /590. BD* ( 1) C 3 - H 21  | 0.26  | 0.95 | 0.020 |
| 14. BD ( 1) C 5 - H 31 | /591. BD* ( 1) C 4 - C 6   | 3.18  | 0.97 | 0.070 |
| 14. BD ( 1) C 5 - H 31 | /594. BD* ( 1) C 5 - C 6   | 0.72  | 1.15 | 0.036 |
| 14. BD ( 1) C 5 - H 31 | /596. BD* ( 1) C 6 - N 11  | 0.66  | 0.89 | 0.031 |
| 15. BD ( 1) C 6 - N 11 | /198. RY* ( 2) C 4         | 0.69  | 2.33 | 0.051 |
| 15. BD ( 1) C 6 - N 11 | /206. RY* ( 2) C 5         | 0.61  | 2.04 | 0.045 |
| 15. BD ( 1) C 6 - N 11 | /261. RY* ( 1) N 12        | 0.83  | 1.62 | 0.047 |
| 15. BD ( 1) C 6 - N 11 | /262. RY* ( 2) N 12        | 0.25  | 1.58 | 0.025 |
| 15. BD ( 1) C 6 - N 11 | /586. BD* ( 1) C 2 - C 4   | 0.77  | 1.42 | 0.042 |
| 15. BD ( 1) C 6 - N 11 | /588. BD* ( 1) C 3 - C 5   | 1.32  | 1.25 | 0.051 |
| 15. BD ( 1) C 6 - N 11 | /591. BD* ( 1) C 4 - C 6   | 0.51  | 1.24 | 0.032 |
| 15. BD ( 1) C 6 - N 11 | /594. BD* ( 1) C 5 - C 6   | 0.93  | 1.42 | 0.046 |
| 15. BD ( 1) C 6 - N 11 | /606. BD* ( 1) N 11 - N 12 | 0.46  | 1.28 | 0.031 |

|                         |                            |       |      |       |
|-------------------------|----------------------------|-------|------|-------|
| 15. BD ( 1) C 6 - N 11  | /607. BD* ( 1) N 12 - C 13 | 2.78  | 1.15 | 0.072 |
| 16. BD ( 1) C 7 - C 8   | /181. RY* ( 1) C 2         | 0.55  | 2.40 | 0.046 |
| 16. BD ( 1) C 7 - C 8   | /182. RY* ( 2) C 2         | 0.42  | 2.18 | 0.038 |
| 16. BD ( 1) C 7 - C 8   | /245. RY* ( 1) C 10        | 0.48  | 2.02 | 0.039 |
| 16. BD ( 1) C 7 - C 8   | /247. RY* ( 3) C 10        | 0.39  | 2.06 | 0.036 |
| 16. BD ( 1) C 7 - C 8   | /582. BD* ( 1) C 1 - C 2   | 1.37  | 1.16 | 0.051 |
| 16. BD ( 1) C 7 - C 8   | /587. BD* ( 1) C 2 - C 7   | 1.47  | 1.19 | 0.053 |
| 16. BD ( 1) C 7 - C 8   | /599. BD* ( 1) C 7 - H 22  | 0.86  | 1.18 | 0.040 |
| 16. BD ( 1) C 7 - C 8   | /600. BD* ( 1) C 8 - C 10  | 1.20  | 1.22 | 0.048 |
| 16. BD ( 1) C 7 - C 8   | /601. BD* ( 1) C 8 - H 23  | 0.76  | 1.19 | 0.038 |
| 16. BD ( 1) C 7 - C 8   | /605. BD* ( 1) C 10 - H 25 | 0.79  | 1.19 | 0.039 |
| 17. BD ( 2) C 7 - C 8   | /184. RY* ( 4) C 2         | 0.27  | 1.00 | 0.022 |
| 17. BD ( 2) C 7 - C 8   | /246. RY* ( 2) C 10        | 0.44  | 0.81 | 0.025 |
| 17. BD ( 2) C 7 - C 8   | /583. BD* ( 2) C 1 - C 2   | 10.43 | 0.25 | 0.076 |
| 17. BD ( 2) C 7 - C 8   | /603. BD* ( 2) C 9 - C 10  | 5.03  | 0.31 | 0.055 |
| 18. BD ( 1) C 7 - H 22  | /181. RY* ( 1) C 2         | 0.73  | 2.18 | 0.051 |
| 18. BD ( 1) C 7 - H 22  | /229. RY* ( 1) C 8         | 0.70  | 1.71 | 0.044 |
| 18. BD ( 1) C 7 - H 22  | /586. BD* ( 1) C 2 - C 4   | 1.62  | 1.15 | 0.054 |
| 18. BD ( 1) C 7 - H 22  | /597. BD* ( 1) C 7 - C 8   | 0.69  | 1.17 | 0.036 |
| 18. BD ( 1) C 7 - H 22  | /600. BD* ( 1) C 8 - C 10  | 2.75  | 1.00 | 0.066 |
| 18. BD ( 1) C 7 - H 22  | /601. BD* ( 1) C 8 - H 23  | 0.47  | 0.97 | 0.027 |
| 19. BD ( 1) C 8 - C 10  | /223. RY* ( 3) C 7         | 0.87  | 1.77 | 0.050 |
| 19. BD ( 1) C 8 - C 10  | /239. RY* ( 3) C 9         | 0.91  | 1.71 | 0.050 |
| 19. BD ( 1) C 8 - C 10  | /597. BD* ( 1) C 7 - C 8   | 1.32  | 1.28 | 0.052 |
| 19. BD ( 1) C 8 - C 10  | /599. BD* ( 1) C 7 - H 22  | 1.61  | 1.08 | 0.053 |
| 19. BD ( 1) C 8 - C 10  | /601. BD* ( 1) C 8 - H 23  | 0.30  | 1.09 | 0.023 |
| 19. BD ( 1) C 8 - C 10  | /602. BD* ( 1) C 9 - C 10  | 1.36  | 1.29 | 0.053 |
| 19. BD ( 1) C 8 - C 10  | /604. BD* ( 1) C 9 - H 24  | 1.65  | 1.09 | 0.054 |
| 19. BD ( 1) C 8 - C 10  | /605. BD* ( 1) C 10 - H 25 | 0.30  | 1.09 | 0.023 |
| 20. BD ( 1) C 8 - H 23  | /222. RY* ( 2) C 7         | 0.70  | 1.63 | 0.043 |
| 20. BD ( 1) C 8 - H 23  | /245. RY* ( 1) C 10        | 0.68  | 1.79 | 0.044 |
| 20. BD ( 1) C 8 - H 23  | /587. BD* ( 1) C 2 - C 7   | 3.15  | 0.95 | 0.069 |
| 20. BD ( 1) C 8 - H 23  | /597. BD* ( 1) C 7 - C 8   | 0.64  | 1.16 | 0.034 |
| 20. BD ( 1) C 8 - H 23  | /599. BD* ( 1) C 7 - H 22  | 0.53  | 0.95 | 0.028 |
| 20. BD ( 1) C 8 - H 23  | /602. BD* ( 1) C 9 - C 10  | 1.41  | 1.17 | 0.051 |
| 21. BD ( 1) C 9 - C 10  | /197. RY* ( 1) C 4         | 0.74  | 2.29 | 0.052 |
| 21. BD ( 1) C 9 - C 10  | /198. RY* ( 2) C 4         | 0.35  | 2.28 | 0.036 |
| 21. BD ( 1) C 9 - C 10  | /229. RY* ( 1) C 8         | 0.43  | 1.93 | 0.036 |
| 21. BD ( 1) C 9 - C 10  | /231. RY* ( 3) C 8         | 0.42  | 2.03 | 0.037 |
| 21. BD ( 1) C 9 - C 10  | /591. BD* ( 1) C 4 - C 6   | 1.29  | 1.19 | 0.050 |
| 21. BD ( 1) C 9 - C 10  | /593. BD* ( 1) C 4 - C 9   | 1.43  | 1.20 | 0.052 |
| 21. BD ( 1) C 9 - C 10  | /600. BD* ( 1) C 8 - C 10  | 1.25  | 1.22 | 0.049 |
| 21. BD ( 1) C 9 - C 10  | /601. BD* ( 1) C 8 - H 23  | 0.78  | 1.19 | 0.039 |
| 21. BD ( 1) C 9 - C 10  | /604. BD* ( 1) C 9 - H 24  | 0.83  | 1.20 | 0.040 |
| 21. BD ( 1) C 9 - C 10  | /605. BD* ( 1) C 10 - H 25 | 0.80  | 1.19 | 0.039 |
| 22. BD ( 2) C 9 - C 10  | /199. RY* ( 3) C 4         | 0.29  | 0.89 | 0.021 |
| 22. BD ( 2) C 9 - C 10  | /230. RY* ( 2) C 8         | 0.43  | 0.77 | 0.024 |
| 22. BD ( 2) C 9 - C 10  | /592. BD* ( 2) C 4 - C 6   | 10.77 | 0.25 | 0.078 |
| 22. BD ( 2) C 9 - C 10  | /598. BD* ( 2) C 7 - C 8   | 6.07  | 0.29 | 0.059 |
| 23. BD ( 1) C 9 - H 24  | /197. RY* ( 1) C 4         | 0.72  | 2.05 | 0.049 |
| 23. BD ( 1) C 9 - H 24  | /245. RY* ( 1) C 10        | 0.63  | 1.78 | 0.043 |
| 23. BD ( 1) C 9 - H 24  | /586. BD* ( 1) C 2 - C 4   | 1.76  | 1.13 | 0.056 |
| 23. BD ( 1) C 9 - H 24  | /600. BD* ( 1) C 8 - C 10  | 2.80  | 0.98 | 0.066 |
| 23. BD ( 1) C 9 - H 24  | /602. BD* ( 1) C 9 - C 10  | 0.73  | 1.16 | 0.037 |
| 23. BD ( 1) C 9 - H 24  | /605. BD* ( 1) C 10 - H 25 | 0.49  | 0.95 | 0.027 |
| 24. BD ( 1) C 10 - H 25 | /229. RY* ( 1) C 8         | 0.53  | 1.69 | 0.038 |
| 24. BD ( 1) C 10 - H 25 | /238. RY* ( 2) C 9         | 0.59  | 1.59 | 0.039 |
| 24. BD ( 1) C 10 - H 25 | /593. BD* ( 1) C 4 - C 9   | 3.05  | 0.97 | 0.069 |
| 24. BD ( 1) C 10 - H 25 | /597. BD* ( 1) C 7 - C 8   | 1.36  | 1.15 | 0.050 |
| 24. BD ( 1) C 10 - H 25 | /602. BD* ( 1) C 9 - C 10  | 0.71  | 1.16 | 0.036 |
| 24. BD ( 1) C 10 - H 25 | /604. BD* ( 1) C 9 - H 24  | 0.48  | 0.96 | 0.027 |
| 25. BD ( 1) N 11 - N 12 | /213. RY* ( 1) C 6         | 0.96  | 1.87 | 0.054 |
| 25. BD ( 1) N 11 - N 12 | /269. RY* ( 1) C 13        | 0.85  | 2.09 | 0.053 |
| 25. BD ( 1) N 11 - N 12 | /270. RY* ( 2) C 13        | 0.63  | 2.42 | 0.050 |
| 25. BD ( 1) N 11 - N 12 | /594. BD* ( 1) C 5 - C 6   | 0.28  | 1.62 | 0.027 |
| 25. BD ( 1) N 11 - N 12 | /596. BD* ( 1) C 6 - N 11  | 0.49  | 1.36 | 0.033 |
| 25. BD ( 1) N 11 - N 12 | /607. BD* ( 1) N 12 - C 13 | 0.40  | 1.35 | 0.029 |
| 25. BD ( 1) N 11 - N 12 | /608. BD* ( 1) C 13 - C 14 | 0.55  | 1.44 | 0.036 |
| 26. BD ( 1) N 12 - C 13 | /213. RY* ( 1) C 6         | 0.31  | 1.68 | 0.029 |
| 26. BD ( 1) N 12 - C 13 | /253. RY* ( 1) N 11        | 0.47  | 2.15 | 0.040 |
| 26. BD ( 1) N 12 - C 13 | /254. RY* ( 2) N 11        | 0.53  | 2.20 | 0.043 |

|                          |                            |      |      |       |
|--------------------------|----------------------------|------|------|-------|
| 26. BD ( 1) N 12 - C 13  | /255. RY* ( 3) N 11        | 0.54 | 2.06 | 0.042 |
| 26. BD ( 1) N 12 - C 13  | /256. RY* ( 4) N 11        | 0.27 | 2.33 | 0.032 |
| 26. BD ( 1) N 12 - C 13  | /278. RY* ( 2) C 14        | 0.39 | 2.10 | 0.036 |
| 26. BD ( 1) N 12 - C 13  | /285. RY* ( 1) C 15        | 0.46 | 1.96 | 0.038 |
| 26. BD ( 1) N 12 - C 13  | /596. BD* ( 1) C 6 - N 11  | 2.41 | 1.17 | 0.067 |
| 26. BD ( 1) N 12 - C 13  | /608. BD* ( 1) C 13 - C 14 | 0.32 | 1.24 | 0.025 |
| 26. BD ( 1) N 12 - C 13  | /609. BD* ( 1) C 13 - C 15 | 0.99 | 1.39 | 0.047 |
| 26. BD ( 1) N 12 - C 13  | /611. BD* ( 1) C 14 - C 16 | 0.42 | 1.44 | 0.031 |
| 26. BD ( 1) N 12 - C 13  | /613. BD* ( 1) C 15 - C 17 | 1.19 | 1.24 | 0.049 |
| 27. BD ( 1) C 13 - C 14  | /261. RY* ( 1) N 12        | 0.38 | 1.47 | 0.030 |
| 27. BD ( 1) C 13 - C 14  | /287. RY* ( 3) C 15        | 0.29 | 1.96 | 0.030 |
| 27. BD ( 1) C 13 - C 14  | /288. RY* ( 4) C 15        | 0.33 | 1.68 | 0.030 |
| 27. BD ( 1) C 13 - C 14  | /294. RY* ( 2) C 16        | 0.38 | 1.85 | 0.034 |
| 27. BD ( 1) C 13 - C 14  | /295. RY* ( 3) C 16        | 0.70 | 1.99 | 0.048 |
| 27. BD ( 1) C 13 - C 14  | /606. BD* ( 1) N 11 - N 12 | 1.68 | 1.13 | 0.055 |
| 27. BD ( 1) C 13 - C 14  | /607. BD* ( 1) N 12 - C 13 | 0.42 | 1.00 | 0.026 |
| 27. BD ( 1) C 13 - C 14  | /609. BD* ( 1) C 13 - C 15 | 1.88 | 1.24 | 0.061 |
| 27. BD ( 1) C 13 - C 14  | /611. BD* ( 1) C 14 - C 16 | 0.99 | 1.29 | 0.045 |
| 27. BD ( 1) C 13 - C 14  | /612. BD* ( 1) C 14 - H 26 | 0.25 | 1.09 | 0.021 |
| 27. BD ( 1) C 13 - C 14  | /614. BD* ( 1) C 15 - O 19 | 2.73 | 0.96 | 0.065 |
| 27. BD ( 1) C 13 - C 14  | /616. BD* ( 1) C 16 - H 27 | 1.45 | 1.09 | 0.051 |
| 28. BD ( 1) C 13 - C 15  | /263. RY* ( 3) N 12        | 0.34 | 1.87 | 0.032 |
| 28. BD ( 1) C 13 - C 15  | /278. RY* ( 2) C 14        | 0.44 | 2.07 | 0.038 |
| 28. BD ( 1) C 13 - C 15  | /302. RY* ( 2) C 17        | 0.68 | 2.09 | 0.048 |
| 28. BD ( 1) C 13 - C 15  | /607. BD* ( 1) N 12 - C 13 | 0.70 | 1.12 | 0.035 |
| 28. BD ( 1) C 13 - C 15  | /608. BD* ( 1) C 13 - C 14 | 1.85 | 1.21 | 0.060 |
| 28. BD ( 1) C 13 - C 15  | /612. BD* ( 1) C 14 - H 26 | 0.57 | 1.20 | 0.033 |
| 28. BD ( 1) C 13 - C 15  | /613. BD* ( 1) C 15 - C 17 | 1.42 | 1.21 | 0.053 |
| 28. BD ( 1) C 13 - C 15  | /614. BD* ( 1) C 15 - O 19 | 0.37 | 1.08 | 0.025 |
| 28. BD ( 1) C 13 - C 15  | /618. BD* ( 1) C 17 - H 28 | 0.57 | 1.21 | 0.033 |
| 29. BD ( 2) C 13 - C 15  | / 34. BD* ( 1) C 16 - C 17 | 0.40 | 0.13 | 0.053 |
| 29. BD ( 2) C 13 - C 15  | /262. RY* ( 2) N 12        | 0.41 | 1.09 | 0.027 |
| 29. BD ( 2) C 13 - C 15  | /277. RY ( 1) C 14         | 0.79 | 0.80 | 0.032 |
| 29. BD ( 2) C 13 - C 15  | /301. RY ( 1) C 17         | 1.12 | 0.81 | 0.038 |
| 29. BD ( 2) C 13 - C 15  | /318. RY* ( 2) O 19        | 0.39 | 1.40 | 0.030 |
| 29. BD ( 2) C 13 - C 15  | /610. BD* ( 2) C 13 - C 15 | 0.30 | 0.33 | 0.014 |
| 30. BD ( 1) C 14 - C 16  | /270. RY* ( 2) C 13        | 1.01 | 2.18 | 0.059 |
| 30. BD ( 1) C 14 - C 16  | /309. RY* ( 1) C 18        | 0.55 | 1.94 | 0.041 |
| 30. BD ( 1) C 14 - C 16  | /311. RY* ( 3) C 18        | 0.43 | 2.05 | 0.038 |
| 30. BD ( 1) C 14 - C 16  | /607. BD* ( 1) N 12 - C 13 | 1.38 | 1.11 | 0.050 |
| 30. BD ( 1) C 14 - C 16  | /608. BD* ( 1) C 13 - C 14 | 0.95 | 1.20 | 0.043 |
| 30. BD ( 1) C 14 - C 16  | /612. BD* ( 1) C 14 - H 26 | 0.71 | 1.19 | 0.037 |
| 30. BD ( 1) C 14 - C 16  | /615. BD* ( 1) C 16 - C 18 | 0.93 | 1.22 | 0.043 |
| 30. BD ( 1) C 14 - C 16  | /616. BD* ( 1) C 16 - H 27 | 0.58 | 1.20 | 0.033 |
| 30. BD ( 1) C 14 - C 16  | /619. BD* ( 1) C 18 - H 29 | 0.86 | 1.21 | 0.041 |
| 31. BD ( 1) C 14 - H 26  | /269. RY* ( 1) C 13        | 0.35 | 1.61 | 0.030 |
| 31. BD ( 1) C 14 - H 26  | /294. RY* ( 2) C 16        | 0.62 | 1.71 | 0.041 |
| 31. BD ( 1) C 14 - H 26  | /607. BD* ( 1) N 12 - C 13 | 0.36 | 0.86 | 0.022 |
| 31. BD ( 1) C 14 - H 26  | /609. BD* ( 1) C 13 - C 15 | 1.71 | 1.10 | 0.055 |
| 31. BD ( 1) C 14 - H 26  | /611. BD* ( 1) C 14 - C 16 | 0.54 | 1.15 | 0.032 |
| 31. BD ( 1) C 14 - H 26  | /615. BD* ( 1) C 16 - C 18 | 2.73 | 0.97 | 0.065 |
| 31. BD ( 1) C 14 - H 26  | /616. BD* ( 1) C 16 - H 27 | 0.51 | 0.95 | 0.028 |
| 32. BD ( 1) C 15 - C 17  | /269. RY* ( 1) C 13        | 0.59 | 1.75 | 0.041 |
| 32. BD ( 1) C 15 - C 17  | /271. RY* ( 3) C 13        | 0.30 | 1.46 | 0.027 |
| 32. BD ( 1) C 15 - C 17  | /309. RY* ( 1) C 18        | 0.34 | 1.84 | 0.032 |
| 32. BD ( 1) C 15 - C 17  | /311. RY* ( 3) C 18        | 0.79 | 1.94 | 0.050 |
| 32. BD ( 1) C 15 - C 17  | /607. BD* ( 1) N 12 - C 13 | 2.85 | 1.01 | 0.068 |
| 32. BD ( 1) C 15 - C 17  | /609. BD* ( 1) C 13 - C 15 | 1.68 | 1.24 | 0.058 |
| 32. BD ( 1) C 15 - C 17  | /617. BD* ( 1) C 17 - C 18 | 1.08 | 1.30 | 0.047 |
| 32. BD ( 1) C 15 - C 17  | /619. BD* ( 1) C 18 - H 29 | 1.62 | 1.10 | 0.054 |
| 33. BD ( 1) C 15 - O 19  | /285. RY* ( 1) C 15        | 0.55 | 2.01 | 0.042 |
| 33. BD ( 1) C 15 - O 19  | /608. BD* ( 1) C 13 - C 14 | 1.26 | 1.29 | 0.051 |
| 33. BD ( 1) C 15 - O 19  | /609. BD* ( 1) C 13 - C 15 | 0.63 | 1.44 | 0.038 |
| 33. BD ( 1) C 15 - O 19  | /617. BD* ( 1) C 17 - C 18 | 0.50 | 1.50 | 0.035 |
| 34. BD* ( 1) C 16 - C 17 | /277. RY ( 1) C 14         | 1.47 | 0.67 | 0.040 |
| 34. BD* ( 1) C 16 - C 17 | /286. RY* ( 2) C 15        | 0.28 | 0.93 | 0.020 |
| 34. BD* ( 1) C 16 - C 17 | /610. BD* ( 2) C 13 - C 15 | 6.55 | 0.20 | 0.051 |
| 34. BD* ( 1) C 16 - C 17 | /615. BD* ( 1) C 16 - C 18 | 0.42 | 0.65 | 0.021 |
| 35. BD ( 1) C 16 - C 17  | /277. RY ( 1) C 14         | 0.83 | 0.63 | 0.039 |
| 35. BD ( 1) C 16 - C 17  | /310. RY* ( 2) C 18        | 1.61 | 0.64 | 0.056 |
| 35. BD ( 1) C 16 - C 17  | /610. BD* ( 2) C 13 - C 15 | 9.86 | 0.16 | 0.058 |



|                         |                            |      |       |       |
|-------------------------|----------------------------|------|-------|-------|
| 36. BD ( 1) C 16 - C 18 | /279. RY* ( 3) C 14        | 0.88 | 1.89  | 0.052 |
| 36. BD ( 1) C 16 - C 18 | /303. RY* ( 3) C 17        | 0.88 | 1.86  | 0.051 |
| 36. BD ( 1) C 16 - C 18 | /611. BD* ( 1) C 14 - C 16 | 1.00 | 1.28  | 0.045 |
| 36. BD ( 1) C 16 - C 18 | /612. BD* ( 1) C 14 - H 26 | 1.65 | 1.08  | 0.053 |
| 36. BD ( 1) C 16 - C 18 | /617. BD* ( 1) C 17 - C 18 | 1.17 | 1.29  | 0.049 |
| 36. BD ( 1) C 16 - C 18 | /618. BD* ( 1) C 17 - H 28 | 1.56 | 1.08  | 0.052 |
| 36. BD ( 1) C 16 - C 18 | /619. BD* ( 1) C 18 - H 29 | 0.29 | 1.09  | 0.023 |
| 37. BD ( 1) C 16 - H 27 | /278. RY* ( 2) C 14        | 0.78 | 1.82  | 0.048 |
| 37. BD ( 1) C 16 - H 27 | /309. RY* ( 1) C 18        | 0.66 | 1.70  | 0.043 |
| 37. BD ( 1) C 16 - H 27 | /608. BD* ( 1) C 13 - C 14 | 3.03 | 0.96  | 0.068 |
| 37. BD ( 1) C 16 - H 27 | /611. BD* ( 1) C 14 - C 16 | 0.46 | 1.16  | 0.029 |
| 37. BD ( 1) C 16 - H 27 | /612. BD* ( 1) C 14 - H 26 | 0.53 | 0.95  | 0.028 |
| 37. BD ( 1) C 16 - H 27 | /617. BD* ( 1) C 17 - C 18 | 1.45 | 1.17  | 0.052 |
| 38. BD ( 1) C 17 - C 18 | /285. RY* ( 1) C 15        | 0.51 | 1.91  | 0.040 |
| 38. BD ( 1) C 17 - C 18 | /287. RY* ( 3) C 15        | 0.57 | 2.06  | 0.043 |
| 38. BD ( 1) C 17 - C 18 | /294. RY* ( 2) C 16        | 0.51 | 1.95  | 0.040 |
| 38. BD ( 1) C 17 - C 18 | /295. RY* ( 3) C 16        | 0.38 | 2.09  | 0.036 |
| 38. BD ( 1) C 17 - C 18 | /613. BD* ( 1) C 15 - C 17 | 0.80 | 1.19  | 0.039 |
| 38. BD ( 1) C 17 - C 18 | /614. BD* ( 1) C 15 - O 19 | 1.19 | 1.06  | 0.045 |
| 38. BD ( 1) C 17 - C 18 | /615. BD* ( 1) C 16 - C 18 | 1.08 | 1.21  | 0.046 |
| 38. BD ( 1) C 17 - C 18 | /616. BD* ( 1) C 16 - H 27 | 0.76 | 1.19  | 0.038 |
| 38. BD ( 1) C 17 - C 18 | /618. BD* ( 1) C 17 - H 28 | 0.77 | 1.19  | 0.038 |
| 38. BD ( 1) C 17 - C 18 | /619. BD* ( 1) C 18 - H 29 | 0.75 | 1.20  | 0.038 |
| 39. BD ( 1) C 17 - H 28 | /285. RY* ( 1) C 15        | 0.39 | 1.67  | 0.032 |
| 39. BD ( 1) C 17 - H 28 | /309. RY* ( 1) C 18        | 0.67 | 1.70  | 0.043 |
| 39. BD ( 1) C 17 - H 28 | /609. BD* ( 1) C 13 - C 15 | 1.64 | 1.10  | 0.054 |
| 39. BD ( 1) C 17 - H 28 | /614. BD* ( 1) C 15 - O 19 | 0.54 | 0.83  | 0.027 |
| 39. BD ( 1) C 17 - H 28 | /615. BD* ( 1) C 16 - C 18 | 2.90 | 0.97  | 0.067 |
| 39. BD ( 1) C 17 - H 28 | /617. BD* ( 1) C 17 - C 18 | 0.63 | 1.16  | 0.034 |
| 39. BD ( 1) C 17 - H 28 | /619. BD* ( 1) C 18 - H 29 | 0.51 | 0.96  | 0.028 |
| 40. BD ( 1) C 18 - H 29 | /294. RY* ( 2) C 16        | 0.61 | 1.72  | 0.041 |
| 40. BD ( 1) C 18 - H 29 | /302. RY* ( 2) C 17        | 0.77 | 1.84  | 0.048 |
| 40. BD ( 1) C 18 - H 29 | /611. BD* ( 1) C 14 - C 16 | 1.31 | 1.15  | 0.049 |
| 40. BD ( 1) C 18 - H 29 | /613. BD* ( 1) C 15 - C 17 | 2.80 | 0.95  | 0.066 |
| 40. BD ( 1) C 18 - H 29 | /617. BD* ( 1) C 17 - C 18 | 0.64 | 1.16  | 0.034 |
| 40. BD ( 1) C 18 - H 29 | /618. BD* ( 1) C 17 - H 28 | 0.46 | 0.95  | 0.026 |
| 41. BD ( 1) O 20 - H 30 | /173. RY* ( 1) C 1         | 1.02 | 1.70  | 0.053 |
| 41. BD ( 1) O 20 - H 30 | /174. RY* ( 2) C 1         | 0.45 | 1.46  | 0.032 |
| 41. BD ( 1) O 20 - H 30 | /584. BD* ( 1) C 1 - C 3   | 1.60 | 1.34  | 0.059 |
| 89. CR ( 1) C 1         | /181. RY* ( 1) C 2         | 0.62 | 11.78 | 0.108 |
| 89. CR ( 1) C 1         | /191. RY* ( 3) C 3         | 1.17 | 11.44 | 0.146 |
| 89. CR ( 1) C 1         | /584. BD* ( 1) C 1 - C 3   | 1.00 | 10.73 | 0.131 |
| 89. CR ( 1) C 1         | /585. BD* ( 1) C 1 - O 20  | 0.66 | 10.39 | 0.105 |
| 89. CR ( 1) C 1         | /586. BD* ( 1) C 2 - C 4   | 0.30 | 10.75 | 0.072 |
| 89. CR ( 1) C 1         | /587. BD* ( 1) C 2 - C 7   | 0.33 | 10.57 | 0.075 |
| 89. CR ( 1) C 1         | /588. BD* ( 1) C 3 - C 5   | 0.45 | 10.59 | 0.088 |
| 90. CR ( 1) C 2         | /173. RY* ( 1) C 1         | 0.31 | 11.03 | 0.074 |
| 90. CR ( 1) C 2         | /197. RY* ( 1) C 4         | 0.28 | 11.61 | 0.072 |
| 90. CR ( 1) C 2         | /198. RY* ( 2) C 4         | 1.12 | 11.60 | 0.144 |
| 90. CR ( 1) C 2         | /223. RY* ( 3) C 7         | 0.50 | 11.20 | 0.094 |
| 90. CR ( 1) C 2         | /584. BD* ( 1) C 1 - C 3   | 0.29 | 10.67 | 0.070 |
| 90. CR ( 1) C 2         | /586. BD* ( 1) C 2 - C 4   | 0.66 | 10.69 | 0.106 |
| 90. CR ( 1) C 2         | /591. BD* ( 1) C 4 - C 6   | 0.59 | 10.52 | 0.101 |
| 90. CR ( 1) C 2         | /593. BD* ( 1) C 4 - C 9   | 0.53 | 10.53 | 0.095 |
| 90. CR ( 1) C 2         | /597. BD* ( 1) C 7 - C 8   | 0.27 | 10.71 | 0.068 |
| 91. CR ( 1) C 3         | /175. RY* ( 3) C 1         | 1.45 | 11.49 | 0.163 |
| 91. CR ( 1) C 3         | /208. RY* ( 4) C 5         | 0.41 | 11.10 | 0.085 |
| 91. CR ( 1) C 3         | /334. RY* ( 2) H 21        | 0.30 | 12.29 | 0.076 |
| 91. CR ( 1) C 3         | /582. BD* ( 1) C 1 - C 2   | 0.61 | 10.47 | 0.102 |
| 91. CR ( 1) C 3         | /584. BD* ( 1) C 1 - C 3   | 0.29 | 10.66 | 0.070 |
| 91. CR ( 1) C 3         | /585. BD* ( 1) C 1 - O 20  | 0.37 | 10.32 | 0.078 |
| 91. CR ( 1) C 3         | /594. BD* ( 1) C 5 - C 6   | 0.34 | 10.68 | 0.077 |
| 92. CR ( 1) C 4         | /182. RY* ( 2) C 2         | 1.18 | 11.49 | 0.147 |
| 92. CR ( 1) C 4         | /215. RY* ( 3) C 6         | 0.77 | 11.17 | 0.117 |
| 92. CR ( 1) C 4         | /239. RY* ( 3) C 9         | 0.56 | 11.13 | 0.100 |
| 92. CR ( 1) C 4         | /582. BD* ( 1) C 1 - C 2   | 0.57 | 10.47 | 0.099 |
| 92. CR ( 1) C 4         | /586. BD* ( 1) C 2 - C 4   | 0.57 | 10.68 | 0.099 |
| 92. CR ( 1) C 4         | /587. BD* ( 1) C 2 - C 7   | 0.51 | 10.50 | 0.093 |
| 92. CR ( 1) C 4         | /594. BD* ( 1) C 5 - C 6   | 0.34 | 10.69 | 0.077 |
| 92. CR ( 1) C 4         | /596. BD* ( 1) C 6 - N 11  | 0.26 | 10.42 | 0.066 |
| 92. CR ( 1) C 4         | /602. BD* ( 1) C 9 - C 10  | 0.29 | 10.71 | 0.070 |

|      |    |   |    |   |    |       |     |   |    |   |        |      |       |       |       |
|------|----|---|----|---|----|-------|-----|---|----|---|--------|------|-------|-------|-------|
| 93.  | CR | ( | 1) | C | 5  | /214. | RY* | ( | 2) | C | 6      | 0.46 | 11.20 | 0.090 |       |
| 93.  | CR | ( | 1) | C | 5  | /215. | RY* | ( | 3) | C | 6      | 0.76 | 11.16 | 0.116 |       |
| 93.  | CR | ( | 1) | C | 5  | /216. | RY* | ( | 4) | C | 6      | 0.54 | 11.09 | 0.098 |       |
| 93.  | CR | ( | 1) | C | 5  | /584. | BD* | ( | 1) | C | 1 - C  | 3    | 0.33  | 10.65 | 0.075 |
| 93.  | CR | ( | 1) | C | 5  | /591. | BD* | ( | 1) | C | 4 - C  | 6    | 0.64  | 10.49 | 0.105 |
| 93.  | CR | ( | 1) | C | 5  | /594. | BD* | ( | 1) | C | 5 - C  | 6    | 0.42  | 10.67 | 0.085 |
| 93.  | CR | ( | 1) | C | 5  | /596. | BD* | ( | 1) | C | 6 - N  | 11   | 0.44  | 10.41 | 0.086 |
| 94.  | CR | ( | 1) | C | 6  | /197. | RY* | ( | 1) | C | 4      | 0.66 | 11.64 | 0.111 |       |
| 94.  | CR | ( | 1) | C | 6  | /207. | RY* | ( | 3) | C | 5      | 1.25 | 11.28 | 0.150 |       |
| 94.  | CR | ( | 1) | C | 6  | /586. | BD* | ( | 1) | C | 2 - C  | 4    | 0.36  | 10.72 | 0.079 |
| 94.  | CR | ( | 1) | C | 6  | /588. | BD* | ( | 1) | C | 3 - C  | 5    | 0.48  | 10.55 | 0.090 |
| 94.  | CR | ( | 1) | C | 6  | /593. | BD* | ( | 1) | C | 4 - C  | 9    | 0.33  | 10.55 | 0.075 |
| 94.  | CR | ( | 1) | C | 6  | /594. | BD* | ( | 1) | C | 5 - C  | 6    | 0.77  | 10.72 | 0.116 |
| 94.  | CR | ( | 1) | C | 6  | /606. | BD* | ( | 1) | N | 11 - N | 12   | 0.39  | 10.58 | 0.082 |
| 95.  | CR | ( | 1) | C | 7  | /181. | RY* | ( | 1) | C | 2      | 0.25 | 11.69 | 0.068 |       |
| 95.  | CR | ( | 1) | C | 7  | /182. | RY* | ( | 2) | C | 2      | 0.34 | 11.47 | 0.079 |       |
| 95.  | CR | ( | 1) | C | 7  | /231. | RY* | ( | 3) | C | 8      | 1.14 | 11.33 | 0.144 |       |
| 95.  | CR | ( | 1) | C | 7  | /336. | RY* | ( | 2) | H | 22     | 0.27 | 12.26 | 0.073 |       |
| 95.  | CR | ( | 1) | C | 7  | /582. | BD* | ( | 1) | C | 1 - C  | 2    | 0.35  | 10.45 | 0.077 |
| 95.  | CR | ( | 1) | C | 7  | /586. | BD* | ( | 1) | C | 2 - C  | 4    | 0.37  | 10.66 | 0.080 |
| 95.  | CR | ( | 1) | C | 7  | /597. | BD* | ( | 1) | C | 7 - C  | 8    | 0.45  | 10.68 | 0.088 |
| 95.  | CR | ( | 1) | C | 7  | /600. | BD* | ( | 1) | C | 8 - C  | 10   | 0.52  | 10.51 | 0.094 |
| 96.  | CR | ( | 1) | C | 8  | /222. | RY* | ( | 2) | C | 7      | 0.27 | 11.15 | 0.070 |       |
| 96.  | CR | ( | 1) | C | 8  | /223. | RY* | ( | 3) | C | 7      | 0.64 | 11.16 | 0.106 |       |
| 96.  | CR | ( | 1) | C | 8  | /224. | RY* | ( | 4) | C | 7      | 0.42 | 11.07 | 0.086 |       |
| 96.  | CR | ( | 1) | C | 8  | /247. | RY* | ( | 3) | C | 10     | 0.45 | 11.34 | 0.090 |       |
| 96.  | CR | ( | 1) | C | 8  | /338. | RY* | ( | 2) | H | 23     | 0.31 | 11.94 | 0.076 |       |
| 96.  | CR | ( | 1) | C | 8  | /587. | BD* | ( | 1) | C | 2 - C  | 7    | 0.61  | 10.48 | 0.102 |
| 96.  | CR | ( | 1) | C | 8  | /597. | BD* | ( | 1) | C | 7 - C  | 8    | 0.38  | 10.68 | 0.080 |
| 96.  | CR | ( | 1) | C | 8  | /602. | BD* | ( | 1) | C | 9 - C  | 10   | 0.32  | 10.69 | 0.074 |
| 97.  | CR | ( | 1) | C | 9  | /198. | RY* | ( | 2) | C | 4      | 0.45 | 11.56 | 0.091 |       |
| 97.  | CR | ( | 1) | C | 9  | /247. | RY* | ( | 3) | C | 10     | 1.07 | 11.34 | 0.139 |       |
| 97.  | CR | ( | 1) | C | 9  | /586. | BD* | ( | 1) | C | 2 - C  | 4    | 0.43  | 10.65 | 0.086 |
| 97.  | CR | ( | 1) | C | 9  | /591. | BD* | ( | 1) | C | 4 - C  | 6    | 0.35  | 10.48 | 0.077 |
| 97.  | CR | ( | 1) | C | 9  | /600. | BD* | ( | 1) | C | 8 - C  | 10   | 0.54  | 10.50 | 0.095 |
| 97.  | CR | ( | 1) | C | 9  | /602. | BD* | ( | 1) | C | 9 - C  | 10   | 0.45  | 10.68 | 0.088 |
| 98.  | CR | ( | 1) | C | 10 | /231. | RY* | ( | 3) | C | 8      | 0.42 | 11.32 | 0.088 |       |
| 98.  | CR | ( | 1) | C | 10 | /238. | RY* | ( | 2) | C | 9      | 0.25 | 11.11 | 0.067 |       |
| 98.  | CR | ( | 1) | C | 10 | /239. | RY* | ( | 3) | C | 9      | 0.56 | 11.10 | 0.100 |       |
| 98.  | CR | ( | 1) | C | 10 | /240. | RY* | ( | 4) | C | 9      | 0.58 | 11.14 | 0.102 |       |
| 98.  | CR | ( | 1) | C | 10 | /342. | RY* | ( | 2) | H | 25     | 0.33 | 12.33 | 0.081 |       |
| 98.  | CR | ( | 1) | C | 10 | /593. | BD* | ( | 1) | C | 4 - C  | 9    | 0.60  | 10.49 | 0.100 |
| 98.  | CR | ( | 1) | C | 10 | /597. | BD* | ( | 1) | C | 7 - C  | 8    | 0.32  | 10.67 | 0.074 |
| 98.  | CR | ( | 1) | C | 10 | /602. | BD* | ( | 1) | C | 9 - C  | 10   | 0.41  | 10.69 | 0.083 |
| 99.  | CR | ( | 1) | N | 11 | /213. | RY* | ( | 1) | C | 6      | 0.43 | 15.09 | 0.103 |       |
| 99.  | CR | ( | 1) | N | 11 | /214. | RY* | ( | 2) | C | 6      | 0.68 | 15.36 | 0.130 |       |
| 99.  | CR | ( | 1) | N | 11 | /263. | RY* | ( | 3) | N | 12     | 0.88 | 15.31 | 0.146 |       |
| 99.  | CR | ( | 1) | N | 11 | /591. | BD* | ( | 1) | C | 4 - C  | 6    | 0.27  | 14.66 | 0.080 |
| 99.  | CR | ( | 1) | N | 11 | /594. | BD* | ( | 1) | C | 5 - C  | 6    | 0.27  | 14.84 | 0.080 |
| 99.  | CR | ( | 1) | N | 11 | /607. | BD* | ( | 1) | N | 12 - C | 13   | 0.71  | 14.56 | 0.130 |
| 100. | CR | ( | 1) | N | 12 | /255. | RY* | ( | 3) | N | 11     | 0.99 | 15.51 | 0.157 |       |
| 100. | CR | ( | 1) | N | 12 | /269. | RY* | ( | 1) | C | 13     | 0.60 | 15.35 | 0.121 |       |
| 100. | CR | ( | 1) | N | 12 | /270. | RY* | ( | 2) | C | 13     | 0.43 | 15.68 | 0.104 |       |
| 100. | CR | ( | 1) | N | 12 | /596. | BD* | ( | 1) | C | 6 - N  | 11   | 0.62  | 14.62 | 0.122 |
| 100. | CR | ( | 1) | N | 12 | /609. | BD* | ( | 1) | C | 13 - C | 15   | 0.36  | 14.84 | 0.094 |
| 101. | CR | ( | 1) | C | 13 | /279. | RY* | ( | 3) | C | 14     | 0.44 | 11.36 | 0.090 |       |
| 101. | CR | ( | 1) | C | 13 | /285. | RY* | ( | 1) | C | 15     | 0.52 | 11.26 | 0.097 |       |
| 101. | CR | ( | 1) | C | 13 | /287. | RY* | ( | 3) | C | 15     | 0.99 | 11.41 | 0.134 |       |
| 101. | CR | ( | 1) | C | 13 | /606. | BD* | ( | 1) | N | 11 - N | 12   | 0.49  | 10.59 | 0.092 |
| 101. | CR | ( | 1) | C | 13 | /609. | BD* | ( | 1) | C | 13 - C | 15   | 0.58  | 10.70 | 0.101 |
| 101. | CR | ( | 1) | C | 13 | /611. | BD* | ( | 1) | C | 14 - C | 16   | 0.25  | 10.75 | 0.066 |
| 101. | CR | ( | 1) | C | 13 | /613. | BD* | ( | 1) | C | 15 - C | 17   | 0.47  | 10.55 | 0.090 |
| 101. | CR | ( | 1) | C | 13 | /614. | BD* | ( | 1) | C | 15 - O | 19   | 0.44  | 10.42 | 0.086 |
| 102. | CR | ( | 1) | C | 14 | /269. | RY* | ( | 1) | C | 13     | 0.39 | 11.12 | 0.083 |       |
| 102. | CR | ( | 1) | C | 14 | /271. | RY* | ( | 3) | C | 13     | 0.34 | 10.83 | 0.076 |       |
| 102. | CR | ( | 1) | C | 14 | /295. | RY* | ( | 3) | C | 16     | 1.02 | 11.37 | 0.136 |       |
| 102. | CR | ( | 1) | C | 14 | /344. | RY* | ( | 2) | H | 26     | 0.29 | 12.29 | 0.076 |       |
| 102. | CR | ( | 1) | C | 14 | /607. | BD* | ( | 1) | N | 12 - C | 13   | 0.26  | 10.38 | 0.066 |
| 102. | CR | ( | 1) | C | 14 | /609. | BD* | ( | 1) | C | 13 - C | 15   | 0.40  | 10.62 | 0.083 |
| 102. | CR | ( | 1) | C | 14 | /611. | BD* | ( | 1) | C | 14 - C | 16   | 0.42  | 10.67 | 0.085 |
| 102. | CR | ( | 1) | C | 14 | /615. | BD* | ( | 1) | C | 16 - C | 18   | 0.47  | 10.49 | 0.089 |

|                   |                            |       |       |       |
|-------------------|----------------------------|-------|-------|-------|
| 103. CR ( 1) C 15 | /270. RY* ( 2) C 13        | 1.47  | 11.54 | 0.164 |
| 103. CR ( 1) C 15 | /303. RY* ( 3) C 17        | 0.50  | 11.33 | 0.095 |
| 103. CR ( 1) C 15 | /607. BD* ( 1) N 12 - C 13 | 0.50  | 10.46 | 0.092 |
| 103. CR ( 1) C 15 | /608. BD* ( 1) C 13 - C 14 | 0.50  | 10.55 | 0.092 |
| 103. CR ( 1) C 15 | /609. BD* ( 1) C 13 - C 15 | 0.77  | 10.70 | 0.116 |
| 103. CR ( 1) C 15 | /614. BD* ( 1) C 15 - O 19 | 0.45  | 10.43 | 0.087 |
| 103. CR ( 1) C 15 | /617. BD* ( 1) C 17 - C 18 | 0.28  | 10.76 | 0.069 |
| 104. CR ( 1) C 16 | /278. RY* ( 2) C 14        | 0.31  | 11.34 | 0.075 |
| 104. CR ( 1) C 16 | /279. RY* ( 3) C 14        | 0.75  | 11.29 | 0.116 |
| 104. CR ( 1) C 16 | /280. RY* ( 4) C 14        | 0.28  | 10.94 | 0.070 |
| 104. CR ( 1) C 16 | /311. RY* ( 3) C 18        | 0.50  | 11.33 | 0.095 |
| 104. CR ( 1) C 16 | /346. RY* ( 2) H 27        | 0.31  | 11.97 | 0.077 |
| 104. CR ( 1) C 16 | /608. BD* ( 1) C 13 - C 14 | 0.51  | 10.48 | 0.093 |
| 104. CR ( 1) C 16 | /611. BD* ( 1) C 14 - C 16 | 0.34  | 10.68 | 0.077 |
| 104. CR ( 1) C 16 | /617. BD* ( 1) C 17 - C 18 | 0.30  | 10.69 | 0.072 |
| 105. CR ( 1) C 17 | /287. RY* ( 3) C 15        | 0.36  | 11.33 | 0.080 |
| 105. CR ( 1) C 17 | /288. RY* ( 4) C 15        | 0.51  | 11.06 | 0.095 |
| 105. CR ( 1) C 17 | /311. RY* ( 3) C 18        | 1.07  | 11.32 | 0.139 |
| 105. CR ( 1) C 17 | /348. RY* ( 2) H 28        | 0.29  | 12.30 | 0.076 |
| 105. CR ( 1) C 17 | /609. BD* ( 1) C 13 - C 15 | 0.42  | 10.62 | 0.085 |
| 105. CR ( 1) C 17 | /615. BD* ( 1) C 16 - C 18 | 0.51  | 10.49 | 0.093 |
| 105. CR ( 1) C 17 | /617. BD* ( 1) C 17 - C 18 | 0.47  | 10.68 | 0.089 |
| 106. CR ( 1) C 18 | /295. RY* ( 3) C 16        | 0.42  | 11.38 | 0.088 |
| 106. CR ( 1) C 18 | /302. RY* ( 2) C 17        | 0.43  | 11.36 | 0.089 |
| 106. CR ( 1) C 18 | /303. RY* ( 3) C 17        | 0.67  | 11.26 | 0.110 |
| 106. CR ( 1) C 18 | /350. RY* ( 2) H 29        | 0.32  | 11.98 | 0.078 |
| 106. CR ( 1) C 18 | /611. BD* ( 1) C 14 - C 16 | 0.28  | 10.68 | 0.070 |
| 106. CR ( 1) C 18 | /613. BD* ( 1) C 15 - C 17 | 0.49  | 10.48 | 0.091 |
| 106. CR ( 1) C 18 | /617. BD* ( 1) C 17 - C 18 | 0.35  | 10.69 | 0.077 |
| 107. CR ( 1) O 19 | /285. RY* ( 1) C 15        | 1.41  | 20.07 | 0.213 |
| 107. CR ( 1) O 19 | /609. BD* ( 1) C 13 - C 15 | 0.30  | 19.50 | 0.097 |
| 108. CR ( 1) O 20 | /173. RY* ( 1) C 1         | 0.85  | 19.94 | 0.165 |
| 108. CR ( 1) O 20 | /352. RY* ( 2) H 30        | 0.30  | 20.86 | 0.100 |
| 140. LP ( 1) N 11 | /261. RY* ( 1) N 12        | 0.75  | 1.15  | 0.038 |
| 140. LP ( 1) N 11 | /262. RY* ( 2) N 12        | 0.68  | 1.11  | 0.035 |
| 140. LP ( 1) N 11 | /591. BD* ( 1) C 4 - C 6   | 2.21  | 0.77  | 0.053 |
| 140. LP ( 1) N 11 | /592. BD* ( 2) C 4 - C 6   | 0.68  | 0.31  | 0.022 |
| 140. LP ( 1) N 11 | /594. BD* ( 1) C 5 - C 6   | 3.01  | 0.95  | 0.069 |
| 141. LP ( 2) N 11 | /213. RY* ( 1) C 6         | 0.72  | 1.33  | 0.040 |
| 141. LP ( 2) N 11 | /253. RY* ( 1) N 11        | 1.17  | 1.80  | 0.059 |
| 141. LP ( 2) N 11 | /254. RY* ( 2) N 11        | 0.87  | 1.85  | 0.052 |
| 141. LP ( 2) N 11 | /255. RY* ( 3) N 11        | 0.47  | 1.72  | 0.037 |
| 141. LP ( 2) N 11 | /262. RY* ( 2) N 12        | 0.52  | 1.23  | 0.033 |
| 141. LP ( 2) N 11 | /317. RY* ( 1) O 19        | 0.52  | 2.82  | 0.049 |
| 141. LP ( 2) N 11 | /591. BD* ( 1) C 4 - C 6   | 2.22  | 0.90  | 0.057 |
| 141. LP ( 2) N 11 | /592. BD* ( 2) C 4 - C 6   | 0.93  | 0.44  | 0.031 |
| 142. LP ( 1) N 12 | /254. RY* ( 2) N 11        | 0.46  | 1.85  | 0.037 |
| 142. LP ( 1) N 12 | /255. RY* ( 3) N 11        | 0.31  | 1.71  | 0.029 |
| 142. LP ( 1) N 12 | /269. RY* ( 1) C 13        | 0.88  | 1.54  | 0.047 |
| 142. LP ( 1) N 12 | /608. BD* ( 1) C 13 - C 14 | 0.56  | 0.89  | 0.028 |
| 142. LP ( 1) N 12 | /609. BD* ( 1) C 13 - C 15 | 3.64  | 1.04  | 0.078 |
| 143. LP ( 2) N 12 | /253. RY* ( 1) N 11        | 0.76  | 1.65  | 0.047 |
| 143. LP ( 2) N 12 | /271. RY* ( 3) C 13        | 0.30  | 1.11  | 0.024 |
| 143. LP ( 2) N 12 | /610. BD* ( 2) C 13 - C 15 | 15.99 | 0.32  | 0.097 |
| 144. LP ( 1) C 14 | /293. RY* ( 1) C 16        | 2.99  | 0.66  | 0.060 |
| 144. LP ( 1) C 14 | /610. BD* ( 2) C 13 - C 15 | 26.11 | 0.19  | 0.093 |
| 145. LP ( 1) C 18 | /293. RY* ( 1) C 16        | 1.05  | 0.60  | 0.043 |
| 145. LP ( 1) C 18 | /301. RY ( 1) C 17         | 2.06  | 0.61  | 0.062 |
| 145. LP ( 1) C 18 | /310. RY* ( 2) C 18        | 1.28  | 0.62  | 0.049 |
| 145. LP ( 1) C 18 | /610. BD* ( 2) C 13 - C 15 | 0.25  | 0.13  | 0.009 |
| 145. LP ( 1) C 18 | /615. BD* ( 1) C 16 - C 18 | 0.73  | 0.58  | 0.036 |
| 146. LP ( 1) O 19 | /285. RY* ( 1) C 15        | 1.13  | 1.72  | 0.056 |
| 146. LP ( 1) O 19 | /609. BD* ( 1) C 13 - C 15 | 3.53  | 1.15  | 0.081 |
| 147. LP ( 2) O 19 | /285. RY* ( 1) C 15        | 0.50  | 1.61  | 0.036 |
| 147. LP ( 2) O 19 | /317. RY* ( 1) O 19        | 0.55  | 2.82  | 0.051 |
| 147. LP ( 2) O 19 | /609. BD* ( 1) C 13 - C 15 | 0.27  | 1.04  | 0.021 |
| 147. LP ( 2) O 19 | /610. BD* ( 2) C 13 - C 15 | 1.48  | 0.47  | 0.037 |
| 147. LP ( 2) O 19 | /613. BD* ( 1) C 15 - C 17 | 3.17  | 0.89  | 0.068 |
| 148. LP ( 3) O 19 | /285. RY* ( 1) C 15        | 0.27  | 1.54  | 0.026 |
| 148. LP ( 3) O 19 | /317. RY* ( 1) O 19        | 0.50  | 2.75  | 0.048 |
| 148. LP ( 3) O 19 | /610. BD* ( 2) C 13 - C 15 | 6.86  | 0.40  | 0.073 |

|                           |                            |        |      |       |
|---------------------------|----------------------------|--------|------|-------|
| 148. LP ( 3) O 19         | /613. BD* ( 1) C 15 - C 17 | 0.81   | 0.82 | 0.033 |
| 149. LP ( 1) O 20         | /173. RY* ( 1) C 1         | 1.04   | 1.58 | 0.051 |
| 149. LP ( 1) O 20         | /174. RY* ( 2) C 1         | 0.33   | 1.34 | 0.027 |
| 149. LP ( 1) O 20         | /582. BD* ( 1) C 1 - C 2   | 3.15   | 1.03 | 0.072 |
| 150. LP ( 2) O 20         | /583. BD* ( 2) C 1 - C 2   | 4.52   | 0.32 | 0.060 |
| 583. BD* ( 2) C 1 - C 2   | /174. RY* ( 2) C 1         | 0.39   | 0.75 | 0.036 |
| 583. BD* ( 2) C 1 - C 2   | /183. RY* ( 3) C 2         | 0.30   | 0.95 | 0.035 |
| 583. BD* ( 2) C 1 - C 2   | /184. RY* ( 4) C 2         | 1.26   | 0.75 | 0.064 |
| 583. BD* ( 2) C 1 - C 2   | /189. RY* ( 1) C 3         | 0.44   | 0.53 | 0.031 |
| 583. BD* ( 2) C 1 - C 2   | /199. RY* ( 3) C 4         | 0.41   | 0.64 | 0.034 |
| 583. BD* ( 2) C 1 - C 2   | /221. RY* ( 1) C 7         | 0.39   | 0.61 | 0.032 |
| 583. BD* ( 2) C 1 - C 2   | /592. BD* ( 2) C 4 - C 6   | 720.14 | 0.01 | 0.129 |
| 583. BD* ( 2) C 1 - C 2   | /598. BD* ( 2) C 7 - C 8   | 47.20  | 0.05 | 0.077 |
| 583. BD* ( 2) C 1 - C 2   | /603. BD* ( 2) C 9 - C 10  | 0.26   | 0.06 | 0.006 |
| 589. BD* ( 2) C 3 - C 5   | /189. RY* ( 1) C 3         | 0.81   | 0.52 | 0.052 |
| 589. BD* ( 2) C 3 - C 5   | /205. RY* ( 1) C 5         | 0.78   | 0.56 | 0.053 |
| 592. BD* ( 2) C 4 - C 6   | /184. RY* ( 4) C 2         | 0.46   | 0.74 | 0.038 |
| 592. BD* ( 2) C 4 - C 6   | /199. RY* ( 3) C 4         | 3.31   | 0.63 | 0.094 |
| 592. BD* ( 2) C 4 - C 6   | /205. RY* ( 1) C 5         | 0.45   | 0.56 | 0.032 |
| 592. BD* ( 2) C 4 - C 6   | /213. RY* ( 1) C 6         | 0.37   | 0.90 | 0.037 |
| 592. BD* ( 2) C 4 - C 6   | /237. RY* ( 1) C 9         | 0.44   | 0.74 | 0.037 |
| 592. BD* ( 2) C 4 - C 6   | /598. BD* ( 2) C 7 - C 8   | 0.32   | 0.04 | 0.006 |
| 592. BD* ( 2) C 4 - C 6   | /603. BD* ( 2) C 9 - C 10  | 58.19  | 0.05 | 0.083 |
| 592. BD* ( 2) C 4 - C 6   | /606. BD* ( 1) N 11 - N 12 | 0.86   | 0.50 | 0.042 |
| 598. BD* ( 2) C 7 - C 8   | /221. RY* ( 1) C 7         | 1.39   | 0.56 | 0.067 |
| 598. BD* ( 2) C 7 - C 8   | /230. RY* ( 2) C 8         | 2.38   | 0.48 | 0.081 |
| 603. BD* ( 2) C 9 - C 10  | /237. RY* ( 1) C 9         | 1.14   | 0.70 | 0.068 |
| 603. BD* ( 2) C 9 - C 10  | /246. RY* ( 2) C 10        | 2.18   | 0.51 | 0.080 |
| 610. BD* ( 2) C 13 - C 15 | /272. RY* ( 4) C 13        | 0.65   | 0.68 | 0.058 |
| 610. BD* ( 2) C 13 - C 15 | /277. RY ( 1) C 14         | 0.37   | 0.47 | 0.035 |
| 610. BD* ( 2) C 13 - C 15 | /287. RY* ( 3) C 15        | 0.38   | 1.29 | 0.060 |
| 610. BD* ( 2) C 13 - C 15 | /301. RY ( 1) C 17         | 0.27   | 0.48 | 0.031 |
| 610. BD* ( 2) C 13 - C 15 | /609. BD* ( 1) C 13 - C 15 | 1.58   | 0.57 | 0.078 |

from unit 1 to unit 2

|                          |                            |      |      |       |
|--------------------------|----------------------------|------|------|-------|
| 21. BD ( 1) C 9 - C 10   | /521. RY* ( 1) H 58        | 0.06 | 1.27 | 0.011 |
| 22. BD ( 2) C 9 - C 10   | /657. BD* ( 1) C 48 - H 58 | 0.09 | 0.72 | 0.011 |
| 33. BD ( 1) C 15 - O 19  | /435. RY* ( 1) N 42        | 0.03 | 2.73 | 0.012 |
| 33. BD ( 1) C 15 - O 19  | /451. RY* ( 1) C 44        | 0.05 | 1.96 | 0.012 |
| 33. BD ( 1) C 15 - O 19  | /468. RY* ( 2) C 46        | 0.03 | 2.29 | 0.010 |
| 34. BD* ( 1) C 16 - C 17 | /527. RY* ( 1) H 61        | 0.03 | 0.66 | 0.005 |
| 140. LP ( 1) N 11        | /435. RY* ( 1) N 42        | 0.04 | 2.21 | 0.013 |
| 140. LP ( 1) N 11        | /437. RY* ( 3) N 42        | 0.04 | 1.54 | 0.011 |
| 140. LP ( 1) N 11        | /541. RY* ( 1) O 65        | 0.07 | 2.71 | 0.018 |
| 140. LP ( 1) N 11        | /652. BD* ( 1) C 46 - O 65 | 0.12 | 0.65 | 0.011 |
| 141. LP ( 2) N 11        | /396. RY* ( 2) C 37        | 0.13 | 1.54 | 0.019 |
| 141. LP ( 2) N 11        | /398. RY* ( 4) C 37        | 0.03 | 1.49 | 0.009 |
| 141. LP ( 2) N 11        | /400. RY* ( 6) C 37        | 0.05 | 3.58 | 0.018 |
| 141. LP ( 2) N 11        | /435. RY* ( 1) N 42        | 0.30 | 2.34 | 0.034 |
| 141. LP ( 2) N 11        | /436. RY* ( 2) N 42        | 0.07 | 1.39 | 0.013 |
| 141. LP ( 2) N 11        | /437. RY* ( 3) N 42        | 0.16 | 1.67 | 0.021 |
| 141. LP ( 2) N 11        | /438. RY* ( 4) N 42        | 0.06 | 1.94 | 0.014 |
| 141. LP ( 2) N 11        | /445. RY* ( 3) N 43        | 0.04 | 1.54 | 0.010 |
| 141. LP ( 2) N 11        | /467. RY* ( 1) C 46        | 0.15 | 1.61 | 0.020 |
| 141. LP ( 2) N 11        | /468. RY* ( 2) C 46        | 0.03 | 1.90 | 0.010 |
| 141. LP ( 2) N 11        | /470. RY* ( 4) C 46        | 0.03 | 1.21 | 0.007 |
| 141. LP ( 2) N 11        | /471. RY* ( 5) C 46        | 0.03 | 5.29 | 0.017 |
| 141. LP ( 2) N 11        | /541. RY* ( 1) O 65        | 0.45 | 2.83 | 0.046 |
| 141. LP ( 2) N 11        | /543. RY* ( 3) O 65        | 0.09 | 1.85 | 0.017 |
| 141. LP ( 2) N 11        | /544. RY* ( 4) O 65        | 0.07 | 2.13 | 0.015 |
| 141. LP ( 2) N 11        | /652. BD* ( 1) C 46 - O 65 | 0.03 | 0.77 | 0.006 |
| 146. LP ( 1) O 19        | /396. RY* ( 2) C 37        | 0.03 | 1.65 | 0.009 |
| 146. LP ( 1) O 19        | /435. RY* ( 1) N 42        | 0.14 | 2.45 | 0.023 |
| 146. LP ( 1) O 19        | /436. RY* ( 2) N 42        | 0.03 | 1.50 | 0.008 |
| 146. LP ( 1) O 19        | /437. RY* ( 3) N 42        | 0.10 | 1.78 | 0.017 |
| 146. LP ( 1) O 19        | /446. RY* ( 4) N 43        | 0.03 | 2.16 | 0.010 |
| 146. LP ( 1) O 19        | /467. RY* ( 1) C 46        | 0.03 | 1.72 | 0.009 |
| 146. LP ( 1) O 19        | /541. RY* ( 1) O 65        | 0.08 | 2.94 | 0.020 |
| 146. LP ( 1) O 19        | /633. BD* ( 1) C 37 - N 42 | 0.03 | 0.93 | 0.006 |
| 146. LP ( 1) O 19        | /644. BD* ( 1) N 43 - C 44 | 0.04 | 0.93 | 0.008 |
| 146. LP ( 1) O 19        | /652. BD* ( 1) C 46 - O 65 | 0.03 | 0.88 | 0.007 |

|                   |                            |      |      |       |
|-------------------|----------------------------|------|------|-------|
| 147. LP ( 2) O 19 | /396. RY* ( 2) C 37        | 0.09 | 1.53 | 0.015 |
| 147. LP ( 2) O 19 | /400. RY* ( 6) C 37        | 0.03 | 3.58 | 0.012 |
| 147. LP ( 2) O 19 | /435. RY* ( 1) N 42        | 0.24 | 2.34 | 0.030 |
| 147. LP ( 2) O 19 | /437. RY* ( 3) N 42        | 0.10 | 1.67 | 0.017 |
| 147. LP ( 2) O 19 | /467. RY* ( 1) C 46        | 0.09 | 1.60 | 0.016 |
| 147. LP ( 2) O 19 | /468. RY* ( 2) C 46        | 0.04 | 1.89 | 0.011 |
| 147. LP ( 2) O 19 | /541. RY* ( 1) O 65        | 0.16 | 2.83 | 0.027 |
| 147. LP ( 2) O 19 | /544. RY* ( 4) O 65        | 0.05 | 2.13 | 0.013 |
| 147. LP ( 2) O 19 | /647. BD* ( 2) C 44 - C 46 | 0.12 | 0.46 | 0.010 |
| 147. LP ( 2) O 19 | /652. BD* ( 1) C 46 - O 65 | 0.19 | 0.77 | 0.015 |
| 148. LP ( 3) O 19 | /396. RY* ( 2) C 37        | 0.06 | 1.47 | 0.012 |
| 148. LP ( 3) O 19 | /435. RY* ( 1) N 42        | 0.27 | 2.27 | 0.032 |
| 148. LP ( 3) O 19 | /436. RY* ( 2) N 42        | 0.03 | 1.32 | 0.007 |
| 148. LP ( 3) O 19 | /437. RY* ( 3) N 42        | 0.09 | 1.60 | 0.015 |
| 148. LP ( 3) O 19 | /438. RY* ( 4) N 42        | 0.08 | 1.87 | 0.016 |
| 148. LP ( 3) O 19 | /467. RY* ( 1) C 46        | 0.06 | 1.53 | 0.012 |
| 148. LP ( 3) O 19 | /541. RY* ( 1) O 65        | 0.14 | 2.76 | 0.025 |
| 148. LP ( 3) O 19 | /633. BD* ( 1) C 37 - N 42 | 0.08 | 0.75 | 0.010 |

from unit 1 to unit 3

|                           |                            |      |      |       |
|---------------------------|----------------------------|------|------|-------|
| 26. BD ( 1) N 12 - C 13   | /529. RY* ( 1) O 62        | 0.04 | 2.82 | 0.013 |
| 26. BD ( 1) N 12 - C 13   | /537. RY* ( 1) H 63        | 0.04 | 1.35 | 0.009 |
| 28. BD ( 1) C 13 - C 15   | /539. RY* ( 1) H 64        | 0.04 | 1.32 | 0.009 |
| 29. BD ( 2) C 13 - C 15   | /661. BD* ( 1) O 62 - H 64 | 0.19 | 0.64 | 0.014 |
| 32. BD ( 1) C 15 - C 17   | /529. RY* ( 1) O 62        | 0.04 | 2.67 | 0.013 |
| 32. BD ( 1) C 15 - C 17   | /539. RY* ( 1) H 64        | 0.05 | 1.21 | 0.010 |
| 140. LP ( 1) N 11         | /529. RY* ( 1) O 62        | 0.12 | 2.35 | 0.022 |
| 140. LP ( 1) N 11         | /532. RY* ( 4) O 62        | 0.04 | 1.68 | 0.011 |
| 140. LP ( 1) N 11         | /537. RY* ( 1) H 63        | 0.06 | 0.87 | 0.009 |
| 140. LP ( 1) N 11         | /539. RY* ( 1) H 64        | 0.03 | 0.88 | 0.007 |
| 140. LP ( 1) N 11         | /660. BD* ( 1) O 62 - H 63 | 0.15 | 0.65 | 0.013 |
| 141. LP ( 2) N 11         | /529. RY* ( 1) O 62        | 0.85 | 2.47 | 0.059 |
| 141. LP ( 2) N 11         | /531. RY* ( 3) O 62        | 0.17 | 1.80 | 0.022 |
| 141. LP ( 2) N 11         | /532. RY* ( 4) O 62        | 0.27 | 1.81 | 0.029 |
| 141. LP ( 2) N 11         | /537. RY* ( 1) H 63        | 0.26 | 1.00 | 0.021 |
| 141. LP ( 2) N 11         | /539. RY* ( 1) H 64        | 0.23 | 1.01 | 0.020 |
| 146. LP ( 1) O 19         | /529. RY* ( 1) O 62        | 0.19 | 2.58 | 0.028 |
| 146. LP ( 1) O 19         | /531. RY* ( 3) O 62        | 0.03 | 1.91 | 0.010 |
| 146. LP ( 1) O 19         | /532. RY* ( 4) O 62        | 0.04 | 1.92 | 0.012 |
| 146. LP ( 1) O 19         | /537. RY* ( 1) H 63        | 0.07 | 1.11 | 0.011 |
| 146. LP ( 1) O 19         | /539. RY* ( 1) H 64        | 0.05 | 1.12 | 0.009 |
| 146. LP ( 1) O 19         | /661. BD* ( 1) O 62 - H 64 | 0.03 | 0.89 | 0.006 |
| 147. LP ( 2) O 19         | /529. RY* ( 1) O 62        | 0.47 | 2.47 | 0.043 |
| 147. LP ( 2) O 19         | /531. RY* ( 3) O 62        | 0.08 | 1.80 | 0.015 |
| 147. LP ( 2) O 19         | /532. RY* ( 4) O 62        | 0.13 | 1.80 | 0.020 |
| 147. LP ( 2) O 19         | /537. RY* ( 1) H 63        | 0.11 | 1.00 | 0.013 |
| 147. LP ( 2) O 19         | /539. RY* ( 1) H 64        | 0.16 | 1.01 | 0.016 |
| 147. LP ( 2) O 19         | /660. BD* ( 1) O 62 - H 63 | 0.03 | 0.77 | 0.006 |
| 147. LP ( 2) O 19         | /661. BD* ( 1) O 62 - H 64 | 0.09 | 0.78 | 0.011 |
| 148. LP ( 3) O 19         | /529. RY* ( 1) O 62        | 0.28 | 2.40 | 0.033 |
| 148. LP ( 3) O 19         | /531. RY* ( 3) O 62        | 0.07 | 1.73 | 0.014 |
| 148. LP ( 3) O 19         | /532. RY* ( 4) O 62        | 0.11 | 1.73 | 0.018 |
| 148. LP ( 3) O 19         | /537. RY* ( 1) H 63        | 0.07 | 0.93 | 0.010 |
| 148. LP ( 3) O 19         | /539. RY* ( 1) H 64        | 0.06 | 0.94 | 0.010 |
| 301. RY ( 1) C 17         | /539. RY* ( 1) H 64        | 0.29 | 0.06 | 0.050 |
| 610. BD* ( 2) C 13 - C 15 | /661. BD* ( 1) O 62 - H 64 | 0.08 | 0.30 | 0.013 |

from unit 1 to unit 4

|                         |                            |      |      |       |
|-------------------------|----------------------------|------|------|-------|
| 11. BD ( 2) C 4 - C 6   | /663. BD* ( 1) H 67 - O 68 | 0.04 | 0.59 | 0.006 |
| 13. BD ( 1) C 5 - C 6   | /555. RY* ( 3) O 68        | 0.06 | 1.82 | 0.014 |
| 25. BD ( 1) N 11 - N 12 | /553. RY* ( 1) O 68        | 0.04 | 2.91 | 0.013 |
| 26. BD ( 1) N 12 - C 13 | /553. RY* ( 1) O 68        | 0.04 | 2.72 | 0.013 |
| 140. LP ( 1) N 11       | /549. RY* ( 1) H 66        | 0.04 | 1.01 | 0.008 |
| 140. LP ( 1) N 11       | /551. RY* ( 1) H 67        | 0.06 | 0.95 | 0.009 |
| 140. LP ( 1) N 11       | /553. RY* ( 1) O 68        | 0.11 | 2.25 | 0.021 |
| 140. LP ( 1) N 11       | /556. RY* ( 4) O 68        | 0.05 | 2.12 | 0.013 |
| 141. LP ( 2) N 11       | /549. RY* ( 1) H 66        | 0.36 | 1.14 | 0.026 |
| 141. LP ( 2) N 11       | /551. RY* ( 1) H 67        | 0.36 | 1.07 | 0.025 |
| 141. LP ( 2) N 11       | /553. RY* ( 1) O 68        | 0.84 | 2.37 | 0.058 |
| 141. LP ( 2) N 11       | /555. RY* ( 3) O 68        | 0.04 | 1.51 | 0.009 |
| 141. LP ( 2) N 11       | /556. RY* ( 4) O 68        | 0.28 | 2.25 | 0.033 |

|                         |                            |      |        |       |
|-------------------------|----------------------------|------|--------|-------|
| 146. LP ( 1) O 19       | /549. RY* ( 1) H 66        | 0.07 | 1.25   | 0.012 |
| 146. LP ( 1) O 19       | /551. RY* ( 1) H 67        | 0.07 | 1.18   | 0.012 |
| 146. LP ( 1) O 19       | /553. RY* ( 1) O 68        | 0.12 | 2.48   | 0.022 |
| 146. LP ( 1) O 19       | /556. RY* ( 4) O 68        | 0.05 | 2.36   | 0.014 |
| 147. LP ( 2) O 19       | /549. RY* ( 1) H 66        | 0.12 | 1.14   | 0.015 |
| 147. LP ( 2) O 19       | /551. RY* ( 1) H 67        | 0.16 | 1.07   | 0.017 |
| 147. LP ( 2) O 19       | /553. RY* ( 1) O 68        | 0.31 | 2.37   | 0.035 |
| 147. LP ( 2) O 19       | /556. RY* ( 4) O 68        | 0.17 | 2.25   | 0.025 |
| 148. LP ( 3) O 19       | /549. RY* ( 1) H 66        | 0.08 | 1.07   | 0.012 |
| 148. LP ( 3) O 19       | /551. RY* ( 1) H 67        | 0.09 | 1.00   | 0.012 |
| 148. LP ( 3) O 19       | /553. RY* ( 1) O 68        | 0.20 | 2.30   | 0.028 |
| 148. LP ( 3) O 19       | /556. RY* ( 4) O 68        | 0.13 | 2.18   | 0.021 |
| 148. LP ( 3) O 19       | /663. BD* ( 1) H 67 - O 68 | 0.03 | 0.71   | 0.006 |
| from unit 1 to unit 5   |                            |      |        |       |
| 10. BD ( 1) C 4 - C 6   | /166. LP ( 6)Mn 69         | 0.05 | 1.41   | 0.011 |
| 10. BD ( 1) C 4 - C 6   | /167. LP* ( 7)Mn 69        | 0.05 | 1.19   | 0.010 |
| 11. BD ( 2) C 4 - C 6   | /561. RY* ( 1)Mn 69        | 0.04 | 2.05   | 0.013 |
| 13. BD ( 1) C 5 - C 6   | /167. LP* ( 7)Mn 69        | 0.05 | 1.30   | 0.010 |
| 15. BD ( 1) C 6 - N 11  | /166. LP ( 6)Mn 69         | 0.73 | 1.56   | 0.045 |
| 15. BD ( 1) C 6 - N 11  | /167. LP* ( 7)Mn 69        | 0.04 | 1.33   | 0.009 |
| 15. BD ( 1) C 6 - N 11  | /168. LP* ( 8)Mn 69        | 0.09 | 2.62   | 0.019 |
| 15. BD ( 1) C 6 - N 11  | /169. LP* ( 9)Mn 69        | 0.03 | 2.54   | 0.011 |
| 15. BD ( 1) C 6 - N 11  | /564. RY* ( 4)Mn 69        | 0.05 | 2.98   | 0.016 |
| 15. BD ( 1) C 6 - N 11  | /565. RY* ( 5)Mn 69        | 0.05 | 2.60   | 0.014 |
| 15. BD ( 1) C 6 - N 11  | /567. RY* ( 7)Mn 69        | 0.03 | 2.80   | 0.012 |
| 15. BD ( 1) C 6 - N 11  | /569. RY* ( 9)Mn 69        | 0.04 | 8.82   | 0.023 |
| 15. BD ( 1) C 6 - N 11  | /572. RY* ( 12)Mn 69       | 0.03 | 5.97   | 0.016 |
| 25. BD ( 1) N 11 - N 12 | /166. LP ( 6)Mn 69         | 0.79 | 1.75   | 0.050 |
| 25. BD ( 1) N 11 - N 12 | /167. LP* ( 7)Mn 69        | 0.05 | 1.53   | 0.011 |
| 25. BD ( 1) N 11 - N 12 | /168. LP* ( 8)Mn 69        | 0.03 | 2.82   | 0.011 |
| 25. BD ( 1) N 11 - N 12 | /169. LP* ( 9)Mn 69        | 0.09 | 2.73   | 0.020 |
| 25. BD ( 1) N 11 - N 12 | /561. RY* ( 1)Mn 69        | 0.06 | 2.78   | 0.016 |
| 25. BD ( 1) N 11 - N 12 | /562. RY* ( 2)Mn 69        | 0.19 | 3.98   | 0.034 |
| 25. BD ( 1) N 11 - N 12 | /569. RY* ( 9)Mn 69        | 0.06 | 9.02   | 0.030 |
| 25. BD ( 1) N 11 - N 12 | /580. RY* ( 20)Mn 69       | 0.03 | 149.96 | 0.090 |
| 25. BD ( 1) N 11 - N 12 | /581. RY* ( 21)Mn 69       | 0.06 | 39.36  | 0.059 |
| 26. BD ( 1) N 12 - C 13 | /166. LP ( 6)Mn 69         | 0.11 | 1.56   | 0.018 |
| 26. BD ( 1) N 12 - C 13 | /167. LP* ( 7)Mn 69        | 0.04 | 1.34   | 0.010 |
| 26. BD ( 1) N 12 - C 13 | /561. RY* ( 1)Mn 69        | 0.04 | 2.59   | 0.012 |
| 26. BD ( 1) N 12 - C 13 | /562. RY* ( 2)Mn 69        | 0.08 | 3.78   | 0.022 |
| 26. BD ( 1) N 12 - C 13 | /568. RY* ( 8)Mn 69        | 0.04 | 7.48   | 0.023 |
| 26. BD ( 1) N 12 - C 13 | /570. RY* ( 10)Mn 69       | 0.05 | 9.56   | 0.029 |
| 26. BD ( 1) N 12 - C 13 | /577. RY* ( 17)Mn 69       | 0.03 | 28.06  | 0.034 |
| 26. BD ( 1) N 12 - C 13 | /578. RY* ( 18)Mn 69       | 0.03 | 679.52 | 0.195 |
| 26. BD ( 1) N 12 - C 13 | /580. RY* ( 20)Mn 69       | 0.07 | 149.76 | 0.126 |
| 26. BD ( 1) N 12 - C 13 | /581. RY* ( 21)Mn 69       | 0.12 | 39.17  | 0.088 |
| 27. BD ( 1) C 13 - C 14 | /166. LP ( 6)Mn 69         | 0.03 | 1.41   | 0.009 |
| 28. BD ( 1) C 13 - C 15 | /166. LP ( 6)Mn 69         | 0.14 | 1.53   | 0.019 |
| 28. BD ( 1) C 13 - C 15 | /167. LP* ( 7)Mn 69        | 0.07 | 1.30   | 0.012 |
| 28. BD ( 1) C 13 - C 15 | /562. RY* ( 2)Mn 69        | 0.03 | 3.75   | 0.014 |
| 28. BD ( 1) C 13 - C 15 | /581. RY* ( 21)Mn 69       | 0.04 | 39.14  | 0.047 |
| 29. BD ( 2) C 13 - C 15 | /166. LP ( 6)Mn 69         | 0.03 | 1.07   | 0.008 |
| 32. BD ( 1) C 15 - C 17 | /166. LP ( 6)Mn 69         | 0.20 | 1.41   | 0.023 |
| 32. BD ( 1) C 15 - C 17 | /167. LP* ( 7)Mn 69        | 0.05 | 1.18   | 0.009 |
| 32. BD ( 1) C 15 - C 17 | /562. RY* ( 2)Mn 69        | 0.05 | 3.63   | 0.016 |
| 32. BD ( 1) C 15 - C 17 | /581. RY* ( 21)Mn 69       | 0.04 | 39.02  | 0.050 |
| 33. BD ( 1) C 15 - O 19 | /166. LP ( 6)Mn 69         | 0.55 | 1.61   | 0.040 |
| 33. BD ( 1) C 15 - O 19 | /168. LP* ( 8)Mn 69        | 0.11 | 2.67   | 0.021 |
| 33. BD ( 1) C 15 - O 19 | /169. LP* ( 9)Mn 69        | 0.08 | 2.59   | 0.018 |
| 33. BD ( 1) C 15 - O 19 | /569. RY* ( 9)Mn 69        | 0.03 | 8.87   | 0.021 |
| 33. BD ( 1) C 15 - O 19 | /573. RY* ( 13)Mn 69       | 0.03 | 8.54   | 0.020 |
| 94. CR ( 1) C 6         | /166. LP ( 6)Mn 69         | 0.03 | 10.85  | 0.024 |
| 99. CR ( 1) N 11        | /166. LP ( 6)Mn 69         | 1.01 | 14.97  | 0.166 |
| 100. CR ( 1) N 12       | /166. LP ( 6)Mn 69         | 0.03 | 15.01  | 0.030 |
| 103. CR ( 1) C 15       | /166. LP ( 6)Mn 69         | 0.04 | 10.87  | 0.029 |
| 107. CR ( 1) O 19       | /166. LP ( 6)Mn 69         | 1.20 | 19.67  | 0.208 |
| 140. LP ( 1) N 11       | /166. LP ( 6)Mn 69         | 2.54 | 1.09   | 0.070 |
| 140. LP ( 1) N 11       | /167. LP* ( 7)Mn 69        | 0.08 | 0.86   | 0.010 |
| 140. LP ( 1) N 11       | /561. RY* ( 1)Mn 69        | 0.06 | 2.11   | 0.015 |
| 140. LP ( 1) N 11       | /562. RY* ( 2)Mn 69        | 0.35 | 3.31   | 0.044 |

|                   |                       |       |        |       |
|-------------------|-----------------------|-------|--------|-------|
| 140. LP ( 1) N 11 | /565. RY* ( 5) Mn 69  | 0.04  | 2.13   | 0.012 |
| 140. LP ( 1) N 11 | /567. RY* ( 7) Mn 69  | 0.04  | 2.33   | 0.012 |
| 140. LP ( 1) N 11 | /575. RY* ( 15) Mn 69 | 0.05  | 5.88   | 0.022 |
| 140. LP ( 1) N 11 | /578. RY* ( 18) Mn 69 | 0.08  | 679.05 | 0.294 |
| 140. LP ( 1) N 11 | /580. RY* ( 20) Mn 69 | 0.15  | 149.29 | 0.195 |
| 140. LP ( 1) N 11 | /581. RY* ( 21) Mn 69 | 0.28  | 38.70  | 0.134 |
| 141. LP ( 2) N 11 | /166. LP ( 6) Mn 69   | 16.68 | 1.21   | 0.188 |
| 141. LP ( 2) N 11 | /167. LP* ( 7) Mn 69  | 0.23  | 0.99   | 0.020 |
| 141. LP ( 2) N 11 | /168. LP* ( 8) Mn 69  | 0.25  | 2.28   | 0.031 |
| 141. LP ( 2) N 11 | /169. LP* ( 9) Mn 69  | 0.04  | 2.19   | 0.011 |
| 141. LP ( 2) N 11 | /561. RY* ( 1) Mn 69  | 0.54  | 2.24   | 0.045 |
| 141. LP ( 2) N 11 | /562. RY* ( 2) Mn 69  | 2.43  | 3.44   | 0.118 |
| 141. LP ( 2) N 11 | /564. RY* ( 4) Mn 69  | 0.11  | 2.64   | 0.022 |
| 141. LP ( 2) N 11 | /565. RY* ( 5) Mn 69  | 0.17  | 2.26   | 0.025 |
| 141. LP ( 2) N 11 | /567. RY* ( 7) Mn 69  | 0.28  | 2.46   | 0.034 |
| 141. LP ( 2) N 11 | /568. RY* ( 8) Mn 69  | 0.07  | 7.13   | 0.028 |
| 141. LP ( 2) N 11 | /574. RY* ( 14) Mn 69 | 0.05  | 6.37   | 0.022 |
| 141. LP ( 2) N 11 | /575. RY* ( 15) Mn 69 | 0.20  | 6.00   | 0.045 |
| 141. LP ( 2) N 11 | /578. RY* ( 18) Mn 69 | 0.56  | 679.18 | 0.796 |
| 141. LP ( 2) N 11 | /580. RY* ( 20) Mn 69 | 1.11  | 149.42 | 0.528 |
| 141. LP ( 2) N 11 | /581. RY* ( 21) Mn 69 | 2.07  | 38.82  | 0.367 |
| 142. LP ( 1) N 12 | /166. LP ( 6) Mn 69   | 0.16  | 1.20   | 0.019 |
| 142. LP ( 1) N 12 | /561. RY* ( 1) Mn 69  | 0.08  | 2.23   | 0.017 |
| 146. LP ( 1) O 19 | /166. LP ( 6) Mn 69   | 4.01  | 1.32   | 0.098 |
| 146. LP ( 1) O 19 | /167. LP* ( 7) Mn 69  | 0.08  | 1.10   | 0.012 |
| 146. LP ( 1) O 19 | /169. LP* ( 9) Mn 69  | 0.06  | 2.30   | 0.015 |
| 146. LP ( 1) O 19 | /561. RY* ( 1) Mn 69  | 0.05  | 2.35   | 0.013 |
| 146. LP ( 1) O 19 | /562. RY* ( 2) Mn 69  | 0.54  | 3.55   | 0.056 |
| 146. LP ( 1) O 19 | /563. RY* ( 3) Mn 69  | 0.05  | 2.32   | 0.014 |
| 146. LP ( 1) O 19 | /564. RY* ( 4) Mn 69  | 0.04  | 2.75   | 0.013 |
| 146. LP ( 1) O 19 | /567. RY* ( 7) Mn 69  | 0.07  | 2.57   | 0.017 |
| 146. LP ( 1) O 19 | /569. RY* ( 9) Mn 69  | 0.03  | 8.59   | 0.020 |
| 146. LP ( 1) O 19 | /575. RY* ( 15) Mn 69 | 0.06  | 6.11   | 0.024 |
| 146. LP ( 1) O 19 | /578. RY* ( 18) Mn 69 | 0.12  | 679.28 | 0.368 |
| 146. LP ( 1) O 19 | /580. RY* ( 20) Mn 69 | 0.21  | 149.52 | 0.225 |
| 146. LP ( 1) O 19 | /581. RY* ( 21) Mn 69 | 0.38  | 38.93  | 0.154 |
| 147. LP ( 2) O 19 | /166. LP ( 6) Mn 69   | 9.25  | 1.21   | 0.141 |
| 147. LP ( 2) O 19 | /167. LP* ( 7) Mn 69  | 0.66  | 0.99   | 0.033 |
| 147. LP ( 2) O 19 | /168. LP* ( 8) Mn 69  | 0.08  | 2.27   | 0.017 |
| 147. LP ( 2) O 19 | /169. LP* ( 9) Mn 69  | 0.32  | 2.19   | 0.034 |
| 147. LP ( 2) O 19 | /562. RY* ( 2) Mn 69  | 1.08  | 3.43   | 0.078 |
| 147. LP ( 2) O 19 | /563. RY* ( 3) Mn 69  | 0.05  | 2.21   | 0.014 |
| 147. LP ( 2) O 19 | /564. RY* ( 4) Mn 69  | 0.05  | 2.64   | 0.014 |
| 147. LP ( 2) O 19 | /567. RY* ( 7) Mn 69  | 0.22  | 2.46   | 0.030 |
| 147. LP ( 2) O 19 | /575. RY* ( 15) Mn 69 | 0.12  | 6.00   | 0.035 |
| 147. LP ( 2) O 19 | /578. RY* ( 18) Mn 69 | 0.28  | 679.17 | 0.560 |
| 147. LP ( 2) O 19 | /580. RY* ( 20) Mn 69 | 0.54  | 149.41 | 0.365 |
| 147. LP ( 2) O 19 | /581. RY* ( 21) Mn 69 | 1.02  | 38.82  | 0.255 |
| 148. LP ( 3) O 19 | /166. LP ( 6) Mn 69   | 8.27  | 1.14   | 0.128 |
| 148. LP ( 3) O 19 | /167. LP* ( 7) Mn 69  | 0.61  | 0.92   | 0.030 |
| 148. LP ( 3) O 19 | /168. LP* ( 8) Mn 69  | 0.15  | 2.20   | 0.023 |
| 148. LP ( 3) O 19 | /169. LP* ( 9) Mn 69  | 0.24  | 2.12   | 0.029 |
| 148. LP ( 3) O 19 | /561. RY* ( 1) Mn 69  | 0.13  | 2.17   | 0.022 |
| 148. LP ( 3) O 19 | /562. RY* ( 2) Mn 69  | 0.81  | 3.36   | 0.068 |
| 148. LP ( 3) O 19 | /563. RY* ( 3) Mn 69  | 0.03  | 2.14   | 0.010 |
| 148. LP ( 3) O 19 | /564. RY* ( 4) Mn 69  | 0.03  | 2.57   | 0.012 |
| 148. LP ( 3) O 19 | /567. RY* ( 7) Mn 69  | 0.16  | 2.39   | 0.025 |
| 148. LP ( 3) O 19 | /575. RY* ( 15) Mn 69 | 0.09  | 5.93   | 0.030 |
| 148. LP ( 3) O 19 | /578. RY* ( 18) Mn 69 | 0.20  | 679.10 | 0.480 |
| 148. LP ( 3) O 19 | /580. RY* ( 20) Mn 69 | 0.41  | 149.34 | 0.319 |
| 148. LP ( 3) O 19 | /581. RY* ( 21) Mn 69 | 0.77  | 38.75  | 0.224 |
| 277. RY ( 1) C 14 | /166. LP ( 6) Mn 69   | 0.05  | 0.27   | 0.012 |
| 277. RY ( 1) C 14 | /167. LP* ( 7) Mn 69  | 0.03  | 0.05   | 0.014 |
| 301. RY ( 1) C 17 | /166. LP ( 6) Mn 69   | 0.27  | 0.26   | 0.029 |
| 301. RY ( 1) C 17 | /167. LP* ( 7) Mn 69  | 0.10  | 0.04   | 0.022 |

from unit 2 to unit 1

|                         |                            |      |      |       |
|-------------------------|----------------------------|------|------|-------|
| 71. BD ( 1) C 44 - C 46 | /319. RY* ( 3) O 19        | 0.09 | 2.10 | 0.017 |
| 72. BD ( 2) C 44 - C 46 | /319. RY* ( 3) O 19        | 0.05 | 1.62 | 0.012 |
| 72. BD ( 2) C 44 - C 46 | /614. BD* ( 1) C 15 - O 19 | 0.08 | 0.61 | 0.009 |
| 76. BD ( 1) C 46 - C 48 | /237. RY* ( 1) C 9         | 0.04 | 1.38 | 0.009 |

|                         |                            |      |      |       |
|-------------------------|----------------------------|------|------|-------|
| 77. BD ( 1) C 46 - O 65 | /214. RY* ( 2) C 6         | 0.06 | 2.00 | 0.014 |
| 151. LP ( 1) N 42       | /614. BD* ( 1) C 15 - O 19 | 0.04 | 0.62 | 0.006 |
| 152. LP ( 2) N 42       | /214. RY* ( 2) C 6         | 0.13 | 1.61 | 0.019 |
| 152. LP ( 2) N 42       | /216. RY* ( 4) C 6         | 0.08 | 1.49 | 0.015 |
| 152. LP ( 2) N 42       | /218. RY* ( 6) C 6         | 0.05 | 3.66 | 0.017 |
| 152. LP ( 2) N 42       | /253. RY* ( 1) N 11        | 0.24 | 1.80 | 0.027 |
| 152. LP ( 2) N 42       | /254. RY* ( 2) N 11        | 0.23 | 1.85 | 0.027 |
| 152. LP ( 2) N 42       | /255. RY* ( 3) N 11        | 0.15 | 1.71 | 0.021 |
| 152. LP ( 2) N 42       | /256. RY* ( 4) N 11        | 0.07 | 1.98 | 0.015 |
| 152. LP ( 2) N 42       | /285. RY* ( 1) C 15        | 0.17 | 1.61 | 0.021 |
| 152. LP ( 2) N 42       | /286. RY* ( 2) C 15        | 0.03 | 1.21 | 0.008 |
| 152. LP ( 2) N 42       | /289. RY* ( 5) C 15        | 0.08 | 3.89 | 0.022 |
| 152. LP ( 2) N 42       | /317. RY* ( 1) O 19        | 0.53 | 2.82 | 0.050 |
| 152. LP ( 2) N 42       | /319. RY* ( 3) O 19        | 0.10 | 1.78 | 0.018 |
| 152. LP ( 2) N 42       | /320. RY* ( 4) O 19        | 0.04 | 2.25 | 0.012 |
| 152. LP ( 2) N 42       | /614. BD* ( 1) C 15 - O 19 | 0.15 | 0.77 | 0.014 |
| 159. LP ( 1) O 65       | /253. RY* ( 1) N 11        | 0.12 | 1.93 | 0.019 |
| 159. LP ( 1) O 65       | /254. RY* ( 2) N 11        | 0.10 | 1.98 | 0.018 |
| 159. LP ( 1) O 65       | /255. RY* ( 3) N 11        | 0.10 | 1.84 | 0.017 |
| 159. LP ( 1) O 65       | /256. RY* ( 4) N 11        | 0.05 | 2.10 | 0.013 |
| 159. LP ( 1) O 65       | /285. RY* ( 1) C 15        | 0.05 | 1.74 | 0.011 |
| 159. LP ( 1) O 65       | /317. RY* ( 1) O 19        | 0.13 | 2.94 | 0.025 |
| 159. LP ( 1) O 65       | /603. BD* ( 2) C 9 - C 10  | 0.10 | 0.61 | 0.012 |
| 159. LP ( 1) O 65       | /606. BD* ( 1) N 11 - N 12 | 0.03 | 1.06 | 0.007 |
| 160. LP ( 2) O 65       | /214. RY* ( 2) C 6         | 0.08 | 1.62 | 0.014 |
| 160. LP ( 2) O 65       | /253. RY* ( 1) N 11        | 0.17 | 1.82 | 0.022 |
| 160. LP ( 2) O 65       | /254. RY* ( 2) N 11        | 0.24 | 1.87 | 0.027 |
| 160. LP ( 2) O 65       | /255. RY* ( 3) N 11        | 0.13 | 1.73 | 0.019 |
| 160. LP ( 2) O 65       | /256. RY* ( 4) N 11        | 0.03 | 1.99 | 0.010 |
| 160. LP ( 2) O 65       | /263. RY* ( 3) N 12        | 0.03 | 1.57 | 0.009 |
| 160. LP ( 2) O 65       | /285. RY* ( 1) C 15        | 0.13 | 1.63 | 0.019 |
| 160. LP ( 2) O 65       | /286. RY* ( 2) C 15        | 0.03 | 1.22 | 0.008 |
| 160. LP ( 2) O 65       | /289. RY* ( 5) C 15        | 0.05 | 3.90 | 0.018 |
| 160. LP ( 2) O 65       | /317. RY* ( 1) O 19        | 0.26 | 2.83 | 0.034 |
| 160. LP ( 2) O 65       | /319. RY* ( 3) O 19        | 0.05 | 1.79 | 0.012 |
| 160. LP ( 2) O 65       | /320. RY* ( 4) O 19        | 0.03 | 2.27 | 0.010 |
| 160. LP ( 2) O 65       | /606. BD* ( 1) N 11 - N 12 | 0.03 | 0.95 | 0.007 |
| 161. LP ( 3) O 65       | /214. RY* ( 2) C 6         | 0.03 | 1.47 | 0.008 |
| 161. LP ( 3) O 65       | /253. RY* ( 1) N 11        | 0.06 | 1.66 | 0.013 |
| 161. LP ( 3) O 65       | /254. RY* ( 2) N 11        | 0.08 | 1.72 | 0.016 |
| 161. LP ( 3) O 65       | /255. RY* ( 3) N 11        | 0.09 | 1.58 | 0.015 |
| 161. LP ( 3) O 65       | /256. RY* ( 4) N 11        | 0.03 | 1.84 | 0.009 |
| 161. LP ( 3) O 65       | /317. RY* ( 1) O 19        | 0.07 | 2.68 | 0.018 |
| 161. LP ( 3) O 65       | /596. BD* ( 1) C 6 - N 11  | 0.03 | 0.68 | 0.006 |
| 161. LP ( 3) O 65       | /606. BD* ( 1) N 11 - N 12 | 0.05 | 0.80 | 0.008 |
| 161. LP ( 3) O 65       | /614. BD* ( 1) C 15 - O 19 | 0.08 | 0.63 | 0.009 |

within unit 2

|                         |                            |      |      |       |
|-------------------------|----------------------------|------|------|-------|
| 42. BD ( 1) C 32 - C 33 | /372. RY* ( 2) C 34        | 0.55 | 2.00 | 0.042 |
| 42. BD ( 1) C 32 - C 33 | /373. RY* ( 3) C 34        | 0.27 | 2.01 | 0.030 |
| 42. BD ( 1) C 32 - C 33 | /380. RY* ( 2) C 35        | 0.72 | 2.25 | 0.051 |
| 42. BD ( 1) C 32 - C 33 | /404. RY* ( 2) C 38        | 0.65 | 1.88 | 0.044 |
| 42. BD ( 1) C 32 - C 33 | /623. BD* ( 1) C 32 - C 34 | 1.49 | 1.26 | 0.055 |
| 42. BD ( 1) C 32 - C 33 | /625. BD* ( 1) C 33 - C 35 | 1.24 | 1.27 | 0.050 |
| 42. BD ( 1) C 32 - C 33 | /626. BD* ( 1) C 33 - C 38 | 0.61 | 1.10 | 0.033 |
| 42. BD ( 1) C 32 - C 33 | /628. BD* ( 1) C 34 - H 51 | 1.36 | 1.08 | 0.049 |
| 42. BD ( 1) C 32 - C 33 | /630. BD* ( 1) C 35 - C 40 | 2.08 | 1.11 | 0.061 |
| 42. BD ( 1) C 32 - C 33 | /634. BD* ( 1) C 38 - C 39 | 0.69 | 1.30 | 0.038 |
| 43. BD ( 2) C 32 - C 33 | / 50. BD* ( 2) C 34 - C 36 | 5.37 | 0.22 | 0.064 |
| 43. BD ( 2) C 32 - C 33 | / 54. BD* ( 2) C 35 - C 37 | 6.26 | 0.24 | 0.065 |
| 43. BD ( 2) C 32 - C 33 | /371. RY* ( 1) C 34        | 1.12 | 0.77 | 0.038 |
| 43. BD ( 2) C 32 - C 33 | /379. RY* ( 1) C 35        | 0.89 | 0.87 | 0.036 |
| 43. BD ( 2) C 32 - C 33 | /403. RY* ( 1) C 38        | 0.59 | 0.81 | 0.028 |
| 43. BD ( 2) C 32 - C 33 | /499. RY* ( 1) O 50        | 0.35 | 1.15 | 0.026 |
| 43. BD ( 2) C 32 - C 33 | /622. BD* ( 2) C 32 - C 33 | 0.37 | 0.23 | 0.015 |
| 43. BD ( 2) C 32 - C 33 | /635. BD* ( 2) C 38 - C 39 | 6.49 | 0.30 | 0.065 |
| 43. BD ( 2) C 32 - C 33 | /640. BD* ( 2) C 40 - C 41 | 0.26 | 0.30 | 0.013 |
| 44. BD ( 1) C 32 - C 34 | /365. RY* ( 3) C 33        | 0.69 | 2.22 | 0.049 |
| 44. BD ( 1) C 32 - C 34 | /389. RY* ( 3) C 36        | 0.57 | 1.99 | 0.043 |
| 44. BD ( 1) C 32 - C 34 | /621. BD* ( 1) C 32 - C 33 | 1.47 | 1.19 | 0.053 |
| 44. BD ( 1) C 32 - C 34 | /624. BD* ( 1) C 32 - O 50 | 0.28 | 1.04 | 0.022 |



|                          |                            |        |      |       |
|--------------------------|----------------------------|--------|------|-------|
| 44. BD ( 1) C 32 - C 34  | /626. BD* ( 1) C 33 - C 38 | 1.12   | 1.22 | 0.047 |
| 44. BD ( 1) C 32 - C 34  | /627. BD* ( 1) C 34 - C 36 | 0.77   | 1.23 | 0.039 |
| 44. BD ( 1) C 32 - C 34  | /628. BD* ( 1) C 34 - H 51 | 0.61   | 1.20 | 0.034 |
| 44. BD ( 1) C 32 - C 34  | /632. BD* ( 1) C 36 - H 61 | 0.67   | 1.21 | 0.036 |
| 44. BD ( 1) C 32 - C 34  | /659. BD* ( 1) O 50 - H 60 | 0.73   | 1.08 | 0.036 |
| 45. BD ( 1) C 32 - O 50  | /372. RY* ( 2) C 34        | 0.28   | 2.24 | 0.032 |
| 45. BD ( 1) C 32 - O 50  | /623. BD* ( 1) C 32 - C 34 | 0.38   | 1.51 | 0.030 |
| 45. BD ( 1) C 32 - O 50  | /625. BD* ( 1) C 33 - C 35 | 0.56   | 1.52 | 0.037 |
| 45. BD ( 1) C 32 - O 50  | /627. BD* ( 1) C 34 - C 36 | 1.00   | 1.36 | 0.047 |
| 46. BD ( 1) C 33 - C 35  | /357. RY* ( 3) C 32        | 0.44   | 2.18 | 0.039 |
| 46. BD ( 1) C 33 - C 35  | /395. RY* ( 1) C 37        | 0.27   | 1.65 | 0.027 |
| 46. BD ( 1) C 33 - C 35  | /396. RY* ( 2) C 37        | 0.41   | 1.84 | 0.035 |
| 46. BD ( 1) C 33 - C 35  | /404. RY* ( 2) C 38        | 0.39   | 1.98 | 0.035 |
| 46. BD ( 1) C 33 - C 35  | /420. RY* ( 2) C 40        | 0.36   | 1.91 | 0.033 |
| 46. BD ( 1) C 33 - C 35  | /621. BD* ( 1) C 32 - C 33 | 1.23   | 1.16 | 0.048 |
| 46. BD ( 1) C 33 - C 35  | /624. BD* ( 1) C 32 - O 50 | 1.32   | 1.02 | 0.046 |
| 46. BD ( 1) C 33 - C 35  | /626. BD* ( 1) C 33 - C 38 | 1.62   | 1.19 | 0.056 |
| 46. BD ( 1) C 33 - C 35  | /629. BD* ( 1) C 35 - C 37 | 1.54   | 1.20 | 0.054 |
| 46. BD ( 1) C 33 - C 35  | /630. BD* ( 1) C 35 - C 40 | 1.54   | 1.21 | 0.054 |
| 46. BD ( 1) C 33 - C 35  | /633. BD* ( 1) C 37 - N 42 | 1.35   | 1.13 | 0.049 |
| 46. BD ( 1) C 33 - C 35  | /636. BD* ( 1) C 38 - H 52 | 0.76   | 1.20 | 0.038 |
| 46. BD ( 1) C 33 - C 35  | /641. BD* ( 1) C 40 - H 54 | 0.72   | 1.20 | 0.037 |
| 47. BD ( 1) C 33 - C 38  | /355. RY* ( 1) C 32        | 0.34   | 1.54 | 0.029 |
| 47. BD ( 1) C 33 - C 38  | /357. RY* ( 3) C 32        | 0.34   | 2.07 | 0.034 |
| 47. BD ( 1) C 33 - C 38  | /380. RY* ( 2) C 35        | 0.45   | 2.23 | 0.040 |
| 47. BD ( 1) C 33 - C 38  | /412. RY* ( 2) C 39        | 0.31   | 1.99 | 0.031 |
| 47. BD ( 1) C 33 - C 38  | /413. RY* ( 3) C 39        | 0.71   | 2.00 | 0.048 |
| 47. BD ( 1) C 33 - C 38  | /621. BD* ( 1) C 32 - C 33 | 0.49   | 1.05 | 0.029 |
| 47. BD ( 1) C 33 - C 38  | /623. BD* ( 1) C 32 - C 34 | 0.75   | 1.24 | 0.039 |
| 47. BD ( 1) C 33 - C 38  | /625. BD* ( 1) C 33 - C 35 | 1.80   | 1.25 | 0.060 |
| 47. BD ( 1) C 33 - C 38  | /629. BD* ( 1) C 35 - C 37 | 2.42   | 1.08 | 0.065 |
| 47. BD ( 1) C 33 - C 38  | /634. BD* ( 1) C 38 - C 39 | 1.26   | 1.28 | 0.051 |
| 47. BD ( 1) C 33 - C 38  | /636. BD* ( 1) C 38 - H 52 | 0.30   | 1.08 | 0.023 |
| 47. BD ( 1) C 33 - C 38  | /638. BD* ( 1) C 39 - H 53 | 1.37   | 1.08 | 0.049 |
| 48. BD ( 1) C 34 - C 36  | /355. RY* ( 1) C 32        | 0.36   | 1.57 | 0.030 |
| 48. BD ( 1) C 34 - C 36  | /356. RY* ( 2) C 32        | 0.39   | 1.43 | 0.030 |
| 48. BD ( 1) C 34 - C 36  | /357. RY* ( 3) C 32        | 0.36   | 2.09 | 0.035 |
| 48. BD ( 1) C 34 - C 36  | /397. RY* ( 3) C 37        | 0.95   | 1.79 | 0.052 |
| 48. BD ( 1) C 34 - C 36  | /623. BD* ( 1) C 32 - C 34 | 0.84   | 1.26 | 0.041 |
| 48. BD ( 1) C 34 - C 36  | /624. BD* ( 1) C 32 - O 50 | 2.66   | 0.92 | 0.063 |
| 48. BD ( 1) C 34 - C 36  | /631. BD* ( 1) C 36 - C 37 | 1.08   | 1.29 | 0.047 |
| 48. BD ( 1) C 34 - C 36  | /633. BD* ( 1) C 37 - N 42 | 2.85   | 1.04 | 0.069 |
| 49. BD ( 2) C 34 - C 36  | / 54. BD* ( 2) C 35 - C 37 | 6.75   | 0.24 | 0.068 |
| 49. BD ( 2) C 34 - C 36  | /356. RY* ( 2) C 32        | 0.26   | 1.06 | 0.022 |
| 49. BD ( 2) C 34 - C 36  | /395. RY* ( 1) C 37        | 0.35   | 1.18 | 0.026 |
| 49. BD ( 2) C 34 - C 36  | /622. BD* ( 2) C 32 - C 33 | 7.76   | 0.23 | 0.071 |
| 50. BD* ( 2) C 34 - C 36 | / 54. BD* ( 2) C 35 - C 37 | 338.46 | 0.02 | 0.094 |
| 50. BD* ( 2) C 34 - C 36 | /371. RY* ( 1) C 34        | 2.02   | 0.54 | 0.054 |
| 50. BD* ( 2) C 34 - C 36 | /387. RY* ( 1) C 36        | 1.69   | 0.59 | 0.052 |
| 51. BD ( 1) C 34 - H 51  | /357. RY* ( 3) C 32        | 0.48   | 1.95 | 0.039 |
| 51. BD ( 1) C 34 - H 51  | /360. RY* ( 6) C 32        | 0.29   | 8.50 | 0.063 |
| 51. BD ( 1) C 34 - H 51  | /388. RY* ( 2) C 36        | 0.49   | 1.78 | 0.037 |
| 51. BD ( 1) C 34 - H 51  | /621. BD* ( 1) C 32 - C 33 | 3.08   | 0.94 | 0.068 |
| 51. BD ( 1) C 34 - H 51  | /623. BD* ( 1) C 32 - C 34 | 0.41   | 1.13 | 0.027 |
| 51. BD ( 1) C 34 - H 51  | /624. BD* ( 1) C 32 - O 50 | 0.94   | 0.79 | 0.034 |
| 51. BD ( 1) C 34 - H 51  | /631. BD* ( 1) C 36 - C 37 | 1.42   | 1.15 | 0.051 |
| 51. BD ( 1) C 34 - H 51  | /632. BD* ( 1) C 36 - H 61 | 0.29   | 0.96 | 0.021 |
| 52. BD ( 1) C 35 - C 37  | /364. RY* ( 2) C 33        | 0.84   | 2.34 | 0.056 |
| 52. BD ( 1) C 35 - C 37  | /388. RY* ( 2) C 36        | 0.50   | 1.91 | 0.039 |
| 52. BD ( 1) C 35 - C 37  | /420. RY* ( 2) C 40        | 0.62   | 1.81 | 0.043 |
| 52. BD ( 1) C 35 - C 37  | /436. RY* ( 2) N 42        | 0.49   | 1.60 | 0.035 |
| 52. BD ( 1) C 35 - C 37  | /625. BD* ( 1) C 33 - C 35 | 1.49   | 1.27 | 0.055 |
| 52. BD ( 1) C 35 - C 37  | /626. BD* ( 1) C 33 - C 38 | 2.00   | 1.10 | 0.059 |
| 52. BD ( 1) C 35 - C 37  | /630. BD* ( 1) C 35 - C 40 | 0.78   | 1.11 | 0.037 |
| 52. BD ( 1) C 35 - C 37  | /631. BD* ( 1) C 36 - C 37 | 1.59   | 1.28 | 0.057 |
| 52. BD ( 1) C 35 - C 37  | /632. BD* ( 1) C 36 - H 61 | 1.47   | 1.09 | 0.051 |
| 52. BD ( 1) C 35 - C 37  | /633. BD* ( 1) C 37 - N 42 | 0.29   | 1.03 | 0.022 |
| 52. BD ( 1) C 35 - C 37  | /639. BD* ( 1) C 40 - C 41 | 0.74   | 1.31 | 0.039 |
| 53. BD ( 2) C 35 - C 37  | / 50. BD* ( 2) C 34 - C 36 | 5.84   | 0.22 | 0.066 |
| 53. BD ( 2) C 35 - C 37  | /363. RY* ( 1) C 33        | 0.93   | 0.86 | 0.037 |
| 53. BD ( 2) C 35 - C 37  | /387. RY* ( 1) C 36        | 1.25   | 0.81 | 0.041 |

|                          |                            |       |      |       |
|--------------------------|----------------------------|-------|------|-------|
| 53. BD ( 2) C 35 - C 37  | /419. RY* ( 1) C 40        | 0.48  | 0.91 | 0.027 |
| 53. BD ( 2) C 35 - C 37  | /622. BD* ( 2) C 32 - C 33 | 6.25  | 0.22 | 0.062 |
| 53. BD ( 2) C 35 - C 37  | /640. BD* ( 2) C 40 - C 41 | 6.59  | 0.30 | 0.065 |
| 53. BD ( 2) C 35 - C 37  | /643. BD* ( 1) N 42 - N 43 | 2.04  | 0.79 | 0.052 |
| 54. BD* ( 2) C 35 - C 37 | /363. RY* ( 1) C 33        | 0.71  | 0.62 | 0.038 |
| 54. BD* ( 2) C 35 - C 37 | /379. RY* ( 1) C 35        | 1.18  | 0.63 | 0.049 |
| 54. BD* ( 2) C 35 - C 37 | /387. RY* ( 1) C 36        | 1.19  | 0.58 | 0.047 |
| 54. BD* ( 2) C 35 - C 37 | /395. RY* ( 1) C 37        | 0.45  | 0.94 | 0.037 |
| 54. BD* ( 2) C 35 - C 37 | /396. RY* ( 2) C 37        | 0.27  | 1.14 | 0.031 |
| 54. BD* ( 2) C 35 - C 37 | /419. RY* ( 1) C 40        | 0.33  | 0.67 | 0.027 |
| 54. BD* ( 2) C 35 - C 37 | /635. BD* ( 2) C 38 - C 39 | 0.27  | 0.06 | 0.006 |
| 54. BD* ( 2) C 35 - C 37 | /640. BD* ( 2) C 40 - C 41 | 49.04 | 0.06 | 0.078 |
| 54. BD* ( 2) C 35 - C 37 | /643. BD* ( 1) N 42 - N 43 | 2.12  | 0.55 | 0.061 |
| 55. BD ( 1) C 35 - C 40  | /364. RY* ( 2) C 33        | 0.45  | 2.32 | 0.041 |
| 55. BD ( 1) C 35 - C 40  | /395. RY* ( 1) C 37        | 0.55  | 1.53 | 0.037 |
| 55. BD ( 1) C 35 - C 40  | /396. RY* ( 2) C 37        | 0.68  | 1.73 | 0.044 |
| 55. BD ( 1) C 35 - C 40  | /428. RY* ( 2) C 41        | 0.34  | 2.00 | 0.033 |
| 55. BD ( 1) C 35 - C 40  | /429. RY* ( 3) C 41        | 0.75  | 2.00 | 0.049 |
| 55. BD ( 1) C 35 - C 40  | /621. BD* ( 1) C 32 - C 33 | 2.38  | 1.05 | 0.063 |
| 55. BD ( 1) C 35 - C 40  | /625. BD* ( 1) C 33 - C 35 | 1.76  | 1.25 | 0.059 |
| 55. BD ( 1) C 35 - C 40  | /629. BD* ( 1) C 35 - C 37 | 0.79  | 1.08 | 0.037 |
| 55. BD ( 1) C 35 - C 40  | /631. BD* ( 1) C 36 - C 37 | 1.03  | 1.27 | 0.046 |
| 55. BD ( 1) C 35 - C 40  | /639. BD* ( 1) C 40 - C 41 | 1.34  | 1.29 | 0.053 |
| 55. BD ( 1) C 35 - C 40  | /641. BD* ( 1) C 40 - H 54 | 0.32  | 1.09 | 0.024 |
| 55. BD ( 1) C 35 - C 40  | /642. BD* ( 1) C 41 - H 55 | 1.43  | 1.08 | 0.050 |
| 56. BD ( 1) C 36 - C 37  | /373. RY* ( 3) C 34        | 0.65  | 2.11 | 0.047 |
| 56. BD ( 1) C 36 - C 37  | /381. RY* ( 3) C 35        | 0.71  | 2.33 | 0.052 |
| 56. BD ( 1) C 36 - C 37  | /436. RY* ( 2) N 42        | 0.41  | 1.71 | 0.034 |
| 56. BD ( 1) C 36 - C 37  | /627. BD* ( 1) C 34 - C 36 | 0.97  | 1.22 | 0.044 |
| 56. BD ( 1) C 36 - C 37  | /628. BD* ( 1) C 34 - H 51 | 0.60  | 1.19 | 0.034 |
| 56. BD ( 1) C 36 - C 37  | /629. BD* ( 1) C 35 - C 37 | 1.64  | 1.21 | 0.057 |
| 56. BD ( 1) C 36 - C 37  | /630. BD* ( 1) C 35 - C 40 | 1.11  | 1.22 | 0.047 |
| 56. BD ( 1) C 36 - C 37  | /632. BD* ( 1) C 36 - H 61 | 0.77  | 1.20 | 0.038 |
| 56. BD ( 1) C 36 - C 37  | /633. BD* ( 1) C 37 - N 42 | 0.75  | 1.15 | 0.037 |
| 56. BD ( 1) C 36 - C 37  | /643. BD* ( 1) N 42 - N 43 | 0.48  | 1.27 | 0.031 |
| 57. BD ( 1) C 36 - H 61  | /372. RY* ( 2) C 34        | 0.47  | 1.86 | 0.038 |
| 57. BD ( 1) C 36 - H 61  | /395. RY* ( 1) C 37        | 0.45  | 1.42 | 0.032 |
| 57. BD ( 1) C 36 - H 61  | /396. RY* ( 2) C 37        | 0.70  | 1.61 | 0.043 |
| 57. BD ( 1) C 36 - H 61  | /398. RY* ( 4) C 37        | 0.28  | 1.56 | 0.027 |
| 57. BD ( 1) C 36 - H 61  | /623. BD* ( 1) C 32 - C 34 | 1.33  | 1.12 | 0.049 |
| 57. BD ( 1) C 36 - H 61  | /628. BD* ( 1) C 34 - H 51 | 0.28  | 0.95 | 0.020 |
| 57. BD ( 1) C 36 - H 61  | /629. BD* ( 1) C 35 - C 37 | 3.32  | 0.97 | 0.072 |
| 57. BD ( 1) C 36 - H 61  | /631. BD* ( 1) C 36 - C 37 | 0.68  | 1.15 | 0.035 |
| 57. BD ( 1) C 36 - H 61  | /633. BD* ( 1) C 37 - N 42 | 0.67  | 0.90 | 0.031 |
| 58. BD ( 1) C 37 - N 42  | /381. RY* ( 3) C 35        | 0.62  | 2.34 | 0.048 |
| 58. BD ( 1) C 37 - N 42  | /388. RY* ( 2) C 36        | 0.59  | 2.03 | 0.044 |
| 58. BD ( 1) C 37 - N 42  | /443. RY* ( 1) N 43        | 0.90  | 1.65 | 0.049 |
| 58. BD ( 1) C 37 - N 42  | /625. BD* ( 1) C 33 - C 35 | 0.78  | 1.39 | 0.042 |
| 58. BD ( 1) C 37 - N 42  | /627. BD* ( 1) C 34 - C 36 | 1.27  | 1.23 | 0.050 |
| 58. BD ( 1) C 37 - N 42  | /629. BD* ( 1) C 35 - C 37 | 0.51  | 1.22 | 0.032 |
| 58. BD ( 1) C 37 - N 42  | /631. BD* ( 1) C 36 - C 37 | 0.93  | 1.41 | 0.046 |
| 58. BD ( 1) C 37 - N 42  | /643. BD* ( 1) N 42 - N 43 | 0.48  | 1.29 | 0.032 |
| 58. BD ( 1) C 37 - N 42  | /644. BD* ( 1) N 43 - C 44 | 2.84  | 1.15 | 0.072 |
| 59. BD ( 1) C 38 - C 39  | /364. RY* ( 2) C 33        | 0.47  | 2.43 | 0.043 |
| 59. BD ( 1) C 38 - C 39  | /365. RY* ( 3) C 33        | 0.46  | 2.19 | 0.040 |
| 59. BD ( 1) C 38 - C 39  | /428. RY* ( 2) C 41        | 0.41  | 2.11 | 0.037 |
| 59. BD ( 1) C 38 - C 39  | /429. RY* ( 3) C 41        | 0.40  | 2.11 | 0.037 |
| 59. BD ( 1) C 38 - C 39  | /621. BD* ( 1) C 32 - C 33 | 1.28  | 1.16 | 0.049 |
| 59. BD ( 1) C 38 - C 39  | /626. BD* ( 1) C 33 - C 38 | 1.36  | 1.19 | 0.051 |
| 59. BD ( 1) C 38 - C 39  | /636. BD* ( 1) C 38 - H 52 | 0.81  | 1.19 | 0.039 |
| 59. BD ( 1) C 38 - C 39  | /637. BD* ( 1) C 39 - C 41 | 0.95  | 1.21 | 0.043 |
| 59. BD ( 1) C 38 - C 39  | /638. BD* ( 1) C 39 - H 53 | 0.67  | 1.19 | 0.036 |
| 59. BD ( 1) C 38 - C 39  | /642. BD* ( 1) C 41 - H 55 | 0.77  | 1.19 | 0.038 |
| 60. BD ( 2) C 38 - C 39  | /363. RY* ( 1) C 33        | 0.41  | 0.86 | 0.024 |
| 60. BD ( 2) C 38 - C 39  | /427. RY* ( 1) C 41        | 0.69  | 0.78 | 0.030 |
| 60. BD ( 2) C 38 - C 39  | /622. BD* ( 2) C 32 - C 33 | 3.64  | 0.23 | 0.049 |
| 60. BD ( 2) C 38 - C 39  | /640. BD* ( 2) C 40 - C 41 | 4.34  | 0.30 | 0.054 |
| 61. BD ( 1) C 38 - H 52  | /364. RY* ( 2) C 33        | 0.67  | 2.20 | 0.049 |
| 61. BD ( 1) C 38 - H 52  | /412. RY* ( 2) C 39        | 0.72  | 1.87 | 0.047 |
| 61. BD ( 1) C 38 - H 52  | /625. BD* ( 1) C 33 - C 35 | 1.60  | 1.13 | 0.054 |
| 61. BD ( 1) C 38 - H 52  | /634. BD* ( 1) C 38 - C 39 | 0.67  | 1.16 | 0.035 |

|                         |                            |      |      |       |
|-------------------------|----------------------------|------|------|-------|
| 61. BD ( 1) C 38 - H 52 | /637. BD* ( 1) C 39 - C 41 | 2.62 | 0.98 | 0.064 |
| 61. BD ( 1) C 38 - H 52 | /638. BD* ( 1) C 39 - H 53 | 0.46 | 0.96 | 0.027 |
| 62. BD ( 1) C 39 - C 41 | /405. RY* ( 3) C 38        | 0.93 | 1.78 | 0.052 |
| 62. BD ( 1) C 39 - C 41 | /421. RY* ( 3) C 40        | 0.92 | 1.76 | 0.051 |
| 62. BD ( 1) C 39 - C 41 | /634. BD* ( 1) C 38 - C 39 | 1.06 | 1.29 | 0.047 |
| 62. BD ( 1) C 39 - C 41 | /636. BD* ( 1) C 38 - H 52 | 1.65 | 1.09 | 0.054 |
| 62. BD ( 1) C 39 - C 41 | /639. BD* ( 1) C 40 - C 41 | 1.13 | 1.30 | 0.049 |
| 62. BD ( 1) C 39 - C 41 | /641. BD* ( 1) C 40 - H 54 | 1.74 | 1.10 | 0.055 |
| 63. BD ( 1) C 39 - H 53 | /404. RY* ( 2) C 38        | 0.68 | 1.74 | 0.044 |
| 63. BD ( 1) C 39 - H 53 | /428. RY* ( 2) C 41        | 0.58 | 1.88 | 0.042 |
| 63. BD ( 1) C 39 - H 53 | /626. BD* ( 1) C 33 - C 38 | 3.21 | 0.95 | 0.070 |
| 63. BD ( 1) C 39 - H 53 | /634. BD* ( 1) C 38 - C 39 | 0.58 | 1.16 | 0.033 |
| 63. BD ( 1) C 39 - H 53 | /636. BD* ( 1) C 38 - H 52 | 0.56 | 0.96 | 0.029 |
| 63. BD ( 1) C 39 - H 53 | /639. BD* ( 1) C 40 - C 41 | 1.32 | 1.17 | 0.050 |
| 63. BD ( 1) C 39 - H 53 | /642. BD* ( 1) C 41 - H 55 | 0.26 | 0.96 | 0.020 |
| 64. BD ( 1) C 40 - C 41 | /380. RY* ( 2) C 35        | 0.64 | 2.33 | 0.049 |
| 64. BD ( 1) C 40 - C 41 | /381. RY* ( 3) C 35        | 0.35 | 2.31 | 0.036 |
| 64. BD ( 1) C 40 - C 41 | /412. RY* ( 2) C 39        | 0.40 | 2.09 | 0.037 |
| 64. BD ( 1) C 40 - C 41 | /413. RY* ( 3) C 39        | 0.38 | 2.10 | 0.036 |
| 64. BD ( 1) C 40 - C 41 | /629. BD* ( 1) C 35 - C 37 | 1.21 | 1.19 | 0.048 |
| 64. BD ( 1) C 40 - C 41 | /630. BD* ( 1) C 35 - C 40 | 1.40 | 1.20 | 0.052 |
| 64. BD ( 1) C 40 - C 41 | /637. BD* ( 1) C 39 - C 41 | 1.01 | 1.21 | 0.044 |
| 64. BD ( 1) C 40 - C 41 | /638. BD* ( 1) C 39 - H 53 | 0.75 | 1.19 | 0.038 |
| 64. BD ( 1) C 40 - C 41 | /641. BD* ( 1) C 40 - H 54 | 0.85 | 1.20 | 0.040 |
| 64. BD ( 1) C 40 - C 41 | /642. BD* ( 1) C 41 - H 55 | 0.74 | 1.19 | 0.038 |
| 65. BD ( 2) C 40 - C 41 | / 54. BD* ( 2) C 35 - C 37 | 3.68 | 0.24 | 0.051 |
| 65. BD ( 2) C 40 - C 41 | /379. RY* ( 1) C 35        | 0.38 | 0.87 | 0.023 |
| 65. BD ( 2) C 40 - C 41 | /411. RY* ( 1) C 39        | 0.66 | 0.77 | 0.029 |
| 65. BD ( 2) C 40 - C 41 | /635. BD* ( 2) C 38 - C 39 | 4.63 | 0.30 | 0.055 |
| 65. BD ( 2) C 40 - C 41 | /640. BD* ( 2) C 40 - C 41 | 0.30 | 0.30 | 0.014 |
| 66. BD ( 1) C 40 - H 54 | /380. RY* ( 2) C 35        | 0.70 | 2.10 | 0.048 |
| 66. BD ( 1) C 40 - H 54 | /428. RY* ( 2) C 41        | 0.70 | 1.88 | 0.046 |
| 66. BD ( 1) C 40 - H 54 | /625. BD* ( 1) C 33 - C 35 | 1.74 | 1.13 | 0.056 |
| 66. BD ( 1) C 40 - H 54 | /637. BD* ( 1) C 39 - C 41 | 2.62 | 0.98 | 0.064 |
| 66. BD ( 1) C 40 - H 54 | /639. BD* ( 1) C 40 - C 41 | 0.75 | 1.17 | 0.037 |
| 66. BD ( 1) C 40 - H 54 | /642. BD* ( 1) C 41 - H 55 | 0.46 | 0.96 | 0.027 |
| 67. BD ( 1) C 41 - H 55 | /412. RY* ( 2) C 39        | 0.55 | 1.86 | 0.041 |
| 67. BD ( 1) C 41 - H 55 | /420. RY* ( 2) C 40        | 0.63 | 1.66 | 0.041 |
| 67. BD ( 1) C 41 - H 55 | /630. BD* ( 1) C 35 - C 40 | 3.21 | 0.96 | 0.070 |
| 67. BD ( 1) C 41 - H 55 | /634. BD* ( 1) C 38 - C 39 | 1.32 | 1.15 | 0.049 |
| 67. BD ( 1) C 41 - H 55 | /638. BD* ( 1) C 39 - H 53 | 0.26 | 0.95 | 0.020 |
| 67. BD ( 1) C 41 - H 55 | /639. BD* ( 1) C 40 - C 41 | 0.66 | 1.16 | 0.035 |
| 67. BD ( 1) C 41 - H 55 | /641. BD* ( 1) C 40 - H 54 | 0.50 | 0.96 | 0.028 |
| 68. BD ( 1) N 42 - N 43 | /395. RY* ( 1) C 37        | 0.79 | 1.87 | 0.049 |
| 68. BD ( 1) N 42 - N 43 | /451. RY* ( 1) C 44        | 0.73 | 2.10 | 0.049 |
| 68. BD ( 1) N 42 - N 43 | /452. RY* ( 2) C 44        | 0.86 | 2.37 | 0.057 |
| 68. BD ( 1) N 42 - N 43 | /631. BD* ( 1) C 36 - C 37 | 0.28 | 1.60 | 0.027 |
| 68. BD ( 1) N 42 - N 43 | /633. BD* ( 1) C 37 - N 42 | 0.50 | 1.35 | 0.033 |
| 68. BD ( 1) N 42 - N 43 | /644. BD* ( 1) N 43 - C 44 | 0.34 | 1.34 | 0.027 |
| 68. BD ( 1) N 42 - N 43 | /645. BD* ( 1) C 44 - C 45 | 0.56 | 1.42 | 0.036 |
| 69. BD ( 1) N 43 - C 44 | /395. RY* ( 1) C 37        | 0.28 | 1.67 | 0.028 |
| 69. BD ( 1) N 43 - C 44 | /435. RY* ( 1) N 42        | 0.77 | 2.67 | 0.057 |
| 69. BD ( 1) N 43 - C 44 | /437. RY* ( 3) N 42        | 0.50 | 2.00 | 0.040 |
| 69. BD ( 1) N 43 - C 44 | /438. RY* ( 4) N 42        | 0.28 | 2.27 | 0.032 |
| 69. BD ( 1) N 43 - C 44 | /459. RY* ( 1) C 45        | 0.40 | 2.05 | 0.036 |
| 69. BD ( 1) N 43 - C 44 | /467. RY* ( 1) C 46        | 0.45 | 1.94 | 0.037 |
| 69. BD ( 1) N 43 - C 44 | /633. BD* ( 1) C 37 - N 42 | 2.40 | 1.16 | 0.067 |
| 69. BD ( 1) N 43 - C 44 | /645. BD* ( 1) C 44 - C 45 | 0.33 | 1.22 | 0.025 |
| 69. BD ( 1) N 43 - C 44 | /646. BD* ( 1) C 44 - C 46 | 1.06 | 1.38 | 0.049 |
| 69. BD ( 1) N 43 - C 44 | /648. BD* ( 1) C 45 - C 47 | 0.49 | 1.42 | 0.033 |
| 69. BD ( 1) N 43 - C 44 | /651. BD* ( 1) C 46 - C 48 | 1.29 | 1.23 | 0.050 |
| 70. BD ( 1) C 44 - C 45 | /443. RY* ( 1) N 43        | 0.34 | 1.52 | 0.029 |
| 70. BD ( 1) C 44 - C 45 | /468. RY* ( 2) C 46        | 0.40 | 2.10 | 0.037 |
| 70. BD ( 1) C 44 - C 45 | /475. RY* ( 1) C 47        | 0.41 | 1.85 | 0.035 |
| 70. BD ( 1) C 44 - C 45 | /476. RY* ( 2) C 47        | 0.74 | 1.98 | 0.049 |
| 70. BD ( 1) C 44 - C 45 | /643. BD* ( 1) N 42 - N 43 | 1.58 | 1.16 | 0.054 |
| 70. BD ( 1) C 44 - C 45 | /644. BD* ( 1) N 43 - C 44 | 0.46 | 1.02 | 0.027 |
| 70. BD ( 1) C 44 - C 45 | /646. BD* ( 1) C 44 - C 46 | 1.77 | 1.25 | 0.060 |
| 70. BD ( 1) C 44 - C 45 | /648. BD* ( 1) C 45 - C 47 | 1.23 | 1.30 | 0.051 |
| 70. BD ( 1) C 44 - C 45 | /650. BD* ( 1) C 45 - H 56 | 0.30 | 1.09 | 0.023 |
| 70. BD ( 1) C 44 - C 45 | /652. BD* ( 1) C 46 - O 65 | 2.61 | 0.98 | 0.064 |

|                         |                            |      |      |       |
|-------------------------|----------------------------|------|------|-------|
| 70. BD ( 1) C 44 - C 45 | /654. BD* ( 1) C 47 - H 57 | 1.43 | 1.10 | 0.050 |
| 71. BD ( 1) C 44 - C 46 | /445. RY* ( 3) N 43        | 0.31 | 1.86 | 0.030 |
| 71. BD ( 1) C 44 - C 46 | /459. RY* ( 1) C 45        | 0.49 | 2.04 | 0.040 |
| 71. BD ( 1) C 44 - C 46 | /483. RY* ( 1) C 48        | 0.70 | 2.10 | 0.048 |
| 71. BD ( 1) C 44 - C 46 | /644. BD* ( 1) N 43 - C 44 | 0.74 | 1.14 | 0.037 |
| 71. BD ( 1) C 44 - C 46 | /645. BD* ( 1) C 44 - C 45 | 1.79 | 1.21 | 0.059 |
| 71. BD ( 1) C 44 - C 46 | /650. BD* ( 1) C 45 - H 56 | 0.65 | 1.21 | 0.035 |
| 71. BD ( 1) C 44 - C 46 | /651. BD* ( 1) C 46 - C 48 | 1.53 | 1.22 | 0.055 |
| 71. BD ( 1) C 44 - C 46 | /652. BD* ( 1) C 46 - O 65 | 0.38 | 1.09 | 0.026 |
| 71. BD ( 1) C 44 - C 46 | /657. BD* ( 1) C 48 - H 58 | 0.62 | 1.22 | 0.035 |
| 72. BD ( 2) C 44 - C 46 | /444. RY* ( 2) N 43        | 0.44 | 1.10 | 0.030 |
| 72. BD ( 2) C 44 - C 46 | /461. RY* ( 3) C 45        | 0.52 | 0.83 | 0.028 |
| 72. BD ( 2) C 44 - C 46 | /485. RY* ( 3) C 48        | 0.53 | 0.84 | 0.028 |
| 72. BD ( 2) C 44 - C 46 | /542. RY* ( 2) O 65        | 0.28 | 1.37 | 0.026 |
| 72. BD ( 2) C 44 - C 46 | /649. BD* ( 2) C 45 - C 47 | 6.40 | 0.33 | 0.058 |
| 72. BD ( 2) C 44 - C 46 | /656. BD* ( 2) C 48 - C 49 | 7.03 | 0.33 | 0.061 |
| 73. BD ( 1) C 45 - C 47 | /452. RY* ( 2) C 44        | 0.95 | 2.14 | 0.057 |
| 73. BD ( 1) C 45 - C 47 | /491. RY* ( 1) C 49        | 0.51 | 1.94 | 0.040 |
| 73. BD ( 1) C 45 - C 47 | /492. RY* ( 2) C 49        | 0.42 | 2.09 | 0.037 |
| 73. BD ( 1) C 45 - C 47 | /644. BD* ( 1) N 43 - C 44 | 1.31 | 1.12 | 0.048 |
| 73. BD ( 1) C 45 - C 47 | /645. BD* ( 1) C 44 - C 45 | 1.16 | 1.19 | 0.047 |
| 73. BD ( 1) C 45 - C 47 | /650. BD* ( 1) C 45 - H 56 | 0.86 | 1.19 | 0.041 |
| 73. BD ( 1) C 45 - C 47 | /653. BD* ( 1) C 47 - C 49 | 1.14 | 1.21 | 0.047 |
| 73. BD ( 1) C 45 - C 47 | /654. BD* ( 1) C 47 - H 57 | 0.76 | 1.20 | 0.038 |
| 73. BD ( 1) C 45 - C 47 | /658. BD* ( 1) C 49 - H 59 | 0.82 | 1.20 | 0.040 |
| 74. BD ( 2) C 45 - C 47 | /493. RY* ( 3) C 49        | 0.53 | 0.78 | 0.027 |
| 74. BD ( 2) C 45 - C 47 | /647. BD* ( 2) C 44 - C 46 | 6.01 | 0.29 | 0.057 |
| 74. BD ( 2) C 45 - C 47 | /656. BD* ( 2) C 48 - C 49 | 6.03 | 0.31 | 0.056 |
| 75. BD ( 1) C 45 - H 56 | /451. RY* ( 1) C 44        | 0.40 | 1.63 | 0.032 |
| 75. BD ( 1) C 45 - H 56 | /475. RY* ( 1) C 47        | 0.62 | 1.71 | 0.041 |
| 75. BD ( 1) C 45 - H 56 | /644. BD* ( 1) N 43 - C 44 | 0.33 | 0.88 | 0.021 |
| 75. BD ( 1) C 45 - H 56 | /646. BD* ( 1) C 44 - C 46 | 1.63 | 1.11 | 0.054 |
| 75. BD ( 1) C 45 - H 56 | /648. BD* ( 1) C 45 - C 47 | 0.76 | 1.16 | 0.037 |
| 75. BD ( 1) C 45 - H 56 | /653. BD* ( 1) C 47 - C 49 | 2.72 | 0.98 | 0.065 |
| 75. BD ( 1) C 45 - H 56 | /654. BD* ( 1) C 47 - H 57 | 0.50 | 0.96 | 0.028 |
| 76. BD ( 1) C 46 - C 48 | /451. RY* ( 1) C 44        | 0.60 | 1.77 | 0.041 |
| 76. BD ( 1) C 46 - C 48 | /453. RY* ( 3) C 44        | 0.27 | 1.53 | 0.026 |
| 76. BD ( 1) C 46 - C 48 | /491. RY* ( 1) C 49        | 0.36 | 1.84 | 0.033 |
| 76. BD ( 1) C 46 - C 48 | /492. RY* ( 2) C 49        | 0.72 | 1.99 | 0.048 |
| 76. BD ( 1) C 46 - C 48 | /644. BD* ( 1) N 43 - C 44 | 2.67 | 1.02 | 0.066 |
| 76. BD ( 1) C 46 - C 48 | /646. BD* ( 1) C 44 - C 46 | 1.71 | 1.25 | 0.059 |
| 76. BD ( 1) C 46 - C 48 | /655. BD* ( 1) C 48 - C 49 | 1.29 | 1.30 | 0.052 |
| 76. BD ( 1) C 46 - C 48 | /657. BD* ( 1) C 48 - H 58 | 0.31 | 1.10 | 0.024 |
| 76. BD ( 1) C 46 - C 48 | /658. BD* ( 1) C 49 - H 59 | 1.53 | 1.10 | 0.052 |
| 77. BD ( 1) C 46 - O 65 | /451. RY* ( 1) C 44        | 0.30 | 1.96 | 0.031 |
| 77. BD ( 1) C 46 - O 65 | /467. RY* ( 1) C 46        | 0.55 | 2.00 | 0.042 |
| 77. BD ( 1) C 46 - O 65 | /645. BD* ( 1) C 44 - C 45 | 1.30 | 1.28 | 0.052 |
| 77. BD ( 1) C 46 - O 65 | /646. BD* ( 1) C 44 - C 46 | 0.72 | 1.44 | 0.041 |
| 77. BD ( 1) C 46 - O 65 | /651. BD* ( 1) C 46 - C 48 | 0.29 | 1.29 | 0.025 |
| 77. BD ( 1) C 46 - O 65 | /655. BD* ( 1) C 48 - C 49 | 0.54 | 1.49 | 0.036 |
| 78. BD ( 1) C 47 - C 49 | /460. RY* ( 2) C 45        | 0.98 | 1.84 | 0.054 |
| 78. BD ( 1) C 47 - C 49 | /484. RY* ( 2) C 48        | 0.98 | 1.83 | 0.054 |
| 78. BD ( 1) C 47 - C 49 | /648. BD* ( 1) C 45 - C 47 | 1.22 | 1.29 | 0.050 |
| 78. BD ( 1) C 47 - C 49 | /650. BD* ( 1) C 45 - H 56 | 1.64 | 1.09 | 0.053 |
| 78. BD ( 1) C 47 - C 49 | /654. BD* ( 1) C 47 - H 57 | 0.29 | 1.09 | 0.022 |
| 78. BD ( 1) C 47 - C 49 | /655. BD* ( 1) C 48 - C 49 | 1.23 | 1.30 | 0.051 |
| 78. BD ( 1) C 47 - C 49 | /657. BD* ( 1) C 48 - H 58 | 1.64 | 1.10 | 0.054 |
| 78. BD ( 1) C 47 - C 49 | /658. BD* ( 1) C 49 - H 59 | 0.29 | 1.10 | 0.022 |
| 79. BD ( 1) C 47 - H 57 | /459. RY* ( 1) C 45        | 0.80 | 1.79 | 0.048 |
| 79. BD ( 1) C 47 - H 57 | /491. RY* ( 1) C 49        | 0.60 | 1.71 | 0.041 |
| 79. BD ( 1) C 47 - H 57 | /645. BD* ( 1) C 44 - C 45 | 3.06 | 0.96 | 0.068 |
| 79. BD ( 1) C 47 - H 57 | /648. BD* ( 1) C 45 - C 47 | 0.68 | 1.16 | 0.036 |
| 79. BD ( 1) C 47 - H 57 | /650. BD* ( 1) C 45 - H 56 | 0.50 | 0.96 | 0.028 |
| 79. BD ( 1) C 47 - H 57 | /655. BD* ( 1) C 48 - C 49 | 1.36 | 1.17 | 0.050 |
| 80. BD ( 1) C 48 - C 49 | /467. RY* ( 1) C 46        | 0.51 | 1.90 | 0.039 |
| 80. BD ( 1) C 48 - C 49 | /468. RY* ( 2) C 46        | 0.54 | 2.19 | 0.044 |
| 80. BD ( 1) C 48 - C 49 | /475. RY* ( 1) C 47        | 0.50 | 1.94 | 0.039 |
| 80. BD ( 1) C 48 - C 49 | /476. RY* ( 2) C 47        | 0.41 | 2.07 | 0.037 |
| 80. BD ( 1) C 48 - C 49 | /651. BD* ( 1) C 46 - C 48 | 0.98 | 1.19 | 0.043 |
| 80. BD ( 1) C 48 - C 49 | /652. BD* ( 1) C 46 - O 65 | 1.16 | 1.07 | 0.045 |
| 80. BD ( 1) C 48 - C 49 | /653. BD* ( 1) C 47 - C 49 | 1.15 | 1.21 | 0.047 |

|                         |                            |      |       |       |
|-------------------------|----------------------------|------|-------|-------|
| 80. BD ( 1) C 48 - C 49 | /654. BD* ( 1) C 47 - H 57 | 0.82 | 1.19  | 0.039 |
| 80. BD ( 1) C 48 - C 49 | /657. BD* ( 1) C 48 - H 58 | 0.91 | 1.20  | 0.042 |
| 80. BD ( 1) C 48 - C 49 | /658. BD* ( 1) C 49 - H 59 | 0.81 | 1.19  | 0.039 |
| 81. BD ( 2) C 48 - C 49 | /477. RY* ( 3) C 47        | 0.52 | 0.78  | 0.027 |
| 81. BD ( 2) C 48 - C 49 | /647. BD* ( 2) C 44 - C 46 | 5.72 | 0.29  | 0.055 |
| 81. BD ( 2) C 48 - C 49 | /649. BD* ( 2) C 45 - C 47 | 7.14 | 0.31  | 0.060 |
| 82. BD ( 1) C 48 - H 58 | /467. RY* ( 1) C 46        | 0.38 | 1.67  | 0.032 |
| 82. BD ( 1) C 48 - H 58 | /491. RY* ( 1) C 49        | 0.57 | 1.70  | 0.039 |
| 82. BD ( 1) C 48 - H 58 | /646. BD* ( 1) C 44 - C 46 | 1.58 | 1.11  | 0.053 |
| 82. BD ( 1) C 48 - H 58 | /652. BD* ( 1) C 46 - O 65 | 0.45 | 0.83  | 0.025 |
| 82. BD ( 1) C 48 - H 58 | /653. BD* ( 1) C 47 - C 49 | 2.75 | 0.97  | 0.065 |
| 82. BD ( 1) C 48 - H 58 | /655. BD* ( 1) C 48 - C 49 | 0.78 | 1.16  | 0.038 |
| 82. BD ( 1) C 48 - H 58 | /658. BD* ( 1) C 49 - H 59 | 0.48 | 0.96  | 0.027 |
| 83. BD ( 1) C 49 - H 59 | /475. RY* ( 1) C 47        | 0.59 | 1.70  | 0.040 |
| 83. BD ( 1) C 49 - H 59 | /483. RY* ( 1) C 48        | 0.83 | 1.85  | 0.050 |
| 83. BD ( 1) C 49 - H 59 | /648. BD* ( 1) C 45 - C 47 | 1.37 | 1.16  | 0.050 |
| 83. BD ( 1) C 49 - H 59 | /651. BD* ( 1) C 46 - C 48 | 2.91 | 0.96  | 0.067 |
| 83. BD ( 1) C 49 - H 59 | /655. BD* ( 1) C 48 - C 49 | 0.71 | 1.16  | 0.036 |
| 83. BD ( 1) C 49 - H 59 | /657. BD* ( 1) C 48 - H 58 | 0.47 | 0.96  | 0.027 |
| 84. BD ( 1) O 50 - H 60 | /355. RY* ( 1) C 32        | 0.90 | 1.64  | 0.049 |
| 84. BD ( 1) O 50 - H 60 | /356. RY* ( 2) C 32        | 0.60 | 1.51  | 0.038 |
| 84. BD ( 1) O 50 - H 60 | /623. BD* ( 1) C 32 - C 34 | 1.61 | 1.34  | 0.059 |
| 109. CR ( 1) C 32       | /364. RY* ( 2) C 33        | 0.56 | 11.81 | 0.102 |
| 109. CR ( 1) C 32       | /373. RY* ( 3) C 34        | 1.07 | 11.48 | 0.140 |
| 109. CR ( 1) C 32       | /623. BD* ( 1) C 32 - C 34 | 0.91 | 10.74 | 0.125 |
| 109. CR ( 1) C 32       | /624. BD* ( 1) C 32 - O 50 | 0.67 | 10.39 | 0.106 |
| 109. CR ( 1) C 32       | /625. BD* ( 1) C 33 - C 35 | 0.29 | 10.75 | 0.071 |
| 109. CR ( 1) C 32       | /626. BD* ( 1) C 33 - C 38 | 0.31 | 10.57 | 0.073 |
| 109. CR ( 1) C 32       | /627. BD* ( 1) C 34 - C 36 | 0.41 | 10.58 | 0.083 |
| 110. CR ( 1) C 33       | /355. RY* ( 1) C 32        | 0.25 | 10.97 | 0.067 |
| 110. CR ( 1) C 33       | /381. RY* ( 3) C 35        | 1.14 | 11.63 | 0.145 |
| 110. CR ( 1) C 33       | /405. RY* ( 3) C 38        | 0.51 | 11.20 | 0.096 |
| 110. CR ( 1) C 33       | /623. BD* ( 1) C 32 - C 34 | 0.28 | 10.67 | 0.069 |
| 110. CR ( 1) C 33       | /625. BD* ( 1) C 33 - C 35 | 0.61 | 10.68 | 0.103 |
| 110. CR ( 1) C 33       | /629. BD* ( 1) C 35 - C 37 | 0.54 | 10.51 | 0.097 |
| 110. CR ( 1) C 33       | /630. BD* ( 1) C 35 - C 40 | 0.49 | 10.52 | 0.091 |
| 110. CR ( 1) C 33       | /634. BD* ( 1) C 38 - C 39 | 0.27 | 10.71 | 0.068 |
| 111. CR ( 1) C 34       | /357. RY* ( 3) C 32        | 1.49 | 11.48 | 0.165 |
| 111. CR ( 1) C 34       | /390. RY* ( 4) C 36        | 0.49 | 11.17 | 0.093 |
| 111. CR ( 1) C 34       | /508. RY* ( 2) H 51        | 0.29 | 12.28 | 0.075 |
| 111. CR ( 1) C 34       | /621. BD* ( 1) C 32 - C 33 | 0.60 | 10.47 | 0.101 |
| 111. CR ( 1) C 34       | /623. BD* ( 1) C 32 - C 34 | 0.29 | 10.66 | 0.071 |
| 111. CR ( 1) C 34       | /624. BD* ( 1) C 32 - O 50 | 0.36 | 10.32 | 0.078 |
| 111. CR ( 1) C 34       | /631. BD* ( 1) C 36 - C 37 | 0.30 | 10.68 | 0.072 |
| 112. CR ( 1) C 35       | /365. RY* ( 3) C 33        | 1.22 | 11.50 | 0.150 |
| 112. CR ( 1) C 35       | /397. RY* ( 3) C 37        | 0.75 | 11.19 | 0.116 |
| 112. CR ( 1) C 35       | /421. RY* ( 3) C 40        | 0.59 | 11.17 | 0.103 |
| 112. CR ( 1) C 35       | /621. BD* ( 1) C 32 - C 33 | 0.51 | 10.47 | 0.094 |
| 112. CR ( 1) C 35       | /625. BD* ( 1) C 33 - C 35 | 0.51 | 10.67 | 0.093 |
| 112. CR ( 1) C 35       | /626. BD* ( 1) C 33 - C 38 | 0.46 | 10.50 | 0.089 |
| 112. CR ( 1) C 35       | /631. BD* ( 1) C 36 - C 37 | 0.32 | 10.69 | 0.075 |
| 112. CR ( 1) C 35       | /639. BD* ( 1) C 40 - C 41 | 0.28 | 10.71 | 0.070 |
| 113. CR ( 1) C 36       | /396. RY* ( 2) C 37        | 0.40 | 11.13 | 0.084 |
| 113. CR ( 1) C 36       | /397. RY* ( 3) C 37        | 0.87 | 11.17 | 0.125 |
| 113. CR ( 1) C 36       | /398. RY* ( 4) C 37        | 0.50 | 11.09 | 0.094 |
| 113. CR ( 1) C 36       | /528. RY* ( 2) H 61        | 0.26 | 12.34 | 0.072 |
| 113. CR ( 1) C 36       | /623. BD* ( 1) C 32 - C 34 | 0.29 | 10.64 | 0.070 |
| 113. CR ( 1) C 36       | /629. BD* ( 1) C 35 - C 37 | 0.64 | 10.49 | 0.105 |
| 113. CR ( 1) C 36       | /631. BD* ( 1) C 36 - C 37 | 0.46 | 10.67 | 0.089 |
| 113. CR ( 1) C 36       | /633. BD* ( 1) C 37 - N 42 | 0.43 | 10.42 | 0.085 |
| 114. CR ( 1) C 37       | /380. RY* ( 2) C 35        | 0.61 | 11.68 | 0.107 |
| 114. CR ( 1) C 37       | /389. RY* ( 3) C 36        | 1.13 | 11.30 | 0.142 |
| 114. CR ( 1) C 37       | /625. BD* ( 1) C 33 - C 35 | 0.35 | 10.70 | 0.078 |
| 114. CR ( 1) C 37       | /627. BD* ( 1) C 34 - C 36 | 0.44 | 10.54 | 0.087 |
| 114. CR ( 1) C 37       | /630. BD* ( 1) C 35 - C 40 | 0.32 | 10.54 | 0.074 |
| 114. CR ( 1) C 37       | /631. BD* ( 1) C 36 - C 37 | 0.67 | 10.71 | 0.108 |
| 114. CR ( 1) C 37       | /643. BD* ( 1) N 42 - N 43 | 0.38 | 10.59 | 0.081 |
| 115. CR ( 1) C 38       | /364. RY* ( 2) C 33        | 0.29 | 11.72 | 0.074 |
| 115. CR ( 1) C 38       | /413. RY* ( 3) C 39        | 1.04 | 11.39 | 0.137 |
| 115. CR ( 1) C 38       | /510. RY* ( 2) H 52        | 0.27 | 12.26 | 0.073 |
| 115. CR ( 1) C 38       | /621. BD* ( 1) C 32 - C 33 | 0.33 | 10.45 | 0.075 |

|                   |                            |      |       |       |
|-------------------|----------------------------|------|-------|-------|
| 115. CR ( 1) C 38 | /625. BD* ( 1) C 33 - C 35 | 0.36 | 10.65 | 0.078 |
| 115. CR ( 1) C 38 | /634. BD* ( 1) C 38 - C 39 | 0.39 | 10.68 | 0.082 |
| 115. CR ( 1) C 38 | /637. BD* ( 1) C 39 - C 41 | 0.49 | 10.50 | 0.091 |
| 116. CR ( 1) C 39 | /404. RY* ( 2) C 38        | 0.34 | 11.26 | 0.078 |
| 116. CR ( 1) C 39 | /405. RY* ( 3) C 38        | 0.65 | 11.17 | 0.107 |
| 116. CR ( 1) C 39 | /406. RY* ( 4) C 38        | 0.40 | 11.07 | 0.084 |
| 116. CR ( 1) C 39 | /429. RY* ( 3) C 41        | 0.38 | 11.40 | 0.083 |
| 116. CR ( 1) C 39 | /512. RY* ( 2) H 53        | 0.33 | 12.30 | 0.080 |
| 116. CR ( 1) C 39 | /626. BD* ( 1) C 33 - C 38 | 0.60 | 10.48 | 0.101 |
| 116. CR ( 1) C 39 | /634. BD* ( 1) C 38 - C 39 | 0.39 | 10.68 | 0.082 |
| 116. CR ( 1) C 39 | /639. BD* ( 1) C 40 - C 41 | 0.29 | 10.69 | 0.070 |
| 117. CR ( 1) C 40 | /381. RY* ( 3) C 35        | 0.38 | 11.59 | 0.084 |
| 117. CR ( 1) C 40 | /429. RY* ( 3) C 41        | 1.05 | 11.39 | 0.138 |
| 117. CR ( 1) C 40 | /625. BD* ( 1) C 33 - C 35 | 0.41 | 10.64 | 0.084 |
| 117. CR ( 1) C 40 | /629. BD* ( 1) C 35 - C 37 | 0.34 | 10.47 | 0.076 |
| 117. CR ( 1) C 40 | /637. BD* ( 1) C 39 - C 41 | 0.50 | 10.49 | 0.092 |
| 117. CR ( 1) C 40 | /639. BD* ( 1) C 40 - C 41 | 0.39 | 10.68 | 0.082 |
| 118. CR ( 1) C 41 | /413. RY* ( 3) C 39        | 0.38 | 11.38 | 0.083 |
| 118. CR ( 1) C 41 | /420. RY* ( 2) C 40        | 0.33 | 11.18 | 0.077 |
| 118. CR ( 1) C 41 | /421. RY* ( 3) C 40        | 0.45 | 11.14 | 0.090 |
| 118. CR ( 1) C 41 | /422. RY* ( 4) C 40        | 0.65 | 11.11 | 0.107 |
| 118. CR ( 1) C 41 | /516. RY* ( 2) H 55        | 0.32 | 12.30 | 0.080 |
| 118. CR ( 1) C 41 | /630. BD* ( 1) C 35 - C 40 | 0.61 | 10.48 | 0.102 |
| 118. CR ( 1) C 41 | /634. BD* ( 1) C 38 - C 39 | 0.29 | 10.67 | 0.070 |
| 118. CR ( 1) C 41 | /639. BD* ( 1) C 40 - C 41 | 0.43 | 10.68 | 0.086 |
| 119. CR ( 1) N 42 | /395. RY* ( 1) C 37        | 0.43 | 15.09 | 0.102 |
| 119. CR ( 1) N 42 | /396. RY* ( 2) C 37        | 0.71 | 15.28 | 0.132 |
| 119. CR ( 1) N 42 | /445. RY* ( 3) N 43        | 0.87 | 15.28 | 0.145 |
| 119. CR ( 1) N 42 | /629. BD* ( 1) C 35 - C 37 | 0.29 | 14.64 | 0.083 |
| 119. CR ( 1) N 42 | /631. BD* ( 1) C 36 - C 37 | 0.27 | 14.82 | 0.081 |
| 119. CR ( 1) N 42 | /644. BD* ( 1) N 43 - C 44 | 0.70 | 14.56 | 0.129 |
| 120. CR ( 1) N 43 | /437. RY* ( 3) N 42        | 1.01 | 15.44 | 0.158 |
| 120. CR ( 1) N 43 | /451. RY* ( 1) C 44        | 0.73 | 15.34 | 0.134 |
| 120. CR ( 1) N 43 | /452. RY* ( 2) C 44        | 0.34 | 15.61 | 0.092 |
| 120. CR ( 1) N 43 | /633. BD* ( 1) C 37 - N 42 | 0.62 | 14.60 | 0.121 |
| 120. CR ( 1) N 43 | /646. BD* ( 1) C 44 - C 46 | 0.37 | 14.82 | 0.095 |
| 121. CR ( 1) C 44 | /460. RY* ( 2) C 45        | 0.50 | 11.30 | 0.095 |
| 121. CR ( 1) C 44 | /467. RY* ( 1) C 46        | 0.53 | 11.26 | 0.097 |
| 121. CR ( 1) C 44 | /468. RY* ( 2) C 46        | 1.11 | 11.55 | 0.143 |
| 121. CR ( 1) C 44 | /643. BD* ( 1) N 42 - N 43 | 0.47 | 10.61 | 0.090 |
| 121. CR ( 1) C 44 | /646. BD* ( 1) C 44 - C 46 | 0.61 | 10.71 | 0.103 |
| 121. CR ( 1) C 44 | /648. BD* ( 1) C 45 - C 47 | 0.29 | 10.75 | 0.070 |
| 121. CR ( 1) C 44 | /651. BD* ( 1) C 46 - C 48 | 0.49 | 10.55 | 0.092 |
| 121. CR ( 1) C 44 | /652. BD* ( 1) C 46 - O 65 | 0.40 | 10.43 | 0.083 |
| 122. CR ( 1) C 45 | /451. RY* ( 1) C 44        | 0.38 | 11.16 | 0.082 |
| 122. CR ( 1) C 45 | /453. RY* ( 3) C 44        | 0.31 | 10.93 | 0.073 |
| 122. CR ( 1) C 45 | /476. RY* ( 2) C 47        | 1.05 | 11.37 | 0.138 |
| 122. CR ( 1) C 45 | /518. RY* ( 2) H 56        | 0.31 | 12.30 | 0.078 |
| 122. CR ( 1) C 45 | /644. BD* ( 1) N 43 - C 44 | 0.26 | 10.41 | 0.066 |
| 122. CR ( 1) C 45 | /646. BD* ( 1) C 44 - C 46 | 0.39 | 10.64 | 0.083 |
| 122. CR ( 1) C 45 | /648. BD* ( 1) C 45 - C 47 | 0.43 | 10.69 | 0.086 |
| 122. CR ( 1) C 45 | /653. BD* ( 1) C 47 - C 49 | 0.52 | 10.51 | 0.094 |
| 123. CR ( 1) C 46 | /452. RY* ( 2) C 44        | 1.53 | 11.51 | 0.168 |
| 123. CR ( 1) C 46 | /484. RY* ( 2) C 48        | 0.53 | 11.30 | 0.098 |
| 123. CR ( 1) C 46 | /644. BD* ( 1) N 43 - C 44 | 0.45 | 10.48 | 0.088 |
| 123. CR ( 1) C 46 | /645. BD* ( 1) C 44 - C 45 | 0.50 | 10.56 | 0.092 |
| 123. CR ( 1) C 46 | /646. BD* ( 1) C 44 - C 46 | 0.75 | 10.72 | 0.115 |
| 123. CR ( 1) C 46 | /652. BD* ( 1) C 46 - O 65 | 0.42 | 10.44 | 0.085 |
| 123. CR ( 1) C 46 | /655. BD* ( 1) C 48 - C 49 | 0.30 | 10.77 | 0.072 |
| 124. CR ( 1) C 47 | /459. RY* ( 1) C 45        | 0.40 | 11.31 | 0.085 |
| 124. CR ( 1) C 47 | /460. RY* ( 2) C 45        | 0.80 | 11.23 | 0.119 |
| 124. CR ( 1) C 47 | /492. RY* ( 2) C 49        | 0.47 | 11.38 | 0.093 |
| 124. CR ( 1) C 47 | /520. RY* ( 2) H 57        | 0.33 | 12.00 | 0.079 |
| 124. CR ( 1) C 47 | /645. BD* ( 1) C 44 - C 45 | 0.57 | 10.48 | 0.098 |
| 124. CR ( 1) C 47 | /648. BD* ( 1) C 45 - C 47 | 0.38 | 10.69 | 0.080 |
| 124. CR ( 1) C 47 | /655. BD* ( 1) C 48 - C 49 | 0.30 | 10.69 | 0.072 |
| 125. CR ( 1) C 48 | /468. RY* ( 2) C 46        | 0.55 | 11.48 | 0.101 |
| 125. CR ( 1) C 48 | /469. RY* ( 3) C 46        | 0.32 | 10.96 | 0.074 |
| 125. CR ( 1) C 48 | /492. RY* ( 2) C 49        | 1.04 | 11.38 | 0.137 |
| 125. CR ( 1) C 48 | /522. RY* ( 2) H 58        | 0.27 | 12.33 | 0.073 |
| 125. CR ( 1) C 48 | /646. BD* ( 1) C 44 - C 46 | 0.43 | 10.64 | 0.087 |

|                           |                            |        |       |       |
|---------------------------|----------------------------|--------|-------|-------|
| 125. CR ( 1) C 48         | /653. BD* ( 1) C 47 - C 49 | 0.53   | 10.50 | 0.095 |
| 125. CR ( 1) C 48         | /655. BD* ( 1) C 48 - C 49 | 0.44   | 10.69 | 0.087 |
| 126. CR ( 1) C 49         | /476. RY* ( 2) C 47        | 0.47   | 11.37 | 0.092 |
| 126. CR ( 1) C 49         | /483. RY* ( 1) C 48        | 0.47   | 11.37 | 0.092 |
| 126. CR ( 1) C 49         | /484. RY* ( 2) C 48        | 0.80   | 11.22 | 0.119 |
| 126. CR ( 1) C 49         | /524. RY* ( 2) H 59        | 0.30   | 11.95 | 0.076 |
| 126. CR ( 1) C 49         | /648. BD* ( 1) C 45 - C 47 | 0.30   | 10.68 | 0.072 |
| 126. CR ( 1) C 49         | /651. BD* ( 1) C 46 - C 48 | 0.52   | 10.48 | 0.094 |
| 126. CR ( 1) C 49         | /655. BD* ( 1) C 48 - C 49 | 0.39   | 10.69 | 0.082 |
| 127. CR ( 1) O 50         | /355. RY* ( 1) C 32        | 0.76   | 19.88 | 0.156 |
| 127. CR ( 1) O 50         | /356. RY* ( 2) C 32        | 0.33   | 19.75 | 0.101 |
| 127. CR ( 1) O 50         | /526. RY* ( 2) H 60        | 0.31   | 20.89 | 0.101 |
| 127. CR ( 1) O 50         | /621. BD* ( 1) C 32 - C 33 | 0.25   | 19.39 | 0.089 |
| 129. CR ( 1) O 65         | /467. RY* ( 1) C 46        | 1.46   | 20.05 | 0.216 |
| 129. CR ( 1) O 65         | /646. BD* ( 1) C 44 - C 46 | 0.32   | 19.50 | 0.101 |
| 151. LP ( 1) N 42         | / 54. BD* ( 2) C 35 - C 37 | 0.87   | 0.25  | 0.025 |
| 151. LP ( 1) N 42         | /443. RY* ( 1) N 43        | 0.50   | 1.16  | 0.031 |
| 151. LP ( 1) N 42         | /444. RY* ( 2) N 43        | 1.11   | 1.10  | 0.045 |
| 151. LP ( 1) N 42         | /627. BD* ( 1) C 34 - C 36 | 0.27   | 0.75  | 0.018 |
| 151. LP ( 1) N 42         | /629. BD* ( 1) C 35 - C 37 | 3.09   | 0.74  | 0.061 |
| 151. LP ( 1) N 42         | /631. BD* ( 1) C 36 - C 37 | 3.31   | 0.92  | 0.071 |
| 152. LP ( 2) N 42         | / 54. BD* ( 2) C 35 - C 37 | 2.21   | 0.40  | 0.050 |
| 152. LP ( 2) N 42         | /395. RY* ( 1) C 37        | 0.73   | 1.34  | 0.041 |
| 152. LP ( 2) N 42         | /435. RY* ( 1) N 42        | 1.62   | 2.34  | 0.080 |
| 152. LP ( 2) N 42         | /436. RY* ( 2) N 42        | 0.30   | 1.39  | 0.027 |
| 152. LP ( 2) N 42         | /437. RY* ( 3) N 42        | 0.61   | 1.67  | 0.041 |
| 152. LP ( 2) N 42         | /444. RY* ( 2) N 43        | 0.35   | 1.26  | 0.027 |
| 152. LP ( 2) N 42         | /541. RY* ( 1) O 65        | 0.57   | 2.83  | 0.052 |
| 152. LP ( 2) N 42         | /629. BD* ( 1) C 35 - C 37 | 1.73   | 0.89  | 0.050 |
| 153. LP ( 1) N 43         | /437. RY* ( 3) N 42        | 0.42   | 1.63  | 0.033 |
| 153. LP ( 1) N 43         | /451. RY* ( 1) C 44        | 0.96   | 1.53  | 0.049 |
| 153. LP ( 1) N 43         | /645. BD* ( 1) C 44 - C 45 | 0.54   | 0.85  | 0.027 |
| 153. LP ( 1) N 43         | /646. BD* ( 1) C 44 - C 46 | 3.76   | 1.01  | 0.078 |
| 154. LP ( 2) N 43         | /436. RY* ( 2) N 42        | 0.96   | 1.22  | 0.045 |
| 154. LP ( 2) N 43         | /454. RY* ( 4) C 44        | 0.32   | 0.92  | 0.023 |
| 154. LP ( 2) N 43         | /647. BD* ( 2) C 44 - C 46 | 15.70  | 0.29  | 0.091 |
| 155. LP ( 1) O 50         | /355. RY* ( 1) C 32        | 0.97   | 1.52  | 0.049 |
| 155. LP ( 1) O 50         | /356. RY* ( 2) C 32        | 0.51   | 1.39  | 0.034 |
| 155. LP ( 1) O 50         | /621. BD* ( 1) C 32 - C 33 | 3.24   | 1.02  | 0.073 |
| 156. LP ( 2) O 50         | /622. BD* ( 2) C 32 - C 33 | 7.52   | 0.29  | 0.080 |
| 159. LP ( 1) O 65         | /467. RY* ( 1) C 46        | 1.23   | 1.73  | 0.059 |
| 159. LP ( 1) O 65         | /646. BD* ( 1) C 44 - C 46 | 3.45   | 1.17  | 0.080 |
| 160. LP ( 2) O 65         | /435. RY* ( 1) N 42        | 0.30   | 2.35  | 0.034 |
| 160. LP ( 2) O 65         | /467. RY* ( 1) C 46        | 0.66   | 1.62  | 0.042 |
| 160. LP ( 2) O 65         | /541. RY* ( 1) O 65        | 0.81   | 2.85  | 0.062 |
| 160. LP ( 2) O 65         | /646. BD* ( 1) C 44 - C 46 | 0.53   | 1.06  | 0.030 |
| 160. LP ( 2) O 65         | /651. BD* ( 1) C 46 - C 48 | 3.94   | 0.91  | 0.076 |
| 161. LP ( 3) O 65         | /647. BD* ( 2) C 44 - C 46 | 12.34  | 0.33  | 0.087 |
| 622. BD* ( 2) C 32 - C 33 | / 54. BD* ( 2) C 35 - C 37 | 400.09 | 0.01  | 0.082 |
| 622. BD* ( 2) C 32 - C 33 | /356. RY* ( 2) C 32        | 0.50   | 0.83  | 0.037 |
| 622. BD* ( 2) C 32 - C 33 | /363. RY* ( 1) C 33        | 0.88   | 0.63  | 0.043 |
| 622. BD* ( 2) C 32 - C 33 | /371. RY* ( 1) C 34        | 1.02   | 0.54  | 0.042 |
| 622. BD* ( 2) C 32 - C 33 | /379. RY* ( 1) C 35        | 0.56   | 0.64  | 0.034 |
| 622. BD* ( 2) C 32 - C 33 | /403. RY* ( 1) C 38        | 0.35   | 0.58  | 0.026 |
| 622. BD* ( 2) C 32 - C 33 | /499. RY* ( 1) O 50        | 0.36   | 0.92  | 0.033 |
| 622. BD* ( 2) C 32 - C 33 | /635. BD* ( 2) C 38 - C 39 | 41.03  | 0.07  | 0.075 |
| 635. BD* ( 2) C 38 - C 39 | /403. RY* ( 1) C 38        | 2.27   | 0.52  | 0.076 |
| 635. BD* ( 2) C 38 - C 39 | /411. RY* ( 1) C 39        | 2.04   | 0.47  | 0.069 |
| 640. BD* ( 2) C 40 - C 41 | /419. RY* ( 1) C 40        | 1.78   | 0.61  | 0.073 |
| 640. BD* ( 2) C 40 - C 41 | /427. RY* ( 1) C 41        | 2.15   | 0.47  | 0.071 |
| 647. BD* ( 2) C 44 - C 46 | /454. RY* ( 4) C 44        | 0.75   | 0.63  | 0.058 |
| 647. BD* ( 2) C 44 - C 46 | /470. RY* ( 4) C 46        | 0.55   | 0.74  | 0.054 |
| 647. BD* ( 2) C 44 - C 46 | /649. BD* ( 2) C 45 - C 47 | 62.76  | 0.02  | 0.071 |
| 647. BD* ( 2) C 44 - C 46 | /656. BD* ( 2) C 48 - C 49 | 55.32  | 0.02  | 0.073 |
| 649. BD* ( 2) C 45 - C 47 | /461. RY* ( 3) C 45        | 0.88   | 0.51  | 0.075 |
| 649. BD* ( 2) C 45 - C 47 | /477. RY* ( 3) C 47        | 0.93   | 0.47  | 0.074 |
| 656. BD* ( 2) C 48 - C 49 | /485. RY* ( 3) C 48        | 1.02   | 0.51  | 0.078 |
| 656. BD* ( 2) C 48 - C 49 | /493. RY* ( 3) C 49        | 0.98   | 0.46  | 0.073 |
| from unit 2 to unit 3     |                            |        |       |       |
| 50. BD* ( 2) C 34 - C 36  | /660. BD* ( 1) O 62 - H 63 | 0.05   | 0.39  | 0.007 |

|                         |                            |      |      |       |
|-------------------------|----------------------------|------|------|-------|
| 56. BD ( 1) C 36 - C 37 | /532. RY* ( 4) O 62        | 0.03 | 2.13 | 0.010 |
| 68. BD ( 1) N 42 - N 43 | /529. RY* ( 1) O 62        | 0.03 | 3.00 | 0.012 |
| 69. BD ( 1) N 43 - C 44 | /529. RY* ( 1) O 62        | 0.04 | 2.81 | 0.014 |
| 151. LP ( 1) N 42       | /529. RY* ( 1) O 62        | 0.06 | 2.32 | 0.015 |
| 152. LP ( 2) N 42       | /529. RY* ( 1) O 62        | 0.99 | 2.47 | 0.064 |
| 152. LP ( 2) N 42       | /531. RY* ( 3) O 62        | 0.15 | 1.80 | 0.021 |
| 152. LP ( 2) N 42       | /532. RY* ( 4) O 62        | 0.35 | 1.81 | 0.032 |
| 152. LP ( 2) N 42       | /537. RY* ( 1) H 63        | 0.32 | 1.00 | 0.023 |
| 152. LP ( 2) N 42       | /539. RY* ( 1) H 64        | 0.24 | 1.01 | 0.020 |
| 159. LP ( 1) O 65       | /529. RY* ( 1) O 62        | 0.17 | 2.60 | 0.027 |
| 159. LP ( 1) O 65       | /531. RY* ( 3) O 62        | 0.04 | 1.93 | 0.011 |
| 159. LP ( 1) O 65       | /532. RY* ( 4) O 62        | 0.07 | 1.93 | 0.015 |
| 159. LP ( 1) O 65       | /537. RY* ( 1) H 63        | 0.06 | 1.12 | 0.011 |
| 159. LP ( 1) O 65       | /539. RY* ( 1) H 64        | 0.06 | 1.13 | 0.010 |
| 160. LP ( 2) O 65       | /529. RY* ( 1) O 62        | 0.39 | 2.49 | 0.040 |
| 160. LP ( 2) O 65       | /531. RY* ( 3) O 62        | 0.13 | 1.82 | 0.020 |
| 160. LP ( 2) O 65       | /532. RY* ( 4) O 62        | 0.20 | 1.82 | 0.024 |
| 160. LP ( 2) O 65       | /537. RY* ( 1) H 63        | 0.14 | 1.01 | 0.015 |
| 160. LP ( 2) O 65       | /539. RY* ( 1) H 64        | 0.10 | 1.02 | 0.013 |
| 160. LP ( 2) O 65       | /660. BD* ( 1) O 62 - H 63 | 0.03 | 0.79 | 0.006 |
| 161. LP ( 3) O 65       | /529. RY* ( 1) O 62        | 0.10 | 2.34 | 0.020 |
| 161. LP ( 3) O 65       | /531. RY* ( 3) O 62        | 0.03 | 1.67 | 0.010 |
| 161. LP ( 3) O 65       | /532. RY* ( 4) O 62        | 0.06 | 1.67 | 0.013 |

from unit 2 to unit 4

|                           |                            |      |      |       |
|---------------------------|----------------------------|------|------|-------|
| 52. BD ( 1) C 35 - C 37   | /551. RY* ( 1) H 67        | 0.03 | 1.28 | 0.008 |
| 53. BD ( 2) C 35 - C 37   | /663. BD* ( 1) H 67 - O 68 | 0.17 | 0.61 | 0.013 |
| 66. BD ( 1) C 40 - H 54   | /662. BD* ( 1) H 66 - O 68 | 0.03 | 0.85 | 0.006 |
| 68. BD ( 1) N 42 - N 43   | /553. RY* ( 1) O 68        | 0.03 | 2.90 | 0.011 |
| 69. BD ( 1) N 43 - C 44   | /553. RY* ( 1) O 68        | 0.03 | 2.70 | 0.012 |
| 151. LP ( 1) N 42         | /553. RY* ( 1) O 68        | 0.03 | 2.22 | 0.011 |
| 152. LP ( 2) N 42         | /549. RY* ( 1) H 66        | 0.37 | 1.14 | 0.027 |
| 152. LP ( 2) N 42         | /551. RY* ( 1) H 67        | 0.41 | 1.07 | 0.027 |
| 152. LP ( 2) N 42         | /553. RY* ( 1) O 68        | 0.90 | 2.37 | 0.060 |
| 152. LP ( 2) N 42         | /556. RY* ( 4) O 68        | 0.35 | 2.25 | 0.036 |
| 152. LP ( 2) N 42         | /662. BD* ( 1) H 66 - O 68 | 0.03 | 0.78 | 0.007 |
| 152. LP ( 2) N 42         | /663. BD* ( 1) H 67 - O 68 | 0.08 | 0.78 | 0.010 |
| 159. LP ( 1) O 65         | /549. RY* ( 1) H 66        | 0.07 | 1.26 | 0.012 |
| 159. LP ( 1) O 65         | /551. RY* ( 1) H 67        | 0.12 | 1.20 | 0.015 |
| 159. LP ( 1) O 65         | /553. RY* ( 1) O 68        | 0.20 | 2.50 | 0.029 |
| 159. LP ( 1) O 65         | /556. RY* ( 4) O 68        | 0.07 | 2.37 | 0.016 |
| 160. LP ( 2) O 65         | /549. RY* ( 1) H 66        | 0.15 | 1.15 | 0.017 |
| 160. LP ( 2) O 65         | /551. RY* ( 1) H 67        | 0.23 | 1.09 | 0.020 |
| 160. LP ( 2) O 65         | /553. RY* ( 1) O 68        | 0.49 | 2.39 | 0.044 |
| 160. LP ( 2) O 65         | /556. RY* ( 4) O 68        | 0.21 | 2.26 | 0.028 |
| 161. LP ( 3) O 65         | /549. RY* ( 1) H 66        | 0.12 | 1.00 | 0.015 |
| 161. LP ( 3) O 65         | /553. RY* ( 1) O 68        | 0.12 | 2.24 | 0.021 |
| 161. LP ( 3) O 65         | /556. RY* ( 4) O 68        | 0.04 | 2.11 | 0.011 |
| 161. LP ( 3) O 65         | /662. BD* ( 1) H 66 - O 68 | 0.13 | 0.64 | 0.012 |
| 640. BD* ( 2) C 40 - C 41 | /662. BD* ( 1) H 66 - O 68 | 0.07 | 0.32 | 0.011 |

from unit 2 to unit 5

|                         |                       |      |      |       |
|-------------------------|-----------------------|------|------|-------|
| 52. BD ( 1) C 35 - C 37 | /166. LP ( 6) Mn 69   | 0.07 | 1.42 | 0.014 |
| 52. BD ( 1) C 35 - C 37 | /167. LP* ( 7) Mn 69  | 0.03 | 1.19 | 0.007 |
| 53. BD ( 2) C 35 - C 37 | /561. RY* ( 1) Mn 69  | 0.03 | 2.07 | 0.010 |
| 56. BD ( 1) C 36 - C 37 | /167. LP* ( 7) Mn 69  | 0.03 | 1.31 | 0.008 |
| 56. BD ( 1) C 36 - C 37 | /561. RY* ( 1) Mn 69  | 0.05 | 2.56 | 0.014 |
| 56. BD ( 1) C 36 - C 37 | /570. RY* ( 10) Mn 69 | 0.03 | 9.53 | 0.021 |
| 58. BD ( 1) C 37 - N 42 | /166. LP ( 6) Mn 69   | 0.60 | 1.54 | 0.041 |
| 58. BD ( 1) C 37 - N 42 | /167. LP* ( 7) Mn 69  | 0.05 | 1.32 | 0.010 |
| 58. BD ( 1) C 37 - N 42 | /168. LP* ( 8) Mn 69  | 0.06 | 2.61 | 0.016 |
| 58. BD ( 1) C 37 - N 42 | /169. LP* ( 9) Mn 69  | 0.04 | 2.53 | 0.013 |
| 58. BD ( 1) C 37 - N 42 | /566. RY* ( 6) Mn 69  | 0.05 | 2.54 | 0.014 |
| 58. BD ( 1) C 37 - N 42 | /567. RY* ( 7) Mn 69  | 0.03 | 2.79 | 0.011 |
| 58. BD ( 1) C 37 - N 42 | /568. RY* ( 8) Mn 69  | 0.06 | 7.46 | 0.027 |
| 68. BD ( 1) N 42 - N 43 | /166. LP ( 6) Mn 69   | 0.78 | 1.74 | 0.050 |
| 68. BD ( 1) N 42 - N 43 | /167. LP* ( 7) Mn 69  | 0.04 | 1.51 | 0.009 |
| 68. BD ( 1) N 42 - N 43 | /169. LP* ( 9) Mn 69  | 0.13 | 2.72 | 0.024 |
| 68. BD ( 1) N 42 - N 43 | /561. RY* ( 1) Mn 69  | 0.03 | 2.77 | 0.011 |
| 68. BD ( 1) N 42 - N 43 | /562. RY* ( 2) Mn 69  | 0.15 | 3.96 | 0.031 |
| 68. BD ( 1) N 42 - N 43 | /565. RY* ( 5) Mn 69  | 0.04 | 2.78 | 0.013 |



|      |    |   |    |   |    |   |   |    |       |     |   |     |    |    |       |        |       |
|------|----|---|----|---|----|---|---|----|-------|-----|---|-----|----|----|-------|--------|-------|
| 68.  | BD | ( | 1) | N | 42 | - | N | 43 | /568. | RY* | ( | 8)  | Mn | 69 | 0.03  | 7.66   | 0.019 |
| 68.  | BD | ( | 1) | N | 42 | - | N | 43 | /570. | RY* | ( | 10) | Mn | 69 | 0.04  | 9.74   | 0.025 |
| 68.  | BD | ( | 1) | N | 42 | - | N | 43 | /580. | RY* | ( | 20) | Mn | 69 | 0.03  | 149.94 | 0.089 |
| 68.  | BD | ( | 1) | N | 42 | - | N | 43 | /581. | RY* | ( | 21) | Mn | 69 | 0.05  | 39.35  | 0.058 |
| 69.  | BD | ( | 1) | N | 43 | - | C | 44 | /166. | LP  | ( | 6)  | Mn | 69 | 0.12  | 1.54   | 0.018 |
| 69.  | BD | ( | 1) | N | 43 | - | C | 44 | /167. | LP* | ( | 7)  | Mn | 69 | 0.04  | 1.32   | 0.010 |
| 69.  | BD | ( | 1) | N | 43 | - | C | 44 | /561. | RY* | ( | 1)  | Mn | 69 | 0.04  | 2.57   | 0.014 |
| 69.  | BD | ( | 1) | N | 43 | - | C | 44 | /562. | RY* | ( | 2)  | Mn | 69 | 0.09  | 3.77   | 0.023 |
| 69.  | BD | ( | 1) | N | 43 | - | C | 44 | /570. | RY* | ( | 10) | Mn | 69 | 0.09  | 9.54   | 0.036 |
| 69.  | BD | ( | 1) | N | 43 | - | C | 44 | /578. | RY* | ( | 18) | Mn | 69 | 0.04  | 679.51 | 0.197 |
| 69.  | BD | ( | 1) | N | 43 | - | C | 44 | /580. | RY* | ( | 20) | Mn | 69 | 0.07  | 149.75 | 0.126 |
| 69.  | BD | ( | 1) | N | 43 | - | C | 44 | /581. | RY* | ( | 21) | Mn | 69 | 0.12  | 39.15  | 0.088 |
| 70.  | BD | ( | 1) | C | 44 | - | C | 45 | /166. | LP  | ( | 6)  | Mn | 69 | 0.03  | 1.42   | 0.008 |
| 71.  | BD | ( | 1) | C | 44 | - | C | 46 | /166. | LP  | ( | 6)  | Mn | 69 | 0.13  | 1.53   | 0.019 |
| 71.  | BD | ( | 1) | C | 44 | - | C | 46 | /167. | LP* | ( | 7)  | Mn | 69 | 0.03  | 1.31   | 0.008 |
| 71.  | BD | ( | 1) | C | 44 | - | C | 46 | /562. | RY* | ( | 2)  | Mn | 69 | 0.03  | 3.76   | 0.013 |
| 71.  | BD | ( | 1) | C | 44 | - | C | 46 | /581. | RY* | ( | 21) | Mn | 69 | 0.03  | 39.14  | 0.044 |
| 76.  | BD | ( | 1) | C | 46 | - | C | 48 | /166. | LP  | ( | 6)  | Mn | 69 | 0.19  | 1.41   | 0.022 |
| 76.  | BD | ( | 1) | C | 46 | - | C | 48 | /167. | LP* | ( | 7)  | Mn | 69 | 0.06  | 1.19   | 0.010 |
| 76.  | BD | ( | 1) | C | 46 | - | C | 48 | /562. | RY* | ( | 2)  | Mn | 69 | 0.03  | 3.64   | 0.014 |
| 76.  | BD | ( | 1) | C | 46 | - | C | 48 | /581. | RY* | ( | 21) | Mn | 69 | 0.03  | 39.02  | 0.045 |
| 77.  | BD | ( | 1) | C | 46 | - | O | 65 | /166. | LP  | ( | 6)  | Mn | 69 | 0.67  | 1.60   | 0.044 |
| 77.  | BD | ( | 1) | C | 46 | - | O | 65 | /168. | LP* | ( | 8)  | Mn | 69 | 0.09  | 2.67   | 0.020 |
| 77.  | BD | ( | 1) | C | 46 | - | O | 65 | /169. | LP* | ( | 9)  | Mn | 69 | 0.15  | 2.58   | 0.025 |
| 77.  | BD | ( | 1) | C | 46 | - | O | 65 | /562. | RY* | ( | 2)  | Mn | 69 | 0.03  | 3.83   | 0.014 |
| 77.  | BD | ( | 1) | C | 46 | - | O | 65 | /564. | RY* | ( | 4)  | Mn | 69 | 0.03  | 3.03   | 0.013 |
| 77.  | BD | ( | 1) | C | 46 | - | O | 65 | /568. | RY* | ( | 8)  | Mn | 69 | 0.04  | 7.52   | 0.022 |
| 77.  | BD | ( | 1) | C | 46 | - | O | 65 | /571. | RY* | ( | 11) | Mn | 69 | 0.05  | 6.92   | 0.023 |
| 114. | CR | ( | 1) | C | 37 |   |   |    | /166. | LP  | ( | 6)  | Mn | 69 | 0.03  | 10.85  | 0.022 |
| 119. | CR | ( | 1) | N | 42 |   |   |    | /166. | LP  | ( | 6)  | Mn | 69 | 0.99  | 14.95  | 0.165 |
| 120. | CR | ( | 1) | N | 43 |   |   |    | /166. | LP  | ( | 6)  | Mn | 69 | 0.03  | 14.98  | 0.031 |
| 123. | CR | ( | 1) | C | 46 |   |   |    | /166. | LP  | ( | 6)  | Mn | 69 | 0.05  | 10.88  | 0.033 |
| 129. | CR | ( | 1) | O | 65 |   |   |    | /166. | LP  | ( | 6)  | Mn | 69 | 1.23  | 19.66  | 0.211 |
| 151. | LP | ( | 1) | N | 42 |   |   |    | /166. | LP  | ( | 6)  | Mn | 69 | 0.94  | 1.06   | 0.042 |
| 151. | LP | ( | 1) | N | 42 |   |   |    | /168. | LP* | ( | 8)  | Mn | 69 | 0.05  | 2.12   | 0.014 |
| 151. | LP | ( | 1) | N | 42 |   |   |    | /562. | RY* | ( | 2)  | Mn | 69 | 0.13  | 3.28   | 0.027 |
| 151. | LP | ( | 1) | N | 42 |   |   |    | /575. | RY* | ( | 15) | Mn | 69 | 0.03  | 5.85   | 0.018 |
| 151. | LP | ( | 1) | N | 42 |   |   |    | /578. | RY* | ( | 18) | Mn | 69 | 0.03  | 679.02 | 0.172 |
| 151. | LP | ( | 1) | N | 42 |   |   |    | /580. | RY* | ( | 20) | Mn | 69 | 0.05  | 149.26 | 0.114 |
| 151. | LP | ( | 1) | N | 42 |   |   |    | /581. | RY* | ( | 21) | Mn | 69 | 0.09  | 38.67  | 0.078 |
| 152. | LP | ( | 2) | N | 42 |   |   |    | /166. | LP  | ( | 6)  | Mn | 69 | 18.47 | 1.21   | 0.197 |
| 152. | LP | ( | 2) | N | 42 |   |   |    | /167. | LP* | ( | 7)  | Mn | 69 | 0.15  | 0.99   | 0.016 |
| 152. | LP | ( | 2) | N | 42 |   |   |    | /168. | LP* | ( | 8)  | Mn | 69 | 0.30  | 2.28   | 0.034 |
| 152. | LP | ( | 2) | N | 42 |   |   |    | /561. | RY* | ( | 1)  | Mn | 69 | 0.65  | 2.24   | 0.049 |
| 152. | LP | ( | 2) | N | 42 |   |   |    | /562. | RY* | ( | 2)  | Mn | 69 | 2.74  | 3.44   | 0.126 |
| 152. | LP | ( | 2) | N | 42 |   |   |    | /564. | RY* | ( | 4)  | Mn | 69 | 0.09  | 2.64   | 0.020 |
| 152. | LP | ( | 2) | N | 42 |   |   |    | /565. | RY* | ( | 5)  | Mn | 69 | 0.15  | 2.26   | 0.023 |
| 152. | LP | ( | 2) | N | 42 |   |   |    | /566. | RY* | ( | 6)  | Mn | 69 | 0.04  | 2.21   | 0.012 |
| 152. | LP | ( | 2) | N | 42 |   |   |    | /567. | RY* | ( | 7)  | Mn | 69 | 0.32  | 2.46   | 0.036 |
| 152. | LP | ( | 2) | N | 42 |   |   |    | /570. | RY* | ( | 10) | Mn | 69 | 0.09  | 9.21   | 0.038 |
| 152. | LP | ( | 2) | N | 42 |   |   |    | /574. | RY* | ( | 14) | Mn | 69 | 0.07  | 6.37   | 0.027 |
| 152. | LP | ( | 2) | N | 42 |   |   |    | /575. | RY* | ( | 15) | Mn | 69 | 0.18  | 6.00   | 0.042 |
| 152. | LP | ( | 2) | N | 42 |   |   |    | /578. | RY* | ( | 18) | Mn | 69 | 0.62  | 679.17 | 0.844 |
| 152. | LP | ( | 2) | N | 42 |   |   |    | /580. | RY* | ( | 20) | Mn | 69 | 1.24  | 149.41 | 0.559 |
| 152. | LP | ( | 2) | N | 42 |   |   |    | /581. | RY* | ( | 21) | Mn | 69 | 2.31  | 38.82  | 0.388 |
| 153. | LP | ( | 1) | N | 43 |   |   |    | /166. | LP  | ( | 6)  | Mn | 69 | 0.21  | 1.17   | 0.021 |
| 153. | LP | ( | 1) | N | 43 |   |   |    | /561. | RY* | ( | 1)  | Mn | 69 | 0.06  | 2.20   | 0.015 |
| 153. | LP | ( | 1) | N | 43 |   |   |    | /565. | RY* | ( | 5)  | Mn | 69 | 0.03  | 2.22   | 0.010 |
| 159. | LP | ( | 1) | O | 65 |   |   |    | /166. | LP  | ( | 6)  | Mn | 69 | 5.04  | 1.34   | 0.110 |
| 159. | LP | ( | 1) | O | 65 |   |   |    | /167. | LP* | ( | 7)  | Mn | 69 | 0.13  | 1.11   | 0.015 |
| 159. | LP | ( | 1) | O | 65 |   |   |    | /168. | LP* | ( | 8)  | Mn | 69 | 0.08  | 2.40   | 0.017 |
| 159. | LP | ( | 1) | O | 65 |   |   |    | /561. | RY* | ( | 1)  | Mn | 69 | 0.14  | 2.36   | 0.023 |
| 159. | LP | ( | 1) | O | 65 |   |   |    | /562. | RY* | ( | 2)  | Mn | 69 | 0.64  | 3.56   | 0.061 |
| 159. | LP | ( | 1) | O | 65 |   |   |    | /563. | RY* | ( | 3)  | Mn | 69 | 0.03  | 2.34   | 0.010 |
| 159. | LP | ( | 1) | O | 65 |   |   |    | /567. | RY* | ( | 7)  | Mn | 69 | 0.14  | 2.58   | 0.024 |
| 159. | LP | ( | 1) | O | 65 |   |   |    | /575. | RY* | ( | 15) | Mn | 69 | 0.03  | 6.13   | 0.018 |
| 159. | LP | ( | 1) | O | 65 |   |   |    | /578. | RY* | ( | 18) | Mn | 69 | 0.15  | 679.30 | 0.412 |
| 159. | LP | ( | 1) | O | 65 |   |   |    | /580. | RY* | ( | 20) | Mn | 69 | 0.27  | 149.54 | 0.254 |
| 159. | LP | ( | 1) | O | 65 |   |   |    | /581. | RY* | ( | 21) | Mn | 69 | 0.48  | 38.95  | 0.175 |
| 160. | LP | ( | 2) | O | 65 |   |   |    | /166. | LP  | ( | 6)  | Mn | 69 | 12.37 | 1.23   | 0.164 |
| 160. | LP | ( | 2) | O | 65 |   |   |    | /167. | LP* | ( | 7)  | Mn | 69 | 0.60  | 1.00   | 0.031 |

|                   |                       |      |        |       |
|-------------------|-----------------------|------|--------|-------|
| 160. LP ( 2) O 65 | /168. LP* ( 8) Mn 69  | 0.88 | 2.29   | 0.058 |
| 160. LP ( 2) O 65 | /169. LP* ( 9) Mn 69  | 0.03 | 2.21   | 0.011 |
| 160. LP ( 2) O 65 | /561. RY* ( 1) Mn 69  | 0.12 | 2.25   | 0.021 |
| 160. LP ( 2) O 65 | /562. RY* ( 2) Mn 69  | 1.23 | 3.45   | 0.084 |
| 160. LP ( 2) O 65 | /563. RY* ( 3) Mn 69  | 0.03 | 2.23   | 0.011 |
| 160. LP ( 2) O 65 | /567. RY* ( 7) Mn 69  | 0.28 | 2.47   | 0.034 |
| 160. LP ( 2) O 65 | /573. RY* ( 13) Mn 69 | 0.09 | 8.16   | 0.035 |
| 160. LP ( 2) O 65 | /575. RY* ( 15) Mn 69 | 0.13 | 6.02   | 0.036 |
| 160. LP ( 2) O 65 | /578. RY* ( 18) Mn 69 | 0.35 | 679.19 | 0.630 |
| 160. LP ( 2) O 65 | /579. RY* ( 19) Mn 69 | 0.03 | 27.52  | 0.035 |
| 160. LP ( 2) O 65 | /580. RY* ( 20) Mn 69 | 0.69 | 149.43 | 0.412 |
| 160. LP ( 2) O 65 | /581. RY* ( 21) Mn 69 | 1.28 | 38.84  | 0.287 |
| 161. LP ( 3) O 65 | /166. LP ( 6) Mn 69   | 3.67 | 1.07   | 0.082 |
| 161. LP ( 3) O 65 | /167. LP* ( 7) Mn 69  | 0.49 | 0.85   | 0.027 |
| 161. LP ( 3) O 65 | /168. LP* ( 8) Mn 69  | 0.11 | 2.14   | 0.020 |
| 161. LP ( 3) O 65 | /169. LP* ( 9) Mn 69  | 0.09 | 2.05   | 0.017 |
| 161. LP ( 3) O 65 | /561. RY* ( 1) Mn 69  | 0.12 | 2.10   | 0.021 |
| 161. LP ( 3) O 65 | /562. RY* ( 2) Mn 69  | 0.34 | 3.30   | 0.044 |
| 161. LP ( 3) O 65 | /567. RY* ( 7) Mn 69  | 0.05 | 2.32   | 0.015 |
| 161. LP ( 3) O 65 | /575. RY* ( 15) Mn 69 | 0.04 | 5.87   | 0.020 |
| 161. LP ( 3) O 65 | /578. RY* ( 18) Mn 69 | 0.09 | 679.04 | 0.316 |
| 161. LP ( 3) O 65 | /580. RY* ( 20) Mn 69 | 0.18 | 149.28 | 0.215 |
| 161. LP ( 3) O 65 | /581. RY* ( 21) Mn 69 | 0.35 | 38.68  | 0.151 |

from unit 3 to unit 1

|                         |                            |      |      |       |
|-------------------------|----------------------------|------|------|-------|
| 85. BD ( 1) O 62 - H 63 | /253. RY* ( 1) N 11        | 0.10 | 2.13 | 0.019 |
| 85. BD ( 1) O 62 - H 63 | /254. RY* ( 2) N 11        | 0.04 | 2.18 | 0.012 |
| 85. BD ( 1) O 62 - H 63 | /255. RY* ( 3) N 11        | 0.05 | 2.04 | 0.013 |
| 85. BD ( 1) O 62 - H 63 | /256. RY* ( 4) N 11        | 0.05 | 2.30 | 0.013 |
| 85. BD ( 1) O 62 - H 63 | /264. RY* ( 4) N 12        | 0.03 | 2.41 | 0.011 |
| 85. BD ( 1) O 62 - H 63 | /289. RY* ( 5) C 15        | 0.03 | 4.22 | 0.015 |
| 85. BD ( 1) O 62 - H 63 | /610. BD* ( 2) C 13 - C 15 | 0.03 | 0.80 | 0.007 |
| 86. BD ( 1) O 62 - H 64 | /253. RY* ( 1) N 11        | 0.06 | 2.13 | 0.014 |
| 86. BD ( 1) O 62 - H 64 | /254. RY* ( 2) N 11        | 0.03 | 2.19 | 0.010 |
| 86. BD ( 1) O 62 - H 64 | /255. RY* ( 3) N 11        | 0.03 | 2.05 | 0.010 |
| 86. BD ( 1) O 62 - H 64 | /285. RY* ( 1) C 15        | 0.04 | 1.94 | 0.011 |
| 86. BD ( 1) O 62 - H 64 | /301. RY ( 1) C 17         | 0.03 | 1.28 | 0.007 |
| 86. BD ( 1) O 62 - H 64 | /317. RY* ( 1) O 19        | 0.04 | 3.15 | 0.014 |
| 86. BD ( 1) O 62 - H 64 | /610. BD* ( 2) C 13 - C 15 | 0.04 | 0.80 | 0.008 |
| 86. BD ( 1) O 62 - H 64 | /614. BD* ( 1) C 15 - O 19 | 0.07 | 1.10 | 0.011 |
| 157. LP ( 1) O 62       | /269. RY* ( 1) C 13        | 0.03 | 1.55 | 0.008 |
| 157. LP ( 1) O 62       | /286. RY* ( 2) C 15        | 0.05 | 1.21 | 0.010 |
| 157. LP ( 1) O 62       | /596. BD* ( 1) C 6 - N 11  | 0.06 | 0.82 | 0.009 |
| 157. LP ( 1) O 62       | /614. BD* ( 1) C 15 - O 19 | 0.06 | 0.77 | 0.009 |
| 158. LP ( 2) O 62       | /213. RY* ( 1) C 6         | 0.03 | 1.53 | 0.009 |
| 158. LP ( 2) O 62       | /214. RY* ( 2) C 6         | 0.16 | 1.81 | 0.021 |
| 158. LP ( 2) O 62       | /216. RY* ( 4) C 6         | 0.08 | 1.69 | 0.015 |
| 158. LP ( 2) O 62       | /218. RY* ( 6) C 6         | 0.04 | 3.86 | 0.016 |
| 158. LP ( 2) O 62       | /253. RY* ( 1) N 11        | 0.59 | 2.00 | 0.044 |
| 158. LP ( 2) O 62       | /254. RY* ( 2) N 11        | 0.36 | 2.05 | 0.034 |
| 158. LP ( 2) O 62       | /255. RY* ( 3) N 11        | 0.21 | 1.91 | 0.025 |
| 158. LP ( 2) O 62       | /256. RY* ( 4) N 11        | 0.15 | 2.18 | 0.023 |
| 158. LP ( 2) O 62       | /264. RY* ( 4) N 12        | 0.03 | 2.28 | 0.011 |
| 158. LP ( 2) O 62       | /271. RY* ( 3) C 13        | 0.03 | 1.46 | 0.009 |
| 158. LP ( 2) O 62       | /285. RY* ( 1) C 15        | 0.19 | 1.81 | 0.024 |
| 158. LP ( 2) O 62       | /286. RY* ( 2) C 15        | 0.09 | 1.40 | 0.014 |
| 158. LP ( 2) O 62       | /289. RY* ( 5) C 15        | 0.12 | 4.09 | 0.028 |
| 158. LP ( 2) O 62       | /317. RY* ( 1) O 19        | 0.46 | 3.02 | 0.048 |
| 158. LP ( 2) O 62       | /319. RY* ( 3) O 19        | 0.05 | 1.98 | 0.013 |
| 158. LP ( 2) O 62       | /320. RY* ( 4) O 19        | 0.03 | 2.45 | 0.010 |
| 158. LP ( 2) O 62       | /596. BD* ( 1) C 6 - N 11  | 0.06 | 1.02 | 0.010 |
| 158. LP ( 2) O 62       | /614. BD* ( 1) C 15 - O 19 | 0.03 | 0.97 | 0.007 |

from unit 3 to unit 2

|                         |                            |      |      |       |
|-------------------------|----------------------------|------|------|-------|
| 85. BD ( 1) O 62 - H 63 | /387. RY* ( 1) C 36        | 0.05 | 1.30 | 0.010 |
| 85. BD ( 1) O 62 - H 63 | /388. RY* ( 2) C 36        | 0.04 | 2.02 | 0.011 |
| 85. BD ( 1) O 62 - H 63 | /397. RY* ( 3) C 37        | 0.05 | 1.90 | 0.013 |
| 86. BD ( 1) O 62 - H 64 | / 50. BD* ( 2) C 34 - C 36 | 0.04 | 0.72 | 0.011 |
| 86. BD ( 1) O 62 - H 64 | /387. RY* ( 1) C 36        | 0.04 | 1.31 | 0.009 |
| 86. BD ( 1) O 62 - H 64 | /388. RY* ( 2) C 36        | 0.06 | 2.03 | 0.014 |
| 86. BD ( 1) O 62 - H 64 | /435. RY* ( 1) N 42        | 0.06 | 2.67 | 0.016 |

|                         |                            |      |      |       |
|-------------------------|----------------------------|------|------|-------|
| 86. BD ( 1) O 62 - H 64 | /437. RY* ( 3) N 42        | 0.10 | 2.00 | 0.018 |
| 157. LP ( 1) O 62       | / 50. BD* ( 2) C 34 - C 36 | 0.11 | 0.39 | 0.013 |
| 157. LP ( 1) O 62       | / 54. BD* ( 2) C 35 - C 37 | 0.09 | 0.40 | 0.011 |
| 158. LP ( 2) O 62       | / 54. BD* ( 2) C 35 - C 37 | 0.08 | 0.60 | 0.012 |
| 158. LP ( 2) O 62       | /395. RY* ( 1) C 37        | 0.04 | 1.54 | 0.010 |
| 158. LP ( 2) O 62       | /396. RY* ( 2) C 37        | 0.14 | 1.73 | 0.020 |
| 158. LP ( 2) O 62       | /400. RY* ( 6) C 37        | 0.08 | 3.78 | 0.022 |
| 158. LP ( 2) O 62       | /435. RY* ( 1) N 42        | 0.47 | 2.54 | 0.044 |
| 158. LP ( 2) O 62       | /436. RY* ( 2) N 42        | 0.07 | 1.59 | 0.014 |
| 158. LP ( 2) O 62       | /437. RY* ( 3) N 42        | 0.40 | 1.87 | 0.035 |
| 158. LP ( 2) O 62       | /438. RY* ( 4) N 42        | 0.09 | 2.14 | 0.017 |
| 158. LP ( 2) O 62       | /443. RY* ( 1) N 43        | 0.03 | 1.51 | 0.009 |
| 158. LP ( 2) O 62       | /444. RY* ( 2) N 43        | 0.03 | 1.45 | 0.008 |
| 158. LP ( 2) O 62       | /445. RY* ( 3) N 43        | 0.11 | 1.73 | 0.018 |
| 158. LP ( 2) O 62       | /467. RY* ( 1) C 46        | 0.13 | 1.80 | 0.020 |
| 158. LP ( 2) O 62       | /468. RY* ( 2) C 46        | 0.04 | 2.09 | 0.012 |
| 158. LP ( 2) O 62       | /470. RY* ( 4) C 46        | 0.05 | 1.40 | 0.010 |
| 158. LP ( 2) O 62       | /471. RY* ( 5) C 46        | 0.04 | 5.49 | 0.018 |
| 158. LP ( 2) O 62       | /541. RY* ( 1) O 65        | 0.15 | 3.03 | 0.027 |
| 158. LP ( 2) O 62       | /543. RY* ( 3) O 65        | 0.05 | 2.04 | 0.013 |
| 158. LP ( 2) O 62       | /544. RY* ( 4) O 65        | 0.04 | 2.33 | 0.012 |
| 158. LP ( 2) O 62       | /633. BD* ( 1) C 37 - N 42 | 0.05 | 1.02 | 0.009 |
| 158. LP ( 2) O 62       | /643. BD* ( 1) N 42 - N 43 | 0.18 | 1.15 | 0.018 |

within unit 3

|                   |                     |      |       |       |
|-------------------|---------------------|------|-------|-------|
| 128. CR ( 1) O 62 | /538. RY* ( 2) H 63 | 0.40 | 21.17 | 0.116 |
| 128. CR ( 1) O 62 | /540. RY* ( 2) H 64 | 0.41 | 21.21 | 0.118 |
| 158. LP ( 2) O 62 | /529. RY* ( 1) O 62 | 2.53 | 2.67  | 0.105 |
| 158. LP ( 2) O 62 | /531. RY* ( 3) O 62 | 0.31 | 2.00  | 0.032 |
| 158. LP ( 2) O 62 | /532. RY* ( 4) O 62 | 0.45 | 2.00  | 0.038 |
| 158. LP ( 2) O 62 | /537. RY* ( 1) H 63 | 0.95 | 1.20  | 0.043 |
| 158. LP ( 2) O 62 | /538. RY* ( 2) H 63 | 0.31 | 2.85  | 0.038 |
| 158. LP ( 2) O 62 | /539. RY* ( 1) H 64 | 1.02 | 1.21  | 0.045 |
| 158. LP ( 2) O 62 | /540. RY* ( 2) H 64 | 0.32 | 2.90  | 0.039 |

from unit 3 to unit 4

|                         |                            |      |      |       |
|-------------------------|----------------------------|------|------|-------|
| 85. BD ( 1) O 62 - H 63 | /549. RY* ( 1) H 66        | 0.03 | 1.46 | 0.009 |
| 85. BD ( 1) O 62 - H 63 | /551. RY* ( 1) H 67        | 0.05 | 1.40 | 0.011 |
| 85. BD ( 1) O 62 - H 63 | /553. RY* ( 1) O 68        | 0.06 | 2.70 | 0.016 |
| 86. BD ( 1) O 62 - H 64 | /549. RY* ( 1) H 66        | 0.03 | 1.47 | 0.009 |
| 86. BD ( 1) O 62 - H 64 | /553. RY* ( 1) O 68        | 0.03 | 2.70 | 0.012 |
| 158. LP ( 2) O 62       | /549. RY* ( 1) H 66        | 0.46 | 1.34 | 0.031 |
| 158. LP ( 2) O 62       | /551. RY* ( 1) H 67        | 0.44 | 1.27 | 0.030 |
| 158. LP ( 2) O 62       | /553. RY* ( 1) O 68        | 0.93 | 2.57 | 0.062 |
| 158. LP ( 2) O 62       | /554. RY* ( 2) O 68        | 0.05 | 1.63 | 0.011 |
| 158. LP ( 2) O 62       | /556. RY* ( 4) O 68        | 0.35 | 2.45 | 0.037 |
| 158. LP ( 2) O 62       | /663. BD* ( 1) H 67 - O 68 | 0.03 | 0.98 | 0.006 |

from unit 3 to unit 5

|                         |                       |      |        |       |
|-------------------------|-----------------------|------|--------|-------|
| 85. BD ( 1) O 62 - H 63 | /166. LP ( 6) Mn 69   | 2.19 | 1.54   | 0.079 |
| 85. BD ( 1) O 62 - H 63 | /167. LP* ( 7) Mn 69  | 0.04 | 1.31   | 0.009 |
| 85. BD ( 1) O 62 - H 63 | /168. LP* ( 8) Mn 69  | 0.04 | 2.60   | 0.013 |
| 85. BD ( 1) O 62 - H 63 | /169. LP* ( 9) Mn 69  | 0.03 | 2.52   | 0.011 |
| 85. BD ( 1) O 62 - H 63 | /562. RY* ( 2) Mn 69  | 0.56 | 3.76   | 0.058 |
| 85. BD ( 1) O 62 - H 63 | /563. RY* ( 3) Mn 69  | 0.09 | 2.54   | 0.019 |
| 85. BD ( 1) O 62 - H 63 | /565. RY* ( 5) Mn 69  | 0.04 | 2.58   | 0.013 |
| 85. BD ( 1) O 62 - H 63 | /568. RY* ( 8) Mn 69  | 0.05 | 7.45   | 0.023 |
| 85. BD ( 1) O 62 - H 63 | /571. RY* ( 11) Mn 69 | 0.03 | 6.86   | 0.019 |
| 85. BD ( 1) O 62 - H 63 | /578. RY* ( 18) Mn 69 | 0.07 | 679.50 | 0.272 |
| 85. BD ( 1) O 62 - H 63 | /580. RY* ( 20) Mn 69 | 0.12 | 149.74 | 0.168 |
| 85. BD ( 1) O 62 - H 63 | /581. RY* ( 21) Mn 69 | 0.21 | 39.15  | 0.115 |
| 86. BD ( 1) O 62 - H 64 | /166. LP ( 6) Mn 69   | 2.30 | 1.54   | 0.081 |
| 86. BD ( 1) O 62 - H 64 | /562. RY* ( 2) Mn 69  | 0.55 | 3.77   | 0.057 |
| 86. BD ( 1) O 62 - H 64 | /563. RY* ( 3) Mn 69  | 0.03 | 2.54   | 0.012 |
| 86. BD ( 1) O 62 - H 64 | /564. RY* ( 4) Mn 69  | 0.16 | 2.97   | 0.027 |
| 86. BD ( 1) O 62 - H 64 | /568. RY* ( 8) Mn 69  | 0.03 | 7.46   | 0.017 |
| 86. BD ( 1) O 62 - H 64 | /575. RY* ( 15) Mn 69 | 0.04 | 6.34   | 0.020 |
| 86. BD ( 1) O 62 - H 64 | /578. RY* ( 18) Mn 69 | 0.08 | 679.51 | 0.301 |
| 86. BD ( 1) O 62 - H 64 | /580. RY* ( 20) Mn 69 | 0.15 | 149.75 | 0.189 |
| 86. BD ( 1) O 62 - H 64 | /581. RY* ( 21) Mn 69 | 0.27 | 39.15  | 0.129 |
| 128. CR ( 1) O 62       | /166. LP ( 6) Mn 69   | 1.34 | 19.72  | 0.221 |

|                   |                       |       |        |       |
|-------------------|-----------------------|-------|--------|-------|
| 157. LP ( 1) O 62 | /166. LP ( 6) Mn 69   | 0.27  | 1.22   | 0.024 |
| 157. LP ( 1) O 62 | /168. LP* ( 8) Mn 69  | 0.04  | 2.28   | 0.011 |
| 157. LP ( 1) O 62 | /169. LP* ( 9) Mn 69  | 0.03  | 2.20   | 0.010 |
| 158. LP ( 2) O 62 | /166. LP ( 6) Mn 69   | 19.06 | 1.41   | 0.219 |
| 158. LP ( 2) O 62 | /167. LP* ( 7) Mn 69  | 0.25  | 1.18   | 0.022 |
| 158. LP ( 2) O 62 | /168. LP* ( 8) Mn 69  | 0.92  | 2.47   | 0.061 |
| 158. LP ( 2) O 62 | /169. LP* ( 9) Mn 69  | 0.83  | 2.39   | 0.057 |
| 158. LP ( 2) O 62 | /561. RY* ( 1) Mn 69  | 0.29  | 2.44   | 0.034 |
| 158. LP ( 2) O 62 | /562. RY* ( 2) Mn 69  | 2.94  | 3.63   | 0.132 |
| 158. LP ( 2) O 62 | /564. RY* ( 4) Mn 69  | 0.19  | 2.84   | 0.030 |
| 158. LP ( 2) O 62 | /565. RY* ( 5) Mn 69  | 0.18  | 2.46   | 0.027 |
| 158. LP ( 2) O 62 | /566. RY* ( 6) Mn 69  | 0.03  | 2.41   | 0.011 |
| 158. LP ( 2) O 62 | /567. RY* ( 7) Mn 69  | 0.22  | 2.65   | 0.031 |
| 158. LP ( 2) O 62 | /568. RY* ( 8) Mn 69  | 0.22  | 7.33   | 0.052 |
| 158. LP ( 2) O 62 | /569. RY* ( 9) Mn 69  | 0.04  | 8.67   | 0.023 |
| 158. LP ( 2) O 62 | /570. RY* ( 10) Mn 69 | 0.13  | 9.41   | 0.045 |
| 158. LP ( 2) O 62 | /571. RY* ( 11) Mn 69 | 0.21  | 6.73   | 0.048 |
| 158. LP ( 2) O 62 | /572. RY* ( 12) Mn 69 | 0.08  | 5.82   | 0.027 |
| 158. LP ( 2) O 62 | /573. RY* ( 13) Mn 69 | 0.18  | 8.34   | 0.050 |
| 158. LP ( 2) O 62 | /574. RY* ( 14) Mn 69 | 0.10  | 6.57   | 0.033 |
| 158. LP ( 2) O 62 | /575. RY* ( 15) Mn 69 | 0.30  | 6.20   | 0.055 |
| 158. LP ( 2) O 62 | /577. RY* ( 17) Mn 69 | 0.03  | 27.91  | 0.034 |
| 158. LP ( 2) O 62 | /578. RY* ( 18) Mn 69 | 0.79  | 679.37 | 0.932 |
| 158. LP ( 2) O 62 | /579. RY* ( 19) Mn 69 | 0.11  | 27.70  | 0.071 |
| 158. LP ( 2) O 62 | /580. RY* ( 20) Mn 69 | 1.52  | 149.61 | 0.608 |
| 158. LP ( 2) O 62 | /581. RY* ( 21) Mn 69 | 2.76  | 39.02  | 0.419 |

from unit 4 to unit 1

|                         |                            |      |      |       |
|-------------------------|----------------------------|------|------|-------|
| 87. BD ( 1) H 66 - O 68 | /206. RY* ( 2) C 5         | 0.05 | 2.02 | 0.013 |
| 88. BD ( 1) H 67 - O 68 | /213. RY* ( 1) C 6         | 0.03 | 1.66 | 0.009 |
| 88. BD ( 1) H 67 - O 68 | /214. RY* ( 2) C 6         | 0.03 | 1.93 | 0.009 |
| 88. BD ( 1) H 67 - O 68 | /215. RY* ( 3) C 6         | 0.05 | 1.88 | 0.012 |
| 88. BD ( 1) H 67 - O 68 | /216. RY* ( 4) C 6         | 0.03 | 1.82 | 0.010 |
| 88. BD ( 1) H 67 - O 68 | /253. RY* ( 1) N 11        | 0.03 | 2.13 | 0.010 |
| 88. BD ( 1) H 67 - O 68 | /255. RY* ( 3) N 11        | 0.03 | 2.04 | 0.010 |
| 162. LP ( 1) O 68       | /353. RY* ( 1) H 31        | 0.04 | 1.01 | 0.008 |
| 162. LP ( 1) O 68       | /354. RY* ( 2) H 31        | 0.03 | 2.67 | 0.012 |
| 162. LP ( 1) O 68       | /589. BD* ( 2) C 3 - C 5   | 0.37 | 0.43 | 0.018 |
| 162. LP ( 1) O 68       | /592. BD* ( 2) C 4 - C 6   | 0.06 | 0.43 | 0.008 |
| 163. LP ( 2) O 68       | /213. RY* ( 1) C 6         | 0.03 | 1.53 | 0.009 |
| 163. LP ( 2) O 68       | /214. RY* ( 2) C 6         | 0.14 | 1.80 | 0.020 |
| 163. LP ( 2) O 68       | /216. RY* ( 4) C 6         | 0.03 | 1.69 | 0.009 |
| 163. LP ( 2) O 68       | /218. RY* ( 6) C 6         | 0.08 | 3.85 | 0.022 |
| 163. LP ( 2) O 68       | /253. RY* ( 1) N 11        | 0.30 | 2.00 | 0.031 |
| 163. LP ( 2) O 68       | /254. RY* ( 2) N 11        | 0.27 | 2.05 | 0.030 |
| 163. LP ( 2) O 68       | /255. RY* ( 3) N 11        | 0.34 | 1.91 | 0.032 |
| 163. LP ( 2) O 68       | /256. RY* ( 4) N 11        | 0.11 | 2.17 | 0.020 |
| 163. LP ( 2) O 68       | /262. RY* ( 2) N 12        | 0.03 | 1.43 | 0.008 |
| 163. LP ( 2) O 68       | /263. RY* ( 3) N 12        | 0.09 | 1.75 | 0.016 |
| 163. LP ( 2) O 68       | /285. RY* ( 1) C 15        | 0.13 | 1.80 | 0.019 |
| 163. LP ( 2) O 68       | /286. RY* ( 2) C 15        | 0.06 | 1.40 | 0.011 |
| 163. LP ( 2) O 68       | /287. RY* ( 3) C 15        | 0.03 | 1.95 | 0.010 |
| 163. LP ( 2) O 68       | /289. RY* ( 5) C 15        | 0.10 | 4.08 | 0.026 |
| 163. LP ( 2) O 68       | /317. RY* ( 1) O 19        | 0.12 | 3.01 | 0.024 |
| 163. LP ( 2) O 68       | /319. RY* ( 3) O 19        | 0.05 | 1.97 | 0.013 |
| 163. LP ( 2) O 68       | /589. BD* ( 2) C 3 - C 5   | 0.06 | 0.63 | 0.009 |
| 163. LP ( 2) O 68       | /592. BD* ( 2) C 4 - C 6   | 0.07 | 0.63 | 0.010 |
| 163. LP ( 2) O 68       | /596. BD* ( 1) C 6 - N 11  | 0.07 | 1.01 | 0.011 |
| 163. LP ( 2) O 68       | /606. BD* ( 1) N 11 - N 12 | 0.22 | 1.13 | 0.020 |

from unit 4 to unit 2

|                         |                            |      |      |       |
|-------------------------|----------------------------|------|------|-------|
| 87. BD ( 1) H 66 - O 68 | /396. RY* ( 2) C 37        | 0.03 | 1.86 | 0.010 |
| 87. BD ( 1) H 66 - O 68 | /435. RY* ( 1) N 42        | 0.10 | 2.66 | 0.020 |
| 87. BD ( 1) H 66 - O 68 | /436. RY* ( 2) N 42        | 0.04 | 1.72 | 0.010 |
| 87. BD ( 1) H 66 - O 68 | /437. RY* ( 3) N 42        | 0.17 | 1.99 | 0.023 |
| 87. BD ( 1) H 66 - O 68 | /438. RY* ( 4) N 42        | 0.03 | 2.27 | 0.010 |
| 87. BD ( 1) H 66 - O 68 | /541. RY* ( 1) O 65        | 0.09 | 3.16 | 0.021 |
| 87. BD ( 1) H 66 - O 68 | /544. RY* ( 4) O 65        | 0.03 | 2.46 | 0.011 |
| 87. BD ( 1) H 66 - O 68 | /640. BD* ( 2) C 40 - C 41 | 0.04 | 0.79 | 0.009 |
| 88. BD ( 1) H 67 - O 68 | /395. RY* ( 1) C 37        | 0.03 | 1.66 | 0.008 |
| 88. BD ( 1) H 67 - O 68 | /396. RY* ( 2) C 37        | 0.03 | 1.86 | 0.010 |

|                         |                            |      |      |       |
|-------------------------|----------------------------|------|------|-------|
| 88. BD ( 1) H 67 - O 68 | /435. RY* ( 1) N 42        | 0.05 | 2.66 | 0.015 |
| 88. BD ( 1) H 67 - O 68 | /436. RY* ( 2) N 42        | 0.04 | 1.72 | 0.010 |
| 88. BD ( 1) H 67 - O 68 | /437. RY* ( 3) N 42        | 0.09 | 1.99 | 0.017 |
| 88. BD ( 1) H 67 - O 68 | /438. RY* ( 4) N 42        | 0.03 | 2.27 | 0.010 |
| 88. BD ( 1) H 67 - O 68 | /652. BD* ( 1) C 46 - O 65 | 0.03 | 1.09 | 0.007 |
| 162. LP ( 1) O 68       | /396. RY* ( 2) C 37        | 0.03 | 1.53 | 0.009 |
| 162. LP ( 1) O 68       | /419. RY* ( 1) C 40        | 0.03 | 1.07 | 0.007 |
| 162. LP ( 1) O 68       | /633. BD* ( 1) C 37 - N 42 | 0.03 | 0.82 | 0.006 |
| 162. LP ( 1) O 68       | /643. BD* ( 1) N 42 - N 43 | 0.06 | 0.95 | 0.009 |
| 163. LP ( 2) O 68       | /396. RY* ( 2) C 37        | 0.16 | 1.73 | 0.021 |
| 163. LP ( 2) O 68       | /398. RY* ( 4) C 37        | 0.03 | 1.68 | 0.009 |
| 163. LP ( 2) O 68       | /400. RY* ( 6) C 37        | 0.04 | 3.78 | 0.015 |
| 163. LP ( 2) O 68       | /419. RY* ( 1) C 40        | 0.04 | 1.27 | 0.009 |
| 163. LP ( 2) O 68       | /435. RY* ( 1) N 42        | 0.50 | 2.53 | 0.045 |
| 163. LP ( 2) O 68       | /436. RY* ( 2) N 42        | 0.17 | 1.59 | 0.021 |
| 163. LP ( 2) O 68       | /437. RY* ( 3) N 42        | 0.40 | 1.86 | 0.035 |
| 163. LP ( 2) O 68       | /438. RY* ( 4) N 42        | 0.06 | 2.14 | 0.014 |
| 163. LP ( 2) O 68       | /443. RY* ( 1) N 43        | 0.06 | 1.51 | 0.012 |
| 163. LP ( 2) O 68       | /445. RY* ( 3) N 43        | 0.08 | 1.73 | 0.015 |
| 163. LP ( 2) O 68       | /453. RY* ( 3) C 44        | 0.03 | 1.53 | 0.009 |
| 163. LP ( 2) O 68       | /467. RY* ( 1) C 46        | 0.17 | 1.80 | 0.022 |
| 163. LP ( 2) O 68       | /470. RY* ( 4) C 46        | 0.04 | 1.40 | 0.010 |
| 163. LP ( 2) O 68       | /471. RY* ( 5) C 46        | 0.04 | 5.49 | 0.018 |
| 163. LP ( 2) O 68       | /541. RY* ( 1) O 65        | 0.53 | 3.03 | 0.051 |
| 163. LP ( 2) O 68       | /543. RY* ( 3) O 65        | 0.07 | 2.04 | 0.015 |
| 163. LP ( 2) O 68       | /544. RY* ( 4) O 65        | 0.10 | 2.33 | 0.019 |
| 163. LP ( 2) O 68       | /643. BD* ( 1) N 42 - N 43 | 0.07 | 1.15 | 0.011 |
| 163. LP ( 2) O 68       | /652. BD* ( 1) C 46 - O 65 | 0.06 | 0.97 | 0.010 |

from unit 4 to unit 3

|                         |                            |      |      |       |
|-------------------------|----------------------------|------|------|-------|
| 87. BD ( 1) H 66 - O 68 | /529. RY* ( 1) O 62        | 0.06 | 2.80 | 0.017 |
| 87. BD ( 1) H 66 - O 68 | /537. RY* ( 1) H 63        | 0.03 | 1.32 | 0.008 |
| 87. BD ( 1) H 66 - O 68 | /661. BD* ( 1) O 62 - H 64 | 0.03 | 1.10 | 0.007 |
| 88. BD ( 1) H 67 - O 68 | /529. RY* ( 1) O 62        | 0.08 | 2.80 | 0.019 |
| 163. LP ( 2) O 68       | /529. RY* ( 1) O 62        | 0.95 | 2.67 | 0.064 |
| 163. LP ( 2) O 68       | /531. RY* ( 3) O 62        | 0.14 | 2.00 | 0.021 |
| 163. LP ( 2) O 68       | /532. RY* ( 4) O 62        | 0.34 | 2.00 | 0.033 |
| 163. LP ( 2) O 68       | /537. RY* ( 1) H 63        | 0.25 | 1.19 | 0.022 |
| 163. LP ( 2) O 68       | /539. RY* ( 1) H 64        | 0.24 | 1.20 | 0.022 |
| 163. LP ( 2) O 68       | /660. BD* ( 1) O 62 - H 63 | 0.04 | 0.97 | 0.008 |

within unit 4

|                         |                     |      |       |       |
|-------------------------|---------------------|------|-------|-------|
| 88. BD ( 1) H 67 - O 68 | /550. RY* ( 2) H 66 | 0.28 | 2.94  | 0.036 |
| 130. CR ( 1) O 68       | /550. RY* ( 2) H 66 | 0.36 | 21.12 | 0.110 |
| 130. CR ( 1) O 68       | /552. RY* ( 2) H 67 | 0.39 | 21.16 | 0.115 |
| 163. LP ( 2) O 68       | /549. RY* ( 1) H 66 | 0.93 | 1.33  | 0.045 |
| 163. LP ( 2) O 68       | /550. RY* ( 2) H 66 | 0.40 | 2.81  | 0.043 |
| 163. LP ( 2) O 68       | /551. RY* ( 1) H 67 | 1.17 | 1.26  | 0.049 |
| 163. LP ( 2) O 68       | /552. RY* ( 2) H 67 | 0.39 | 2.85  | 0.042 |
| 163. LP ( 2) O 68       | /553. RY* ( 1) O 68 | 2.43 | 2.57  | 0.101 |
| 163. LP ( 2) O 68       | /556. RY* ( 4) O 68 | 0.60 | 2.44  | 0.049 |

from unit 4 to unit 5

|                         |                       |      |        |       |
|-------------------------|-----------------------|------|--------|-------|
| 87. BD ( 1) H 66 - O 68 | /166. LP ( 6) Mn 69   | 2.51 | 1.53   | 0.084 |
| 87. BD ( 1) H 66 - O 68 | /169. LP* ( 9) Mn 69  | 0.05 | 2.52   | 0.014 |
| 87. BD ( 1) H 66 - O 68 | /562. RY* ( 2) Mn 69  | 0.68 | 3.76   | 0.064 |
| 87. BD ( 1) H 66 - O 68 | /563. RY* ( 3) Mn 69  | 0.03 | 2.54   | 0.011 |
| 87. BD ( 1) H 66 - O 68 | /564. RY* ( 4) Mn 69  | 0.05 | 2.96   | 0.015 |
| 87. BD ( 1) H 66 - O 68 | /569. RY* ( 9) Mn 69  | 0.03 | 8.80   | 0.022 |
| 87. BD ( 1) H 66 - O 68 | /570. RY* ( 10) Mn 69 | 0.03 | 9.53   | 0.021 |
| 87. BD ( 1) H 66 - O 68 | /575. RY* ( 15) Mn 69 | 0.04 | 6.33   | 0.020 |
| 87. BD ( 1) H 66 - O 68 | /578. RY* ( 18) Mn 69 | 0.10 | 679.50 | 0.324 |
| 87. BD ( 1) H 66 - O 68 | /580. RY* ( 20) Mn 69 | 0.17 | 149.74 | 0.202 |
| 87. BD ( 1) H 66 - O 68 | /581. RY* ( 21) Mn 69 | 0.30 | 39.14  | 0.138 |
| 88. BD ( 1) H 67 - O 68 | /166. LP ( 6) Mn 69   | 2.43 | 1.53   | 0.083 |
| 88. BD ( 1) H 67 - O 68 | /169. LP* ( 9) Mn 69  | 0.06 | 2.51   | 0.016 |
| 88. BD ( 1) H 67 - O 68 | /562. RY* ( 2) Mn 69  | 0.57 | 3.76   | 0.059 |
| 88. BD ( 1) H 67 - O 68 | /563. RY* ( 3) Mn 69  | 0.03 | 2.53   | 0.011 |
| 88. BD ( 1) H 67 - O 68 | /566. RY* ( 6) Mn 69  | 0.03 | 2.53   | 0.011 |
| 88. BD ( 1) H 67 - O 68 | /567. RY* ( 7) Mn 69  | 0.05 | 2.78   | 0.015 |
| 88. BD ( 1) H 67 - O 68 | /569. RY* ( 9) Mn 69  | 0.06 | 8.80   | 0.030 |

|                         |                       |       |        |       |
|-------------------------|-----------------------|-------|--------|-------|
| 88. BD ( 1) H 67 - O 68 | /578. RY* ( 18) Mn 69 | 0.08  | 679.50 | 0.291 |
| 88. BD ( 1) H 67 - O 68 | /580. RY* ( 20) Mn 69 | 0.14  | 149.74 | 0.182 |
| 88. BD ( 1) H 67 - O 68 | /581. RY* ( 21) Mn 69 | 0.25  | 39.14  | 0.125 |
| 130. CR ( 1) O 68       | /166. LP ( 6) Mn 69   | 1.37  | 19.72  | 0.222 |
| 162. LP ( 1) O 68       | /166. LP ( 6) Mn 69   | 0.17  | 1.21   | 0.019 |
| 162. LP ( 1) O 68       | /168. LP* ( 8) Mn 69  | 0.03  | 2.27   | 0.010 |
| 162. LP ( 1) O 68       | /561. RY* ( 1) Mn 69  | 0.03  | 2.24   | 0.011 |
| 163. LP ( 2) O 68       | /166. LP ( 6) Mn 69   | 18.50 | 1.40   | 0.216 |
| 163. LP ( 2) O 68       | /167. LP* ( 7) Mn 69  | 0.18  | 1.18   | 0.019 |
| 163. LP ( 2) O 68       | /168. LP* ( 8) Mn 69  | 0.32  | 2.47   | 0.036 |
| 163. LP ( 2) O 68       | /169. LP* ( 9) Mn 69  | 2.15  | 2.39   | 0.091 |
| 163. LP ( 2) O 68       | /561. RY* ( 1) Mn 69  | 0.15  | 2.43   | 0.024 |
| 163. LP ( 2) O 68       | /562. RY* ( 2) Mn 69  | 2.62  | 3.63   | 0.124 |
| 163. LP ( 2) O 68       | /563. RY* ( 3) Mn 69  | 0.03  | 2.41   | 0.011 |
| 163. LP ( 2) O 68       | /565. RY* ( 5) Mn 69  | 0.08  | 2.45   | 0.018 |
| 163. LP ( 2) O 68       | /567. RY* ( 7) Mn 69  | 0.27  | 2.65   | 0.034 |
| 163. LP ( 2) O 68       | /568. RY* ( 8) Mn 69  | 0.12  | 7.32   | 0.038 |
| 163. LP ( 2) O 68       | /569. RY* ( 9) Mn 69  | 0.57  | 8.67   | 0.089 |
| 163. LP ( 2) O 68       | /570. RY* ( 10) Mn 69 | 0.03  | 9.40   | 0.022 |
| 163. LP ( 2) O 68       | /573. RY* ( 13) Mn 69 | 0.11  | 8.34   | 0.038 |
| 163. LP ( 2) O 68       | /574. RY* ( 14) Mn 69 | 0.24  | 6.56   | 0.051 |
| 163. LP ( 2) O 68       | /575. RY* ( 15) Mn 69 | 0.08  | 6.20   | 0.028 |
| 163. LP ( 2) O 68       | /576. RY* ( 16) Mn 69 | 0.15  | 27.60  | 0.083 |
| 163. LP ( 2) O 68       | /578. RY* ( 18) Mn 69 | 0.75  | 679.37 | 0.910 |
| 163. LP ( 2) O 68       | /580. RY* ( 20) Mn 69 | 1.45  | 149.61 | 0.594 |
| 163. LP ( 2) O 68       | /581. RY* ( 21) Mn 69 | 2.63  | 39.01  | 0.409 |

from unit 5 to unit 1

|                    |                            |      |       |       |
|--------------------|----------------------------|------|-------|-------|
| 132. CR ( 2) Mn 69 | /596. BD* ( 1) C 6 - N 11  | 0.13 | 26.79 | 0.074 |
| 132. CR ( 2) Mn 69 | /606. BD* ( 1) N 11 - N 12 | 0.09 | 26.91 | 0.062 |
| 132. CR ( 2) Mn 69 | /614. BD* ( 1) C 15 - O 19 | 0.13 | 26.75 | 0.075 |
| 133. CR ( 3) Mn 69 | /255. RY* ( 3) N 11        | 0.08 | 5.38  | 0.026 |
| 133. CR ( 3) Mn 69 | /596. BD* ( 1) C 6 - N 11  | 0.64 | 4.49  | 0.068 |
| 133. CR ( 3) Mn 69 | /606. BD* ( 1) N 11 - N 12 | 0.45 | 4.61  | 0.058 |
| 133. CR ( 3) Mn 69 | /613. BD* ( 1) C 15 - C 17 | 0.03 | 4.56  | 0.014 |
| 133. CR ( 3) Mn 69 | /614. BD* ( 1) C 15 - O 19 | 0.75 | 4.44  | 0.074 |
| 135. CR ( 5) Mn 69 | /254. RY* ( 2) N 11        | 0.03 | 3.48  | 0.012 |
| 135. CR ( 5) Mn 69 | /255. RY* ( 3) N 11        | 0.06 | 3.34  | 0.017 |
| 135. CR ( 5) Mn 69 | /596. BD* ( 1) C 6 - N 11  | 0.19 | 2.44  | 0.028 |
| 135. CR ( 5) Mn 69 | /606. BD* ( 1) N 11 - N 12 | 0.16 | 2.56  | 0.026 |
| 137. CR ( 7) Mn 69 | /317. RY* ( 1) O 19        | 0.03 | 4.44  | 0.014 |
| 137. CR ( 7) Mn 69 | /606. BD* ( 1) N 11 - N 12 | 0.05 | 2.56  | 0.015 |
| 137. CR ( 7) Mn 69 | /614. BD* ( 1) C 15 - O 19 | 0.38 | 2.39  | 0.038 |
| 139. CR ( 9) Mn 69 | /596. BD* ( 1) C 6 - N 11  | 0.08 | 2.44  | 0.017 |
| 139. CR ( 9) Mn 69 | /606. BD* ( 1) N 11 - N 12 | 0.03 | 2.56  | 0.011 |
| 139. CR ( 9) Mn 69 | /614. BD* ( 1) C 15 - O 19 | 0.04 | 2.40  | 0.013 |
| 164. LP ( 3) Mn 69 | /216. RY* ( 4) C 6         | 0.03 | 1.28  | 0.008 |
| 164. LP ( 3) Mn 69 | /596. BD* ( 1) C 6 - N 11  | 0.13 | 0.60  | 0.011 |
| 164. LP ( 3) Mn 69 | /606. BD* ( 1) N 11 - N 12 | 0.41 | 0.72  | 0.022 |
| 165. LP ( 5) Mn 69 | /214. RY* ( 2) C 6         | 0.05 | 1.37  | 0.011 |
| 165. LP ( 5) Mn 69 | /216. RY* ( 4) C 6         | 0.04 | 1.26  | 0.009 |
| 165. LP ( 5) Mn 69 | /253. RY* ( 1) N 11        | 0.92 | 1.57  | 0.049 |
| 165. LP ( 5) Mn 69 | /254. RY* ( 2) N 11        | 0.82 | 1.62  | 0.047 |
| 165. LP ( 5) Mn 69 | /255. RY* ( 3) N 11        | 0.40 | 1.48  | 0.031 |
| 165. LP ( 5) Mn 69 | /259. RY* ( 7) N 11        | 0.03 | 35.37 | 0.041 |
| 165. LP ( 5) Mn 69 | /261. RY* ( 1) N 12        | 0.03 | 1.04  | 0.007 |
| 165. LP ( 5) Mn 69 | /264. RY* ( 4) N 12        | 0.04 | 1.85  | 0.011 |
| 165. LP ( 5) Mn 69 | /285. RY* ( 1) C 15        | 0.16 | 1.38  | 0.019 |
| 165. LP ( 5) Mn 69 | /286. RY* ( 2) C 15        | 0.03 | 0.97  | 0.007 |
| 165. LP ( 5) Mn 69 | /592. BD* ( 2) C 4 - C 6   | 0.03 | 0.20  | 0.004 |
| 165. LP ( 5) Mn 69 | /596. BD* ( 1) C 6 - N 11  | 0.25 | 0.58  | 0.015 |
| 165. LP ( 5) Mn 69 | /607. BD* ( 1) N 12 - C 13 | 0.07 | 0.57  | 0.008 |
| 166. LP ( 6) Mn 69 | /183. RY* ( 3) C 2         | 0.08 | 0.16  | 0.013 |
| 166. LP ( 6) Mn 69 | /190. RY* ( 2) C 3         | 0.03 | 0.52  | 0.013 |
| 166. LP ( 6) Mn 69 | /197. RY* ( 1) C 4         | 0.06 | 0.79  | 0.023 |
| 166. LP ( 6) Mn 69 | /198. RY* ( 2) C 4         | 0.17 | 0.77  | 0.040 |
| 166. LP ( 6) Mn 69 | /200. RY* ( 4) C 4         | 0.04 | 0.20  | 0.010 |
| 166. LP ( 6) Mn 69 | /201. RY* ( 5) C 4         | 0.04 | 2.35  | 0.035 |
| 166. LP ( 6) Mn 69 | /207. RY* ( 3) C 5         | 0.26 | 0.43  | 0.036 |
| 166. LP ( 6) Mn 69 | /208. RY* ( 4) C 5         | 0.48 | 0.29  | 0.041 |
| 166. LP ( 6) Mn 69 | /213. RY* ( 1) C 6         | 3.87 | 0.12  | 0.074 |

|                       |    |   |    |    |    |       |     |   |    |   |           |       |       |       |
|-----------------------|----|---|----|----|----|-------|-----|---|----|---|-----------|-------|-------|-------|
| 166.                  | LP | ( | 6) | Mn | 69 | /214. | RY* | ( | 2) | C | 6         | 7.35  | 0.40  | 0.186 |
| 166.                  | LP | ( | 6) | Mn | 69 | /215. | RY* | ( | 3) | C | 6         | 0.26  | 0.35  | 0.033 |
| 166.                  | LP | ( | 6) | Mn | 69 | /216. | RY* | ( | 4) | C | 6         | 4.92  | 0.28  | 0.129 |
| 166.                  | LP | ( | 6) | Mn | 69 | /218. | RY* | ( | 6) | C | 6         | 0.46  | 2.45  | 0.117 |
| 166.                  | LP | ( | 6) | Mn | 69 | /220. | RY* | ( | 8) | C | 6         | 0.07  | 2.03  | 0.042 |
| 166.                  | LP | ( | 6) | Mn | 69 | /239. | RY* | ( | 3) | C | 9         | 0.28  | 0.31  | 0.032 |
| 166.                  | LP | ( | 6) | Mn | 69 | /240. | RY* | ( | 4) | C | 9         | 0.10  | 0.35  | 0.021 |
| 166.                  | LP | ( | 6) | Mn | 69 | /253. | RY* | ( | 1) | N | 11        | 20.18 | 0.59  | 0.373 |
| 166.                  | LP | ( | 6) | Mn | 69 | /254. | RY* | ( | 2) | N | 11        | 18.49 | 0.64  | 0.373 |
| 166.                  | LP | ( | 6) | Mn | 69 | /255. | RY* | ( | 3) | N | 11        | 15.27 | 0.50  | 0.304 |
| 166.                  | LP | ( | 6) | Mn | 69 | /256. | RY* | ( | 4) | N | 11        | 3.18  | 0.77  | 0.172 |
| 166.                  | LP | ( | 6) | Mn | 69 | /258. | RY* | ( | 6) | N | 11        | 0.04  | 3.21  | 0.039 |
| 166.                  | LP | ( | 6) | Mn | 69 | /261. | RY* | ( | 1) | N | 12        | 5.94  | 0.06  | 0.066 |
| 166.                  | LP | ( | 6) | Mn | 69 | /262. | RY* | ( | 2) | N | 12        | 11.07 | 0.02  | 0.052 |
| 166.                  | LP | ( | 6) | Mn | 69 | /263. | RY* | ( | 3) | N | 12        | 2.41  | 0.34  | 0.100 |
| 166.                  | LP | ( | 6) | Mn | 69 | /264. | RY* | ( | 4) | N | 12        | 0.63  | 0.87  | 0.081 |
| 166.                  | LP | ( | 6) | Mn | 69 | /265. | RY* | ( | 5) | N | 12        | 0.05  | 3.39  | 0.047 |
| 166.                  | LP | ( | 6) | Mn | 69 | /266. | RY* | ( | 6) | N | 12        | 0.03  | 3.07  | 0.032 |
| 166.                  | LP | ( | 6) | Mn | 69 | /269. | RY* | ( | 1) | C | 13        | 0.25  | 0.34  | 0.031 |
| 166.                  | LP | ( | 6) | Mn | 69 | /270. | RY* | ( | 2) | C | 13        | 0.28  | 0.67  | 0.047 |
| 166.                  | LP | ( | 6) | Mn | 69 | /271. | RY* | ( | 3) | C | 13        | 7.31  | 0.05  | 0.064 |
| 166.                  | LP | ( | 6) | Mn | 69 | /274. | RY* | ( | 6) | C | 13        | 0.07  | 2.58  | 0.047 |
| 166.                  | LP | ( | 6) | Mn | 69 | /280. | RY* | ( | 4) | C | 14        | 0.14  | 0.14  | 0.016 |
| 166.                  | LP | ( | 6) | Mn | 69 | /285. | RY* | ( | 1) | C | 15        | 14.71 | 0.40  | 0.263 |
| 166.                  | LP | ( | 6) | Mn | 69 | /287. | RY* | ( | 3) | C | 15        | 0.83  | 0.55  | 0.074 |
| 166.                  | LP | ( | 6) | Mn | 69 | /288. | RY* | ( | 4) | C | 15        | 0.38  | 0.27  | 0.035 |
| 166.                  | LP | ( | 6) | Mn | 69 | /289. | RY* | ( | 5) | C | 15        | 1.31  | 2.68  | 0.206 |
| 166.                  | LP | ( | 6) | Mn | 69 | /294. | RY* | ( | 2) | C | 16        | 0.11  | 0.45  | 0.024 |
| 166.                  | LP | ( | 6) | Mn | 69 | /296. | RY* | ( | 4) | C | 16        | 0.08  | 0.25  | 0.016 |
| 166.                  | LP | ( | 6) | Mn | 69 | /302. | RY* | ( | 2) | C | 17        | 0.46  | 0.57  | 0.056 |
| 166.                  | LP | ( | 6) | Mn | 69 | /304. | RY* | ( | 4) | C | 17        | 0.52  | 0.12  | 0.027 |
| 166.                  | LP | ( | 6) | Mn | 69 | /309. | RY* | ( | 1) | C | 18        | 0.07  | 0.43  | 0.019 |
| 166.                  | LP | ( | 6) | Mn | 69 | /317. | RY* | ( | 1) | O | 19        | 13.34 | 1.61  | 0.507 |
| 166.                  | LP | ( | 6) | Mn | 69 | /318. | RY* | ( | 2) | O | 19        | 0.05  | 0.33  | 0.013 |
| 166.                  | LP | ( | 6) | Mn | 69 | /319. | RY* | ( | 3) | O | 19        | 3.63  | 0.57  | 0.158 |
| 166.                  | LP | ( | 6) | Mn | 69 | /320. | RY* | ( | 4) | O | 19        | 0.83  | 1.04  | 0.102 |
| 170.                  | LP | ( | 1) | Mn | 69 | /253. | RY* | ( | 1) | N | 11        | 0.13  | 1.59  | 0.018 |
| 170.                  | LP | ( | 1) | Mn | 69 | /254. | RY* | ( | 2) | N | 11        | 0.13  | 1.64  | 0.018 |
| 170.                  | LP | ( | 1) | Mn | 69 | /255. | RY* | ( | 3) | N | 11        | 0.04  | 1.50  | 0.009 |
| 170.                  | LP | ( | 1) | Mn | 69 | /317. | RY* | ( | 1) | O | 19        | 0.11  | 2.60  | 0.021 |
| 170.                  | LP | ( | 1) | Mn | 69 | /596. | BD* | ( | 1) | C | 6 - N 11  | 0.04  | 0.60  | 0.006 |
| 170.                  | LP | ( | 1) | Mn | 69 | /606. | BD* | ( | 1) | N | 11 - N 12 | 0.10  | 0.72  | 0.011 |
| 170.                  | LP | ( | 1) | Mn | 69 | /614. | BD* | ( | 1) | C | 15 - O 19 | 0.04  | 0.55  | 0.006 |
| 171.                  | LP | ( | 2) | Mn | 69 | /253. | RY* | ( | 1) | N | 11        | 0.03  | 1.59  | 0.009 |
| 171.                  | LP | ( | 2) | Mn | 69 | /269. | RY* | ( | 1) | C | 13        | 0.05  | 1.33  | 0.010 |
| 171.                  | LP | ( | 2) | Mn | 69 | /289. | RY* | ( | 5) | C | 15        | 0.03  | 3.67  | 0.013 |
| 171.                  | LP | ( | 2) | Mn | 69 | /317. | RY* | ( | 1) | O | 19        | 0.04  | 2.60  | 0.013 |
| 171.                  | LP | ( | 2) | Mn | 69 | /596. | BD* | ( | 1) | C | 6 - N 11  | 0.17  | 0.60  | 0.013 |
| 171.                  | LP | ( | 2) | Mn | 69 | /606. | BD* | ( | 1) | N | 11 - N 12 | 0.33  | 0.72  | 0.020 |
| 171.                  | LP | ( | 2) | Mn | 69 | /613. | BD* | ( | 1) | C | 15 - C 17 | 0.04  | 0.68  | 0.007 |
| 171.                  | LP | ( | 2) | Mn | 69 | /614. | BD* | ( | 1) | C | 15 - O 19 | 0.13  | 0.55  | 0.011 |
| 172.                  | LP | ( | 4) | Mn | 69 | /253. | RY* | ( | 1) | N | 11        | 0.10  | 1.57  | 0.016 |
| 172.                  | LP | ( | 4) | Mn | 69 | /254. | RY* | ( | 2) | N | 11        | 0.12  | 1.62  | 0.018 |
| 172.                  | LP | ( | 4) | Mn | 69 | /255. | RY* | ( | 3) | N | 11        | 0.09  | 1.48  | 0.015 |
| 172.                  | LP | ( | 4) | Mn | 69 | /317. | RY* | ( | 1) | O | 19        | 0.61  | 2.58  | 0.051 |
| 172.                  | LP | ( | 4) | Mn | 69 | /318. | RY* | ( | 2) | O | 19        | 0.04  | 1.30  | 0.009 |
| 172.                  | LP | ( | 4) | Mn | 69 | /319. | RY* | ( | 3) | O | 19        | 0.05  | 1.55  | 0.011 |
| 172.                  | LP | ( | 4) | Mn | 69 | /324. | RY* | ( | 8) | O | 19        | 0.03  | 49.31 | 0.047 |
| 172.                  | LP | ( | 4) | Mn | 69 | /609. | BD* | ( | 1) | C | 13 - C 15 | 0.03  | 0.81  | 0.006 |
| 172.                  | LP | ( | 4) | Mn | 69 | /614. | BD* | ( | 1) | C | 15 - O 19 | 0.43  | 0.54  | 0.019 |
| from unit 5 to unit 2 |    |   |    |    |    |       |     |   |    |   |           |       |       |       |
| 132.                  | CR | ( | 2) | Mn | 69 | /633. | BD* | ( | 1) | C | 37 - N 42 | 0.13  | 26.80 | 0.076 |
| 132.                  | CR | ( | 2) | Mn | 69 | /643. | BD* | ( | 1) | N | 42 - N 43 | 0.07  | 26.93 | 0.056 |
| 132.                  | CR | ( | 2) | Mn | 69 | /652. | BD* | ( | 1) | C | 46 - O 65 | 0.14  | 26.75 | 0.077 |
| 133.                  | CR | ( | 3) | Mn | 69 | /437. | RY* | ( | 3) | N | 42        | 0.06  | 5.34  | 0.022 |
| 133.                  | CR | ( | 3) | Mn | 69 | /633. | BD* | ( | 1) | C | 37 - N 42 | 0.67  | 4.49  | 0.070 |
| 133.                  | CR | ( | 3) | Mn | 69 | /643. | BD* | ( | 1) | N | 42 - N 43 | 0.37  | 4.62  | 0.053 |
| 133.                  | CR | ( | 3) | Mn | 69 | /651. | BD* | ( | 1) | C | 46 - C 48 | 0.04  | 4.56  | 0.017 |
| 133.                  | CR | ( | 3) | Mn | 69 | /652. | BD* | ( | 1) | C | 46 - O 65 | 0.77  | 4.44  | 0.075 |
| 135.                  | CR | ( | 5) | Mn | 69 | /437. | RY* | ( | 3) | N | 42        | 0.06  | 3.30  | 0.017 |

|                   |                            |       |       |       |
|-------------------|----------------------------|-------|-------|-------|
| 135. CR ( 5)Mn 69 | /633. BD* ( 1) C 37 - N 42 | 0.16  | 2.45  | 0.025 |
| 135. CR ( 5)Mn 69 | /643. BD* ( 1) N 42 - N 43 | 0.21  | 2.58  | 0.030 |
| 135. CR ( 5)Mn 69 | /652. BD* ( 1) C 46 - O 65 | 0.11  | 2.40  | 0.020 |
| 137. CR ( 7)Mn 69 | /652. BD* ( 1) C 46 - O 65 | 0.05  | 2.40  | 0.014 |
| 139. CR ( 9)Mn 69 | /467. RY* ( 1) C 46        | 0.03  | 3.23  | 0.012 |
| 139. CR ( 9)Mn 69 | /633. BD* ( 1) C 37 - N 42 | 0.14  | 2.45  | 0.023 |
| 139. CR ( 9)Mn 69 | /652. BD* ( 1) C 46 - O 65 | 0.25  | 2.40  | 0.031 |
| 164. LP ( 3)Mn 69 | /435. RY* ( 1) N 42        | 0.03  | 2.12  | 0.011 |
| 164. LP ( 3)Mn 69 | /651. BD* ( 1) C 46 - C 48 | 0.03  | 0.68  | 0.006 |
| 164. LP ( 3)Mn 69 | /652. BD* ( 1) C 46 - O 65 | 0.23  | 0.56  | 0.014 |
| 165. LP ( 5)Mn 69 | / 54. BD* ( 2) C 35 - C 37 | 0.08  | 0.17  | 0.006 |
| 165. LP ( 5)Mn 69 | /396. RY* ( 2) C 37        | 0.04  | 1.30  | 0.009 |
| 165. LP ( 5)Mn 69 | /435. RY* ( 1) N 42        | 1.41  | 2.11  | 0.069 |
| 165. LP ( 5)Mn 69 | /436. RY* ( 2) N 42        | 0.26  | 1.16  | 0.022 |
| 165. LP ( 5)Mn 69 | /437. RY* ( 3) N 42        | 0.46  | 1.44  | 0.033 |
| 165. LP ( 5)Mn 69 | /441. RY* ( 7) N 42        | 0.03  | 35.43 | 0.045 |
| 165. LP ( 5)Mn 69 | /443. RY* ( 1) N 43        | 0.05  | 1.08  | 0.009 |
| 165. LP ( 5)Mn 69 | /445. RY* ( 3) N 43        | 0.06  | 1.30  | 0.011 |
| 165. LP ( 5)Mn 69 | /446. RY* ( 4) N 43        | 0.03  | 1.82  | 0.009 |
| 165. LP ( 5)Mn 69 | /467. RY* ( 1) C 46        | 0.07  | 1.37  | 0.013 |
| 165. LP ( 5)Mn 69 | /470. RY* ( 4) C 46        | 0.05  | 0.97  | 0.009 |
| 165. LP ( 5)Mn 69 | /541. RY* ( 1) O 65        | 0.09  | 2.60  | 0.020 |
| 165. LP ( 5)Mn 69 | /544. RY* ( 4) O 65        | 0.05  | 1.90  | 0.013 |
| 165. LP ( 5)Mn 69 | /633. BD* ( 1) C 37 - N 42 | 0.20  | 0.59  | 0.014 |
| 165. LP ( 5)Mn 69 | /644. BD* ( 1) N 43 - C 44 | 0.08  | 0.58  | 0.009 |
| 165. LP ( 5)Mn 69 | /652. BD* ( 1) C 46 - O 65 | 0.17  | 0.54  | 0.012 |
| 166. LP ( 6)Mn 69 | /380. RY* ( 2) C 35        | 0.08  | 0.82  | 0.028 |
| 166. LP ( 6)Mn 69 | /381. RY* ( 3) C 35        | 0.13  | 0.80  | 0.035 |
| 166. LP ( 6)Mn 69 | /382. RY* ( 4) C 35        | 0.06  | 0.16  | 0.011 |
| 166. LP ( 6)Mn 69 | /383. RY* ( 5) C 35        | 0.03  | 2.35  | 0.031 |
| 166. LP ( 6)Mn 69 | /389. RY* ( 3) C 36        | 0.68  | 0.45  | 0.061 |
| 166. LP ( 6)Mn 69 | /390. RY* ( 4) C 36        | 0.26  | 0.35  | 0.033 |
| 166. LP ( 6)Mn 69 | /395. RY* ( 1) C 37        | 3.79  | 0.13  | 0.076 |
| 166. LP ( 6)Mn 69 | /396. RY* ( 2) C 37        | 9.94  | 0.32  | 0.196 |
| 166. LP ( 6)Mn 69 | /397. RY* ( 3) C 37        | 0.63  | 0.36  | 0.053 |
| 166. LP ( 6)Mn 69 | /398. RY* ( 4) C 37        | 2.23  | 0.28  | 0.087 |
| 166. LP ( 6)Mn 69 | /400. RY* ( 6) C 37        | 0.58  | 2.37  | 0.129 |
| 166. LP ( 6)Mn 69 | /402. RY* ( 8) C 37        | 0.07  | 2.02  | 0.043 |
| 166. LP ( 6)Mn 69 | /421. RY* ( 3) C 40        | 0.27  | 0.35  | 0.033 |
| 166. LP ( 6)Mn 69 | /422. RY* ( 4) C 40        | 0.03  | 0.31  | 0.010 |
| 166. LP ( 6)Mn 69 | /426. RY* ( 8) C 40        | 0.06  | 2.23  | 0.041 |
| 166. LP ( 6)Mn 69 | /435. RY* ( 1) N 42        | 19.29 | 1.13  | 0.505 |
| 166. LP ( 6)Mn 69 | /436. RY* ( 2) N 42        | 14.14 | 0.18  | 0.174 |
| 166. LP ( 6)Mn 69 | /437. RY* ( 3) N 42        | 17.76 | 0.46  | 0.313 |
| 166. LP ( 6)Mn 69 | /438. RY* ( 4) N 42        | 2.95  | 0.73  | 0.162 |
| 166. LP ( 6)Mn 69 | /440. RY* ( 6) N 42        | 0.04  | 3.26  | 0.038 |
| 166. LP ( 6)Mn 69 | /443. RY* ( 1) N 43        | 5.71  | 0.10  | 0.083 |
| 166. LP ( 6)Mn 69 | /444. RY* ( 2) N 43        | 5.14  | 0.04  | 0.051 |
| 166. LP ( 6)Mn 69 | /445. RY* ( 3) N 43        | 4.11  | 0.33  | 0.127 |
| 166. LP ( 6)Mn 69 | /446. RY* ( 4) N 43        | 0.40  | 0.84  | 0.064 |
| 166. LP ( 6)Mn 69 | /447. RY* ( 5) N 43        | 0.07  | 3.44  | 0.054 |
| 166. LP ( 6)Mn 69 | /449. RY* ( 7) N 43        | 0.03  | 3.04  | 0.035 |
| 166. LP ( 6)Mn 69 | /451. RY* ( 1) C 44        | 0.03  | 0.36  | 0.011 |
| 166. LP ( 6)Mn 69 | /452. RY* ( 2) C 44        | 0.07  | 0.63  | 0.023 |
| 166. LP ( 6)Mn 69 | /453. RY* ( 3) C 44        | 5.49  | 0.12  | 0.090 |
| 166. LP ( 6)Mn 69 | /455. RY* ( 5) C 44        | 0.06  | 1.97  | 0.038 |
| 166. LP ( 6)Mn 69 | /456. RY* ( 6) C 44        | 0.05  | 3.09  | 0.043 |
| 166. LP ( 6)Mn 69 | /460. RY* ( 2) C 45        | 0.03  | 0.43  | 0.013 |
| 166. LP ( 6)Mn 69 | /462. RY* ( 4) C 45        | 0.32  | 0.16  | 0.025 |
| 166. LP ( 6)Mn 69 | /467. RY* ( 1) C 46        | 14.08 | 0.39  | 0.255 |
| 166. LP ( 6)Mn 69 | /468. RY* ( 2) C 46        | 1.22  | 0.68  | 0.100 |
| 166. LP ( 6)Mn 69 | /469. RY* ( 3) C 46        | 0.06  | 0.16  | 0.011 |
| 166. LP ( 6)Mn 69 | /471. RY* ( 5) C 46        | 0.51  | 4.08  | 0.159 |
| 166. LP ( 6)Mn 69 | /472. RY* ( 6) C 46        | 0.04  | 2.01  | 0.032 |
| 166. LP ( 6)Mn 69 | /475. RY* ( 1) C 47        | 0.10  | 0.43  | 0.023 |
| 166. LP ( 6)Mn 69 | /478. RY* ( 4) C 47        | 0.09  | 0.16  | 0.013 |
| 166. LP ( 6)Mn 69 | /483. RY* ( 1) C 48        | 0.50  | 0.57  | 0.058 |
| 166. LP ( 6)Mn 69 | /486. RY* ( 4) C 48        | 0.29  | 0.17  | 0.024 |
| 166. LP ( 6)Mn 69 | /491. RY* ( 1) C 49        | 0.07  | 0.43  | 0.019 |
| 166. LP ( 6)Mn 69 | /514. RY* ( 2) H 54        | 0.14  | 1.56  | 0.051 |
| 166. LP ( 6)Mn 69 | /541. RY* ( 1) O 65        | 13.31 | 1.62  | 0.509 |



|      |    |   |      |    |       |     |   |    |   |           |      |      |       |
|------|----|---|------|----|-------|-----|---|----|---|-----------|------|------|-------|
| 166. | LP | ( | 6)Mn | 69 | /542. | RY* | ( | 2) | O | 65        | 0.14 | 0.31 | 0.023 |
| 166. | LP | ( | 6)Mn | 69 | /543. | RY* | ( | 3) | O | 65        | 3.01 | 0.64 | 0.152 |
| 166. | LP | ( | 6)Mn | 69 | /544. | RY* | ( | 4) | O | 65        | 1.70 | 0.92 | 0.138 |
| 166. | LP | ( | 6)Mn | 69 | /545. | RY* | ( | 5) | O | 65        | 0.06 | 4.27 | 0.055 |
| 170. | LP | ( | 1)Mn | 69 | /435. | RY* | ( | 1) | N | 42        | 0.09 | 2.12 | 0.017 |
| 170. | LP | ( | 1)Mn | 69 | /541. | RY* | ( | 1) | O | 65        | 0.07 | 2.62 | 0.017 |
| 170. | LP | ( | 1)Mn | 69 | /633. | BD* | ( | 1) | C | 37 - N 42 | 0.10 | 0.61 | 0.010 |
| 170. | LP | ( | 1)Mn | 69 | /643. | BD* | ( | 1) | N | 42 - N 43 | 0.38 | 0.74 | 0.021 |
| 171. | LP | ( | 2)Mn | 69 | /396. | RY* | ( | 2) | C | 37        | 0.03 | 1.32 | 0.008 |
| 171. | LP | ( | 2)Mn | 69 | /435. | RY* | ( | 1) | N | 42        | 0.06 | 2.12 | 0.014 |
| 171. | LP | ( | 2)Mn | 69 | /437. | RY* | ( | 3) | N | 42        | 0.04 | 1.45 | 0.010 |
| 171. | LP | ( | 2)Mn | 69 | /451. | RY* | ( | 1) | C | 44        | 0.07 | 1.35 | 0.012 |
| 171. | LP | ( | 2)Mn | 69 | /633. | BD* | ( | 1) | C | 37 - N 42 | 0.26 | 0.61 | 0.016 |
| 171. | LP | ( | 2)Mn | 69 | /643. | BD* | ( | 1) | N | 42 - N 43 | 0.25 | 0.74 | 0.017 |
| 171. | LP | ( | 2)Mn | 69 | /651. | BD* | ( | 1) | C | 46 - C 48 | 0.03 | 0.68 | 0.006 |
| 172. | LP | ( | 4)Mn | 69 | /435. | RY* | ( | 1) | N | 42        | 0.18 | 2.11 | 0.025 |
| 172. | LP | ( | 4)Mn | 69 | /436. | RY* | ( | 2) | N | 42        | 0.03 | 1.16 | 0.008 |
| 172. | LP | ( | 4)Mn | 69 | /467. | RY* | ( | 1) | C | 46        | 0.07 | 1.37 | 0.012 |
| 172. | LP | ( | 4)Mn | 69 | /541. | RY* | ( | 1) | O | 65        | 0.53 | 2.60 | 0.047 |
| 172. | LP | ( | 4)Mn | 69 | /543. | RY* | ( | 3) | O | 65        | 0.07 | 1.61 | 0.013 |
| 172. | LP | ( | 4)Mn | 69 | /643. | BD* | ( | 1) | N | 42 - N 43 | 0.15 | 0.72 | 0.013 |
| 172. | LP | ( | 4)Mn | 69 | /647. | BD* | ( | 2) | C | 44 - C 46 | 0.03 | 0.23 | 0.004 |
| 172. | LP | ( | 4)Mn | 69 | /652. | BD* | ( | 1) | C | 46 - O 65 | 0.15 | 0.54 | 0.011 |

from unit 5 to unit 3

|      |    |   |      |    |       |     |   |    |   |           |       |      |       |
|------|----|---|------|----|-------|-----|---|----|---|-----------|-------|------|-------|
| 135. | CR | ( | 5)Mn | 69 | /660. | BD* | ( | 1) | O | 62 - H 63 | 0.05  | 2.40 | 0.013 |
| 139. | CR | ( | 9)Mn | 69 | /661. | BD* | ( | 1) | O | 62 - H 64 | 0.03  | 2.40 | 0.011 |
| 164. | LP | ( | 3)Mn | 69 | /660. | BD* | ( | 1) | O | 62 - H 63 | 0.17  | 0.56 | 0.012 |
| 164. | LP | ( | 3)Mn | 69 | /661. | BD* | ( | 1) | O | 62 - H 64 | 0.28  | 0.56 | 0.016 |
| 165. | LP | ( | 5)Mn | 69 | /529. | RY* | ( | 1) | O | 62        | 0.03  | 2.24 | 0.010 |
| 165. | LP | ( | 5)Mn | 69 | /531. | RY* | ( | 3) | O | 62        | 0.03  | 1.57 | 0.008 |
| 165. | LP | ( | 5)Mn | 69 | /532. | RY* | ( | 4) | O | 62        | 0.11  | 1.57 | 0.016 |
| 165. | LP | ( | 5)Mn | 69 | /537. | RY* | ( | 1) | H | 63        | 0.20  | 0.77 | 0.016 |
| 165. | LP | ( | 5)Mn | 69 | /539. | RY* | ( | 1) | H | 64        | 0.10  | 0.77 | 0.011 |
| 165. | LP | ( | 5)Mn | 69 | /660. | BD* | ( | 1) | O | 62 - H 63 | 0.21  | 0.54 | 0.013 |
| 165. | LP | ( | 5)Mn | 69 | /661. | BD* | ( | 1) | O | 62 - H 64 | 0.13  | 0.54 | 0.011 |
| 166. | LP | ( | 6)Mn | 69 | /529. | RY* | ( | 1) | O | 62        | 24.33 | 1.26 | 0.608 |
| 166. | LP | ( | 6)Mn | 69 | /530. | RY* | ( | 2) | O | 62        | 0.53  | 0.25 | 0.040 |
| 166. | LP | ( | 6)Mn | 69 | /531. | RY* | ( | 3) | O | 62        | 5.88  | 0.59 | 0.205 |
| 166. | LP | ( | 6)Mn | 69 | /532. | RY* | ( | 4) | O | 62        | 12.07 | 0.59 | 0.295 |
| 166. | LP | ( | 6)Mn | 69 | /538. | RY* | ( | 2) | H | 63        | 0.04  | 1.44 | 0.025 |
| 170. | LP | ( | 1)Mn | 69 | /531. | RY* | ( | 3) | O | 62        | 0.05  | 1.59 | 0.011 |
| 170. | LP | ( | 1)Mn | 69 | /532. | RY* | ( | 4) | O | 62        | 0.03  | 1.59 | 0.009 |
| 170. | LP | ( | 1)Mn | 69 | /537. | RY* | ( | 1) | H | 63        | 0.04  | 0.78 | 0.007 |
| 170. | LP | ( | 1)Mn | 69 | /660. | BD* | ( | 1) | O | 62 - H 63 | 0.04  | 0.56 | 0.006 |
| 170. | LP | ( | 1)Mn | 69 | /661. | BD* | ( | 1) | O | 62 - H 64 | 0.03  | 0.56 | 0.005 |
| 171. | LP | ( | 2)Mn | 69 | /529. | RY* | ( | 1) | O | 62        | 0.04  | 2.26 | 0.012 |
| 171. | LP | ( | 2)Mn | 69 | /661. | BD* | ( | 1) | O | 62 - H 64 | 0.10  | 0.56 | 0.010 |
| 172. | LP | ( | 4)Mn | 69 | /529. | RY* | ( | 1) | O | 62        | 0.22  | 2.24 | 0.028 |
| 172. | LP | ( | 4)Mn | 69 | /532. | RY* | ( | 4) | O | 62        | 0.03  | 1.57 | 0.009 |
| 172. | LP | ( | 4)Mn | 69 | /537. | RY* | ( | 1) | H | 63        | 0.04  | 0.77 | 0.007 |
| 172. | LP | ( | 4)Mn | 69 | /660. | BD* | ( | 1) | O | 62 - H 63 | 0.10  | 0.54 | 0.009 |

from unit 5 to unit 4

|      |    |   |      |    |       |     |   |    |   |           |       |      |       |
|------|----|---|------|----|-------|-----|---|----|---|-----------|-------|------|-------|
| 137. | CR | ( | 7)Mn | 69 | /663. | BD* | ( | 1) | H | 67 - O 68 | 0.03  | 2.40 | 0.010 |
| 139. | CR | ( | 9)Mn | 69 | /662. | BD* | ( | 1) | H | 66 - O 68 | 0.05  | 2.41 | 0.013 |
| 164. | LP | ( | 3)Mn | 69 | /662. | BD* | ( | 1) | H | 66 - O 68 | 0.11  | 0.56 | 0.010 |
| 164. | LP | ( | 3)Mn | 69 | /663. | BD* | ( | 1) | H | 67 - O 68 | 0.33  | 0.56 | 0.017 |
| 165. | LP | ( | 5)Mn | 69 | /549. | RY* | ( | 1) | H | 66        | 0.18  | 0.90 | 0.016 |
| 165. | LP | ( | 5)Mn | 69 | /551. | RY* | ( | 1) | H | 67        | 0.18  | 0.84 | 0.016 |
| 165. | LP | ( | 5)Mn | 69 | /553. | RY* | ( | 1) | O | 68        | 0.17  | 2.14 | 0.024 |
| 165. | LP | ( | 5)Mn | 69 | /555. | RY* | ( | 3) | O | 68        | 0.04  | 1.27 | 0.009 |
| 165. | LP | ( | 5)Mn | 69 | /556. | RY* | ( | 4) | O | 68        | 0.05  | 2.01 | 0.013 |
| 165. | LP | ( | 5)Mn | 69 | /662. | BD* | ( | 1) | H | 66 - O 68 | 0.07  | 0.55 | 0.008 |
| 165. | LP | ( | 5)Mn | 69 | /663. | BD* | ( | 1) | H | 67 - O 68 | 0.03  | 0.55 | 0.005 |
| 166. | LP | ( | 6)Mn | 69 | /550. | RY* | ( | 2) | H | 66        | 0.13  | 1.40 | 0.046 |
| 166. | LP | ( | 6)Mn | 69 | /552. | RY* | ( | 2) | H | 67        | 0.08  | 1.44 | 0.037 |
| 166. | LP | ( | 6)Mn | 69 | /553. | RY* | ( | 1) | O | 68        | 24.02 | 1.16 | 0.579 |
| 166. | LP | ( | 6)Mn | 69 | /554. | RY* | ( | 2) | O | 68        | 1.90  | 0.22 | 0.070 |
| 166. | LP | ( | 6)Mn | 69 | /555. | RY* | ( | 3) | O | 68        | 1.63  | 0.29 | 0.076 |
| 166. | LP | ( | 6)Mn | 69 | /556. | RY* | ( | 4) | O | 68        | 8.27  | 1.04 | 0.322 |

|               |    |   |    |    |    |       |     |   |     |    |           |       |        |       |
|---------------|----|---|----|----|----|-------|-----|---|-----|----|-----------|-------|--------|-------|
| 170.          | LP | ( | 1) | Mn | 69 | /549. | RY* | ( | 1)  | H  | 66        | 0.03  | 0.92   | 0.006 |
| 170.          | LP | ( | 1) | Mn | 69 | /553. | RY* | ( | 1)  | O  | 68        | 0.03  | 2.16   | 0.011 |
| 170.          | LP | ( | 1) | Mn | 69 | /662. | BD* | ( | 1)  | H  | 66 - O 68 | 0.04  | 0.56   | 0.006 |
| 170.          | LP | ( | 1) | Mn | 69 | /663. | BD* | ( | 1)  | H  | 67 - O 68 | 0.03  | 0.56   | 0.005 |
| 171.          | LP | ( | 2) | Mn | 69 | /662. | BD* | ( | 1)  | H  | 66 - O 68 | 0.14  | 0.56   | 0.011 |
| 172.          | LP | ( | 4) | Mn | 69 | /551. | RY* | ( | 1)  | H  | 67        | 0.03  | 0.84   | 0.006 |
| 172.          | LP | ( | 4) | Mn | 69 | /553. | RY* | ( | 1)  | O  | 68        | 0.10  | 2.14   | 0.018 |
| 172.          | LP | ( | 4) | Mn | 69 | /662. | BD* | ( | 1)  | H  | 66 - O 68 | 0.13  | 0.55   | 0.011 |
| 172.          | LP | ( | 4) | Mn | 69 | /663. | BD* | ( | 1)  | H  | 67 - O 68 | 0.08  | 0.55   | 0.008 |
| within unit 5 |    |   |    |    |    |       |     |   |     |    |           |       |        |       |
| 132.          | CR | ( | 2) | Mn | 69 | /166. | LP  | ( | 6)  | Mn | 69        | 0.58  | 27.19  | 0.170 |
| 133.          | CR | ( | 3) | Mn | 69 | /166. | LP  | ( | 6)  | Mn | 69        | 2.21  | 4.88   | 0.140 |
| 165.          | LP | ( | 5) | Mn | 69 | /166. | LP  | ( | 6)  | Mn | 69        | 0.66  | 0.98   | 0.034 |
| 165.          | LP | ( | 5) | Mn | 69 | /167. | LP* | ( | 7)  | Mn | 69        | 0.25  | 0.75   | 0.018 |
| 165.          | LP | ( | 5) | Mn | 69 | /562. | RY* | ( | 2)  | Mn | 69        | 0.48  | 3.20   | 0.050 |
| 165.          | LP | ( | 5) | Mn | 69 | /581. | RY* | ( | 21) | Mn | 69        | 0.44  | 38.59  | 0.168 |
| 166.          | LP | ( | 6) | Mn | 69 | /169. | LP* | ( | 9)  | Mn | 69        | 0.36  | 0.98   | 0.065 |
| 166.          | LP | ( | 6) | Mn | 69 | /562. | RY* | ( | 2)  | Mn | 69        | 37.97 | 2.22   | 1.010 |
| 166.          | LP | ( | 6) | Mn | 69 | /564. | RY* | ( | 4)  | Mn | 69        | 1.40  | 1.43   | 0.156 |
| 166.          | LP | ( | 6) | Mn | 69 | /565. | RY* | ( | 5)  | Mn | 69        | 2.05  | 1.05   | 0.161 |
| 166.          | LP | ( | 6) | Mn | 69 | /567. | RY* | ( | 7)  | Mn | 69        | 6.26  | 1.25   | 0.308 |
| 166.          | LP | ( | 6) | Mn | 69 | /568. | RY* | ( | 8)  | Mn | 69        | 0.28  | 5.92   | 0.142 |
| 166.          | LP | ( | 6) | Mn | 69 | /574. | RY* | ( | 14) | Mn | 69        | 0.38  | 5.16   | 0.153 |
| 166.          | LP | ( | 6) | Mn | 69 | /575. | RY* | ( | 15) | Mn | 69        | 3.06  | 4.79   | 0.422 |
| 166.          | LP | ( | 6) | Mn | 69 | /578. | RY* | ( | 18) | Mn | 69        | 7.02  | 677.96 | 7.604 |
| 166.          | LP | ( | 6) | Mn | 69 | /580. | RY* | ( | 20) | Mn | 69        | 13.87 | 148.20 | 4.995 |
| 166.          | LP | ( | 6) | Mn | 69 | /581. | RY* | ( | 21) | Mn | 69        | 26.43 | 37.61  | 3.474 |

**Table (S10):** Summary of Natural Population Analysis of the Fe(III) complex:

Fe(III) complex

| Atom | No | Natural Charge | Core    | Valence | Rydberg | Total   |
|------|----|----------------|---------|---------|---------|---------|
| C    | 1  | 0.34207        | 1.99860 | 3.64275 | 0.01658 | 5.65793 |
| C    | 2  | -0.09671       | 1.99880 | 4.08565 | 0.01226 | 6.09671 |
| C    | 3  | -0.25998       | 1.99898 | 4.24769 | 0.01331 | 6.25998 |
| C    | 4  | -0.05333       | 1.99882 | 4.04048 | 0.01403 | 6.05333 |
| C    | 5  | -0.17914       | 1.99890 | 4.16773 | 0.01251 | 6.17914 |
| C    | 6  | 0.15212        | 1.99874 | 3.82795 | 0.02118 | 5.84788 |
| C    | 7  | -0.19673       | 1.99903 | 4.18365 | 0.01405 | 6.19673 |
| C    | 8  | -0.19280       | 1.99908 | 4.18014 | 0.01358 | 6.19280 |
| C    | 9  | -0.18513       | 1.99902 | 4.17168 | 0.01443 | 6.18513 |
| C    | 10 | -0.19384       | 1.99905 | 4.18165 | 0.01314 | 6.19384 |
| N    | 11 | -0.48047       | 1.99931 | 5.45278 | 0.02839 | 7.48047 |
| N    | 12 | -0.16012       | 1.99929 | 5.13818 | 0.02265 | 7.16012 |
| C    | 13 | 0.00772        | 1.99869 | 3.97330 | 0.02029 | 5.99228 |
| C    | 14 | -0.18372       | 1.99902 | 4.17066 | 0.01404 | 6.18372 |
| C    | 15 | 0.24243        | 1.99864 | 3.73645 | 0.02247 | 5.75757 |
| C    | 16 | -0.21395       | 1.99908 | 4.20151 | 0.01336 | 6.21395 |
| C    | 17 | -0.22742       | 1.99900 | 4.21412 | 0.01430 | 6.22742 |
| C    | 18 | -0.19654       | 1.99908 | 4.18401 | 0.01344 | 6.19654 |
| O    | 19 | -0.79132       | 1.99982 | 6.78416 | 0.00735 | 8.79132 |
| O    | 20 | -0.69894       | 1.99978 | 6.69558 | 0.00358 | 8.69894 |
| H    | 21 | 0.22893        | 0.00000 | 0.76855 | 0.00251 | 0.77107 |
| H    | 22 | 0.20887        | 0.00000 | 0.78825 | 0.00289 | 0.79113 |
| H    | 23 | 0.21648        | 0.00000 | 0.78235 | 0.00117 | 0.78352 |
| H    | 24 | 0.22458        | 0.00000 | 0.77168 | 0.00374 | 0.77542 |
| H    | 25 | 0.21629        | 0.00000 | 0.78191 | 0.00180 | 0.78371 |
| H    | 26 | 0.22391        | 0.00000 | 0.77356 | 0.00253 | 0.77609 |
| H    | 27 | 0.21707        | 0.00000 | 0.78177 | 0.00116 | 0.78293 |
| H    | 28 | 0.22621        | 0.00000 | 0.77160 | 0.00220 | 0.77379 |
| H    | 29 | 0.21600        | 0.00000 | 0.78275 | 0.00125 | 0.78400 |

|    |    |          |          |         |         |          |
|----|----|----------|----------|---------|---------|----------|
| H  | 30 | 0.49103  | 0.00000  | 0.50812 | 0.00085 | 0.50897  |
| H  | 31 | 0.22581  | 0.00000  | 0.77201 | 0.00219 | 0.77419  |
| C  | 32 | 0.34781  | 1.99860  | 3.63709 | 0.01651 | 5.65219  |
| C  | 33 | -0.09342 | 1.99880  | 4.08238 | 0.01223 | 6.09342  |
| C  | 34 | -0.25873 | 1.99897  | 4.24623 | 0.01352 | 6.25873  |
| C  | 35 | -0.05022 | 1.99883  | 4.03808 | 0.01332 | 6.05022  |
| C  | 36 | -0.20384 | 1.99890  | 4.19230 | 0.01264 | 6.20384  |
| C  | 37 | 0.14609  | 1.99874  | 3.83425 | 0.02092 | 5.85391  |
| C  | 38 | -0.19686 | 1.99903  | 4.18388 | 0.01396 | 6.19686  |
| C  | 39 | -0.18714 | 1.99908  | 4.17450 | 0.01357 | 6.18714  |
| C  | 40 | -0.17247 | 1.99902  | 4.15975 | 0.01370 | 6.17247  |
| C  | 41 | -0.19472 | 1.99906  | 4.18225 | 0.01341 | 6.19472  |
| N  | 42 | -0.36179 | 1.99928  | 5.33589 | 0.02662 | 7.36179  |
| N  | 43 | -0.21511 | 1.99928  | 5.19181 | 0.02402 | 7.21511  |
| C  | 44 | 0.12654  | 1.99874  | 3.85565 | 0.01907 | 5.87346  |
| C  | 45 | -0.20723 | 1.99902  | 4.19384 | 0.01437 | 6.20723  |
| C  | 46 | 0.27385  | 1.99865  | 3.70604 | 0.02147 | 5.72615  |
| C  | 47 | -0.14118 | 1.99908  | 4.12939 | 0.01271 | 6.14118  |
| C  | 48 | -0.20031 | 1.99900  | 4.18664 | 0.01466 | 6.20031  |
| C  | 49 | -0.21049 | 1.99907  | 4.19812 | 0.01330 | 6.21049  |
| O  | 50 | -0.69603 | 1.99978  | 6.69270 | 0.00355 | 8.69603  |
| H  | 51 | 0.23091  | 0.00000  | 0.76663 | 0.00247 | 0.76909  |
| H  | 52 | 0.20890  | 0.00000  | 0.78821 | 0.00289 | 0.79110  |
| H  | 53 | 0.21696  | 0.00000  | 0.78183 | 0.00121 | 0.78304  |
| H  | 54 | 0.22818  | 0.00000  | 0.76889 | 0.00294 | 0.77182  |
| H  | 55 | 0.21657  | 0.00000  | 0.78219 | 0.00123 | 0.78343  |
| H  | 56 | 0.23065  | 0.00000  | 0.76672 | 0.00263 | 0.76935  |
| H  | 57 | 0.22253  | 0.00000  | 0.77635 | 0.00112 | 0.77747  |
| H  | 58 | 0.23335  | 0.00000  | 0.76363 | 0.00302 | 0.76665  |
| H  | 59 | 0.22087  | 0.00000  | 0.77785 | 0.00127 | 0.77913  |
| H  | 60 | 0.49274  | 0.00000  | 0.50645 | 0.00081 | 0.50726  |
| H  | 61 | 0.22603  | 0.00000  | 0.77076 | 0.00321 | 0.77397  |
| O  | 62 | -0.91532 | 1.99980  | 6.90886 | 0.00666 | 8.91532  |
| H  | 63 | 0.52542  | 0.00000  | 0.47249 | 0.00209 | 0.47458  |
| H  | 64 | 0.50767  | 0.00000  | 0.48942 | 0.00291 | 0.49233  |
| O  | 65 | -0.64494 | 1.99981  | 6.63860 | 0.00653 | 8.64494  |
| Cl | 66 | -0.58061 | 9.99977  | 7.57826 | 0.00258 | 17.58061 |
| Fe | 67 | 1.74594  | 17.99113 | 6.24533 | 0.01760 | 24.25406 |

=====  
\* Total \*      0.00000      109.95218      216.36588      0.68194      327.00000  
=====

**Table (S11):** NBO data of the Fe(III) complex:

| Donor NBO (i) |           | Acceptor NBO (j) |    | kcal/mol         | a.u.      | a.u.            |
|---------------|-----------|------------------|----|------------------|-----------|-----------------|
| within unit 1 |           |                  |    |                  |           |                 |
| 1.            | BD ( 1) C | 1 - C            | 2  | /189. RY* ( 1) C | 3         | 0.67 1.97 0.046 |
| 1.            | BD ( 1) C | 1 - C            | 2  | /190. RY* ( 2) C | 3         | 0.31 2.00 0.032 |
| 1.            | BD ( 1) C | 1 - C            | 2  | /197. RY* ( 1) C | 4         | 0.65 2.18 0.048 |
| 1.            | BD ( 1) C | 1 - C            | 2  | /221. RY* ( 1) C | 7         | 0.57 1.85 0.041 |
| 1.            | BD ( 1) C | 1 - C            | 2  | /583. BD* ( 1) C | 1 - C 3   | 1.87 1.27 0.062 |
| 1.            | BD ( 1) C | 1 - C            | 2  | /586. BD* ( 1) C | 2 - C 4   | 1.75 1.27 0.060 |
| 1.            | BD ( 1) C | 1 - C            | 2  | /588. BD* ( 1) C | 2 - C 7   | 0.74 1.09 0.036 |
| 1.            | BD ( 1) C | 1 - C            | 2  | /590. BD* ( 1) C | 3 - H 21  | 1.44 1.09 0.050 |
| 1.            | BD ( 1) C | 1 - C            | 2  | /592. BD* ( 1) C | 4 - C 9   | 2.09 1.10 0.061 |
| 1.            | BD ( 1) C | 1 - C            | 2  | /597. BD* ( 1) C | 7 - C 8   | 0.65 1.29 0.037 |
| 2.            | BD ( 1) C | 1 - C            | 3  | /182. RY* ( 2) C | 2         | 0.80 2.19 0.053 |
| 2.            | BD ( 1) C | 1 - C            | 3  | /206. RY* ( 2) C | 5         | 0.61 1.97 0.044 |
| 2.            | BD ( 1) C | 1 - C            | 3  | /582. BD* ( 1) C | 1 - C 2   | 1.84 1.18 0.059 |
| 2.            | BD ( 1) C | 1 - C            | 3  | /585. BD* ( 1) C | 1 - O 20  | 0.42 1.03 0.026 |
| 2.            | BD ( 1) C | 1 - C            | 3  | /588. BD* ( 1) C | 2 - C 7   | 1.22 1.20 0.048 |
| 2.            | BD ( 1) C | 1 - C            | 3  | /589. BD* ( 1) C | 3 - C 5   | 1.21 1.22 0.049 |
| 2.            | BD ( 1) C | 1 - C            | 3  | /590. BD* ( 1) C | 3 - H 21  | 0.89 1.19 0.041 |
| 2.            | BD ( 1) C | 1 - C            | 3  | /595. BD* ( 1) C | 5 - H 31  | 0.70 1.20 0.037 |
| 2.            | BD ( 1) C | 1 - C            | 3  | /622. BD* ( 1) O | 20 - H 30 | 0.80 1.07 0.037 |
| 3.            | BD ( 2) C | 1 - C            | 3  | /184. RY* ( 4) C | 2         | 0.35 0.89 0.023 |
| 3.            | BD ( 2) C | 1 - C            | 3  | /325. RY* ( 1) O | 20        | 0.33 1.19 0.026 |
| 3.            | BD ( 2) C | 1 - C            | 3  | /584. BD* ( 2) C | 1 - C 3   | 0.28 0.31 0.012 |
| 3.            | BD ( 2) C | 1 - C            | 3  | /587. BD* ( 2) C | 2 - C 4   | 5.77 0.32 0.057 |
| 3.            | BD ( 2) C | 1 - C            | 3  | /594. BD* ( 2) C | 5 - C 6   | 6.65 0.32 0.059 |
| 4.            | BD ( 1) C | 1 - O            | 20 | /173. RY* ( 1) C | 1         | 0.33 1.97 0.032 |
| 4.            | BD ( 1) C | 1 - O            | 20 | /189. RY* ( 1) C | 3         | 0.29 2.21 0.032 |
| 4.            | BD ( 1) C | 1 - O            | 20 | /582. BD* ( 1) C | 1 - C 2   | 0.27 1.32 0.024 |
| 4.            | BD ( 1) C | 1 - O            | 20 | /583. BD* ( 1) C | 1 - C 3   | 0.54 1.52 0.036 |
| 4.            | BD ( 1) C | 1 - O            | 20 | /586. BD* ( 1) C | 2 - C 4   | 0.58 1.52 0.038 |
| 4.            | BD ( 1) C | 1 - O            | 20 | /589. BD* ( 1) C | 3 - C 5   | 1.10 1.36 0.049 |
| 5.            | BD ( 1) C | 2 - C            | 4  | /174. RY* ( 2) C | 1         | 0.44 2.15 0.039 |
| 5.            | BD ( 1) C | 2 - C            | 4  | /213. RY* ( 1) C | 6         | 0.40 1.88 0.035 |
| 5.            | BD ( 1) C | 2 - C            | 4  | /214. RY* ( 2) C | 6         | 0.35 1.71 0.031 |
| 5.            | BD ( 1) C | 2 - C            | 4  | /221. RY* ( 1) C | 7         | 0.35 1.94 0.033 |
| 5.            | BD ( 1) C | 2 - C            | 4  | /237. RY* ( 1) C | 9         | 0.36 1.94 0.034 |
| 5.            | BD ( 1) C | 2 - C            | 4  | /582. BD* ( 1) C | 1 - C 2   | 1.65 1.16 0.055 |
| 5.            | BD ( 1) C | 2 - C            | 4  | /585. BD* ( 1) C | 1 - O 20  | 1.34 1.01 0.047 |
| 5.            | BD ( 1) C | 2 - C            | 4  | /588. BD* ( 1) C | 2 - C 7   | 1.91 1.18 0.060 |
| 5.            | BD ( 1) C | 2 - C            | 4  | /591. BD* ( 1) C | 4 - C 6   | 1.99 1.19 0.062 |
| 5.            | BD ( 1) C | 2 - C            | 4  | /592. BD* ( 1) C | 4 - C 9   | 1.83 1.19 0.059 |
| 5.            | BD ( 1) C | 2 - C            | 4  | /596. BD* ( 1) C | 6 - N 11  | 1.39 1.11 0.050 |
| 5.            | BD ( 1) C | 2 - C            | 4  | /599. BD* ( 1) C | 7 - H 22  | 0.76 1.18 0.038 |
| 5.            | BD ( 1) C | 2 - C            | 4  | /604. BD* ( 1) C | 9 - H 24  | 0.69 1.19 0.036 |
| 6.            | BD ( 2) C | 2 - C            | 4  | /176. RY* ( 4) C | 1         | 0.30 0.84 0.022 |
| 6.            | BD ( 2) C | 2 - C            | 4  | /223. RY* ( 3) C | 7         | 0.55 0.77 0.028 |
| 6.            | BD ( 2) C | 2 - C            | 4  | /239. RY* ( 3) C | 9         | 0.50 0.86 0.028 |
| 6.            | BD ( 2) C | 2 - C            | 4  | /584. BD* ( 2) C | 1 - C 3   | 6.40 0.30 0.056 |
| 6.            | BD ( 2) C | 2 - C            | 4  | /594. BD* ( 2) C | 5 - C 6   | 6.35 0.31 0.057 |
| 6.            | BD ( 2) C | 2 - C            | 4  | /598. BD* ( 2) C | 7 - C 8   | 6.00 0.31 0.056 |
| 6.            | BD ( 2) C | 2 - C            | 4  | /603. BD* ( 2) C | 9 - C 10  | 5.79 0.31 0.056 |
| 7.            | BD ( 1) C | 2 - C            | 7  | /173. RY* ( 1) C | 1         | 0.29 1.72 0.028 |
| 7.            | BD ( 1) C | 2 - C            | 7  | /174. RY* ( 2) C | 1         | 0.36 2.06 0.035 |
| 7.            | BD ( 1) C | 2 - C            | 7  | /197. RY* ( 1) C | 4         | 0.41 2.17 0.038 |
| 7.            | BD ( 1) C | 2 - C            | 7  | /198. RY* ( 2) C | 4         | 0.28 2.18 0.031 |
| 7.            | BD ( 1) C | 2 - C            | 7  | /229. RY* ( 1) C | 8         | 0.36 1.83 0.033 |
| 7.            | BD ( 1) C | 2 - C            | 7  | /230. RY* ( 2) C | 8         | 0.78 1.94 0.049 |
| 7.            | BD ( 1) C | 2 - C            | 7  | /582. BD* ( 1) C | 1 - C 2   | 0.62 1.06 0.032 |
| 7.            | BD ( 1) C | 2 - C            | 7  | /583. BD* ( 1) C | 1 - C 3   | 0.71 1.27 0.038 |
| 7.            | BD ( 1) C | 2 - C            | 7  | /586. BD* ( 1) C | 2 - C 4   | 2.16 1.26 0.066 |
| 7.            | BD ( 1) C | 2 - C            | 7  | /591. BD* ( 1) C | 4 - C 6   | 2.35 1.10 0.064 |
| 7.            | BD ( 1) C | 2 - C            | 7  | /597. BD* ( 1) C | 7 - C 8   | 1.40 1.28 0.054 |
| 7.            | BD ( 1) C | 2 - C            | 7  | /599. BD* ( 1) C | 7 - H 22  | 0.31 1.08 0.023 |
| 7.            | BD ( 1) C | 2 - C            | 7  | /601. BD* ( 1) C | 8 - H 23  | 1.45 1.09 0.050 |

|     |    |   |    |   |   |   |   |    |       |     |   |    |   |    |      |      |       |      |      |       |
|-----|----|---|----|---|---|---|---|----|-------|-----|---|----|---|----|------|------|-------|------|------|-------|
| 8.  | BD | ( | 1) | C | 3 | - | C | 5  | /173. | RY* | ( | 1) | C | 1  | 0.63 | 1.72 | 0.042 |      |      |       |
| 8.  | BD | ( | 1) | C | 3 | - | C | 5  | /174. | RY* | ( | 2) | C | 1  | 0.38 | 2.06 | 0.036 |      |      |       |
| 8.  | BD | ( | 1) | C | 3 | - | C | 5  | /214. | RY* | ( | 2) | C | 6  | 0.29 | 1.62 | 0.028 |      |      |       |
| 8.  | BD | ( | 1) | C | 3 | - | C | 5  | /215. | RY* | ( | 3) | C | 6  | 0.72 | 1.77 | 0.045 |      |      |       |
| 8.  | BD | ( | 1) | C | 3 | - | C | 5  | /583. | BD* | ( | 1) | C | 1  | -    | C    | 3     | 1.29 | 1.27 | 0.051 |
| 8.  | BD | ( | 1) | C | 3 | - | C | 5  | /585. | BD* | ( | 1) | C | 1  | -    | O    | 20    | 2.53 | 0.92 | 0.061 |
| 8.  | BD | ( | 1) | C | 3 | - | C | 5  | /590. | BD* | ( | 1) | C | 3  | -    | H    | 21    | 0.37 | 1.08 | 0.025 |
| 8.  | BD | ( | 1) | C | 3 | - | C | 5  | /593. | BD* | ( | 1) | C | 5  | -    | C    | 6     | 1.50 | 1.29 | 0.056 |
| 8.  | BD | ( | 1) | C | 3 | - | C | 5  | /595. | BD* | ( | 1) | C | 5  | -    | H    | 31    | 0.30 | 1.08 | 0.023 |
| 8.  | BD | ( | 1) | C | 3 | - | C | 5  | /596. | BD* | ( | 1) | C | 6  | -    | N    | 11    | 3.00 | 1.02 | 0.070 |
| 9.  | BD | ( | 1) | C | 3 | - | H | 21 | /174. | RY* | ( | 2) | C | 1  | 0.46 | 1.93 | 0.038 |      |      |       |
| 9.  | BD | ( | 1) | C | 3 | - | H | 21 | /178. | RY* | ( | 6) | C | 1  | 0.27 | 8.78 | 0.062 |      |      |       |
| 9.  | BD | ( | 1) | C | 3 | - | H | 21 | /205. | RY* | ( | 1) | C | 5  | 0.50 | 1.82 | 0.038 |      |      |       |
| 9.  | BD | ( | 1) | C | 3 | - | H | 21 | /582. | BD* | ( | 1) | C | 1  | -    | C    | 2     | 3.06 | 0.93 | 0.068 |
| 9.  | BD | ( | 1) | C | 3 | - | H | 21 | /583. | BD* | ( | 1) | C | 1  | -    | C    | 3     | 0.71 | 1.13 | 0.036 |
| 9.  | BD | ( | 1) | C | 3 | - | H | 21 | /585. | BD* | ( | 1) | C | 1  | -    | O    | 20    | 0.84 | 0.79 | 0.032 |
| 9.  | BD | ( | 1) | C | 3 | - | H | 21 | /593. | BD* | ( | 1) | C | 5  | -    | C    | 6     | 1.41 | 1.15 | 0.051 |
| 10. | BD | ( | 1) | C | 4 | - | C | 6  | /181. | RY* | ( | 1) | C | 2  | 0.74 | 2.30 | 0.052 |      |      |       |
| 10. | BD | ( | 1) | C | 4 | - | C | 6  | /205. | RY* | ( | 1) | C | 5  | 0.46 | 1.95 | 0.038 |      |      |       |
| 10. | BD | ( | 1) | C | 4 | - | C | 6  | /237. | RY* | ( | 1) | C | 9  | 0.59 | 1.85 | 0.042 |      |      |       |
| 10. | BD | ( | 1) | C | 4 | - | C | 6  | /253. | RY* | ( | 1) | N | 11 | 0.32 | 1.74 | 0.030 |      |      |       |
| 10. | BD | ( | 1) | C | 4 | - | C | 6  | /586. | BD* | ( | 1) | C | 2  | -    | C    | 4     | 2.02 | 1.27 | 0.064 |
| 10. | BD | ( | 1) | C | 4 | - | C | 6  | /588. | BD* | ( | 1) | C | 2  | -    | C    | 7     | 2.02 | 1.08 | 0.059 |
| 10. | BD | ( | 1) | C | 4 | - | C | 6  | /592. | BD* | ( | 1) | C | 4  | -    | C    | 9     | 0.91 | 1.10 | 0.040 |
| 10. | BD | ( | 1) | C | 4 | - | C | 6  | /593. | BD* | ( | 1) | C | 5  | -    | C    | 6     | 2.05 | 1.29 | 0.065 |
| 10. | BD | ( | 1) | C | 4 | - | C | 6  | /595. | BD* | ( | 1) | C | 5  | -    | H    | 31    | 1.51 | 1.09 | 0.051 |
| 10. | BD | ( | 1) | C | 4 | - | C | 6  | /596. | BD* | ( | 1) | C | 6  | -    | N    | 11    | 0.43 | 1.02 | 0.027 |
| 10. | BD | ( | 1) | C | 4 | - | C | 6  | /602. | BD* | ( | 1) | C | 9  | -    | C    | 10    | 0.70 | 1.30 | 0.038 |
| 11. | BD | ( | 1) | C | 4 | - | C | 9  | /181. | RY* | ( | 1) | C | 2  | 0.34 | 2.29 | 0.036 |      |      |       |
| 11. | BD | ( | 1) | C | 4 | - | C | 9  | /182. | RY* | ( | 2) | C | 2  | 0.25 | 2.07 | 0.029 |      |      |       |
| 11. | BD | ( | 1) | C | 4 | - | C | 9  | /213. | RY* | ( | 1) | C | 6  | 0.76 | 1.78 | 0.047 |      |      |       |
| 11. | BD | ( | 1) | C | 4 | - | C | 9  | /214. | RY* | ( | 2) | C | 6  | 0.29 | 1.61 | 0.027 |      |      |       |
| 11. | BD | ( | 1) | C | 4 | - | C | 9  | /245. | RY* | ( | 1) | C | 10 | 0.32 | 1.90 | 0.031 |      |      |       |
| 11. | BD | ( | 1) | C | 4 | - | C | 9  | /246. | RY* | ( | 2) | C | 10 | 0.81 | 1.95 | 0.051 |      |      |       |
| 11. | BD | ( | 1) | C | 4 | - | C | 9  | /582. | BD* | ( | 1) | C | 1  | -    | C    | 2     | 2.31 | 1.06 | 0.063 |
| 11. | BD | ( | 1) | C | 4 | - | C | 9  | /586. | BD* | ( | 1) | C | 2  | -    | C    | 4     | 2.10 | 1.26 | 0.065 |
| 11. | BD | ( | 1) | C | 4 | - | C | 9  | /591. | BD* | ( | 1) | C | 4  | -    | C    | 6     | 0.95 | 1.09 | 0.041 |
| 11. | BD | ( | 1) | C | 4 | - | C | 9  | /593. | BD* | ( | 1) | C | 5  | -    | C    | 6     | 0.99 | 1.28 | 0.045 |
| 11. | BD | ( | 1) | C | 4 | - | C | 9  | /602. | BD* | ( | 1) | C | 9  | -    | C    | 10    | 1.43 | 1.29 | 0.054 |
| 11. | BD | ( | 1) | C | 4 | - | C | 9  | /604. | BD* | ( | 1) | C | 9  | -    | H    | 24    | 0.33 | 1.09 | 0.024 |
| 11. | BD | ( | 1) | C | 4 | - | C | 9  | /605. | BD* | ( | 1) | C | 10 | -    | H    | 25    | 1.52 | 1.08 | 0.051 |
| 12. | BD | ( | 1) | C | 5 | - | C | 6  | /190. | RY* | ( | 2) | C | 3  | 0.73 | 2.11 | 0.050 |      |      |       |
| 12. | BD | ( | 1) | C | 5 | - | C | 6  | /198. | RY* | ( | 2) | C | 4  | 0.73 | 2.29 | 0.052 |      |      |       |
| 12. | BD | ( | 1) | C | 5 | - | C | 6  | /253. | RY* | ( | 1) | N | 11 | 0.59 | 1.85 | 0.042 |      |      |       |
| 12. | BD | ( | 1) | C | 5 | - | C | 6  | /589. | BD* | ( | 1) | C | 3  | -    | C    | 5     | 1.37 | 1.22 | 0.052 |
| 12. | BD | ( | 1) | C | 5 | - | C | 6  | /590. | BD* | ( | 1) | C | 3  | -    | H    | 21    | 0.65 | 1.19 | 0.035 |
| 12. | BD | ( | 1) | C | 5 | - | C | 6  | /591. | BD* | ( | 1) | C | 4  | -    | C    | 6     | 2.11 | 1.21 | 0.064 |
| 12. | BD | ( | 1) | C | 5 | - | C | 6  | /592. | BD* | ( | 1) | C | 4  | -    | C    | 9     | 1.15 | 1.21 | 0.047 |
| 12. | BD | ( | 1) | C | 5 | - | C | 6  | /595. | BD* | ( | 1) | C | 5  | -    | H    | 31    | 0.96 | 1.19 | 0.043 |
| 12. | BD | ( | 1) | C | 5 | - | C | 6  | /596. | BD* | ( | 1) | C | 6  | -    | N    | 11    | 0.98 | 1.13 | 0.042 |
| 12. | BD | ( | 1) | C | 5 | - | C | 6  | /606. | BD* | ( | 1) | N | 11 | -    | N    | 12    | 0.62 | 1.25 | 0.035 |
| 13. | BD | ( | 2) | C | 5 | - | C | 6  | /191. | RY* | ( | 3) | C | 3  | 0.56 | 0.78 | 0.028 |      |      |       |
| 13. | BD | ( | 2) | C | 5 | - | C | 6  | /200. | RY* | ( | 4) | C | 4  | 0.34 | 0.95 | 0.024 |      |      |       |
| 13. | BD | ( | 2) | C | 5 | - | C | 6  | /584. | BD* | ( | 2) | C | 1  | -    | C    | 3     | 6.54 | 0.31 | 0.058 |
| 13. | BD | ( | 2) | C | 5 | - | C | 6  | /587. | BD* | ( | 2) | C | 2  | -    | C    | 4     | 6.25 | 0.32 | 0.059 |
| 13. | BD | ( | 2) | C | 5 | - | C | 6  | /606. | BD* | ( | 1) | N | 11 | -    | N    | 12    | 1.88 | 0.77 | 0.050 |
| 14. | BD | ( | 1) | C | 5 | - | H | 31 | /189. | RY* | ( | 1) | C | 3  | 0.49 | 1.83 | 0.038 |      |      |       |
| 14. | BD | ( | 1) | C | 5 | - | H | 31 | /213. | RY* | ( | 1) | C | 6  | 0.67 | 1.66 | 0.042 |      |      |       |
| 14. | BD | ( | 1) | C | 5 | - | H | 31 | /214. | RY* | ( | 2) | C | 6  | 0.28 | 1.49 | 0.026 |      |      |       |
| 14. | BD | ( | 1) | C | 5 | - | H | 31 | /583. | BD* | ( | 1) | C | 1  | -    | C    | 3     | 1.34 | 1.14 | 0.049 |
| 14. | BD | ( | 1) | C | 5 | - | H | 31 | /590. | BD* | ( | 1) | C | 3  | -    | H    | 21    | 0.25 | 0.95 | 0.020 |
| 14. | BD | ( | 1) | C | 5 | - | H | 31 | /591. | BD* | ( | 1) | C | 4  | -    | C    | 6     | 3.28 | 0.97 | 0.072 |
| 14. | BD | ( | 1) | C | 5 | - | H | 31 | /593. | BD* | ( | 1) | C | 5  | -    | C    | 6     | 0.87 | 1.16 | 0.040 |
| 14. | BD | ( | 1) | C | 5 | - | H | 31 | /596. | BD* | ( | 1) | C | 6  | -    | N    | 11    | 0.65 | 0.89 | 0.031 |
| 15. | BD | ( | 1) | C | 6 | - | N | 11 | /198. | RY* | ( | 2) | C | 4  | 0.61 | 2.33 | 0.048 |      |      |       |
| 15. | BD | ( | 1) | C | 6 | - | N | 11 | /205. | RY* | ( | 1) | C | 5  | 0.57 | 2.09 | 0.044 |      |      |       |
| 15. | BD | ( | 1) | C | 6 | - | N | 11 | /261. | RY* | ( | 1) | N | 12 | 0.74 | 1.61 | 0.044 |      |      |       |
| 15. | BD | ( | 1) | C | 6 | - | N | 11 | /262. | RY* | ( | 2) | N | 12 | 0.31 | 1.65 | 0.029 |      |      |       |
| 15. | BD | ( | 1) | C | 6 | - | N | 11 | /586. | BD* | ( | 1) | C | 2  | -    | C    | 4     | 0.73 | 1.41 | 0.040 |
| 15. | BD | ( | 1) | C | 6 | - | N | 11 | /589. | BD* | ( | 1) | C | 3  | -    | C    | 5     | 1.23 | 1.25 | 0.050 |
| 15. | BD | ( | 1) | C | 6 | - | N | 11 | /591. | BD* | ( | 1) | C | 4  | -    | C    | 6     | 0.63 | 1.24 | 0.035 |

|                         |                            |      |      |       |
|-------------------------|----------------------------|------|------|-------|
| 15. BD ( 1) C 6 - N 11  | /593. BD* ( 1) C 5 - C 6   | 1.15 | 1.43 | 0.051 |
| 15. BD ( 1) C 6 - N 11  | /606. BD* ( 1) N 11 - N 12 | 0.74 | 1.28 | 0.039 |
| 15. BD ( 1) C 6 - N 11  | /607. BD* ( 1) N 12 - C 13 | 2.74 | 1.16 | 0.071 |
| 16. BD ( 1) C 7 - C 8   | /181. RY* ( 1) C 2         | 0.59 | 2.40 | 0.048 |
| 16. BD ( 1) C 7 - C 8   | /182. RY* ( 2) C 2         | 0.36 | 2.18 | 0.036 |
| 16. BD ( 1) C 7 - C 8   | /245. RY* ( 1) C 10        | 0.46 | 2.01 | 0.039 |
| 16. BD ( 1) C 7 - C 8   | /246. RY* ( 2) C 10        | 0.41 | 2.06 | 0.037 |
| 16. BD ( 1) C 7 - C 8   | /582. BD* ( 1) C 1 - C 2   | 1.35 | 1.17 | 0.050 |
| 16. BD ( 1) C 7 - C 8   | /588. BD* ( 1) C 2 - C 7   | 1.49 | 1.19 | 0.053 |
| 16. BD ( 1) C 7 - C 8   | /599. BD* ( 1) C 7 - H 22  | 0.88 | 1.19 | 0.041 |
| 16. BD ( 1) C 7 - C 8   | /600. BD* ( 1) C 8 - C 10  | 1.21 | 1.21 | 0.048 |
| 16. BD ( 1) C 7 - C 8   | /601. BD* ( 1) C 8 - H 23  | 0.80 | 1.19 | 0.039 |
| 16. BD ( 1) C 7 - C 8   | /605. BD* ( 1) C 10 - H 25 | 0.78 | 1.19 | 0.039 |
| 17. BD ( 2) C 7 - C 8   | /184. RY* ( 4) C 2         | 0.35 | 0.89 | 0.024 |
| 17. BD ( 2) C 7 - C 8   | /247. RY* ( 3) C 10        | 0.46 | 0.82 | 0.026 |
| 17. BD ( 2) C 7 - C 8   | /587. BD* ( 2) C 2 - C 4   | 6.09 | 0.31 | 0.058 |
| 17. BD ( 2) C 7 - C 8   | /603. BD* ( 2) C 9 - C 10  | 6.43 | 0.32 | 0.057 |
| 18. BD ( 1) C 7 - H 22  | /181. RY* ( 1) C 2         | 0.72 | 2.18 | 0.050 |
| 18. BD ( 1) C 7 - H 22  | /229. RY* ( 1) C 8         | 0.69 | 1.72 | 0.044 |
| 18. BD ( 1) C 7 - H 22  | /586. BD* ( 1) C 2 - C 4   | 1.61 | 1.15 | 0.054 |
| 18. BD ( 1) C 7 - H 22  | /597. BD* ( 1) C 7 - C 8   | 0.75 | 1.17 | 0.037 |
| 18. BD ( 1) C 7 - H 22  | /600. BD* ( 1) C 8 - C 10  | 2.74 | 0.99 | 0.066 |
| 18. BD ( 1) C 7 - H 22  | /601. BD* ( 1) C 8 - H 23  | 0.48 | 0.97 | 0.027 |
| 19. BD ( 1) C 8 - C 10  | /222. RY* ( 2) C 7         | 0.92 | 1.76 | 0.051 |
| 19. BD ( 1) C 8 - C 10  | /238. RY* ( 2) C 9         | 0.96 | 1.70 | 0.051 |
| 19. BD ( 1) C 8 - C 10  | /597. BD* ( 1) C 7 - C 8   | 1.33 | 1.29 | 0.052 |
| 19. BD ( 1) C 8 - C 10  | /599. BD* ( 1) C 7 - H 22  | 1.58 | 1.08 | 0.052 |
| 19. BD ( 1) C 8 - C 10  | /601. BD* ( 1) C 8 - H 23  | 0.30 | 1.09 | 0.023 |
| 19. BD ( 1) C 8 - C 10  | /602. BD* ( 1) C 9 - C 10  | 1.37 | 1.30 | 0.053 |
| 19. BD ( 1) C 8 - C 10  | /604. BD* ( 1) C 9 - H 24  | 1.63 | 1.10 | 0.054 |
| 19. BD ( 1) C 8 - C 10  | /605. BD* ( 1) C 10 - H 25 | 0.29 | 1.09 | 0.022 |
| 20. BD ( 1) C 8 - H 23  | /221. RY* ( 1) C 7         | 0.76 | 1.72 | 0.046 |
| 20. BD ( 1) C 8 - H 23  | /245. RY* ( 1) C 10        | 0.66 | 1.77 | 0.043 |
| 20. BD ( 1) C 8 - H 23  | /588. BD* ( 1) C 2 - C 7   | 3.14 | 0.95 | 0.069 |
| 20. BD ( 1) C 8 - H 23  | /597. BD* ( 1) C 7 - C 8   | 0.71 | 1.16 | 0.036 |
| 20. BD ( 1) C 8 - H 23  | /599. BD* ( 1) C 7 - H 22  | 0.54 | 0.95 | 0.029 |
| 20. BD ( 1) C 8 - H 23  | /602. BD* ( 1) C 9 - C 10  | 1.40 | 1.17 | 0.051 |
| 21. BD ( 1) C 9 - C 10  | /197. RY* ( 1) C 4         | 0.75 | 2.27 | 0.052 |
| 21. BD ( 1) C 9 - C 10  | /198. RY* ( 2) C 4         | 0.30 | 2.29 | 0.033 |
| 21. BD ( 1) C 9 - C 10  | /229. RY* ( 1) C 8         | 0.42 | 1.94 | 0.036 |
| 21. BD ( 1) C 9 - C 10  | /230. RY* ( 2) C 8         | 0.43 | 2.04 | 0.038 |
| 21. BD ( 1) C 9 - C 10  | /591. BD* ( 1) C 4 - C 6   | 1.26 | 1.20 | 0.050 |
| 21. BD ( 1) C 9 - C 10  | /592. BD* ( 1) C 4 - C 9   | 1.47 | 1.20 | 0.053 |
| 21. BD ( 1) C 9 - C 10  | /600. BD* ( 1) C 8 - C 10  | 1.24 | 1.21 | 0.049 |
| 21. BD ( 1) C 9 - C 10  | /601. BD* ( 1) C 8 - H 23  | 0.78 | 1.19 | 0.038 |
| 21. BD ( 1) C 9 - C 10  | /604. BD* ( 1) C 9 - H 24  | 0.85 | 1.20 | 0.040 |
| 21. BD ( 1) C 9 - C 10  | /605. BD* ( 1) C 10 - H 25 | 0.83 | 1.19 | 0.040 |
| 22. BD ( 2) C 9 - C 10  | /200. RY* ( 4) C 4         | 0.26 | 0.94 | 0.021 |
| 22. BD ( 2) C 9 - C 10  | /231. RY* ( 3) C 8         | 0.48 | 0.78 | 0.026 |
| 22. BD ( 2) C 9 - C 10  | /587. BD* ( 2) C 2 - C 4   | 6.46 | 0.31 | 0.059 |
| 22. BD ( 2) C 9 - C 10  | /598. BD* ( 2) C 7 - C 8   | 7.04 | 0.31 | 0.059 |
| 23. BD ( 1) C 9 - H 24  | /197. RY* ( 1) C 4         | 0.71 | 2.04 | 0.048 |
| 23. BD ( 1) C 9 - H 24  | /245. RY* ( 1) C 10        | 0.65 | 1.77 | 0.043 |
| 23. BD ( 1) C 9 - H 24  | /586. BD* ( 1) C 2 - C 4   | 1.75 | 1.13 | 0.056 |
| 23. BD ( 1) C 9 - H 24  | /600. BD* ( 1) C 8 - C 10  | 2.73 | 0.98 | 0.065 |
| 23. BD ( 1) C 9 - H 24  | /602. BD* ( 1) C 9 - C 10  | 0.78 | 1.16 | 0.038 |
| 23. BD ( 1) C 9 - H 24  | /605. BD* ( 1) C 10 - H 25 | 0.49 | 0.96 | 0.027 |
| 24. BD ( 1) C 10 - H 25 | /229. RY* ( 1) C 8         | 0.52 | 1.70 | 0.038 |
| 24. BD ( 1) C 10 - H 25 | /237. RY* ( 1) C 9         | 0.64 | 1.71 | 0.042 |
| 24. BD ( 1) C 10 - H 25 | /592. BD* ( 1) C 4 - C 9   | 3.04 | 0.96 | 0.068 |
| 24. BD ( 1) C 10 - H 25 | /597. BD* ( 1) C 7 - C 8   | 1.36 | 1.16 | 0.050 |
| 24. BD ( 1) C 10 - H 25 | /602. BD* ( 1) C 9 - C 10  | 0.77 | 1.16 | 0.038 |
| 24. BD ( 1) C 10 - H 25 | /604. BD* ( 1) C 9 - H 24  | 0.50 | 0.96 | 0.028 |
| 25. BD ( 1) N 11 - N 12 | /213. RY* ( 1) C 6         | 0.58 | 2.12 | 0.044 |
| 25. BD ( 1) N 11 - N 12 | /269. RY* ( 1) C 13        | 0.56 | 2.09 | 0.043 |
| 25. BD ( 1) N 11 - N 12 | /270. RY* ( 2) C 13        | 0.98 | 2.41 | 0.062 |
| 25. BD ( 1) N 11 - N 12 | /593. BD* ( 1) C 5 - C 6   | 0.37 | 1.62 | 0.031 |
| 25. BD ( 1) N 11 - N 12 | /594. BD* ( 2) C 5 - C 6   | 0.41 | 1.02 | 0.028 |
| 25. BD ( 1) N 11 - N 12 | /596. BD* ( 1) C 6 - N 11  | 0.70 | 1.36 | 0.039 |
| 25. BD ( 1) N 11 - N 12 | /607. BD* ( 1) N 12 - C 13 | 0.27 | 1.36 | 0.024 |
| 25. BD ( 1) N 11 - N 12 | /608. BD* ( 1) C 13 - C 14 | 0.66 | 1.43 | 0.039 |

|                         |                            |      |      |       |
|-------------------------|----------------------------|------|------|-------|
| 26. BD ( 1) N 12 - C 13 | /213. RY* ( 1) C 6         | 0.31 | 1.93 | 0.031 |
| 26. BD ( 1) N 12 - C 13 | /254. RY* ( 2) N 11        | 0.73 | 2.53 | 0.054 |
| 26. BD ( 1) N 12 - C 13 | /255. RY* ( 3) N 11        | 0.51 | 2.02 | 0.041 |
| 26. BD ( 1) N 12 - C 13 | /277. RY* ( 1) C 14        | 0.43 | 2.06 | 0.038 |
| 26. BD ( 1) N 12 - C 13 | /285. RY* ( 1) C 15        | 0.49 | 1.91 | 0.039 |
| 26. BD ( 1) N 12 - C 13 | /596. BD* ( 1) C 6 - N 11  | 2.42 | 1.17 | 0.067 |
| 26. BD ( 1) N 12 - C 13 | /608. BD* ( 1) C 13 - C 14 | 0.42 | 1.23 | 0.029 |
| 26. BD ( 1) N 12 - C 13 | /609. BD* ( 1) C 13 - C 15 | 1.21 | 1.40 | 0.052 |
| 26. BD ( 1) N 12 - C 13 | /611. BD* ( 1) C 14 - C 16 | 0.44 | 1.43 | 0.032 |
| 26. BD ( 1) N 12 - C 13 | /614. BD* ( 1) C 15 - C 17 | 1.47 | 1.23 | 0.054 |
| 27. BD ( 1) C 13 - C 14 | /261. RY* ( 1) N 12        | 0.35 | 1.48 | 0.029 |
| 27. BD ( 1) C 13 - C 14 | /287. RY* ( 3) C 15        | 0.44 | 1.77 | 0.035 |
| 27. BD ( 1) C 13 - C 14 | /293. RY* ( 1) C 16        | 0.43 | 1.85 | 0.036 |
| 27. BD ( 1) C 13 - C 14 | /294. RY* ( 2) C 16        | 0.75 | 1.98 | 0.049 |
| 27. BD ( 1) C 13 - C 14 | /606. BD* ( 1) N 11 - N 12 | 1.49 | 1.15 | 0.052 |
| 27. BD ( 1) C 13 - C 14 | /607. BD* ( 1) N 12 - C 13 | 0.60 | 1.03 | 0.031 |
| 27. BD ( 1) C 13 - C 14 | /609. BD* ( 1) C 13 - C 15 | 2.20 | 1.27 | 0.067 |
| 27. BD ( 1) C 13 - C 14 | /611. BD* ( 1) C 14 - C 16 | 1.22 | 1.30 | 0.050 |
| 27. BD ( 1) C 13 - C 14 | /613. BD* ( 1) C 14 - H 26 | 0.30 | 1.09 | 0.023 |
| 27. BD ( 1) C 13 - C 14 | /615. BD* ( 1) C 15 - O 19 | 2.60 | 0.97 | 0.063 |
| 27. BD ( 1) C 13 - C 14 | /617. BD* ( 1) C 16 - H 27 | 1.47 | 1.10 | 0.051 |
| 28. BD ( 1) C 13 - C 15 | /263. RY* ( 3) N 12        | 0.29 | 1.84 | 0.029 |
| 28. BD ( 1) C 13 - C 15 | /277. RY* ( 1) C 14        | 0.52 | 2.05 | 0.041 |
| 28. BD ( 1) C 13 - C 15 | /301. RY* ( 1) C 17        | 0.68 | 2.07 | 0.048 |
| 28. BD ( 1) C 13 - C 15 | /607. BD* ( 1) N 12 - C 13 | 0.83 | 1.15 | 0.039 |
| 28. BD ( 1) C 13 - C 15 | /608. BD* ( 1) C 13 - C 14 | 2.16 | 1.22 | 0.065 |
| 28. BD ( 1) C 13 - C 15 | /613. BD* ( 1) C 14 - H 26 | 0.63 | 1.21 | 0.035 |
| 28. BD ( 1) C 13 - C 15 | /614. BD* ( 1) C 15 - C 17 | 1.89 | 1.22 | 0.061 |
| 28. BD ( 1) C 13 - C 15 | /615. BD* ( 1) C 15 - O 19 | 0.41 | 1.09 | 0.027 |
| 28. BD ( 1) C 13 - C 15 | /620. BD* ( 1) C 17 - H 28 | 0.65 | 1.22 | 0.035 |
| 29. BD ( 2) C 13 - C 15 | /262. RY* ( 2) N 12        | 0.29 | 1.16 | 0.025 |
| 29. BD ( 2) C 13 - C 15 | /279. RY* ( 3) C 14        | 0.49 | 0.84 | 0.027 |
| 29. BD ( 2) C 13 - C 15 | /303. RY* ( 3) C 17        | 0.60 | 0.87 | 0.031 |
| 29. BD ( 2) C 13 - C 15 | /612. BD* ( 2) C 14 - C 16 | 5.37 | 0.34 | 0.054 |
| 29. BD ( 2) C 13 - C 15 | /619. BD* ( 2) C 17 - C 18 | 7.33 | 0.33 | 0.063 |
| 30. BD ( 1) C 14 - C 16 | /270. RY* ( 2) C 13        | 0.91 | 2.18 | 0.056 |
| 30. BD ( 1) C 14 - C 16 | /309. RY* ( 1) C 18        | 0.50 | 1.94 | 0.039 |
| 30. BD ( 1) C 14 - C 16 | /310. RY* ( 2) C 18        | 0.42 | 2.06 | 0.037 |
| 30. BD ( 1) C 14 - C 16 | /607. BD* ( 1) N 12 - C 13 | 1.44 | 1.12 | 0.051 |
| 30. BD ( 1) C 14 - C 16 | /608. BD* ( 1) C 13 - C 14 | 1.18 | 1.19 | 0.047 |
| 30. BD ( 1) C 14 - C 16 | /613. BD* ( 1) C 14 - H 26 | 0.85 | 1.19 | 0.040 |
| 30. BD ( 1) C 14 - C 16 | /616. BD* ( 1) C 16 - C 18 | 1.16 | 1.21 | 0.047 |
| 30. BD ( 1) C 14 - C 16 | /617. BD* ( 1) C 16 - H 27 | 0.79 | 1.20 | 0.039 |
| 30. BD ( 1) C 14 - C 16 | /621. BD* ( 1) C 18 - H 29 | 0.79 | 1.20 | 0.039 |
| 31. BD ( 2) C 14 - C 16 | /272. RY* ( 4) C 13        | 0.26 | 0.93 | 0.020 |
| 31. BD ( 2) C 14 - C 16 | /311. RY* ( 3) C 18        | 0.46 | 0.79 | 0.025 |
| 31. BD ( 2) C 14 - C 16 | /610. BD* ( 2) C 13 - C 15 | 6.92 | 0.29 | 0.061 |
| 31. BD ( 2) C 14 - C 16 | /619. BD* ( 2) C 17 - C 18 | 5.76 | 0.31 | 0.054 |
| 32. BD ( 1) C 14 - H 26 | /269. RY* ( 1) C 13        | 0.40 | 1.63 | 0.032 |
| 32. BD ( 1) C 14 - H 26 | /293. RY* ( 1) C 16        | 0.65 | 1.71 | 0.042 |
| 32. BD ( 1) C 14 - H 26 | /607. BD* ( 1) N 12 - C 13 | 0.31 | 0.89 | 0.021 |
| 32. BD ( 1) C 14 - H 26 | /609. BD* ( 1) C 13 - C 15 | 1.64 | 1.13 | 0.055 |
| 32. BD ( 1) C 14 - H 26 | /611. BD* ( 1) C 14 - C 16 | 0.74 | 1.16 | 0.037 |
| 32. BD ( 1) C 14 - H 26 | /616. BD* ( 1) C 16 - C 18 | 2.75 | 0.98 | 0.066 |
| 32. BD ( 1) C 14 - H 26 | /617. BD* ( 1) C 16 - H 27 | 0.50 | 0.96 | 0.028 |
| 33. BD ( 1) C 15 - C 17 | /269. RY* ( 1) C 13        | 0.53 | 1.77 | 0.039 |
| 33. BD ( 1) C 15 - C 17 | /271. RY* ( 3) C 13        | 0.30 | 1.58 | 0.028 |
| 33. BD ( 1) C 15 - C 17 | /309. RY* ( 1) C 18        | 0.40 | 1.85 | 0.034 |
| 33. BD ( 1) C 15 - C 17 | /310. RY* ( 2) C 18        | 0.72 | 1.96 | 0.048 |
| 33. BD ( 1) C 15 - C 17 | /607. BD* ( 1) N 12 - C 13 | 2.53 | 1.03 | 0.064 |
| 33. BD ( 1) C 15 - C 17 | /609. BD* ( 1) C 13 - C 15 | 2.08 | 1.27 | 0.065 |
| 33. BD ( 1) C 15 - C 17 | /618. BD* ( 1) C 17 - C 18 | 1.32 | 1.30 | 0.053 |
| 33. BD ( 1) C 15 - C 17 | /620. BD* ( 1) C 17 - H 28 | 0.30 | 1.10 | 0.023 |
| 33. BD ( 1) C 15 - C 17 | /621. BD* ( 1) C 18 - H 29 | 1.50 | 1.10 | 0.052 |
| 34. BD ( 1) C 15 - O 19 | /269. RY* ( 1) C 13        | 0.29 | 1.97 | 0.030 |
| 34. BD ( 1) C 15 - O 19 | /285. RY* ( 1) C 15        | 0.57 | 1.98 | 0.042 |
| 34. BD ( 1) C 15 - O 19 | /608. BD* ( 1) C 13 - C 14 | 1.40 | 1.31 | 0.054 |
| 34. BD ( 1) C 15 - O 19 | /609. BD* ( 1) C 13 - C 15 | 0.76 | 1.48 | 0.043 |
| 34. BD ( 1) C 15 - O 19 | /614. BD* ( 1) C 15 - C 17 | 0.31 | 1.31 | 0.026 |
| 34. BD ( 1) C 15 - O 19 | /618. BD* ( 1) C 17 - C 18 | 0.49 | 1.51 | 0.034 |
| 35. BD ( 1) C 16 - C 18 | /278. RY* ( 2) C 14        | 0.97 | 1.83 | 0.053 |

|                         |                            |      |       |       |
|-------------------------|----------------------------|------|-------|-------|
| 35. BD ( 1) C 16 - C 18 | /302. RY* ( 2) C 17        | 0.96 | 1.83  | 0.053 |
| 35. BD ( 1) C 16 - C 18 | /611. BD* ( 1) C 14 - C 16 | 1.25 | 1.29  | 0.051 |
| 35. BD ( 1) C 16 - C 18 | /613. BD* ( 1) C 14 - H 26 | 1.63 | 1.08  | 0.053 |
| 35. BD ( 1) C 16 - C 18 | /617. BD* ( 1) C 16 - H 27 | 0.30 | 1.09  | 0.023 |
| 35. BD ( 1) C 16 - C 18 | /618. BD* ( 1) C 17 - C 18 | 1.24 | 1.29  | 0.051 |
| 35. BD ( 1) C 16 - C 18 | /620. BD* ( 1) C 17 - H 28 | 1.69 | 1.09  | 0.054 |
| 35. BD ( 1) C 16 - C 18 | /621. BD* ( 1) C 18 - H 29 | 0.29 | 1.09  | 0.023 |
| 36. BD ( 1) C 16 - H 27 | /277. RY* ( 1) C 14        | 0.78 | 1.78  | 0.047 |
| 36. BD ( 1) C 16 - H 27 | /309. RY* ( 1) C 18        | 0.59 | 1.70  | 0.040 |
| 36. BD ( 1) C 16 - H 27 | /608. BD* ( 1) C 13 - C 14 | 2.99 | 0.96  | 0.068 |
| 36. BD ( 1) C 16 - H 27 | /611. BD* ( 1) C 14 - C 16 | 0.71 | 1.16  | 0.036 |
| 36. BD ( 1) C 16 - H 27 | /613. BD* ( 1) C 14 - H 26 | 0.48 | 0.95  | 0.027 |
| 36. BD ( 1) C 16 - H 27 | /618. BD* ( 1) C 17 - C 18 | 1.36 | 1.16  | 0.050 |
| 37. BD ( 1) C 17 - C 18 | /285. RY* ( 1) C 15        | 0.49 | 1.87  | 0.038 |
| 37. BD ( 1) C 17 - C 18 | /286. RY* ( 2) C 15        | 0.52 | 2.17  | 0.043 |
| 37. BD ( 1) C 17 - C 18 | /293. RY* ( 1) C 16        | 0.52 | 1.94  | 0.040 |
| 37. BD ( 1) C 17 - C 18 | /294. RY* ( 2) C 16        | 0.43 | 2.08  | 0.038 |
| 37. BD ( 1) C 17 - C 18 | /614. BD* ( 1) C 15 - C 17 | 1.07 | 1.19  | 0.045 |
| 37. BD ( 1) C 17 - C 18 | /615. BD* ( 1) C 15 - O 19 | 1.37 | 1.07  | 0.048 |
| 37. BD ( 1) C 17 - C 18 | /616. BD* ( 1) C 16 - C 18 | 1.14 | 1.21  | 0.047 |
| 37. BD ( 1) C 17 - C 18 | /617. BD* ( 1) C 16 - H 27 | 0.80 | 1.20  | 0.039 |
| 37. BD ( 1) C 17 - C 18 | /620. BD* ( 1) C 17 - H 28 | 0.88 | 1.19  | 0.041 |
| 37. BD ( 1) C 17 - C 18 | /621. BD* ( 1) C 18 - H 29 | 0.78 | 1.20  | 0.039 |
| 38. BD ( 2) C 17 - C 18 | /288. RY* ( 4) C 15        | 0.27 | 0.94  | 0.021 |
| 38. BD ( 2) C 17 - C 18 | /295. RY* ( 3) C 16        | 0.52 | 0.79  | 0.027 |
| 38. BD ( 2) C 17 - C 18 | /610. BD* ( 2) C 13 - C 15 | 5.38 | 0.30  | 0.054 |
| 38. BD ( 2) C 17 - C 18 | /612. BD* ( 2) C 14 - C 16 | 7.34 | 0.31  | 0.061 |
| 39. BD ( 1) C 17 - H 28 | /285. RY* ( 1) C 15        | 0.40 | 1.64  | 0.033 |
| 39. BD ( 1) C 17 - H 28 | /309. RY* ( 1) C 18        | 0.63 | 1.71  | 0.042 |
| 39. BD ( 1) C 17 - H 28 | /609. BD* ( 1) C 13 - C 15 | 1.59 | 1.13  | 0.054 |
| 39. BD ( 1) C 17 - H 28 | /615. BD* ( 1) C 15 - O 19 | 0.43 | 0.83  | 0.024 |
| 39. BD ( 1) C 17 - H 28 | /616. BD* ( 1) C 16 - C 18 | 2.70 | 0.98  | 0.065 |
| 39. BD ( 1) C 17 - H 28 | /618. BD* ( 1) C 17 - C 18 | 0.75 | 1.16  | 0.037 |
| 39. BD ( 1) C 17 - H 28 | /621. BD* ( 1) C 18 - H 29 | 0.48 | 0.96  | 0.027 |
| 40. BD ( 1) C 18 - H 29 | /293. RY* ( 1) C 16        | 0.60 | 1.71  | 0.041 |
| 40. BD ( 1) C 18 - H 29 | /301. RY* ( 1) C 17        | 0.80 | 1.81  | 0.048 |
| 40. BD ( 1) C 18 - H 29 | /611. BD* ( 1) C 14 - C 16 | 1.37 | 1.16  | 0.050 |
| 40. BD ( 1) C 18 - H 29 | /614. BD* ( 1) C 15 - C 17 | 2.94 | 0.96  | 0.067 |
| 40. BD ( 1) C 18 - H 29 | /618. BD* ( 1) C 17 - C 18 | 0.67 | 1.16  | 0.035 |
| 40. BD ( 1) C 18 - H 29 | /620. BD* ( 1) C 17 - H 28 | 0.48 | 0.96  | 0.027 |
| 41. BD ( 1) O 20 - H 30 | /173. RY* ( 1) C 1         | 1.35 | 1.79  | 0.062 |
| 41. BD ( 1) O 20 - H 30 | /583. BD* ( 1) C 1 - C 3   | 1.72 | 1.34  | 0.061 |
| 85. CR ( 1) C 1         | /181. RY* ( 1) C 2         | 0.63 | 11.78 | 0.109 |
| 85. CR ( 1) C 1         | /190. RY* ( 2) C 3         | 1.15 | 11.48 | 0.145 |
| 85. CR ( 1) C 1         | /583. BD* ( 1) C 1 - C 3   | 1.02 | 10.75 | 0.133 |
| 85. CR ( 1) C 1         | /585. BD* ( 1) C 1 - O 20  | 0.66 | 10.40 | 0.105 |
| 85. CR ( 1) C 1         | /586. BD* ( 1) C 2 - C 4   | 0.31 | 10.75 | 0.074 |
| 85. CR ( 1) C 1         | /588. BD* ( 1) C 2 - C 7   | 0.34 | 10.57 | 0.077 |
| 85. CR ( 1) C 1         | /589. BD* ( 1) C 3 - C 5   | 0.49 | 10.60 | 0.092 |
| 86. CR ( 1) C 2         | /173. RY* ( 1) C 1         | 0.50 | 11.14 | 0.094 |
| 86. CR ( 1) C 2         | /197. RY* ( 1) C 4         | 0.33 | 11.59 | 0.078 |
| 86. CR ( 1) C 2         | /198. RY* ( 2) C 4         | 1.06 | 11.61 | 0.140 |
| 86. CR ( 1) C 2         | /222. RY* ( 2) C 7         | 0.51 | 11.18 | 0.096 |
| 86. CR ( 1) C 2         | /583. BD* ( 1) C 1 - C 3   | 0.30 | 10.69 | 0.072 |
| 86. CR ( 1) C 2         | /585. BD* ( 1) C 1 - O 20  | 0.26 | 10.34 | 0.066 |
| 86. CR ( 1) C 2         | /586. BD* ( 1) C 2 - C 4   | 0.67 | 10.69 | 0.107 |
| 86. CR ( 1) C 2         | /591. BD* ( 1) C 4 - C 6   | 0.58 | 10.52 | 0.100 |
| 86. CR ( 1) C 2         | /592. BD* ( 1) C 4 - C 9   | 0.53 | 10.52 | 0.095 |
| 86. CR ( 1) C 2         | /597. BD* ( 1) C 7 - C 8   | 0.28 | 10.71 | 0.069 |
| 87. CR ( 1) C 3         | /174. RY* ( 2) C 1         | 1.64 | 11.45 | 0.173 |
| 87. CR ( 1) C 3         | /334. RY* ( 2) H 21        | 0.30 | 12.29 | 0.076 |
| 87. CR ( 1) C 3         | /582. BD* ( 1) C 1 - C 2   | 0.68 | 10.46 | 0.107 |
| 87. CR ( 1) C 3         | /583. BD* ( 1) C 1 - C 3   | 0.33 | 10.66 | 0.075 |
| 87. CR ( 1) C 3         | /585. BD* ( 1) C 1 - O 20  | 0.40 | 10.31 | 0.082 |
| 87. CR ( 1) C 3         | /593. BD* ( 1) C 5 - C 6   | 0.35 | 10.68 | 0.077 |
| 88. CR ( 1) C 4         | /182. RY* ( 2) C 2         | 1.13 | 11.49 | 0.144 |
| 88. CR ( 1) C 4         | /215. RY* ( 3) C 6         | 0.68 | 11.18 | 0.110 |
| 88. CR ( 1) C 4         | /238. RY* ( 2) C 9         | 0.57 | 11.11 | 0.101 |
| 88. CR ( 1) C 4         | /582. BD* ( 1) C 1 - C 2   | 0.56 | 10.48 | 0.098 |
| 88. CR ( 1) C 4         | /586. BD* ( 1) C 2 - C 4   | 0.57 | 10.68 | 0.099 |
| 88. CR ( 1) C 4         | /588. BD* ( 1) C 2 - C 7   | 0.52 | 10.50 | 0.094 |



|     |    |   |    |   |    |       |     |   |    |   |    |   |   |    |      |       |       |
|-----|----|---|----|---|----|-------|-----|---|----|---|----|---|---|----|------|-------|-------|
| 88. | CR | ( | 1) | C | 4  | /593. | BD* | ( | 1) | C | 5  | - | C | 6  | 0.35 | 10.70 | 0.078 |
| 88. | CR | ( | 1) | C | 4  | /596. | BD* | ( | 1) | C | 6  | - | N | 11 | 0.28 | 10.44 | 0.069 |
| 88. | CR | ( | 1) | C | 4  | /602. | BD* | ( | 1) | C | 9  | - | C | 10 | 0.29 | 10.71 | 0.070 |
| 89. | CR | ( | 1) | C | 5  | /213. | RY* | ( | 1) | C | 6  |   |   |    | 0.33 | 11.18 | 0.076 |
| 89. | CR | ( | 1) | C | 5  | /214. | RY* | ( | 2) | C | 6  |   |   |    | 1.21 | 11.02 | 0.146 |
| 89. | CR | ( | 1) | C | 5  | /216. | RY* | ( | 4) | C | 6  |   |   |    | 0.43 | 11.03 | 0.086 |
| 89. | CR | ( | 1) | C | 5  | /354. | RY* | ( | 2) | H | 31 |   |   |    | 0.26 | 12.32 | 0.071 |
| 89. | CR | ( | 1) | C | 5  | /583. | BD* | ( | 1) | C | 1  | - | C | 3  | 0.33 | 10.66 | 0.075 |
| 89. | CR | ( | 1) | C | 5  | /591. | BD* | ( | 1) | C | 4  | - | C | 6  | 0.68 | 10.50 | 0.108 |
| 89. | CR | ( | 1) | C | 5  | /593. | BD* | ( | 1) | C | 5  | - | C | 6  | 0.48 | 10.68 | 0.091 |
| 89. | CR | ( | 1) | C | 5  | /596. | BD* | ( | 1) | C | 6  | - | N | 11 | 0.49 | 10.42 | 0.091 |
| 90. | CR | ( | 1) | C | 6  | /197. | RY* | ( | 1) | C | 4  |   |   |    | 0.66 | 11.61 | 0.111 |
| 90. | CR | ( | 1) | C | 6  | /206. | RY* | ( | 2) | C | 5  |   |   |    | 1.18 | 11.30 | 0.146 |
| 90. | CR | ( | 1) | C | 6  | /586. | BD* | ( | 1) | C | 2  | - | C | 4  | 0.37 | 10.71 | 0.080 |
| 90. | CR | ( | 1) | C | 6  | /589. | BD* | ( | 1) | C | 3  | - | C | 5  | 0.49 | 10.55 | 0.091 |
| 90. | CR | ( | 1) | C | 6  | /592. | BD* | ( | 1) | C | 4  | - | C | 9  | 0.34 | 10.54 | 0.076 |
| 90. | CR | ( | 1) | C | 6  | /593. | BD* | ( | 1) | C | 5  | - | C | 6  | 0.75 | 10.73 | 0.114 |
| 90. | CR | ( | 1) | C | 6  | /595. | BD* | ( | 1) | C | 5  | - | H | 31 | 0.25 | 10.52 | 0.066 |
| 90. | CR | ( | 1) | C | 6  | /606. | BD* | ( | 1) | N | 11 | - | N | 12 | 0.39 | 10.58 | 0.082 |
| 91. | CR | ( | 1) | C | 7  | /182. | RY* | ( | 2) | C | 2  |   |   |    | 0.35 | 11.48 | 0.081 |
| 91. | CR | ( | 1) | C | 7  | /230. | RY* | ( | 2) | C | 8  |   |   |    | 1.15 | 11.34 | 0.144 |
| 91. | CR | ( | 1) | C | 7  | /336. | RY* | ( | 2) | H | 22 |   |   |    | 0.27 | 12.26 | 0.073 |
| 91. | CR | ( | 1) | C | 7  | /582. | BD* | ( | 1) | C | 1  | - | C | 2  | 0.35 | 10.47 | 0.077 |
| 91. | CR | ( | 1) | C | 7  | /586. | BD* | ( | 1) | C | 2  | - | C | 4  | 0.37 | 10.67 | 0.080 |
| 91. | CR | ( | 1) | C | 7  | /597. | BD* | ( | 1) | C | 7  | - | C | 8  | 0.43 | 10.69 | 0.086 |
| 91. | CR | ( | 1) | C | 7  | /600. | BD* | ( | 1) | C | 8  | - | C | 10 | 0.53 | 10.51 | 0.095 |
| 92. | CR | ( | 1) | C | 8  | /221. | RY* | ( | 1) | C | 7  |   |   |    | 0.37 | 11.24 | 0.082 |
| 92. | CR | ( | 1) | C | 8  | /222. | RY* | ( | 2) | C | 7  |   |   |    | 0.63 | 11.15 | 0.106 |
| 92. | CR | ( | 1) | C | 8  | /224. | RY* | ( | 4) | C | 7  |   |   |    | 0.40 | 11.08 | 0.085 |
| 92. | CR | ( | 1) | C | 8  | /246. | RY* | ( | 2) | C | 10 |   |   |    | 0.44 | 11.35 | 0.089 |
| 92. | CR | ( | 1) | C | 8  | /338. | RY* | ( | 2) | H | 23 |   |   |    | 0.31 | 11.93 | 0.076 |
| 92. | CR | ( | 1) | C | 8  | /588. | BD* | ( | 1) | C | 2  | - | C | 7  | 0.62 | 10.48 | 0.102 |
| 92. | CR | ( | 1) | C | 8  | /597. | BD* | ( | 1) | C | 7  | - | C | 8  | 0.38 | 10.68 | 0.081 |
| 92. | CR | ( | 1) | C | 8  | /602. | BD* | ( | 1) | C | 9  | - | C | 10 | 0.32 | 10.69 | 0.074 |
| 93. | CR | ( | 1) | C | 9  | /198. | RY* | ( | 2) | C | 4  |   |   |    | 0.50 | 11.58 | 0.096 |
| 93. | CR | ( | 1) | C | 9  | /246. | RY* | ( | 2) | C | 10 |   |   |    | 1.09 | 11.35 | 0.141 |
| 93. | CR | ( | 1) | C | 9  | /340. | RY* | ( | 2) | H | 24 |   |   |    | 0.26 | 12.40 | 0.071 |
| 93. | CR | ( | 1) | C | 9  | /586. | BD* | ( | 1) | C | 2  | - | C | 4  | 0.42 | 10.66 | 0.085 |
| 93. | CR | ( | 1) | C | 9  | /591. | BD* | ( | 1) | C | 4  | - | C | 6  | 0.34 | 10.49 | 0.077 |
| 93. | CR | ( | 1) | C | 9  | /600. | BD* | ( | 1) | C | 8  | - | C | 10 | 0.54 | 10.50 | 0.095 |
| 93. | CR | ( | 1) | C | 9  | /602. | BD* | ( | 1) | C | 9  | - | C | 10 | 0.43 | 10.69 | 0.086 |
| 94. | CR | ( | 1) | C | 10 | /230. | RY* | ( | 2) | C | 8  |   |   |    | 0.42 | 11.33 | 0.087 |
| 94. | CR | ( | 1) | C | 10 | /237. | RY* | ( | 1) | C | 9  |   |   |    | 0.39 | 11.24 | 0.084 |
| 94. | CR | ( | 1) | C | 10 | /238. | RY* | ( | 2) | C | 9  |   |   |    | 0.51 | 11.09 | 0.095 |
| 94. | CR | ( | 1) | C | 10 | /240. | RY* | ( | 4) | C | 9  |   |   |    | 0.57 | 11.20 | 0.101 |
| 94. | CR | ( | 1) | C | 10 | /342. | RY* | ( | 2) | H | 25 |   |   |    | 0.34 | 12.31 | 0.082 |
| 94. | CR | ( | 1) | C | 10 | /592. | BD* | ( | 1) | C | 4  | - | C | 9  | 0.61 | 10.49 | 0.101 |
| 94. | CR | ( | 1) | C | 10 | /597. | BD* | ( | 1) | C | 7  | - | C | 8  | 0.32 | 10.68 | 0.074 |
| 94. | CR | ( | 1) | C | 10 | /602. | BD* | ( | 1) | C | 9  | - | C | 10 | 0.41 | 10.69 | 0.084 |
| 95. | CR | ( | 1) | N | 11 | /213. | RY* | ( | 1) | C | 6  |   |   |    | 0.89 | 15.34 | 0.148 |
| 95. | CR | ( | 1) | N | 11 | /263. | RY* | ( | 3) | N | 12 |   |   |    | 0.85 | 15.27 | 0.144 |
| 95. | CR | ( | 1) | N | 11 | /591. | BD* | ( | 1) | C | 4  | - | C | 6  | 0.28 | 14.66 | 0.082 |
| 95. | CR | ( | 1) | N | 11 | /593. | BD* | ( | 1) | C | 5  | - | C | 6  | 0.28 | 14.84 | 0.082 |
| 95. | CR | ( | 1) | N | 11 | /607. | BD* | ( | 1) | N | 12 | - | C | 13 | 0.68 | 14.58 | 0.127 |
| 96. | CR | ( | 1) | N | 12 | /255. | RY* | ( | 3) | N | 11 |   |   |    | 0.99 | 15.44 | 0.156 |
| 96. | CR | ( | 1) | N | 12 | /269. | RY* | ( | 1) | C | 13 |   |   |    | 0.78 | 15.32 | 0.138 |
| 96. | CR | ( | 1) | N | 12 | /270. | RY* | ( | 2) | C | 13 |   |   |    | 0.30 | 15.64 | 0.086 |
| 96. | CR | ( | 1) | N | 12 | /596. | BD* | ( | 1) | C | 6  | - | N | 11 | 0.63 | 14.59 | 0.122 |
| 96. | CR | ( | 1) | N | 12 | /609. | BD* | ( | 1) | C | 13 | - | C | 15 | 0.36 | 14.83 | 0.093 |
| 97. | CR | ( | 1) | C | 13 | /278. | RY* | ( | 2) | C | 14 |   |   |    | 0.51 | 11.28 | 0.096 |
| 97. | CR | ( | 1) | C | 13 | /285. | RY* | ( | 1) | C | 15 |   |   |    | 0.51 | 11.21 | 0.096 |
| 97. | CR | ( | 1) | C | 13 | /286. | RY* | ( | 2) | C | 15 |   |   |    | 1.17 | 11.51 | 0.146 |
| 97. | CR | ( | 1) | C | 13 | /606. | BD* | ( | 1) | N | 11 | - | N | 12 | 0.46 | 10.59 | 0.088 |
| 97. | CR | ( | 1) | C | 13 | /609. | BD* | ( | 1) | C | 13 | - | C | 15 | 0.74 | 10.71 | 0.113 |
| 97. | CR | ( | 1) | C | 13 | /611. | BD* | ( | 1) | C | 14 | - | C | 16 | 0.28 | 10.73 | 0.070 |
| 97. | CR | ( | 1) | C | 13 | /614. | BD* | ( | 1) | C | 15 | - | C | 17 | 0.56 | 10.53 | 0.098 |
| 97. | CR | ( | 1) | C | 13 | /615. | BD* | ( | 1) | C | 15 | - | O | 19 | 0.40 | 10.41 | 0.082 |
| 98. | CR | ( | 1) | C | 14 | /269. | RY* | ( | 1) | C | 13 |   |   |    | 0.29 | 11.16 | 0.072 |
| 98. | CR | ( | 1) | C | 14 | /271. | RY* | ( | 3) | C | 13 |   |   |    | 0.40 | 10.97 | 0.084 |
| 98. | CR | ( | 1) | C | 14 | /294. | RY* | ( | 2) | C | 16 |   |   |    | 1.07 | 11.37 | 0.139 |
| 98. | CR | ( | 1) | C | 14 | /344. | RY* | ( | 2) | H | 26 |   |   |    | 0.31 | 12.30 | 0.078 |

|                   |                            |       |       |       |
|-------------------|----------------------------|-------|-------|-------|
| 98. CR ( 1) C 14  | /607. BD* ( 1) N 12 - C 13 | 0.29  | 10.42 | 0.070 |
| 98. CR ( 1) C 14  | /609. BD* ( 1) C 13 - C 15 | 0.41  | 10.66 | 0.084 |
| 98. CR ( 1) C 14  | /611. BD* ( 1) C 14 - C 16 | 0.44  | 10.69 | 0.087 |
| 98. CR ( 1) C 14  | /616. BD* ( 1) C 16 - C 18 | 0.52  | 10.51 | 0.094 |
| 99. CR ( 1) C 15  | /270. RY* ( 2) C 13        | 1.56  | 11.54 | 0.169 |
| 99. CR ( 1) C 15  | /302. RY* ( 2) C 17        | 0.53  | 11.30 | 0.097 |
| 99. CR ( 1) C 15  | /607. BD* ( 1) N 12 - C 13 | 0.43  | 10.49 | 0.086 |
| 99. CR ( 1) C 15  | /608. BD* ( 1) C 13 - C 14 | 0.56  | 10.56 | 0.097 |
| 99. CR ( 1) C 15  | /609. BD* ( 1) C 13 - C 15 | 0.90  | 10.73 | 0.125 |
| 99. CR ( 1) C 15  | /615. BD* ( 1) C 15 - O 19 | 0.42  | 10.43 | 0.085 |
| 99. CR ( 1) C 15  | /618. BD* ( 1) C 17 - C 18 | 0.30  | 10.76 | 0.072 |
| 100. CR ( 1) C 16 | /277. RY* ( 1) C 14        | 0.43  | 11.31 | 0.088 |
| 100. CR ( 1) C 16 | /278. RY* ( 2) C 14        | 0.75  | 11.23 | 0.116 |
| 100. CR ( 1) C 16 | /310. RY* ( 2) C 18        | 0.45  | 11.35 | 0.091 |
| 100. CR ( 1) C 16 | /346. RY* ( 2) H 27        | 0.33  | 12.02 | 0.080 |
| 100. CR ( 1) C 16 | /608. BD* ( 1) C 13 - C 14 | 0.56  | 10.48 | 0.098 |
| 100. CR ( 1) C 16 | /611. BD* ( 1) C 14 - C 16 | 0.37  | 10.68 | 0.080 |
| 100. CR ( 1) C 16 | /618. BD* ( 1) C 17 - C 18 | 0.30  | 10.68 | 0.072 |
| 101. CR ( 1) C 17 | /286. RY* ( 2) C 15        | 0.26  | 11.46 | 0.069 |
| 101. CR ( 1) C 17 | /287. RY* ( 3) C 15        | 0.65  | 11.15 | 0.107 |
| 101. CR ( 1) C 17 | /310. RY* ( 2) C 18        | 1.06  | 11.35 | 0.139 |
| 101. CR ( 1) C 17 | /348. RY* ( 2) H 28        | 0.30  | 12.34 | 0.077 |
| 101. CR ( 1) C 17 | /609. BD* ( 1) C 13 - C 15 | 0.45  | 10.66 | 0.088 |
| 101. CR ( 1) C 17 | /616. BD* ( 1) C 16 - C 18 | 0.52  | 10.50 | 0.094 |
| 101. CR ( 1) C 17 | /618. BD* ( 1) C 17 - C 18 | 0.42  | 10.69 | 0.085 |
| 102. CR ( 1) C 18 | /294. RY* ( 2) C 16        | 0.46  | 11.37 | 0.092 |
| 102. CR ( 1) C 18 | /301. RY* ( 1) C 17        | 0.44  | 11.34 | 0.090 |
| 102. CR ( 1) C 18 | /302. RY* ( 2) C 17        | 0.82  | 11.22 | 0.121 |
| 102. CR ( 1) C 18 | /350. RY* ( 2) H 29        | 0.31  | 11.98 | 0.078 |
| 102. CR ( 1) C 18 | /611. BD* ( 1) C 14 - C 16 | 0.30  | 10.68 | 0.072 |
| 102. CR ( 1) C 18 | /614. BD* ( 1) C 15 - C 17 | 0.53  | 10.48 | 0.095 |
| 102. CR ( 1) C 18 | /618. BD* ( 1) C 17 - C 18 | 0.38  | 10.69 | 0.081 |
| 103. CR ( 1) O 19 | /285. RY* ( 1) C 15        | 1.45  | 20.03 | 0.216 |
| 103. CR ( 1) O 19 | /609. BD* ( 1) C 13 - C 15 | 0.30  | 19.53 | 0.098 |
| 104. CR ( 1) O 20 | /173. RY* ( 1) C 1         | 1.16  | 20.03 | 0.193 |
| 104. CR ( 1) O 20 | /582. BD* ( 1) C 1 - C 2   | 0.28  | 19.38 | 0.094 |
| 140. LP ( 1) N 11 | /214. RY* ( 2) C 6         | 0.27  | 1.28  | 0.024 |
| 140. LP ( 1) N 11 | /261. RY* ( 1) N 12        | 0.63  | 1.13  | 0.034 |
| 140. LP ( 1) N 11 | /262. RY* ( 2) N 12        | 1.02  | 1.16  | 0.044 |
| 140. LP ( 1) N 11 | /589. BD* ( 1) C 3 - C 5   | 0.25  | 0.77  | 0.018 |
| 140. LP ( 1) N 11 | /591. BD* ( 1) C 4 - C 6   | 4.40  | 0.76  | 0.074 |
| 140. LP ( 1) N 11 | /593. BD* ( 1) C 5 - C 6   | 2.54  | 0.94  | 0.063 |
| 140. LP ( 1) N 11 | /594. BD* ( 2) C 5 - C 6   | 0.62  | 0.34  | 0.019 |
| 141. LP ( 2) N 11 | /213. RY* ( 1) C 6         | 0.82  | 1.62  | 0.047 |
| 141. LP ( 2) N 11 | /253. RY* ( 1) N 11        | 0.88  | 1.58  | 0.048 |
| 141. LP ( 2) N 11 | /254. RY* ( 2) N 11        | 1.67  | 2.22  | 0.079 |
| 141. LP ( 2) N 11 | /255. RY* ( 3) N 11        | 0.68  | 1.71  | 0.044 |
| 141. LP ( 2) N 11 | /261. RY* ( 1) N 12        | 0.37  | 1.31  | 0.028 |
| 141. LP ( 2) N 11 | /317. RY* ( 1) O 19        | 0.45  | 2.65  | 0.045 |
| 141. LP ( 2) N 11 | /591. BD* ( 1) C 4 - C 6   | 0.55  | 0.94  | 0.029 |
| 141. LP ( 2) N 11 | /594. BD* ( 2) C 5 - C 6   | 3.49  | 0.53  | 0.056 |
| 142. LP ( 1) N 12 | /254. RY* ( 2) N 11        | 0.35  | 2.15  | 0.035 |
| 142. LP ( 1) N 12 | /255. RY* ( 3) N 11        | 0.45  | 1.63  | 0.035 |
| 142. LP ( 1) N 12 | /269. RY* ( 1) C 13        | 0.96  | 1.52  | 0.049 |
| 142. LP ( 1) N 12 | /608. BD* ( 1) C 13 - C 14 | 0.57  | 0.85  | 0.028 |
| 142. LP ( 1) N 12 | /609. BD* ( 1) C 13 - C 15 | 3.64  | 1.02  | 0.077 |
| 143. LP ( 2) N 12 | /253. RY* ( 1) N 11        | 1.08  | 1.38  | 0.051 |
| 143. LP ( 2) N 12 | /272. RY* ( 4) C 13        | 0.35  | 0.94  | 0.024 |
| 143. LP ( 2) N 12 | /610. BD* ( 2) C 13 - C 15 | 16.65 | 0.30  | 0.095 |
| 144. LP ( 1) O 19 | /285. RY* ( 1) C 15        | 1.04  | 1.67  | 0.053 |
| 144. LP ( 1) O 19 | /609. BD* ( 1) C 13 - C 15 | 3.39  | 1.17  | 0.080 |
| 145. LP ( 2) O 19 | /254. RY* ( 2) N 11        | 0.37  | 2.24  | 0.037 |
| 145. LP ( 2) O 19 | /285. RY* ( 1) C 15        | 0.69  | 1.62  | 0.043 |
| 145. LP ( 2) O 19 | /317. RY* ( 1) O 19        | 0.54  | 2.67  | 0.049 |
| 145. LP ( 2) O 19 | /609. BD* ( 1) C 13 - C 15 | 0.35  | 1.12  | 0.025 |
| 145. LP ( 2) O 19 | /610. BD* ( 2) C 13 - C 15 | 0.45  | 0.53  | 0.021 |
| 145. LP ( 2) O 19 | /614. BD* ( 1) C 15 - C 17 | 3.58  | 0.95  | 0.074 |
| 146. LP ( 3) O 19 | /288. RY* ( 4) C 15        | 0.34  | 1.01  | 0.024 |
| 146. LP ( 3) O 19 | /317. RY* ( 1) O 19        | 0.25  | 2.52  | 0.033 |
| 146. LP ( 3) O 19 | /610. BD* ( 2) C 13 - C 15 | 10.31 | 0.37  | 0.085 |
| 146. LP ( 3) O 19 | /614. BD* ( 1) C 15 - C 17 | 0.33  | 0.79  | 0.021 |

|                           |                            |       |      |       |
|---------------------------|----------------------------|-------|------|-------|
| 147. LP ( 1) O 20         | /173. RY* ( 1) C 1         | 1.45  | 1.66 | 0.062 |
| 147. LP ( 1) O 20         | /582. BD* ( 1) C 1 - C 2   | 3.52  | 1.01 | 0.076 |
| 148. LP ( 2) O 20         | /584. BD* ( 2) C 1 - C 3   | 12.04 | 0.35 | 0.086 |
| 584. BD* ( 2) C 1 - C 3   | /176. RY* ( 4) C 1         | 0.51  | 0.54 | 0.058 |
| 584. BD* ( 2) C 1 - C 3   | /191. RY* ( 3) C 3         | 1.15  | 0.48 | 0.081 |
| 587. BD* ( 2) C 2 - C 4   | /184. RY* ( 4) C 2         | 1.11  | 0.57 | 0.075 |
| 587. BD* ( 2) C 2 - C 4   | /200. RY* ( 4) C 4         | 0.87  | 0.63 | 0.070 |
| 594. BD* ( 2) C 5 - C 6   | /207. RY* ( 3) C 5         | 0.50  | 0.68 | 0.066 |
| 594. BD* ( 2) C 5 - C 6   | /606. BD* ( 1) N 11 - N 12 | 0.51  | 0.45 | 0.053 |
| 598. BD* ( 2) C 7 - C 8   | /223. RY* ( 3) C 7         | 0.69  | 0.46 | 0.073 |
| 598. BD* ( 2) C 7 - C 8   | /231. RY* ( 3) C 8         | 0.74  | 0.48 | 0.077 |
| 603. BD* ( 2) C 9 - C 10  | /239. RY* ( 3) C 9         | 0.62  | 0.55 | 0.077 |
| 603. BD* ( 2) C 9 - C 10  | /247. RY* ( 3) C 10        | 0.65  | 0.51 | 0.076 |
| 610. BD* ( 2) C 13 - C 15 | /272. RY* ( 4) C 13        | 1.03  | 0.64 | 0.070 |
| 610. BD* ( 2) C 13 - C 15 | /288. RY* ( 4) C 15        | 0.77  | 0.64 | 0.061 |
| 610. BD* ( 2) C 13 - C 15 | /612. BD* ( 2) C 14 - C 16 | 62.76 | 0.02 | 0.071 |
| 610. BD* ( 2) C 13 - C 15 | /619. BD* ( 2) C 17 - C 18 | 82.91 | 0.01 | 0.071 |
| 612. BD* ( 2) C 14 - C 16 | /279. RY* ( 3) C 14        | 0.75  | 0.50 | 0.072 |
| 612. BD* ( 2) C 14 - C 16 | /295. RY* ( 3) C 16        | 0.90  | 0.48 | 0.077 |
| 619. BD* ( 2) C 17 - C 18 | /303. RY* ( 3) C 17        | 0.96  | 0.54 | 0.078 |
| 619. BD* ( 2) C 17 - C 18 | /311. RY* ( 3) C 18        | 0.95  | 0.48 | 0.073 |

from unit 1 to unit 2

|                         |                            |      |      |       |
|-------------------------|----------------------------|------|------|-------|
| 5. BD ( 1) C 2 - C 4    | /521. RY* ( 1) H 58        | 0.04 | 1.18 | 0.009 |
| 6. BD ( 2) C 2 - C 4    | /661. BD* ( 1) C 48 - H 58 | 0.03 | 0.71 | 0.006 |
| 10. BD ( 1) C 4 - C 6   | /467. RY* ( 1) C 46        | 0.05 | 1.80 | 0.011 |
| 10. BD ( 1) C 4 - C 6   | /542. RY* ( 2) O 65        | 0.04 | 1.79 | 0.011 |
| 11. BD ( 1) C 4 - C 9   | /483. RY* ( 1) C 48        | 0.06 | 1.92 | 0.013 |
| 11. BD ( 1) C 4 - C 9   | /485. RY* ( 3) C 48        | 0.04 | 1.41 | 0.009 |
| 12. BD ( 1) C 5 - C 6   | /542. RY* ( 2) O 65        | 0.03 | 1.90 | 0.009 |
| 13. BD ( 2) C 5 - C 6   | /542. RY* ( 2) O 65        | 0.03 | 1.42 | 0.009 |
| 13. BD ( 2) C 5 - C 6   | /656. BD* ( 1) C 46 - O 65 | 0.04 | 0.57 | 0.007 |
| 15. BD ( 1) C 6 - N 11  | /467. RY* ( 1) C 46        | 0.04 | 1.94 | 0.012 |
| 15. BD ( 1) C 6 - N 11  | /542. RY* ( 2) O 65        | 0.04 | 1.93 | 0.012 |
| 21. BD ( 1) C 9 - C 10  | /483. RY* ( 1) C 48        | 0.05 | 2.02 | 0.013 |
| 21. BD ( 1) C 9 - C 10  | /485. RY* ( 3) C 48        | 0.09 | 1.52 | 0.015 |
| 22. BD ( 2) C 9 - C 10  | /660. BD* ( 2) C 48 - C 49 | 0.17 | 0.30 | 0.009 |
| 33. BD ( 1) C 15 - C 17 | /527. RY* ( 1) H 61        | 0.12 | 1.34 | 0.016 |
| 34. BD ( 1) C 15 - O 19 | /435. RY* ( 1) N 42        | 0.16 | 2.11 | 0.023 |
| 34. BD ( 1) C 15 - O 19 | /436. RY* ( 2) N 42        | 0.05 | 2.42 | 0.014 |
| 34. BD ( 1) C 15 - O 19 | /451. RY* ( 1) C 44        | 0.07 | 1.99 | 0.015 |
| 38. BD ( 2) C 17 - C 18 | /636. BD* ( 1) C 36 - H 61 | 0.05 | 0.72 | 0.008 |
| 39. BD ( 1) C 17 - H 28 | /636. BD* ( 1) C 36 - H 61 | 0.03 | 0.96 | 0.007 |
| 141. LP ( 2) N 11       | /395. RY* ( 1) C 37        | 0.05 | 1.61 | 0.011 |
| 141. LP ( 2) N 11       | /396. RY* ( 2) C 37        | 0.10 | 1.58 | 0.016 |
| 141. LP ( 2) N 11       | /398. RY* ( 4) C 37        | 0.10 | 1.43 | 0.016 |
| 141. LP ( 2) N 11       | /399. RY* ( 5) C 37        | 0.03 | 3.44 | 0.014 |
| 141. LP ( 2) N 11       | /400. RY* ( 6) C 37        | 0.04 | 3.60 | 0.015 |
| 141. LP ( 2) N 11       | /436. RY* ( 2) N 42        | 0.17 | 2.04 | 0.024 |
| 141. LP ( 2) N 11       | /437. RY* ( 3) N 42        | 0.27 | 1.76 | 0.028 |
| 141. LP ( 2) N 11       | /443. RY* ( 1) N 43        | 0.03 | 1.32 | 0.008 |
| 141. LP ( 2) N 11       | /445. RY* ( 3) N 43        | 0.06 | 1.56 | 0.012 |
| 141. LP ( 2) N 11       | /453. RY* ( 3) C 44        | 0.03 | 1.38 | 0.008 |
| 141. LP ( 2) N 11       | /467. RY* ( 1) C 46        | 0.23 | 1.64 | 0.025 |
| 141. LP ( 2) N 11       | /468. RY* ( 2) C 46        | 0.05 | 1.88 | 0.013 |
| 141. LP ( 2) N 11       | /469. RY* ( 3) C 46        | 0.09 | 1.20 | 0.013 |
| 141. LP ( 2) N 11       | /471. RY* ( 5) C 46        | 0.06 | 3.47 | 0.018 |
| 141. LP ( 2) N 11       | /541. RY* ( 1) O 65        | 0.50 | 2.56 | 0.046 |
| 141. LP ( 2) N 11       | /543. RY* ( 3) O 65        | 0.03 | 1.96 | 0.009 |
| 141. LP ( 2) N 11       | /544. RY* ( 4) O 65        | 0.10 | 2.01 | 0.018 |
| 141. LP ( 2) N 11       | /656. BD* ( 1) C 46 - O 65 | 0.14 | 0.78 | 0.013 |
| 144. LP ( 1) O 19       | /435. RY* ( 1) N 42        | 0.15 | 1.80 | 0.021 |
| 144. LP ( 1) O 19       | /436. RY* ( 2) N 42        | 0.19 | 2.11 | 0.025 |
| 144. LP ( 1) O 19       | /437. RY* ( 3) N 42        | 0.17 | 1.83 | 0.022 |
| 144. LP ( 1) O 19       | /444. RY* ( 2) N 43        | 0.03 | 1.41 | 0.008 |
| 144. LP ( 1) O 19       | /446. RY* ( 4) N 43        | 0.03 | 2.19 | 0.010 |
| 144. LP ( 1) O 19       | /467. RY* ( 1) C 46        | 0.04 | 1.71 | 0.011 |
| 144. LP ( 1) O 19       | /471. RY* ( 5) C 46        | 0.03 | 3.54 | 0.014 |
| 144. LP ( 1) O 19       | /541. RY* ( 1) O 65        | 0.06 | 2.63 | 0.016 |
| 144. LP ( 1) O 19       | /637. BD* ( 1) C 37 - N 42 | 0.16 | 0.92 | 0.015 |
| 144. LP ( 1) O 19       | /648. BD* ( 1) N 43 - C 44 | 0.06 | 0.91 | 0.010 |

|                           |                            |      |      |       |
|---------------------------|----------------------------|------|------|-------|
| 144. LP ( 1) O 19         | /651. BD* ( 2) C 44 - C 46 | 0.08 | 0.55 | 0.009 |
| 145. LP ( 2) O 19         | /395. RY* ( 1) C 37        | 0.03 | 1.63 | 0.009 |
| 145. LP ( 2) O 19         | /396. RY* ( 2) C 37        | 0.05 | 1.60 | 0.011 |
| 145. LP ( 2) O 19         | /398. RY* ( 4) C 37        | 0.04 | 1.45 | 0.010 |
| 145. LP ( 2) O 19         | /435. RY* ( 1) N 42        | 0.03 | 1.75 | 0.009 |
| 145. LP ( 2) O 19         | /436. RY* ( 2) N 42        | 0.17 | 2.06 | 0.024 |
| 145. LP ( 2) O 19         | /437. RY* ( 3) N 42        | 0.22 | 1.78 | 0.025 |
| 145. LP ( 2) O 19         | /467. RY* ( 1) C 46        | 0.06 | 1.66 | 0.013 |
| 145. LP ( 2) O 19         | /469. RY* ( 3) C 46        | 0.03 | 1.22 | 0.007 |
| 145. LP ( 2) O 19         | /471. RY* ( 5) C 46        | 0.03 | 3.49 | 0.014 |
| 145. LP ( 2) O 19         | /541. RY* ( 1) O 65        | 0.05 | 2.58 | 0.015 |
| 145. LP ( 2) O 19         | /544. RY* ( 4) O 65        | 0.05 | 2.03 | 0.013 |
| 145. LP ( 2) O 19         | /637. BD* ( 1) C 37 - N 42 | 0.17 | 0.87 | 0.015 |
| 145. LP ( 2) O 19         | /648. BD* ( 1) N 43 - C 44 | 0.03 | 0.86 | 0.007 |
| 145. LP ( 2) O 19         | /656. BD* ( 1) C 46 - O 65 | 0.03 | 0.80 | 0.006 |
| 146. LP ( 3) O 19         | /395. RY* ( 1) C 37        | 0.03 | 1.47 | 0.009 |
| 146. LP ( 3) O 19         | /397. RY* ( 3) C 37        | 0.03 | 1.41 | 0.008 |
| 146. LP ( 3) O 19         | /435. RY* ( 1) N 42        | 0.49 | 1.60 | 0.036 |
| 146. LP ( 3) O 19         | /436. RY* ( 2) N 42        | 0.31 | 1.91 | 0.032 |
| 146. LP ( 3) O 19         | /437. RY* ( 3) N 42        | 0.14 | 1.63 | 0.020 |
| 146. LP ( 3) O 19         | /438. RY* ( 4) N 42        | 0.03 | 1.82 | 0.010 |
| 146. LP ( 3) O 19         | /444. RY* ( 2) N 43        | 0.03 | 1.21 | 0.007 |
| 146. LP ( 3) O 19         | /445. RY* ( 3) N 43        | 0.04 | 1.42 | 0.009 |
| 146. LP ( 3) O 19         | /453. RY* ( 3) C 44        | 0.03 | 1.25 | 0.007 |
| 146. LP ( 3) O 19         | /467. RY* ( 1) C 46        | 0.05 | 1.51 | 0.012 |
| 146. LP ( 3) O 19         | /468. RY* ( 2) C 46        | 0.05 | 1.75 | 0.012 |
| 146. LP ( 3) O 19         | /469. RY* ( 3) C 46        | 0.06 | 1.06 | 0.011 |
| 146. LP ( 3) O 19         | /541. RY* ( 1) O 65        | 0.03 | 2.43 | 0.012 |
| 146. LP ( 3) O 19         | /544. RY* ( 4) O 65        | 0.03 | 1.88 | 0.011 |
| 146. LP ( 3) O 19         | /637. BD* ( 1) C 37 - N 42 | 0.15 | 0.72 | 0.013 |
| 146. LP ( 3) O 19         | /647. BD* ( 1) N 42 - N 43 | 0.04 | 0.84 | 0.007 |
| 619. BD* ( 2) C 17 - C 18 | /636. BD* ( 1) C 36 - H 61 | 0.06 | 0.41 | 0.017 |

from unit 1 to unit 3

|                           |                            |      |      |       |
|---------------------------|----------------------------|------|------|-------|
| 25. BD ( 1) N 11 - N 12   | /529. RY* ( 1) O 62        | 0.03 | 2.74 | 0.011 |
| 26. BD ( 1) N 12 - C 13   | /529. RY* ( 1) O 62        | 0.03 | 2.55 | 0.012 |
| 26. BD ( 1) N 12 - C 13   | /537. RY* ( 1) H 63        | 0.03 | 1.31 | 0.007 |
| 28. BD ( 1) C 13 - C 15   | /539. RY* ( 1) H 64        | 0.03 | 1.39 | 0.008 |
| 29. BD ( 2) C 13 - C 15   | /665. BD* ( 1) O 62 - H 64 | 0.18 | 0.61 | 0.014 |
| 33. BD ( 1) C 15 - C 17   | /529. RY* ( 1) O 62        | 0.03 | 2.41 | 0.010 |
| 33. BD ( 1) C 15 - C 17   | /539. RY* ( 1) H 64        | 0.03 | 1.27 | 0.008 |
| 140. LP ( 1) N 11         | /529. RY* ( 1) O 62        | 0.03 | 2.06 | 0.010 |
| 140. LP ( 1) N 11         | /664. BD* ( 1) O 62 - H 63 | 0.12 | 0.61 | 0.011 |
| 141. LP ( 2) N 11         | /529. RY* ( 1) O 62        | 0.91 | 2.24 | 0.059 |
| 141. LP ( 2) N 11         | /530. RY* ( 2) O 62        | 0.21 | 1.85 | 0.025 |
| 141. LP ( 2) N 11         | /531. RY* ( 3) O 62        | 0.10 | 1.55 | 0.016 |
| 141. LP ( 2) N 11         | /532. RY* ( 4) O 62        | 0.14 | 1.70 | 0.020 |
| 141. LP ( 2) N 11         | /537. RY* ( 1) H 63        | 0.28 | 1.01 | 0.022 |
| 141. LP ( 2) N 11         | /539. RY* ( 1) H 64        | 0.28 | 1.10 | 0.023 |
| 141. LP ( 2) N 11         | /664. BD* ( 1) O 62 - H 63 | 0.05 | 0.79 | 0.008 |
| 144. LP ( 1) O 19         | /529. RY* ( 1) O 62        | 0.16 | 2.31 | 0.024 |
| 144. LP ( 1) O 19         | /530. RY* ( 2) O 62        | 0.03 | 1.92 | 0.009 |
| 144. LP ( 1) O 19         | /537. RY* ( 1) H 63        | 0.04 | 1.08 | 0.009 |
| 144. LP ( 1) O 19         | /539. RY* ( 1) H 64        | 0.05 | 1.17 | 0.010 |
| 145. LP ( 2) O 19         | /529. RY* ( 1) O 62        | 0.41 | 2.26 | 0.039 |
| 145. LP ( 2) O 19         | /530. RY* ( 2) O 62        | 0.09 | 1.87 | 0.016 |
| 145. LP ( 2) O 19         | /531. RY* ( 3) O 62        | 0.03 | 1.57 | 0.008 |
| 145. LP ( 2) O 19         | /532. RY* ( 4) O 62        | 0.06 | 1.72 | 0.013 |
| 145. LP ( 2) O 19         | /537. RY* ( 1) H 63        | 0.09 | 1.03 | 0.012 |
| 145. LP ( 2) O 19         | /539. RY* ( 1) H 64        | 0.16 | 1.12 | 0.017 |
| 145. LP ( 2) O 19         | /664. BD* ( 1) O 62 - H 63 | 0.03 | 0.81 | 0.006 |
| 145. LP ( 2) O 19         | /665. BD* ( 1) O 62 - H 64 | 0.06 | 0.81 | 0.009 |
| 146. LP ( 3) O 19         | /529. RY* ( 1) O 62        | 0.14 | 2.11 | 0.023 |
| 146. LP ( 3) O 19         | /530. RY* ( 2) O 62        | 0.06 | 1.72 | 0.013 |
| 146. LP ( 3) O 19         | /532. RY* ( 4) O 62        | 0.03 | 1.57 | 0.009 |
| 146. LP ( 3) O 19         | /539. RY* ( 1) H 64        | 0.03 | 0.97 | 0.007 |
| 146. LP ( 3) O 19         | /665. BD* ( 1) O 62 - H 64 | 0.04 | 0.66 | 0.006 |
| 610. BD* ( 2) C 13 - C 15 | /665. BD* ( 1) O 62 - H 64 | 0.04 | 0.29 | 0.009 |

from unit 1 to unit 4

|                         |                      |      |      |       |
|-------------------------|----------------------|------|------|-------|
| 26. BD ( 1) N 12 - C 13 | /551. RY* ( 3) C1 66 | 0.03 | 2.17 | 0.010 |
|-------------------------|----------------------|------|------|-------|

|                       |    |   |    |   |        |       |       |     |    |     |    |      |       |        |       |
|-----------------------|----|---|----|---|--------|-------|-------|-----|----|-----|----|------|-------|--------|-------|
| 141.                  | LP | ( | 2) | N | 11     | /549. | RY*   | (   | 1) | Cl  | 66 | 0.16 | 1.06  | 0.017  |       |
| 141.                  | LP | ( | 2) | N | 11     | /550. | RY*   | (   | 2) | Cl  | 66 | 0.21 | 1.11  | 0.020  |       |
| 141.                  | LP | ( | 2) | N | 11     | /551. | RY*   | (   | 3) | Cl  | 66 | 0.51 | 1.86  | 0.040  |       |
| 144.                  | LP | ( | 1) | O | 19     | /550. | RY*   | (   | 2) | Cl  | 66 | 0.04 | 1.18  | 0.008  |       |
| 144.                  | LP | ( | 1) | O | 19     | /551. | RY*   | (   | 3) | Cl  | 66 | 0.11 | 1.93  | 0.018  |       |
| 145.                  | LP | ( | 2) | O | 19     | /549. | RY*   | (   | 1) | Cl  | 66 | 0.04 | 1.08  | 0.008  |       |
| 145.                  | LP | ( | 2) | O | 19     | /550. | RY*   | (   | 2) | Cl  | 66 | 0.13 | 1.13  | 0.016  |       |
| 145.                  | LP | ( | 2) | O | 19     | /551. | RY*   | (   | 3) | Cl  | 66 | 0.32 | 1.88  | 0.032  |       |
| 146.                  | LP | ( | 3) | O | 19     | /549. | RY*   | (   | 1) | Cl  | 66 | 0.05 | 0.93  | 0.009  |       |
| 146.                  | LP | ( | 3) | O | 19     | /550. | RY*   | (   | 2) | Cl  | 66 | 0.05 | 0.98  | 0.009  |       |
| 146.                  | LP | ( | 3) | O | 19     | /551. | RY*   | (   | 3) | Cl  | 66 | 0.11 | 1.73  | 0.018  |       |
| from unit 1 to unit 5 |    |   |    |   |        |       |       |     |    |     |    |      |       |        |       |
| 10.                   | BD | ( | 1) | C | 4 - C  | 6     | /169. | LP* | (  | 6)  | Fe | 67   | 0.10  | 1.17   | 0.015 |
| 10.                   | BD | ( | 1) | C | 4 - C  | 6     | /561. | RY* | (  | 1)  | Fe | 67   | 0.03  | 1.28   | 0.008 |
| 12.                   | BD | ( | 1) | C | 5 - C  | 6     | /172. | LP* | (  | 9)  | Fe | 67   | 0.03  | 2.44   | 0.011 |
| 12.                   | BD | ( | 1) | C | 5 - C  | 6     | /561. | RY* | (  | 1)  | Fe | 67   | 0.06  | 1.39   | 0.012 |
| 12.                   | BD | ( | 1) | C | 5 - C  | 6     | /571. | RY* | (  | 11) | Fe | 67   | 0.03  | 10.29  | 0.022 |
| 15.                   | BD | ( | 1) | C | 6 - N  | 11    | /169. | LP* | (  | 6)  | Fe | 67   | 1.14  | 1.31   | 0.053 |
| 15.                   | BD | ( | 1) | C | 6 - N  | 11    | /170. | LP* | (  | 7)  | Fe | 67   | 0.07  | 2.28   | 0.015 |
| 15.                   | BD | ( | 1) | C | 6 - N  | 11    | /561. | RY* | (  | 1)  | Fe | 67   | 0.03  | 1.42   | 0.009 |
| 15.                   | BD | ( | 1) | C | 6 - N  | 11    | /562. | RY* | (  | 2)  | Fe | 67   | 0.03  | 2.39   | 0.011 |
| 15.                   | BD | ( | 1) | C | 6 - N  | 11    | /563. | RY* | (  | 3)  | Fe | 67   | 0.09  | 4.94   | 0.026 |
| 15.                   | BD | ( | 1) | C | 6 - N  | 11    | /564. | RY* | (  | 4)  | Fe | 67   | 0.04  | 2.17   | 0.012 |
| 15.                   | BD | ( | 1) | C | 6 - N  | 11    | /567. | RY* | (  | 7)  | Fe | 67   | 0.07  | 2.85   | 0.017 |
| 15.                   | BD | ( | 1) | C | 6 - N  | 11    | /571. | RY* | (  | 11) | Fe | 67   | 0.03  | 10.33  | 0.021 |
| 15.                   | BD | ( | 1) | C | 6 - N  | 11    | /575. | RY* | (  | 15) | Fe | 67   | 0.04  | 166.16 | 0.100 |
| 15.                   | BD | ( | 1) | C | 6 - N  | 11    | /580. | RY* | (  | 20) | Fe | 67   | 0.08  | 48.80  | 0.078 |
| 25.                   | BD | ( | 1) | N | 11 - N | 12    | /169. | LP* | (  | 6)  | Fe | 67   | 1.10  | 1.51   | 0.056 |
| 25.                   | BD | ( | 1) | N | 11 - N | 12    | /563. | RY* | (  | 3)  | Fe | 67   | 0.31  | 5.13   | 0.050 |
| 25.                   | BD | ( | 1) | N | 11 - N | 12    | /569. | RY* | (  | 9)  | Fe | 67   | 0.04  | 10.16  | 0.024 |
| 25.                   | BD | ( | 1) | N | 11 - N | 12    | /570. | RY* | (  | 10) | Fe | 67   | 0.03  | 6.85   | 0.018 |
| 25.                   | BD | ( | 1) | N | 11 - N | 12    | /575. | RY* | (  | 15) | Fe | 67   | 0.06  | 166.36 | 0.125 |
| 25.                   | BD | ( | 1) | N | 11 - N | 12    | /579. | RY* | (  | 19) | Fe | 67   | 0.03  | 730.90 | 0.195 |
| 25.                   | BD | ( | 1) | N | 11 - N | 12    | /580. | RY* | (  | 20) | Fe | 67   | 0.11  | 49.00  | 0.094 |
| 26.                   | BD | ( | 1) | N | 12 - C | 13    | /169. | LP* | (  | 6)  | Fe | 67   | 0.14  | 1.31   | 0.018 |
| 26.                   | BD | ( | 1) | N | 12 - C | 13    | /172. | LP* | (  | 9)  | Fe | 67   | 0.03  | 2.47   | 0.010 |
| 26.                   | BD | ( | 1) | N | 12 - C | 13    | /561. | RY* | (  | 1)  | Fe | 67   | 0.06  | 1.42   | 0.012 |
| 26.                   | BD | ( | 1) | N | 12 - C | 13    | /563. | RY* | (  | 3)  | Fe | 67   | 0.12  | 4.94   | 0.031 |
| 26.                   | BD | ( | 1) | N | 12 - C | 13    | /567. | RY* | (  | 7)  | Fe | 67   | 0.04  | 2.85   | 0.013 |
| 26.                   | BD | ( | 1) | N | 12 - C | 13    | /571. | RY* | (  | 11) | Fe | 67   | 0.08  | 10.33  | 0.037 |
| 26.                   | BD | ( | 1) | N | 12 - C | 13    | /575. | RY* | (  | 15) | Fe | 67   | 0.07  | 166.16 | 0.135 |
| 26.                   | BD | ( | 1) | N | 12 - C | 13    | /576. | RY* | (  | 16) | Fe | 67   | 0.03  | 30.87  | 0.035 |
| 26.                   | BD | ( | 1) | N | 12 - C | 13    | /579. | RY* | (  | 19) | Fe | 67   | 0.03  | 730.71 | 0.198 |
| 26.                   | BD | ( | 1) | N | 12 - C | 13    | /580. | RY* | (  | 20) | Fe | 67   | 0.14  | 48.80  | 0.104 |
| 27.                   | BD | ( | 1) | C | 13 - C | 14    | /169. | LP* | (  | 6)  | Fe | 67   | 0.04  | 1.17   | 0.009 |
| 28.                   | BD | ( | 1) | C | 13 - C | 15    | /169. | LP* | (  | 6)  | Fe | 67   | 0.18  | 1.30   | 0.021 |
| 28.                   | BD | ( | 1) | C | 13 - C | 15    | /561. | RY* | (  | 1)  | Fe | 67   | 0.04  | 1.41   | 0.009 |
| 28.                   | BD | ( | 1) | C | 13 - C | 15    | /563. | RY* | (  | 3)  | Fe | 67   | 0.05  | 4.92   | 0.019 |
| 28.                   | BD | ( | 1) | C | 13 - C | 15    | /580. | RY* | (  | 20) | Fe | 67   | 0.03  | 48.79  | 0.052 |
| 29.                   | BD | ( | 2) | C | 13 - C | 15    | /169. | LP* | (  | 6)  | Fe | 67   | 0.20  | 0.82   | 0.016 |
| 29.                   | BD | ( | 2) | C | 13 - C | 15    | /563. | RY* | (  | 3)  | Fe | 67   | 0.03  | 4.45   | 0.016 |
| 33.                   | BD | ( | 1) | C | 15 - C | 17    | /169. | LP* | (  | 6)  | Fe | 67   | 0.21  | 1.18   | 0.022 |
| 33.                   | BD | ( | 1) | C | 15 - C | 17    | /170. | LP* | (  | 7)  | Fe | 67   | 0.04  | 2.15   | 0.011 |
| 33.                   | BD | ( | 1) | C | 15 - C | 17    | /561. | RY* | (  | 1)  | Fe | 67   | 0.03  | 1.29   | 0.008 |
| 33.                   | BD | ( | 1) | C | 15 - C | 17    | /563. | RY* | (  | 3)  | Fe | 67   | 0.05  | 4.81   | 0.019 |
| 33.                   | BD | ( | 1) | C | 15 - C | 17    | /580. | RY* | (  | 20) | Fe | 67   | 0.04  | 48.67  | 0.054 |
| 34.                   | BD | ( | 1) | C | 15 - O | 19    | /169. | LP* | (  | 6)  | Fe | 67   | 0.90  | 1.39   | 0.048 |
| 34.                   | BD | ( | 1) | C | 15 - O | 19    | /170. | LP* | (  | 7)  | Fe | 67   | 0.17  | 2.36   | 0.025 |
| 34.                   | BD | ( | 1) | C | 15 - O | 19    | /171. | LP* | (  | 8)  | Fe | 67   | 0.03  | 2.61   | 0.011 |
| 34.                   | BD | ( | 1) | C | 15 - O | 19    | /563. | RY* | (  | 3)  | Fe | 67   | 0.03  | 5.01   | 0.016 |
| 34.                   | BD | ( | 1) | C | 15 - O | 19    | /568. | RY* | (  | 8)  | Fe | 67   | 0.07  | 9.68   | 0.032 |
| 34.                   | BD | ( | 1) | C | 15 - O | 19    | /569. | RY* | (  | 9)  | Fe | 67   | 0.06  | 10.04  | 0.032 |
| 34.                   | BD | ( | 1) | C | 15 - O | 19    | /581. | RY* | (  | 21) | Fe | 67   | 0.03  | 30.63  | 0.036 |
| 90.                   | CR | ( | 1) | C | 6      | /169. | LP*   | (   | 6) | Fe  | 67 | 0.03 | 10.61 | 0.024  |       |
| 95.                   | CR | ( | 1) | N | 11     | /169. | LP*   | (   | 6) | Fe  | 67 | 1.18 | 14.73 | 0.181  |       |
| 96.                   | CR | ( | 1) | N | 12     | /169. | LP*   | (   | 6) | Fe  | 67 | 0.04 | 14.73 | 0.033  |       |
| 99.                   | CR | ( | 1) | C | 15     | /169. | LP*   | (   | 6) | Fe  | 67 | 0.06 | 10.64 | 0.034  |       |
| 103.                  | CR | ( | 1) | O | 19     | /169. | LP*   | (   | 6) | Fe  | 67 | 1.38 | 19.44 | 0.224  |       |
| 140.                  | LP | ( | 1) | N | 11     | /169. | LP*   | (   | 6) | Fe  | 67 | 1.34 | 0.83  | 0.044  |       |
| 140.                  | LP | ( | 1) | N | 11     | /171. | LP*   | (   | 8) | Fe  | 67 | 0.03 | 2.05  | 0.011  |       |

|      |    |   |    |   |    |       |     |   |     |    |    |       |        |       |
|------|----|---|----|---|----|-------|-----|---|-----|----|----|-------|--------|-------|
| 140. | LP | ( | 1) | N | 11 | /172. | LP* | ( | 9)  | Fe | 67 | 0.10  | 1.98   | 0.018 |
| 140. | LP | ( | 1) | N | 11 | /563. | RY* | ( | 3)  | Fe | 67 | 0.15  | 4.45   | 0.033 |
| 140. | LP | ( | 1) | N | 11 | /567. | RY* | ( | 7)  | Fe | 67 | 0.07  | 2.36   | 0.017 |
| 140. | LP | ( | 1) | N | 11 | /573. | RY* | ( | 13) | Fe | 67 | 0.03  | 6.98   | 0.020 |
| 140. | LP | ( | 1) | N | 11 | /575. | RY* | ( | 15) | Fe | 67 | 0.05  | 165.67 | 0.118 |
| 140. | LP | ( | 1) | N | 11 | /580. | RY* | ( | 20) | Fe | 67 | 0.10  | 48.32  | 0.089 |
| 141. | LP | ( | 2) | N | 11 | /169. | LP* | ( | 6)  | Fe | 67 | 24.59 | 1.01   | 0.209 |
| 141. | LP | ( | 2) | N | 11 | /170. | LP* | ( | 7)  | Fe | 67 | 0.45  | 1.98   | 0.039 |
| 141. | LP | ( | 2) | N | 11 | /172. | LP* | ( | 9)  | Fe | 67 | 0.99  | 2.16   | 0.060 |
| 141. | LP | ( | 2) | N | 11 | /561. | RY* | ( | 1)  | Fe | 67 | 0.50  | 1.12   | 0.031 |
| 141. | LP | ( | 2) | N | 11 | /562. | RY* | ( | 2)  | Fe | 67 | 0.66  | 2.09   | 0.048 |
| 141. | LP | ( | 2) | N | 11 | /563. | RY* | ( | 3)  | Fe | 67 | 3.78  | 4.63   | 0.172 |
| 141. | LP | ( | 2) | N | 11 | /564. | RY* | ( | 4)  | Fe | 67 | 0.21  | 1.87   | 0.026 |
| 141. | LP | ( | 2) | N | 11 | /567. | RY* | ( | 7)  | Fe | 67 | 0.95  | 2.54   | 0.064 |
| 141. | LP | ( | 2) | N | 11 | /570. | RY* | ( | 10) | Fe | 67 | 0.22  | 6.35   | 0.049 |
| 141. | LP | ( | 2) | N | 11 | /571. | RY* | ( | 11) | Fe | 67 | 0.05  | 10.02  | 0.030 |
| 141. | LP | ( | 2) | N | 11 | /572. | RY* | ( | 12) | Fe | 67 | 0.17  | 7.20   | 0.045 |
| 141. | LP | ( | 2) | N | 11 | /573. | RY* | ( | 13) | Fe | 67 | 0.23  | 7.16   | 0.053 |
| 141. | LP | ( | 2) | N | 11 | /574. | RY* | ( | 14) | Fe | 67 | 0.22  | 7.00   | 0.051 |
| 141. | LP | ( | 2) | N | 11 | /575. | RY* | ( | 15) | Fe | 67 | 1.45  | 165.86 | 0.636 |
| 141. | LP | ( | 2) | N | 11 | /576. | RY* | ( | 16) | Fe | 67 | 0.03  | 30.56  | 0.041 |
| 141. | LP | ( | 2) | N | 11 | /579. | RY* | ( | 19) | Fe | 67 | 0.67  | 730.40 | 0.907 |
| 141. | LP | ( | 2) | N | 11 | /580. | RY* | ( | 20) | Fe | 67 | 2.89  | 48.50  | 0.486 |
| 142. | LP | ( | 1) | N | 12 | /169. | LP* | ( | 6)  | Fe | 67 | 0.27  | 0.93   | 0.021 |
| 142. | LP | ( | 1) | N | 12 | /172. | LP* | ( | 9)  | Fe | 67 | 0.10  | 2.08   | 0.018 |
| 142. | LP | ( | 1) | N | 12 | /563. | RY* | ( | 3)  | Fe | 67 | 0.03  | 4.55   | 0.015 |
| 144. | LP | ( | 1) | O | 19 | /169. | LP* | ( | 6)  | Fe | 67 | 4.27  | 1.08   | 0.092 |
| 144. | LP | ( | 1) | O | 19 | /170. | LP* | ( | 7)  | Fe | 67 | 0.10  | 2.05   | 0.018 |
| 144. | LP | ( | 1) | O | 19 | /171. | LP* | ( | 8)  | Fe | 67 | 0.04  | 2.30   | 0.012 |
| 144. | LP | ( | 1) | O | 19 | /172. | LP* | ( | 9)  | Fe | 67 | 0.14  | 2.23   | 0.022 |
| 144. | LP | ( | 1) | O | 19 | /561. | RY* | ( | 1)  | Fe | 67 | 0.04  | 1.19   | 0.008 |
| 144. | LP | ( | 1) | O | 19 | /562. | RY* | ( | 2)  | Fe | 67 | 0.32  | 2.16   | 0.033 |
| 144. | LP | ( | 1) | O | 19 | /563. | RY* | ( | 3)  | Fe | 67 | 0.64  | 4.70   | 0.070 |
| 144. | LP | ( | 1) | O | 19 | /564. | RY* | ( | 4)  | Fe | 67 | 0.05  | 1.94   | 0.012 |
| 144. | LP | ( | 1) | O | 19 | /566. | RY* | ( | 6)  | Fe | 67 | 0.07  | 2.32   | 0.017 |
| 144. | LP | ( | 1) | O | 19 | /567. | RY* | ( | 7)  | Fe | 67 | 0.16  | 2.61   | 0.026 |
| 144. | LP | ( | 1) | O | 19 | /574. | RY* | ( | 14) | Fe | 67 | 0.05  | 7.07   | 0.024 |
| 144. | LP | ( | 1) | O | 19 | /575. | RY* | ( | 15) | Fe | 67 | 0.24  | 165.93 | 0.252 |
| 144. | LP | ( | 1) | O | 19 | /579. | RY* | ( | 19) | Fe | 67 | 0.13  | 730.47 | 0.390 |
| 144. | LP | ( | 1) | O | 19 | /580. | RY* | ( | 20) | Fe | 67 | 0.48  | 48.57  | 0.193 |
| 145. | LP | ( | 2) | O | 19 | /169. | LP* | ( | 6)  | Fe | 67 | 13.85 | 1.03   | 0.160 |
| 145. | LP | ( | 2) | O | 19 | /170. | LP* | ( | 7)  | Fe | 67 | 1.29  | 2.00   | 0.065 |
| 145. | LP | ( | 2) | O | 19 | /171. | LP* | ( | 8)  | Fe | 67 | 0.03  | 2.25   | 0.011 |
| 145. | LP | ( | 2) | O | 19 | /172. | LP* | ( | 9)  | Fe | 67 | 0.06  | 2.18   | 0.015 |
| 145. | LP | ( | 2) | O | 19 | /561. | RY* | ( | 1)  | Fe | 67 | 0.63  | 1.14   | 0.034 |
| 145. | LP | ( | 2) | O | 19 | /562. | RY* | ( | 2)  | Fe | 67 | 1.05  | 2.11   | 0.060 |
| 145. | LP | ( | 2) | O | 19 | /563. | RY* | ( | 3)  | Fe | 67 | 1.22  | 4.65   | 0.097 |
| 145. | LP | ( | 2) | O | 19 | /565. | RY* | ( | 5)  | Fe | 67 | 0.11  | 1.97   | 0.019 |
| 145. | LP | ( | 2) | O | 19 | /566. | RY* | ( | 6)  | Fe | 67 | 0.09  | 2.27   | 0.019 |
| 145. | LP | ( | 2) | O | 19 | /567. | RY* | ( | 7)  | Fe | 67 | 0.44  | 2.56   | 0.043 |
| 145. | LP | ( | 2) | O | 19 | /568. | RY* | ( | 8)  | Fe | 67 | 0.05  | 9.32   | 0.029 |
| 145. | LP | ( | 2) | O | 19 | /570. | RY* | ( | 10) | Fe | 67 | 0.08  | 6.37   | 0.029 |
| 145. | LP | ( | 2) | O | 19 | /573. | RY* | ( | 13) | Fe | 67 | 0.03  | 7.18   | 0.018 |
| 145. | LP | ( | 2) | O | 19 | /574. | RY* | ( | 14) | Fe | 67 | 0.10  | 7.02   | 0.034 |
| 145. | LP | ( | 2) | O | 19 | /575. | RY* | ( | 15) | Fe | 67 | 0.67  | 165.88 | 0.428 |
| 145. | LP | ( | 2) | O | 19 | /579. | RY* | ( | 19) | Fe | 67 | 0.32  | 730.42 | 0.620 |
| 145. | LP | ( | 2) | O | 19 | /580. | RY* | ( | 20) | Fe | 67 | 1.36  | 48.52  | 0.330 |
| 146. | LP | ( | 3) | O | 19 | /169. | LP* | ( | 6)  | Fe | 67 | 8.48  | 0.87   | 0.114 |
| 146. | LP | ( | 3) | O | 19 | /170. | LP* | ( | 7)  | Fe | 67 | 0.92  | 1.84   | 0.053 |
| 146. | LP | ( | 3) | O | 19 | /172. | LP* | ( | 9)  | Fe | 67 | 0.35  | 2.03   | 0.035 |
| 146. | LP | ( | 3) | O | 19 | /561. | RY* | ( | 1)  | Fe | 67 | 0.39  | 0.98   | 0.026 |
| 146. | LP | ( | 3) | O | 19 | /562. | RY* | ( | 2)  | Fe | 67 | 0.38  | 1.96   | 0.035 |
| 146. | LP | ( | 3) | O | 19 | /563. | RY* | ( | 3)  | Fe | 67 | 0.60  | 4.50   | 0.068 |
| 146. | LP | ( | 3) | O | 19 | /567. | RY* | ( | 7)  | Fe | 67 | 0.23  | 2.41   | 0.031 |
| 146. | LP | ( | 3) | O | 19 | /568. | RY* | ( | 8)  | Fe | 67 | 0.03  | 9.16   | 0.023 |
| 146. | LP | ( | 3) | O | 19 | /574. | RY* | ( | 14) | Fe | 67 | 0.07  | 6.87   | 0.029 |
| 146. | LP | ( | 3) | O | 19 | /575. | RY* | ( | 15) | Fe | 67 | 0.34  | 165.72 | 0.311 |
| 146. | LP | ( | 3) | O | 19 | /579. | RY* | ( | 19) | Fe | 67 | 0.15  | 730.27 | 0.434 |
| 146. | LP | ( | 3) | O | 19 | /580. | RY* | ( | 20) | Fe | 67 | 0.71  | 48.36  | 0.242 |

from unit 2 to unit 1

|                           |                            |      |      |       |
|---------------------------|----------------------------|------|------|-------|
| 55. BD ( 1) C 36 - H 61   | /610. BD* ( 2) C 13 - C 15 | 0.03 | 0.55 | 0.006 |
| 55. BD ( 1) C 36 - H 61   | /619. BD* ( 2) C 17 - C 18 | 0.05 | 0.56 | 0.007 |
| 66. BD ( 1) N 42 - N 43   | /317. RY* ( 1) O 19        | 0.03 | 3.15 | 0.012 |
| 66. BD ( 1) N 42 - N 43   | /318. RY* ( 2) O 19        | 0.05 | 2.25 | 0.014 |
| 67. BD ( 1) N 43 - C 44   | /319. RY* ( 3) O 19        | 0.04 | 1.87 | 0.011 |
| 69. BD ( 1) C 44 - C 46   | /319. RY* ( 3) O 19        | 0.04 | 1.88 | 0.011 |
| 70. BD ( 2) C 44 - C 46   | /615. BD* ( 1) C 15 - O 19 | 0.04 | 0.63 | 0.007 |
| 74. BD ( 1) C 46 - C 48   | /237. RY* ( 1) C 9         | 0.04 | 1.87 | 0.012 |
| 74. BD ( 1) C 46 - C 48   | /239. RY* ( 3) C 9         | 0.07 | 1.26 | 0.012 |
| 75. BD ( 1) C 46 - O 65   | /214. RY* ( 2) C 6         | 0.03 | 1.85 | 0.009 |
| 75. BD ( 1) C 46 - O 65   | /215. RY* ( 3) C 6         | 0.03 | 2.00 | 0.009 |
| 80. BD ( 1) C 48 - H 58   | /239. RY* ( 3) C 9         | 0.03 | 1.12 | 0.008 |
| 149. LP ( 1) N 42         | /208. RY* ( 4) C 5         | 0.03 | 1.35 | 0.008 |
| 149. LP ( 1) N 42         | /213. RY* ( 1) C 6         | 0.03 | 1.60 | 0.009 |
| 149. LP ( 1) N 42         | /218. RY* ( 6) C 6         | 0.03 | 3.70 | 0.013 |
| 149. LP ( 1) N 42         | /253. RY* ( 1) N 11        | 0.15 | 1.56 | 0.020 |
| 149. LP ( 1) N 42         | /254. RY* ( 2) N 11        | 0.19 | 2.20 | 0.027 |
| 149. LP ( 1) N 42         | /255. RY* ( 3) N 11        | 0.15 | 1.69 | 0.021 |
| 149. LP ( 1) N 42         | /263. RY* ( 3) N 12        | 0.03 | 1.52 | 0.009 |
| 149. LP ( 1) N 42         | /271. RY* ( 3) C 13        | 0.03 | 1.39 | 0.008 |
| 149. LP ( 1) N 42         | /285. RY* ( 1) C 15        | 0.21 | 1.58 | 0.024 |
| 149. LP ( 1) N 42         | /286. RY* ( 2) C 15        | 0.05 | 1.88 | 0.012 |
| 149. LP ( 1) N 42         | /288. RY* ( 4) C 15        | 0.05 | 1.12 | 0.009 |
| 149. LP ( 1) N 42         | /289. RY* ( 5) C 15        | 0.04 | 3.45 | 0.015 |
| 149. LP ( 1) N 42         | /317. RY* ( 1) O 19        | 0.63 | 2.63 | 0.052 |
| 149. LP ( 1) N 42         | /318. RY* ( 2) O 19        | 0.11 | 1.73 | 0.017 |
| 149. LP ( 1) N 42         | /319. RY* ( 3) O 19        | 0.08 | 1.55 | 0.014 |
| 149. LP ( 1) N 42         | /320. RY* ( 4) O 19        | 0.06 | 2.29 | 0.015 |
| 149. LP ( 1) N 42         | /615. BD* ( 1) C 15 - O 19 | 0.95 | 0.77 | 0.035 |
| 150. LP ( 2) N 42         | /318. RY* ( 2) O 19        | 0.10 | 1.60 | 0.017 |
| 157. LP ( 1) O 65         | /253. RY* ( 1) N 11        | 0.04 | 1.71 | 0.010 |
| 157. LP ( 1) O 65         | /254. RY* ( 2) N 11        | 0.08 | 2.35 | 0.018 |
| 157. LP ( 1) O 65         | /255. RY* ( 3) N 11        | 0.03 | 1.84 | 0.010 |
| 157. LP ( 1) O 65         | /256. RY* ( 4) N 11        | 0.04 | 2.14 | 0.011 |
| 157. LP ( 1) O 65         | /285. RY* ( 1) C 15        | 0.04 | 1.73 | 0.011 |
| 157. LP ( 1) O 65         | /317. RY* ( 1) O 19        | 0.05 | 2.78 | 0.015 |
| 157. LP ( 1) O 65         | /594. BD* ( 2) C 5 - C 6   | 0.41 | 0.65 | 0.022 |
| 157. LP ( 1) O 65         | /596. BD* ( 1) C 6 - N 11  | 0.09 | 0.99 | 0.012 |
| 157. LP ( 1) O 65         | /606. BD* ( 1) N 11 - N 12 | 0.10 | 1.11 | 0.013 |
| 158. LP ( 2) O 65         | /253. RY* ( 1) N 11        | 0.04 | 1.60 | 0.011 |
| 158. LP ( 2) O 65         | /254. RY* ( 2) N 11        | 0.16 | 2.25 | 0.024 |
| 158. LP ( 2) O 65         | /255. RY* ( 3) N 11        | 0.11 | 1.73 | 0.018 |
| 158. LP ( 2) O 65         | /263. RY* ( 3) N 12        | 0.03 | 1.57 | 0.009 |
| 158. LP ( 2) O 65         | /285. RY* ( 1) C 15        | 0.06 | 1.63 | 0.012 |
| 158. LP ( 2) O 65         | /288. RY* ( 4) C 15        | 0.04 | 1.17 | 0.008 |
| 158. LP ( 2) O 65         | /289. RY* ( 5) C 15        | 0.03 | 3.50 | 0.012 |
| 158. LP ( 2) O 65         | /317. RY* ( 1) O 19        | 0.04 | 2.68 | 0.013 |
| 159. LP ( 3) O 65         | /213. RY* ( 1) C 6         | 0.06 | 1.54 | 0.012 |
| 159. LP ( 3) O 65         | /214. RY* ( 2) C 6         | 0.04 | 1.37 | 0.009 |
| 159. LP ( 3) O 65         | /215. RY* ( 3) C 6         | 0.03 | 1.52 | 0.008 |
| 159. LP ( 3) O 65         | /216. RY* ( 4) C 6         | 0.05 | 1.38 | 0.011 |
| 159. LP ( 3) O 65         | /253. RY* ( 1) N 11        | 0.08 | 1.49 | 0.014 |
| 159. LP ( 3) O 65         | /254. RY* ( 2) N 11        | 0.22 | 2.14 | 0.028 |
| 159. LP ( 3) O 65         | /255. RY* ( 3) N 11        | 0.30 | 1.62 | 0.028 |
| 159. LP ( 3) O 65         | /256. RY* ( 4) N 11        | 0.03 | 1.92 | 0.009 |
| 159. LP ( 3) O 65         | /263. RY* ( 3) N 12        | 0.07 | 1.46 | 0.013 |
| 159. LP ( 3) O 65         | /285. RY* ( 1) C 15        | 0.05 | 1.52 | 0.012 |
| 159. LP ( 3) O 65         | /286. RY* ( 2) C 15        | 0.03 | 1.81 | 0.010 |
| 159. LP ( 3) O 65         | /288. RY* ( 4) C 15        | 0.04 | 1.06 | 0.008 |
| 159. LP ( 3) O 65         | /594. BD* ( 2) C 5 - C 6   | 0.24 | 0.44 | 0.013 |
| 159. LP ( 3) O 65         | /596. BD* ( 1) C 6 - N 11  | 0.12 | 0.77 | 0.012 |
| 159. LP ( 3) O 65         | /606. BD* ( 1) N 11 - N 12 | 0.47 | 0.89 | 0.026 |
| 651. BD* ( 2) C 44 - C 46 | /603. BD* ( 2) C 9 - C 10  | 0.07 | 0.04 | 0.004 |
| 660. BD* ( 2) C 48 - C 49 | /603. BD* ( 2) C 9 - C 10  | 0.74 | 0.01 | 0.009 |
| within unit 2             |                            |      |      |       |
| 42. BD ( 1) C 32 - C 33   | /371. RY* ( 1) C 34        | 0.66 | 1.97 | 0.046 |
| 42. BD ( 1) C 32 - C 33   | /372. RY* ( 2) C 34        | 0.32 | 1.99 | 0.032 |
| 42. BD ( 1) C 32 - C 33   | /379. RY* ( 1) C 35        | 0.65 | 2.20 | 0.048 |
| 42. BD ( 1) C 32 - C 33   | /403. RY* ( 1) C 38        | 0.58 | 1.85 | 0.042 |
| 42. BD ( 1) C 32 - C 33   | /624. BD* ( 1) C 32 - C 34 | 1.86 | 1.28 | 0.062 |

|                         |                            |      |      |       |
|-------------------------|----------------------------|------|------|-------|
| 42. BD ( 1) C 32 - C 33 | /627. BD* ( 1) C 33 - C 35 | 1.70 | 1.27 | 0.059 |
| 42. BD ( 1) C 32 - C 33 | /629. BD* ( 1) C 33 - C 38 | 0.73 | 1.09 | 0.036 |
| 42. BD ( 1) C 32 - C 33 | /631. BD* ( 1) C 34 - H 51 | 1.45 | 1.09 | 0.050 |
| 42. BD ( 1) C 32 - C 33 | /633. BD* ( 1) C 35 - C 40 | 2.05 | 1.11 | 0.060 |
| 42. BD ( 1) C 32 - C 33 | /638. BD* ( 1) C 38 - C 39 | 0.65 | 1.30 | 0.037 |
| 43. BD ( 1) C 32 - C 34 | /364. RY* ( 2) C 33        | 0.81 | 2.18 | 0.053 |
| 43. BD ( 1) C 32 - C 34 | /388. RY* ( 2) C 36        | 0.54 | 1.87 | 0.040 |
| 43. BD ( 1) C 32 - C 34 | /623. BD* ( 1) C 32 - C 33 | 1.83 | 1.18 | 0.059 |
| 43. BD ( 1) C 32 - C 34 | /626. BD* ( 1) C 32 - O 50 | 0.42 | 1.03 | 0.026 |
| 43. BD ( 1) C 32 - C 34 | /629. BD* ( 1) C 33 - C 38 | 1.21 | 1.20 | 0.048 |
| 43. BD ( 1) C 32 - C 34 | /630. BD* ( 1) C 34 - C 36 | 1.21 | 1.22 | 0.049 |
| 43. BD ( 1) C 32 - C 34 | /631. BD* ( 1) C 34 - H 51 | 0.90 | 1.19 | 0.042 |
| 43. BD ( 1) C 32 - C 34 | /636. BD* ( 1) C 36 - H 61 | 0.70 | 1.21 | 0.037 |
| 43. BD ( 1) C 32 - C 34 | /663. BD* ( 1) O 50 - H 60 | 0.80 | 1.07 | 0.037 |
| 44. BD ( 2) C 32 - C 34 | /366. RY* ( 4) C 33        | 0.35 | 0.89 | 0.023 |
| 44. BD ( 2) C 32 - C 34 | /389. RY* ( 3) C 36        | 0.26 | 1.06 | 0.022 |
| 44. BD ( 2) C 32 - C 34 | /499. RY* ( 1) O 50        | 0.35 | 1.18 | 0.027 |
| 44. BD ( 2) C 32 - C 34 | /625. BD* ( 2) C 32 - C 34 | 0.27 | 0.31 | 0.012 |
| 44. BD ( 2) C 32 - C 34 | /628. BD* ( 2) C 33 - C 35 | 5.84 | 0.32 | 0.057 |
| 44. BD ( 2) C 32 - C 34 | /635. BD* ( 2) C 36 - C 37 | 6.63 | 0.31 | 0.059 |
| 45. BD ( 1) C 32 - O 50 | /355. RY* ( 1) C 32        | 0.32 | 1.98 | 0.032 |
| 45. BD ( 1) C 32 - O 50 | /371. RY* ( 1) C 34        | 0.29 | 2.22 | 0.032 |
| 45. BD ( 1) C 32 - O 50 | /623. BD* ( 1) C 32 - C 33 | 0.27 | 1.32 | 0.024 |
| 45. BD ( 1) C 32 - O 50 | /624. BD* ( 1) C 32 - C 34 | 0.54 | 1.52 | 0.036 |
| 45. BD ( 1) C 32 - O 50 | /627. BD* ( 1) C 33 - C 35 | 0.58 | 1.52 | 0.037 |
| 45. BD ( 1) C 32 - O 50 | /630. BD* ( 1) C 34 - C 36 | 1.12 | 1.36 | 0.049 |
| 46. BD ( 1) C 33 - C 35 | /356. RY* ( 2) C 32        | 0.44 | 2.16 | 0.039 |
| 46. BD ( 1) C 33 - C 35 | /395. RY* ( 1) C 37        | 0.38 | 1.86 | 0.034 |
| 46. BD ( 1) C 33 - C 35 | /397. RY* ( 3) C 37        | 0.28 | 1.80 | 0.029 |
| 46. BD ( 1) C 33 - C 35 | /403. RY* ( 1) C 38        | 0.36 | 1.93 | 0.033 |
| 46. BD ( 1) C 33 - C 35 | /419. RY* ( 1) C 40        | 0.37 | 1.94 | 0.034 |
| 46. BD ( 1) C 33 - C 35 | /623. BD* ( 1) C 32 - C 33 | 1.62 | 1.16 | 0.055 |
| 46. BD ( 1) C 33 - C 35 | /626. BD* ( 1) C 32 - O 50 | 1.35 | 1.01 | 0.047 |
| 46. BD ( 1) C 33 - C 35 | /629. BD* ( 1) C 33 - C 38 | 1.90 | 1.18 | 0.060 |
| 46. BD ( 1) C 33 - C 35 | /632. BD* ( 1) C 35 - C 37 | 1.89 | 1.18 | 0.060 |
| 46. BD ( 1) C 33 - C 35 | /633. BD* ( 1) C 35 - C 40 | 1.81 | 1.19 | 0.059 |
| 46. BD ( 1) C 33 - C 35 | /637. BD* ( 1) C 37 - N 42 | 1.37 | 1.11 | 0.049 |
| 46. BD ( 1) C 33 - C 35 | /640. BD* ( 1) C 38 - H 52 | 0.76 | 1.18 | 0.038 |
| 46. BD ( 1) C 33 - C 35 | /645. BD* ( 1) C 40 - H 54 | 0.69 | 1.19 | 0.036 |
| 47. BD ( 2) C 33 - C 35 | /358. RY* ( 4) C 32        | 0.30 | 0.83 | 0.022 |
| 47. BD ( 2) C 33 - C 35 | /405. RY* ( 3) C 38        | 0.56 | 0.76 | 0.028 |
| 47. BD ( 2) C 33 - C 35 | /421. RY* ( 3) C 40        | 0.51 | 0.84 | 0.028 |
| 47. BD ( 2) C 33 - C 35 | /625. BD* ( 2) C 32 - C 34 | 6.35 | 0.30 | 0.056 |
| 47. BD ( 2) C 33 - C 35 | /635. BD* ( 2) C 36 - C 37 | 6.71 | 0.30 | 0.057 |
| 47. BD ( 2) C 33 - C 35 | /639. BD* ( 2) C 38 - C 39 | 5.80 | 0.31 | 0.055 |
| 47. BD ( 2) C 33 - C 35 | /644. BD* ( 2) C 40 - C 41 | 5.78 | 0.32 | 0.056 |
| 48. BD ( 1) C 33 - C 38 | /355. RY* ( 1) C 32        | 0.28 | 1.72 | 0.028 |
| 48. BD ( 1) C 33 - C 38 | /356. RY* ( 2) C 32        | 0.36 | 2.06 | 0.035 |
| 48. BD ( 1) C 33 - C 38 | /379. RY* ( 1) C 35        | 0.41 | 2.18 | 0.038 |
| 48. BD ( 1) C 33 - C 38 | /380. RY* ( 2) C 35        | 0.27 | 2.17 | 0.031 |
| 48. BD ( 1) C 33 - C 38 | /411. RY* ( 1) C 39        | 0.37 | 1.82 | 0.033 |
| 48. BD ( 1) C 33 - C 38 | /412. RY* ( 2) C 39        | 0.77 | 1.95 | 0.049 |
| 48. BD ( 1) C 33 - C 38 | /623. BD* ( 1) C 32 - C 33 | 0.61 | 1.06 | 0.032 |
| 48. BD ( 1) C 33 - C 38 | /624. BD* ( 1) C 32 - C 34 | 0.71 | 1.26 | 0.038 |
| 48. BD ( 1) C 33 - C 38 | /627. BD* ( 1) C 33 - C 35 | 2.15 | 1.26 | 0.066 |
| 48. BD ( 1) C 33 - C 38 | /632. BD* ( 1) C 35 - C 37 | 2.35 | 1.09 | 0.064 |
| 48. BD ( 1) C 33 - C 38 | /638. BD* ( 1) C 38 - C 39 | 1.40 | 1.29 | 0.054 |
| 48. BD ( 1) C 33 - C 38 | /640. BD* ( 1) C 38 - H 52 | 0.31 | 1.08 | 0.023 |
| 48. BD ( 1) C 33 - C 38 | /642. BD* ( 1) C 39 - H 53 | 1.44 | 1.09 | 0.050 |
| 49. BD ( 1) C 34 - C 36 | /355. RY* ( 1) C 32        | 0.64 | 1.73 | 0.042 |
| 49. BD ( 1) C 34 - C 36 | /356. RY* ( 2) C 32        | 0.38 | 2.07 | 0.035 |
| 49. BD ( 1) C 34 - C 36 | /396. RY* ( 2) C 37        | 0.54 | 1.75 | 0.039 |
| 49. BD ( 1) C 34 - C 36 | /397. RY* ( 3) C 37        | 0.60 | 1.71 | 0.041 |
| 49. BD ( 1) C 34 - C 36 | /624. BD* ( 1) C 32 - C 34 | 1.29 | 1.27 | 0.051 |
| 49. BD ( 1) C 34 - C 36 | /626. BD* ( 1) C 32 - O 50 | 2.50 | 0.92 | 0.061 |
| 49. BD ( 1) C 34 - C 36 | /631. BD* ( 1) C 34 - H 51 | 0.36 | 1.09 | 0.025 |
| 49. BD ( 1) C 34 - C 36 | /634. BD* ( 1) C 36 - C 37 | 1.53 | 1.28 | 0.056 |
| 49. BD ( 1) C 34 - C 36 | /636. BD* ( 1) C 36 - H 61 | 0.35 | 1.10 | 0.025 |
| 49. BD ( 1) C 34 - C 36 | /637. BD* ( 1) C 37 - N 42 | 3.03 | 1.02 | 0.070 |
| 50. BD ( 1) C 34 - H 51 | /356. RY* ( 2) C 32        | 0.47 | 1.93 | 0.038 |
| 50. BD ( 1) C 34 - H 51 | /360. RY* ( 6) C 32        | 0.27 | 8.59 | 0.061 |



|                         |                            |      |      |       |
|-------------------------|----------------------------|------|------|-------|
| 50. BD ( 1) C 34 - H 51 | /387. RY* ( 1) C 36        | 0.52 | 1.88 | 0.040 |
| 50. BD ( 1) C 34 - H 51 | /623. BD* ( 1) C 32 - C 33 | 3.06 | 0.93 | 0.068 |
| 50. BD ( 1) C 34 - H 51 | /624. BD* ( 1) C 32 - C 34 | 0.72 | 1.13 | 0.036 |
| 50. BD ( 1) C 34 - H 51 | /626. BD* ( 1) C 32 - O 50 | 0.84 | 0.79 | 0.032 |
| 50. BD ( 1) C 34 - H 51 | /634. BD* ( 1) C 36 - C 37 | 1.46 | 1.15 | 0.052 |
| 51. BD ( 1) C 35 - C 37 | /363. RY* ( 1) C 33        | 0.73 | 2.29 | 0.052 |
| 51. BD ( 1) C 35 - C 37 | /387. RY* ( 1) C 36        | 0.46 | 2.01 | 0.039 |
| 51. BD ( 1) C 35 - C 37 | /419. RY* ( 1) C 40        | 0.55 | 1.84 | 0.041 |
| 51. BD ( 1) C 35 - C 37 | /435. RY* ( 1) N 42        | 0.30 | 1.89 | 0.030 |
| 51. BD ( 1) C 35 - C 37 | /627. BD* ( 1) C 33 - C 35 | 1.94 | 1.27 | 0.063 |
| 51. BD ( 1) C 35 - C 37 | /629. BD* ( 1) C 33 - C 38 | 2.01 | 1.09 | 0.059 |
| 51. BD ( 1) C 35 - C 37 | /633. BD* ( 1) C 35 - C 40 | 0.88 | 1.10 | 0.039 |
| 51. BD ( 1) C 35 - C 37 | /634. BD* ( 1) C 36 - C 37 | 2.04 | 1.28 | 0.065 |
| 51. BD ( 1) C 35 - C 37 | /636. BD* ( 1) C 36 - H 61 | 1.57 | 1.09 | 0.053 |
| 51. BD ( 1) C 35 - C 37 | /637. BD* ( 1) C 37 - N 42 | 0.38 | 1.02 | 0.025 |
| 51. BD ( 1) C 35 - C 37 | /643. BD* ( 1) C 40 - C 41 | 0.69 | 1.30 | 0.038 |
| 52. BD ( 1) C 35 - C 40 | /363. RY* ( 1) C 33        | 0.38 | 2.28 | 0.037 |
| 52. BD ( 1) C 35 - C 40 | /395. RY* ( 1) C 37        | 0.68 | 1.76 | 0.044 |
| 52. BD ( 1) C 35 - C 40 | /427. RY* ( 1) C 41        | 0.38 | 1.83 | 0.034 |
| 52. BD ( 1) C 35 - C 40 | /428. RY* ( 2) C 41        | 0.77 | 1.96 | 0.049 |
| 52. BD ( 1) C 35 - C 40 | /623. BD* ( 1) C 32 - C 33 | 2.33 | 1.06 | 0.063 |
| 52. BD ( 1) C 35 - C 40 | /627. BD* ( 1) C 33 - C 35 | 2.12 | 1.26 | 0.065 |
| 52. BD ( 1) C 35 - C 40 | /632. BD* ( 1) C 35 - C 37 | 0.89 | 1.08 | 0.039 |
| 52. BD ( 1) C 35 - C 40 | /634. BD* ( 1) C 36 - C 37 | 0.98 | 1.27 | 0.045 |
| 52. BD ( 1) C 35 - C 40 | /643. BD* ( 1) C 40 - C 41 | 1.38 | 1.29 | 0.054 |
| 52. BD ( 1) C 35 - C 40 | /645. BD* ( 1) C 40 - H 54 | 0.34 | 1.09 | 0.024 |
| 52. BD ( 1) C 35 - C 40 | /646. BD* ( 1) C 41 - H 55 | 1.50 | 1.09 | 0.051 |
| 53. BD ( 1) C 36 - C 37 | /372. RY* ( 2) C 34        | 0.76 | 2.10 | 0.051 |
| 53. BD ( 1) C 36 - C 37 | /380. RY* ( 2) C 35        | 0.74 | 2.28 | 0.052 |
| 53. BD ( 1) C 36 - C 37 | /435. RY* ( 1) N 42        | 0.60 | 2.01 | 0.044 |
| 53. BD ( 1) C 36 - C 37 | /630. BD* ( 1) C 34 - C 36 | 1.38 | 1.23 | 0.052 |
| 53. BD ( 1) C 36 - C 37 | /631. BD* ( 1) C 34 - H 51 | 0.65 | 1.20 | 0.035 |
| 53. BD ( 1) C 36 - C 37 | /632. BD* ( 1) C 35 - C 37 | 2.05 | 1.21 | 0.063 |
| 53. BD ( 1) C 36 - C 37 | /633. BD* ( 1) C 35 - C 40 | 1.13 | 1.21 | 0.047 |
| 53. BD ( 1) C 36 - C 37 | /636. BD* ( 1) C 36 - H 61 | 1.01 | 1.21 | 0.044 |
| 53. BD ( 1) C 36 - C 37 | /637. BD* ( 1) C 37 - N 42 | 1.00 | 1.13 | 0.043 |
| 53. BD ( 1) C 36 - C 37 | /647. BD* ( 1) N 42 - N 43 | 0.74 | 1.25 | 0.038 |
| 54. BD ( 2) C 36 - C 37 | /373. RY* ( 3) C 34        | 0.60 | 0.79 | 0.029 |
| 54. BD ( 2) C 36 - C 37 | /382. RY* ( 4) C 35        | 0.44 | 0.90 | 0.026 |
| 54. BD ( 2) C 36 - C 37 | /625. BD* ( 2) C 32 - C 34 | 6.50 | 0.32 | 0.058 |
| 54. BD ( 2) C 36 - C 37 | /628. BD* ( 2) C 33 - C 35 | 5.74 | 0.32 | 0.057 |
| 54. BD ( 2) C 36 - C 37 | /647. BD* ( 1) N 42 - N 43 | 1.72 | 0.78 | 0.048 |
| 55. BD ( 1) C 36 - H 61 | /371. RY* ( 1) C 34        | 0.49 | 1.84 | 0.038 |
| 55. BD ( 1) C 36 - H 61 | /395. RY* ( 1) C 37        | 0.69 | 1.65 | 0.043 |
| 55. BD ( 1) C 36 - H 61 | /396. RY* ( 2) C 37        | 0.39 | 1.63 | 0.032 |
| 55. BD ( 1) C 36 - H 61 | /624. BD* ( 1) C 32 - C 34 | 1.33 | 1.15 | 0.049 |
| 55. BD ( 1) C 36 - H 61 | /632. BD* ( 1) C 35 - C 37 | 3.21 | 0.97 | 0.071 |
| 55. BD ( 1) C 36 - H 61 | /634. BD* ( 1) C 36 - C 37 | 0.88 | 1.16 | 0.040 |
| 55. BD ( 1) C 36 - H 61 | /637. BD* ( 1) C 37 - N 42 | 0.62 | 0.89 | 0.030 |
| 56. BD ( 1) C 37 - N 42 | /380. RY* ( 2) C 35        | 0.57 | 2.31 | 0.046 |
| 56. BD ( 1) C 37 - N 42 | /387. RY* ( 1) C 36        | 0.55 | 2.16 | 0.044 |
| 56. BD ( 1) C 37 - N 42 | /443. RY* ( 1) N 43        | 0.64 | 1.62 | 0.041 |
| 56. BD ( 1) C 37 - N 42 | /444. RY* ( 2) N 43        | 0.34 | 1.65 | 0.030 |
| 56. BD ( 1) C 37 - N 42 | /627. BD* ( 1) C 33 - C 35 | 0.71 | 1.41 | 0.040 |
| 56. BD ( 1) C 37 - N 42 | /630. BD* ( 1) C 34 - C 36 | 1.22 | 1.25 | 0.049 |
| 56. BD ( 1) C 37 - N 42 | /632. BD* ( 1) C 35 - C 37 | 0.62 | 1.24 | 0.035 |
| 56. BD ( 1) C 37 - N 42 | /634. BD* ( 1) C 36 - C 37 | 1.09 | 1.42 | 0.050 |
| 56. BD ( 1) C 37 - N 42 | /647. BD* ( 1) N 42 - N 43 | 0.68 | 1.28 | 0.037 |
| 56. BD ( 1) C 37 - N 42 | /648. BD* ( 1) N 43 - C 44 | 2.77 | 1.15 | 0.072 |
| 57. BD ( 1) C 38 - C 39 | /363. RY* ( 1) C 33        | 0.57 | 2.39 | 0.047 |
| 57. BD ( 1) C 38 - C 39 | /364. RY* ( 2) C 33        | 0.39 | 2.17 | 0.037 |
| 57. BD ( 1) C 38 - C 39 | /427. RY* ( 1) C 41        | 0.48 | 1.94 | 0.038 |
| 57. BD ( 1) C 38 - C 39 | /428. RY* ( 2) C 41        | 0.42 | 2.07 | 0.037 |
| 57. BD ( 1) C 38 - C 39 | /623. BD* ( 1) C 32 - C 33 | 1.34 | 1.17 | 0.050 |
| 57. BD ( 1) C 38 - C 39 | /629. BD* ( 1) C 33 - C 38 | 1.49 | 1.19 | 0.053 |
| 57. BD ( 1) C 38 - C 39 | /640. BD* ( 1) C 38 - H 52 | 0.88 | 1.19 | 0.041 |
| 57. BD ( 1) C 38 - C 39 | /641. BD* ( 1) C 39 - C 41 | 1.19 | 1.22 | 0.048 |
| 57. BD ( 1) C 38 - C 39 | /642. BD* ( 1) C 39 - H 53 | 0.80 | 1.19 | 0.039 |
| 57. BD ( 1) C 38 - C 39 | /646. BD* ( 1) C 41 - H 55 | 0.78 | 1.20 | 0.039 |
| 58. BD ( 2) C 38 - C 39 | /366. RY* ( 4) C 33        | 0.35 | 0.88 | 0.023 |
| 58. BD ( 2) C 38 - C 39 | /429. RY* ( 3) C 41        | 0.47 | 0.79 | 0.026 |

|                         |                            |      |      |       |
|-------------------------|----------------------------|------|------|-------|
| 58. BD ( 2) C 38 - C 39 | /628. BD* ( 2) C 33 - C 35 | 6.26 | 0.31 | 0.058 |
| 58. BD ( 2) C 38 - C 39 | /644. BD* ( 2) C 40 - C 41 | 6.24 | 0.32 | 0.056 |
| 59. BD ( 1) C 38 - H 52 | /363. RY* ( 1) C 33        | 0.70 | 2.17 | 0.050 |
| 59. BD ( 1) C 38 - H 52 | /411. RY* ( 1) C 39        | 0.67 | 1.71 | 0.043 |
| 59. BD ( 1) C 38 - H 52 | /627. BD* ( 1) C 33 - C 35 | 1.61 | 1.14 | 0.054 |
| 59. BD ( 1) C 38 - H 52 | /638. BD* ( 1) C 38 - C 39 | 0.75 | 1.17 | 0.038 |
| 59. BD ( 1) C 38 - H 52 | /641. BD* ( 1) C 39 - C 41 | 2.73 | 0.99 | 0.066 |
| 59. BD ( 1) C 38 - H 52 | /642. BD* ( 1) C 39 - H 53 | 0.48 | 0.97 | 0.027 |
| 60. BD ( 1) C 39 - C 41 | /404. RY* ( 2) C 38        | 0.92 | 1.77 | 0.051 |
| 60. BD ( 1) C 39 - C 41 | /420. RY* ( 2) C 40        | 0.89 | 1.73 | 0.050 |
| 60. BD ( 1) C 39 - C 41 | /638. BD* ( 1) C 38 - C 39 | 1.32 | 1.29 | 0.052 |
| 60. BD ( 1) C 39 - C 41 | /640. BD* ( 1) C 38 - H 52 | 1.57 | 1.08 | 0.052 |
| 60. BD ( 1) C 39 - C 41 | /642. BD* ( 1) C 39 - H 53 | 0.30 | 1.09 | 0.023 |
| 60. BD ( 1) C 39 - C 41 | /643. BD* ( 1) C 40 - C 41 | 1.35 | 1.30 | 0.053 |
| 60. BD ( 1) C 39 - C 41 | /645. BD* ( 1) C 40 - H 54 | 1.62 | 1.10 | 0.053 |
| 60. BD ( 1) C 39 - C 41 | /646. BD* ( 1) C 41 - H 55 | 0.29 | 1.09 | 0.023 |
| 61. BD ( 1) C 39 - H 53 | /403. RY* ( 1) C 38        | 0.74 | 1.71 | 0.045 |
| 61. BD ( 1) C 39 - H 53 | /427. RY* ( 1) C 41        | 0.62 | 1.70 | 0.041 |
| 61. BD ( 1) C 39 - H 53 | /629. BD* ( 1) C 33 - C 38 | 3.15 | 0.95 | 0.069 |
| 61. BD ( 1) C 39 - H 53 | /638. BD* ( 1) C 38 - C 39 | 0.71 | 1.16 | 0.036 |
| 61. BD ( 1) C 39 - H 53 | /640. BD* ( 1) C 38 - H 52 | 0.54 | 0.95 | 0.029 |
| 61. BD ( 1) C 39 - H 53 | /643. BD* ( 1) C 40 - C 41 | 1.39 | 1.17 | 0.051 |
| 62. BD ( 1) C 40 - C 41 | /379. RY* ( 1) C 35        | 0.76 | 2.29 | 0.053 |
| 62. BD ( 1) C 40 - C 41 | /380. RY* ( 2) C 35        | 0.27 | 2.27 | 0.031 |
| 62. BD ( 1) C 40 - C 41 | /411. RY* ( 1) C 39        | 0.44 | 1.93 | 0.037 |
| 62. BD ( 1) C 40 - C 41 | /412. RY* ( 2) C 39        | 0.42 | 2.05 | 0.037 |
| 62. BD ( 1) C 40 - C 41 | /632. BD* ( 1) C 35 - C 37 | 1.26 | 1.19 | 0.049 |
| 62. BD ( 1) C 40 - C 41 | /633. BD* ( 1) C 35 - C 40 | 1.44 | 1.20 | 0.053 |
| 62. BD ( 1) C 40 - C 41 | /641. BD* ( 1) C 39 - C 41 | 1.24 | 1.21 | 0.049 |
| 62. BD ( 1) C 40 - C 41 | /642. BD* ( 1) C 39 - H 53 | 0.78 | 1.19 | 0.039 |
| 62. BD ( 1) C 40 - C 41 | /645. BD* ( 1) C 40 - H 54 | 0.87 | 1.20 | 0.041 |
| 62. BD ( 1) C 40 - C 41 | /646. BD* ( 1) C 41 - H 55 | 0.84 | 1.19 | 0.040 |
| 63. BD ( 2) C 40 - C 41 | /382. RY* ( 4) C 35        | 0.34 | 0.88 | 0.023 |
| 63. BD ( 2) C 40 - C 41 | /413. RY* ( 3) C 39        | 0.49 | 0.78 | 0.026 |
| 63. BD ( 2) C 40 - C 41 | /628. BD* ( 2) C 33 - C 35 | 6.44 | 0.31 | 0.058 |
| 63. BD ( 2) C 40 - C 41 | /639. BD* ( 2) C 38 - C 39 | 7.19 | 0.31 | 0.060 |
| 64. BD ( 1) C 40 - H 54 | /379. RY* ( 1) C 35        | 0.69 | 2.05 | 0.048 |
| 64. BD ( 1) C 40 - H 54 | /427. RY* ( 1) C 41        | 0.60 | 1.70 | 0.040 |
| 64. BD ( 1) C 40 - H 54 | /627. BD* ( 1) C 33 - C 35 | 1.74 | 1.13 | 0.056 |
| 64. BD ( 1) C 40 - H 54 | /641. BD* ( 1) C 39 - C 41 | 2.76 | 0.98 | 0.066 |
| 64. BD ( 1) C 40 - H 54 | /643. BD* ( 1) C 40 - C 41 | 0.80 | 1.16 | 0.038 |
| 64. BD ( 1) C 40 - H 54 | /646. BD* ( 1) C 41 - H 55 | 0.50 | 0.96 | 0.028 |
| 65. BD ( 1) C 41 - H 55 | /411. RY* ( 1) C 39        | 0.60 | 1.69 | 0.040 |
| 65. BD ( 1) C 41 - H 55 | /419. RY* ( 1) C 40        | 0.76 | 1.71 | 0.046 |
| 65. BD ( 1) C 41 - H 55 | /633. BD* ( 1) C 35 - C 40 | 3.15 | 0.96 | 0.070 |
| 65. BD ( 1) C 41 - H 55 | /638. BD* ( 1) C 38 - C 39 | 1.41 | 1.15 | 0.051 |
| 65. BD ( 1) C 41 - H 55 | /643. BD* ( 1) C 40 - C 41 | 0.76 | 1.16 | 0.038 |
| 65. BD ( 1) C 41 - H 55 | /645. BD* ( 1) C 40 - H 54 | 0.49 | 0.96 | 0.028 |
| 66. BD ( 1) N 42 - N 43 | /395. RY* ( 1) C 37        | 0.58 | 2.11 | 0.044 |
| 66. BD ( 1) N 42 - N 43 | /437. RY* ( 3) N 42        | 0.32 | 2.26 | 0.034 |
| 66. BD ( 1) N 42 - N 43 | /451. RY* ( 1) C 44        | 0.51 | 2.12 | 0.042 |
| 66. BD ( 1) N 42 - N 43 | /452. RY* ( 2) C 44        | 1.03 | 2.36 | 0.062 |
| 66. BD ( 1) N 42 - N 43 | /634. BD* ( 1) C 36 - C 37 | 0.39 | 1.62 | 0.032 |
| 66. BD ( 1) N 42 - N 43 | /635. BD* ( 2) C 36 - C 37 | 0.38 | 1.01 | 0.026 |
| 66. BD ( 1) N 42 - N 43 | /637. BD* ( 1) C 37 - N 42 | 0.67 | 1.35 | 0.038 |
| 66. BD ( 1) N 42 - N 43 | /648. BD* ( 1) N 43 - C 44 | 0.25 | 1.35 | 0.023 |
| 66. BD ( 1) N 42 - N 43 | /649. BD* ( 1) C 44 - C 45 | 0.60 | 1.42 | 0.037 |
| 67. BD ( 1) N 43 - C 44 | /435. RY* ( 1) N 42        | 0.28 | 2.03 | 0.030 |
| 67. BD ( 1) N 43 - C 44 | /436. RY* ( 2) N 42        | 0.73 | 2.34 | 0.052 |
| 67. BD ( 1) N 43 - C 44 | /437. RY* ( 3) N 42        | 0.57 | 2.06 | 0.043 |
| 67. BD ( 1) N 43 - C 44 | /459. RY* ( 1) C 45        | 0.42 | 2.05 | 0.037 |
| 67. BD ( 1) N 43 - C 44 | /467. RY* ( 1) C 46        | 0.46 | 1.94 | 0.038 |
| 67. BD ( 1) N 43 - C 44 | /637. BD* ( 1) C 37 - N 42 | 2.52 | 1.15 | 0.068 |
| 67. BD ( 1) N 43 - C 44 | /649. BD* ( 1) C 44 - C 45 | 0.37 | 1.22 | 0.027 |
| 67. BD ( 1) N 43 - C 44 | /650. BD* ( 1) C 44 - C 46 | 0.97 | 1.37 | 0.046 |
| 67. BD ( 1) N 43 - C 44 | /652. BD* ( 1) C 45 - C 47 | 0.48 | 1.41 | 0.033 |
| 67. BD ( 1) N 43 - C 44 | /655. BD* ( 1) C 46 - C 48 | 1.41 | 1.22 | 0.052 |
| 68. BD ( 1) C 44 - C 45 | /443. RY* ( 1) N 43        | 0.34 | 1.50 | 0.029 |
| 68. BD ( 1) C 44 - C 45 | /470. RY* ( 4) C 46        | 0.36 | 1.68 | 0.031 |
| 68. BD ( 1) C 44 - C 45 | /475. RY* ( 1) C 47        | 0.42 | 1.85 | 0.035 |
| 68. BD ( 1) C 44 - C 45 | /476. RY* ( 2) C 47        | 0.71 | 1.99 | 0.048 |

|                         |                            |      |      |       |
|-------------------------|----------------------------|------|------|-------|
| 68. BD ( 1) C 44 - C 45 | /647. BD* ( 1) N 42 - N 43 | 1.50 | 1.16 | 0.053 |
| 68. BD ( 1) C 44 - C 45 | /648. BD* ( 1) N 43 - C 44 | 0.52 | 1.03 | 0.029 |
| 68. BD ( 1) C 44 - C 45 | /650. BD* ( 1) C 44 - C 46 | 1.77 | 1.25 | 0.060 |
| 68. BD ( 1) C 44 - C 45 | /652. BD* ( 1) C 45 - C 47 | 1.16 | 1.30 | 0.049 |
| 68. BD ( 1) C 44 - C 45 | /654. BD* ( 1) C 45 - H 56 | 0.31 | 1.10 | 0.023 |
| 68. BD ( 1) C 44 - C 45 | /656. BD* ( 1) C 46 - O 65 | 2.69 | 0.96 | 0.064 |
| 68. BD ( 1) C 44 - C 45 | /658. BD* ( 1) C 47 - H 57 | 1.37 | 1.11 | 0.049 |
| 69. BD ( 1) C 44 - C 46 | /445. RY* ( 3) N 43        | 0.30 | 1.86 | 0.030 |
| 69. BD ( 1) C 44 - C 46 | /459. RY* ( 1) C 45        | 0.53 | 2.06 | 0.042 |
| 69. BD ( 1) C 44 - C 46 | /483. RY* ( 1) C 48        | 0.65 | 2.07 | 0.047 |
| 69. BD ( 1) C 44 - C 46 | /648. BD* ( 1) N 43 - C 44 | 0.63 | 1.15 | 0.034 |
| 69. BD ( 1) C 44 - C 46 | /649. BD* ( 1) C 44 - C 45 | 1.71 | 1.22 | 0.058 |
| 69. BD ( 1) C 44 - C 46 | /654. BD* ( 1) C 45 - H 56 | 0.63 | 1.22 | 0.035 |
| 69. BD ( 1) C 44 - C 46 | /655. BD* ( 1) C 46 - C 48 | 1.70 | 1.22 | 0.058 |
| 69. BD ( 1) C 44 - C 46 | /656. BD* ( 1) C 46 - O 65 | 0.35 | 1.08 | 0.025 |
| 69. BD ( 1) C 44 - C 46 | /661. BD* ( 1) C 48 - H 58 | 0.61 | 1.23 | 0.035 |
| 70. BD ( 2) C 44 - C 46 | /444. RY* ( 2) N 43        | 0.36 | 1.17 | 0.027 |
| 70. BD ( 2) C 44 - C 46 | /461. RY* ( 3) C 45        | 0.52 | 0.86 | 0.028 |
| 70. BD ( 2) C 44 - C 46 | /485. RY* ( 3) C 48        | 0.27 | 1.08 | 0.023 |
| 70. BD ( 2) C 44 - C 46 | /653. BD* ( 2) C 45 - C 47 | 5.90 | 0.34 | 0.056 |
| 70. BD ( 2) C 44 - C 46 | /660. BD* ( 2) C 48 - C 49 | 6.90 | 0.34 | 0.062 |
| 71. BD ( 1) C 45 - C 47 | /452. RY* ( 2) C 44        | 0.87 | 2.14 | 0.054 |
| 71. BD ( 1) C 45 - C 47 | /491. RY* ( 1) C 49        | 0.52 | 1.96 | 0.041 |
| 71. BD ( 1) C 45 - C 47 | /492. RY* ( 2) C 49        | 0.40 | 2.10 | 0.037 |
| 71. BD ( 1) C 45 - C 47 | /648. BD* ( 1) N 43 - C 44 | 1.34 | 1.12 | 0.049 |
| 71. BD ( 1) C 45 - C 47 | /649. BD* ( 1) C 44 - C 45 | 1.11 | 1.19 | 0.046 |
| 71. BD ( 1) C 45 - C 47 | /654. BD* ( 1) C 45 - H 56 | 0.85 | 1.20 | 0.040 |
| 71. BD ( 1) C 45 - C 47 | /657. BD* ( 1) C 47 - C 49 | 1.04 | 1.21 | 0.045 |
| 71. BD ( 1) C 45 - C 47 | /658. BD* ( 1) C 47 - H 57 | 0.70 | 1.20 | 0.037 |
| 71. BD ( 1) C 45 - C 47 | /662. BD* ( 1) C 49 - H 59 | 0.80 | 1.20 | 0.039 |
| 72. BD ( 2) C 45 - C 47 | /493. RY* ( 3) C 49        | 0.54 | 0.79 | 0.027 |
| 72. BD ( 2) C 45 - C 47 | /651. BD* ( 2) C 44 - C 46 | 6.18 | 0.29 | 0.057 |
| 72. BD ( 2) C 45 - C 47 | /660. BD* ( 2) C 48 - C 49 | 6.05 | 0.32 | 0.057 |
| 73. BD ( 1) C 45 - H 56 | /451. RY* ( 1) C 44        | 0.44 | 1.65 | 0.034 |
| 73. BD ( 1) C 45 - H 56 | /475. RY* ( 1) C 47        | 0.61 | 1.71 | 0.041 |
| 73. BD ( 1) C 45 - H 56 | /648. BD* ( 1) N 43 - C 44 | 0.31 | 0.88 | 0.021 |
| 73. BD ( 1) C 45 - H 56 | /650. BD* ( 1) C 44 - C 46 | 1.67 | 1.11 | 0.055 |
| 73. BD ( 1) C 45 - H 56 | /652. BD* ( 1) C 45 - C 47 | 0.74 | 1.15 | 0.037 |
| 73. BD ( 1) C 45 - H 56 | /657. BD* ( 1) C 47 - C 49 | 2.68 | 0.97 | 0.064 |
| 73. BD ( 1) C 45 - H 56 | /658. BD* ( 1) C 47 - H 57 | 0.50 | 0.96 | 0.028 |
| 74. BD ( 1) C 46 - C 48 | /451. RY* ( 1) C 44        | 0.49 | 1.80 | 0.038 |
| 74. BD ( 1) C 46 - C 48 | /491. RY* ( 1) C 49        | 0.35 | 1.87 | 0.032 |
| 74. BD ( 1) C 46 - C 48 | /492. RY* ( 2) C 49        | 0.73 | 2.00 | 0.049 |
| 74. BD ( 1) C 46 - C 48 | /648. BD* ( 1) N 43 - C 44 | 2.51 | 1.03 | 0.064 |
| 74. BD ( 1) C 46 - C 48 | /650. BD* ( 1) C 44 - C 46 | 1.89 | 1.25 | 0.062 |
| 74. BD ( 1) C 46 - C 48 | /659. BD* ( 1) C 48 - C 49 | 1.21 | 1.31 | 0.050 |
| 74. BD ( 1) C 46 - C 48 | /661. BD* ( 1) C 48 - H 58 | 0.29 | 1.11 | 0.023 |
| 74. BD ( 1) C 46 - C 48 | /662. BD* ( 1) C 49 - H 59 | 1.48 | 1.11 | 0.051 |
| 75. BD ( 1) C 46 - O 65 | /451. RY* ( 1) C 44        | 0.38 | 2.01 | 0.035 |
| 75. BD ( 1) C 46 - O 65 | /467. RY* ( 1) C 46        | 0.51 | 2.03 | 0.041 |
| 75. BD ( 1) C 46 - O 65 | /483. RY* ( 1) C 48        | 0.27 | 2.16 | 0.031 |
| 75. BD ( 1) C 46 - O 65 | /649. BD* ( 1) C 44 - C 45 | 1.26 | 1.31 | 0.051 |
| 75. BD ( 1) C 46 - O 65 | /650. BD* ( 1) C 44 - C 46 | 0.68 | 1.46 | 0.040 |
| 75. BD ( 1) C 46 - O 65 | /655. BD* ( 1) C 46 - C 48 | 0.30 | 1.31 | 0.025 |
| 75. BD ( 1) C 46 - O 65 | /659. BD* ( 1) C 48 - C 49 | 0.48 | 1.52 | 0.034 |
| 76. BD ( 1) C 47 - C 49 | /460. RY* ( 2) C 45        | 1.00 | 1.83 | 0.054 |
| 76. BD ( 1) C 47 - C 49 | /483. RY* ( 1) C 48        | 0.26 | 1.94 | 0.028 |
| 76. BD ( 1) C 47 - C 49 | /484. RY* ( 2) C 48        | 0.93 | 1.82 | 0.052 |
| 76. BD ( 1) C 47 - C 49 | /652. BD* ( 1) C 45 - C 47 | 1.11 | 1.29 | 0.048 |
| 76. BD ( 1) C 47 - C 49 | /654. BD* ( 1) C 45 - H 56 | 1.63 | 1.09 | 0.053 |
| 76. BD ( 1) C 47 - C 49 | /658. BD* ( 1) C 47 - H 57 | 0.26 | 1.10 | 0.021 |
| 76. BD ( 1) C 47 - C 49 | /659. BD* ( 1) C 48 - C 49 | 1.18 | 1.30 | 0.049 |
| 76. BD ( 1) C 47 - C 49 | /661. BD* ( 1) C 48 - H 58 | 1.62 | 1.10 | 0.053 |
| 76. BD ( 1) C 47 - C 49 | /662. BD* ( 1) C 49 - H 59 | 0.28 | 1.10 | 0.022 |
| 77. BD ( 1) C 47 - H 57 | /459. RY* ( 1) C 45        | 0.80 | 1.79 | 0.048 |
| 77. BD ( 1) C 47 - H 57 | /491. RY* ( 1) C 49        | 0.60 | 1.73 | 0.041 |
| 77. BD ( 1) C 47 - H 57 | /649. BD* ( 1) C 44 - C 45 | 3.09 | 0.96 | 0.069 |
| 77. BD ( 1) C 47 - H 57 | /652. BD* ( 1) C 45 - C 47 | 0.63 | 1.16 | 0.034 |
| 77. BD ( 1) C 47 - H 57 | /654. BD* ( 1) C 45 - H 56 | 0.52 | 0.96 | 0.028 |
| 77. BD ( 1) C 47 - H 57 | /659. BD* ( 1) C 48 - C 49 | 1.37 | 1.17 | 0.051 |
| 78. BD ( 1) C 48 - C 49 | /467. RY* ( 1) C 46        | 0.46 | 1.91 | 0.038 |

|                         |                            |      |       |       |
|-------------------------|----------------------------|------|-------|-------|
| 78. BD ( 1) C 48 - C 49 | /468. RY* ( 2) C 46        | 0.53 | 2.15  | 0.043 |
| 78. BD ( 1) C 48 - C 49 | /475. RY* ( 1) C 47        | 0.50 | 1.94  | 0.039 |
| 78. BD ( 1) C 48 - C 49 | /476. RY* ( 2) C 47        | 0.41 | 2.08  | 0.037 |
| 78. BD ( 1) C 48 - C 49 | /521. RY* ( 1) H 58        | 0.26 | 1.20  | 0.022 |
| 78. BD ( 1) C 48 - C 49 | /655. BD* ( 1) C 46 - C 48 | 0.95 | 1.19  | 0.043 |
| 78. BD ( 1) C 48 - C 49 | /656. BD* ( 1) C 46 - O 65 | 1.28 | 1.05  | 0.046 |
| 78. BD ( 1) C 48 - C 49 | /657. BD* ( 1) C 47 - C 49 | 1.10 | 1.21  | 0.046 |
| 78. BD ( 1) C 48 - C 49 | /658. BD* ( 1) C 47 - H 57 | 0.78 | 1.19  | 0.038 |
| 78. BD ( 1) C 48 - C 49 | /661. BD* ( 1) C 48 - H 58 | 0.90 | 1.20  | 0.041 |
| 78. BD ( 1) C 48 - C 49 | /662. BD* ( 1) C 49 - H 59 | 0.80 | 1.20  | 0.039 |
| 79. BD ( 2) C 48 - C 49 | /477. RY* ( 3) C 47        | 0.49 | 0.79  | 0.026 |
| 79. BD ( 2) C 48 - C 49 | /651. BD* ( 2) C 44 - C 46 | 5.73 | 0.28  | 0.054 |
| 79. BD ( 2) C 48 - C 49 | /653. BD* ( 2) C 45 - C 47 | 7.18 | 0.30  | 0.060 |
| 80. BD ( 1) C 48 - H 58 | /467. RY* ( 1) C 46        | 0.36 | 1.68  | 0.031 |
| 80. BD ( 1) C 48 - H 58 | /491. RY* ( 1) C 49        | 0.59 | 1.72  | 0.040 |
| 80. BD ( 1) C 48 - H 58 | /650. BD* ( 1) C 44 - C 46 | 1.57 | 1.11  | 0.053 |
| 80. BD ( 1) C 48 - H 58 | /656. BD* ( 1) C 46 - O 65 | 0.47 | 0.81  | 0.025 |
| 80. BD ( 1) C 48 - H 58 | /657. BD* ( 1) C 47 - C 49 | 2.76 | 0.97  | 0.065 |
| 80. BD ( 1) C 48 - H 58 | /659. BD* ( 1) C 48 - C 49 | 0.82 | 1.16  | 0.039 |
| 80. BD ( 1) C 48 - H 58 | /662. BD* ( 1) C 49 - H 59 | 0.49 | 0.96  | 0.027 |
| 81. BD ( 1) C 49 - H 59 | /475. RY* ( 1) C 47        | 0.57 | 1.70  | 0.040 |
| 81. BD ( 1) C 49 - H 59 | /483. RY* ( 1) C 48        | 0.80 | 1.80  | 0.048 |
| 81. BD ( 1) C 49 - H 59 | /652. BD* ( 1) C 45 - C 47 | 1.35 | 1.15  | 0.050 |
| 81. BD ( 1) C 49 - H 59 | /655. BD* ( 1) C 46 - C 48 | 2.98 | 0.95  | 0.067 |
| 81. BD ( 1) C 49 - H 59 | /659. BD* ( 1) C 48 - C 49 | 0.74 | 1.16  | 0.037 |
| 81. BD ( 1) C 49 - H 59 | /661. BD* ( 1) C 48 - H 58 | 0.47 | 0.96  | 0.027 |
| 82. BD ( 1) O 50 - H 60 | /355. RY* ( 1) C 32        | 1.34 | 1.80  | 0.062 |
| 82. BD ( 1) O 50 - H 60 | /624. BD* ( 1) C 32 - C 34 | 1.72 | 1.34  | 0.061 |
| 105. CR ( 1) C 32       | /363. RY* ( 1) C 33        | 0.63 | 11.77 | 0.108 |
| 105. CR ( 1) C 32       | /372. RY* ( 2) C 34        | 1.14 | 11.47 | 0.145 |
| 105. CR ( 1) C 32       | /624. BD* ( 1) C 32 - C 34 | 1.03 | 10.75 | 0.133 |
| 105. CR ( 1) C 32       | /626. BD* ( 1) C 32 - O 50 | 0.66 | 10.40 | 0.105 |
| 105. CR ( 1) C 32       | /627. BD* ( 1) C 33 - C 35 | 0.31 | 10.75 | 0.073 |
| 105. CR ( 1) C 32       | /629. BD* ( 1) C 33 - C 38 | 0.34 | 10.57 | 0.076 |
| 105. CR ( 1) C 32       | /630. BD* ( 1) C 34 - C 36 | 0.49 | 10.60 | 0.092 |
| 106. CR ( 1) C 33       | /355. RY* ( 1) C 32        | 0.50 | 11.15 | 0.095 |
| 106. CR ( 1) C 33       | /379. RY* ( 1) C 35        | 0.32 | 11.61 | 0.077 |
| 106. CR ( 1) C 33       | /380. RY* ( 2) C 35        | 1.04 | 11.59 | 0.138 |
| 106. CR ( 1) C 33       | /404. RY* ( 2) C 38        | 0.51 | 11.19 | 0.095 |
| 106. CR ( 1) C 33       | /624. BD* ( 1) C 32 - C 34 | 0.30 | 10.69 | 0.072 |
| 106. CR ( 1) C 33       | /626. BD* ( 1) C 32 - O 50 | 0.26 | 10.34 | 0.066 |
| 106. CR ( 1) C 33       | /627. BD* ( 1) C 33 - C 35 | 0.66 | 10.69 | 0.106 |
| 106. CR ( 1) C 33       | /632. BD* ( 1) C 35 - C 37 | 0.58 | 10.52 | 0.100 |
| 106. CR ( 1) C 33       | /633. BD* ( 1) C 35 - C 40 | 0.52 | 10.52 | 0.094 |
| 106. CR ( 1) C 33       | /638. BD* ( 1) C 38 - C 39 | 0.27 | 10.71 | 0.068 |
| 107. CR ( 1) C 34       | /356. RY* ( 2) C 32        | 1.65 | 11.46 | 0.174 |
| 107. CR ( 1) C 34       | /508. RY* ( 2) H 51        | 0.29 | 12.29 | 0.076 |
| 107. CR ( 1) C 34       | /623. BD* ( 1) C 32 - C 33 | 0.67 | 10.46 | 0.107 |
| 107. CR ( 1) C 34       | /624. BD* ( 1) C 32 - C 34 | 0.34 | 10.66 | 0.076 |
| 107. CR ( 1) C 34       | /626. BD* ( 1) C 32 - O 50 | 0.40 | 10.31 | 0.081 |
| 107. CR ( 1) C 34       | /634. BD* ( 1) C 36 - C 37 | 0.36 | 10.67 | 0.079 |
| 108. CR ( 1) C 35       | /364. RY* ( 2) C 33        | 1.17 | 11.48 | 0.146 |
| 108. CR ( 1) C 35       | /396. RY* ( 2) C 37        | 0.42 | 11.16 | 0.086 |
| 108. CR ( 1) C 35       | /397. RY* ( 3) C 37        | 0.41 | 11.12 | 0.085 |
| 108. CR ( 1) C 35       | /420. RY* ( 2) C 40        | 0.57 | 11.15 | 0.101 |
| 108. CR ( 1) C 35       | /623. BD* ( 1) C 32 - C 33 | 0.56 | 10.48 | 0.098 |
| 108. CR ( 1) C 35       | /627. BD* ( 1) C 33 - C 35 | 0.58 | 10.68 | 0.100 |
| 108. CR ( 1) C 35       | /629. BD* ( 1) C 33 - C 38 | 0.51 | 10.50 | 0.093 |
| 108. CR ( 1) C 35       | /634. BD* ( 1) C 36 - C 37 | 0.35 | 10.70 | 0.078 |
| 108. CR ( 1) C 35       | /637. BD* ( 1) C 37 - N 42 | 0.27 | 10.43 | 0.067 |
| 108. CR ( 1) C 35       | /643. BD* ( 1) C 40 - C 41 | 0.28 | 10.72 | 0.070 |
| 109. CR ( 1) C 36       | /372. RY* ( 2) C 34        | 0.26 | 11.38 | 0.069 |
| 109. CR ( 1) C 36       | /395. RY* ( 1) C 37        | 0.32 | 11.17 | 0.075 |
| 109. CR ( 1) C 36       | /397. RY* ( 3) C 37        | 1.23 | 11.11 | 0.148 |
| 109. CR ( 1) C 36       | /398. RY* ( 4) C 37        | 0.33 | 10.99 | 0.077 |
| 109. CR ( 1) C 36       | /624. BD* ( 1) C 32 - C 34 | 0.33 | 10.67 | 0.075 |
| 109. CR ( 1) C 36       | /632. BD* ( 1) C 35 - C 37 | 0.67 | 10.49 | 0.107 |
| 109. CR ( 1) C 36       | /634. BD* ( 1) C 36 - C 37 | 0.47 | 10.68 | 0.090 |
| 109. CR ( 1) C 36       | /637. BD* ( 1) C 37 - N 42 | 0.51 | 10.41 | 0.093 |
| 110. CR ( 1) C 37       | /379. RY* ( 1) C 35        | 0.66 | 11.63 | 0.111 |
| 110. CR ( 1) C 37       | /388. RY* ( 2) C 36        | 1.01 | 11.20 | 0.134 |

|      |    |   |    |   |    |       |     |   |    |   |        |    |      |       |       |
|------|----|---|----|---|----|-------|-----|---|----|---|--------|----|------|-------|-------|
| 110. | CR | ( | 1) | C | 37 | /627. | BD* | ( | 1) | C | 33 - C | 35 | 0.36 | 10.71 | 0.079 |
| 110. | CR | ( | 1) | C | 37 | /630. | BD* | ( | 1) | C | 34 - C | 36 | 0.49 | 10.55 | 0.091 |
| 110. | CR | ( | 1) | C | 37 | /633. | BD* | ( | 1) | C | 35 - C | 40 | 0.33 | 10.54 | 0.075 |
| 110. | CR | ( | 1) | C | 37 | /634. | BD* | ( | 1) | C | 36 - C | 37 | 0.75 | 10.72 | 0.114 |
| 110. | CR | ( | 1) | C | 37 | /636. | BD* | ( | 1) | C | 36 - H | 61 | 0.27 | 10.54 | 0.067 |
| 110. | CR | ( | 1) | C | 37 | /647. | BD* | ( | 1) | N | 42 - N | 43 | 0.40 | 10.58 | 0.083 |
| 111. | CR | ( | 1) | C | 38 | /363. | RY* | ( | 1) | C | 33     |    | 0.25 | 11.69 | 0.069 |
| 111. | CR | ( | 1) | C | 38 | /364. | RY* | ( | 2) | C | 33     |    | 0.34 | 11.47 | 0.079 |
| 111. | CR | ( | 1) | C | 38 | /412. | RY* | ( | 2) | C | 39     |    | 1.15 | 11.35 | 0.144 |
| 111. | CR | ( | 1) | C | 38 | /510. | RY* | ( | 2) | H | 52     |    | 0.27 | 12.26 | 0.073 |
| 111. | CR | ( | 1) | C | 38 | /623. | BD* | ( | 1) | C | 32 - C | 33 | 0.34 | 10.46 | 0.077 |
| 111. | CR | ( | 1) | C | 38 | /627. | BD* | ( | 1) | C | 33 - C | 35 | 0.37 | 10.66 | 0.079 |
| 111. | CR | ( | 1) | C | 38 | /638. | BD* | ( | 1) | C | 38 - C | 39 | 0.44 | 10.69 | 0.087 |
| 111. | CR | ( | 1) | C | 38 | /641. | BD* | ( | 1) | C | 39 - C | 41 | 0.53 | 10.51 | 0.095 |
| 112. | CR | ( | 1) | C | 39 | /403. | RY* | ( | 1) | C | 38     |    | 0.37 | 11.23 | 0.082 |
| 112. | CR | ( | 1) | C | 39 | /404. | RY* | ( | 2) | C | 38     |    | 0.63 | 11.16 | 0.106 |
| 112. | CR | ( | 1) | C | 39 | /406. | RY* | ( | 4) | C | 38     |    | 0.40 | 11.09 | 0.085 |
| 112. | CR | ( | 1) | C | 39 | /428. | RY* | ( | 2) | C | 41     |    | 0.44 | 11.37 | 0.089 |
| 112. | CR | ( | 1) | C | 39 | /512. | RY* | ( | 2) | H | 53     |    | 0.32 | 11.98 | 0.078 |
| 112. | CR | ( | 1) | C | 39 | /629. | BD* | ( | 1) | C | 33 - C | 38 | 0.62 | 10.48 | 0.102 |
| 112. | CR | ( | 1) | C | 39 | /638. | BD* | ( | 1) | C | 38 - C | 39 | 0.38 | 10.68 | 0.081 |
| 112. | CR | ( | 1) | C | 39 | /643. | BD* | ( | 1) | C | 40 - C | 41 | 0.31 | 10.69 | 0.073 |
| 113. | CR | ( | 1) | C | 40 | /380. | RY* | ( | 2) | C | 35     |    | 0.50 | 11.56 | 0.096 |
| 113. | CR | ( | 1) | C | 40 | /428. | RY* | ( | 2) | C | 41     |    | 1.11 | 11.36 | 0.142 |
| 113. | CR | ( | 1) | C | 40 | /514. | RY* | ( | 2) | H | 54     |    | 0.26 | 12.35 | 0.071 |
| 113. | CR | ( | 1) | C | 40 | /627. | BD* | ( | 1) | C | 33 - C | 35 | 0.42 | 10.65 | 0.085 |
| 113. | CR | ( | 1) | C | 40 | /632. | BD* | ( | 1) | C | 35 - C | 37 | 0.34 | 10.48 | 0.077 |
| 113. | CR | ( | 1) | C | 40 | /641. | BD* | ( | 1) | C | 39 - C | 41 | 0.54 | 10.51 | 0.095 |
| 113. | CR | ( | 1) | C | 40 | /643. | BD* | ( | 1) | C | 40 - C | 41 | 0.43 | 10.69 | 0.085 |
| 114. | CR | ( | 1) | C | 41 | /412. | RY* | ( | 2) | C | 39     |    | 0.42 | 11.34 | 0.087 |
| 114. | CR | ( | 1) | C | 41 | /419. | RY* | ( | 1) | C | 40     |    | 0.35 | 11.23 | 0.079 |
| 114. | CR | ( | 1) | C | 41 | /420. | RY* | ( | 2) | C | 40     |    | 0.57 | 11.12 | 0.101 |
| 114. | CR | ( | 1) | C | 41 | /422. | RY* | ( | 4) | C | 40     |    | 0.51 | 11.13 | 0.095 |
| 114. | CR | ( | 1) | C | 41 | /516. | RY* | ( | 2) | H | 55     |    | 0.32 | 11.98 | 0.078 |
| 114. | CR | ( | 1) | C | 41 | /633. | BD* | ( | 1) | C | 35 - C | 40 | 0.61 | 10.49 | 0.102 |
| 114. | CR | ( | 1) | C | 41 | /638. | BD* | ( | 1) | C | 38 - C | 39 | 0.32 | 10.68 | 0.074 |
| 114. | CR | ( | 1) | C | 41 | /643. | BD* | ( | 1) | C | 40 - C | 41 | 0.41 | 10.69 | 0.084 |
| 115. | CR | ( | 1) | N | 42 | /395. | RY* | ( | 1) | C | 37     |    | 0.85 | 15.34 | 0.144 |
| 115. | CR | ( | 1) | N | 42 | /396. | RY* | ( | 2) | C | 37     |    | 0.33 | 15.31 | 0.089 |
| 115. | CR | ( | 1) | N | 42 | /445. | RY* | ( | 3) | N | 43     |    | 0.86 | 15.29 | 0.145 |
| 115. | CR | ( | 1) | N | 42 | /632. | BD* | ( | 1) | C | 35 - C | 37 | 0.29 | 14.66 | 0.084 |
| 115. | CR | ( | 1) | N | 42 | /634. | BD* | ( | 1) | C | 36 - C | 37 | 0.27 | 14.85 | 0.080 |
| 115. | CR | ( | 1) | N | 42 | /648. | BD* | ( | 1) | N | 43 - C | 44 | 0.67 | 14.57 | 0.126 |
| 116. | CR | ( | 1) | N | 43 | /437. | RY* | ( | 3) | N | 42     |    | 1.00 | 15.48 | 0.157 |
| 116. | CR | ( | 1) | N | 43 | /451. | RY* | ( | 1) | C | 44     |    | 0.80 | 15.34 | 0.140 |
| 116. | CR | ( | 1) | N | 43 | /452. | RY* | ( | 2) | C | 44     |    | 0.25 | 15.58 | 0.080 |
| 116. | CR | ( | 1) | N | 43 | /637. | BD* | ( | 1) | C | 37 - N | 42 | 0.63 | 14.58 | 0.122 |
| 116. | CR | ( | 1) | N | 43 | /650. | BD* | ( | 1) | C | 44 - C | 46 | 0.36 | 14.80 | 0.093 |
| 117. | CR | ( | 1) | C | 44 | /460. | RY* | ( | 2) | C | 45     |    | 0.50 | 11.29 | 0.095 |
| 117. | CR | ( | 1) | C | 44 | /467. | RY* | ( | 1) | C | 46     |    | 0.44 | 11.28 | 0.089 |
| 117. | CR | ( | 1) | C | 44 | /468. | RY* | ( | 2) | C | 46     |    | 1.17 | 11.52 | 0.147 |
| 117. | CR | ( | 1) | C | 44 | /647. | BD* | ( | 1) | N | 42 - N | 43 | 0.45 | 10.61 | 0.088 |
| 117. | CR | ( | 1) | C | 44 | /650. | BD* | ( | 1) | C | 44 - C | 46 | 0.61 | 10.71 | 0.103 |
| 117. | CR | ( | 1) | C | 44 | /652. | BD* | ( | 1) | C | 45 - C | 47 | 0.28 | 10.75 | 0.069 |
| 117. | CR | ( | 1) | C | 44 | /655. | BD* | ( | 1) | C | 46 - C | 48 | 0.51 | 10.55 | 0.093 |
| 117. | CR | ( | 1) | C | 44 | /656. | BD* | ( | 1) | C | 46 - O | 65 | 0.40 | 10.41 | 0.083 |
| 118. | CR | ( | 1) | C | 45 | /451. | RY* | ( | 1) | C | 44     |    | 0.31 | 11.19 | 0.075 |
| 118. | CR | ( | 1) | C | 45 | /453. | RY* | ( | 3) | C | 44     |    | 0.31 | 10.95 | 0.073 |
| 118. | CR | ( | 1) | C | 45 | /476. | RY* | ( | 2) | C | 47     |    | 1.02 | 11.37 | 0.136 |
| 118. | CR | ( | 1) | C | 45 | /518. | RY* | ( | 2) | H | 56     |    | 0.31 | 12.30 | 0.078 |
| 118. | CR | ( | 1) | C | 45 | /648. | BD* | ( | 1) | N | 43 - C | 44 | 0.27 | 10.41 | 0.068 |
| 118. | CR | ( | 1) | C | 45 | /650. | BD* | ( | 1) | C | 44 - C | 46 | 0.41 | 10.64 | 0.084 |
| 118. | CR | ( | 1) | C | 45 | /652. | BD* | ( | 1) | C | 45 - C | 47 | 0.41 | 10.68 | 0.084 |
| 118. | CR | ( | 1) | C | 45 | /657. | BD* | ( | 1) | C | 47 - C | 49 | 0.51 | 10.51 | 0.093 |
| 119. | CR | ( | 1) | C | 46 | /452. | RY* | ( | 2) | C | 44     |    | 1.56 | 11.51 | 0.169 |
| 119. | CR | ( | 1) | C | 46 | /484. | RY* | ( | 2) | C | 48     |    | 0.57 | 11.29 | 0.101 |
| 119. | CR | ( | 1) | C | 46 | /648. | BD* | ( | 1) | N | 43 - C | 44 | 0.41 | 10.49 | 0.084 |
| 119. | CR | ( | 1) | C | 46 | /649. | BD* | ( | 1) | C | 44 - C | 45 | 0.49 | 10.56 | 0.091 |
| 119. | CR | ( | 1) | C | 46 | /650. | BD* | ( | 1) | C | 44 - C | 46 | 0.80 | 10.72 | 0.118 |
| 119. | CR | ( | 1) | C | 46 | /656. | BD* | ( | 1) | C | 46 - O | 65 | 0.47 | 10.42 | 0.089 |
| 119. | CR | ( | 1) | C | 46 | /659. | BD* | ( | 1) | C | 48 - C | 49 | 0.29 | 10.77 | 0.071 |

|                           |                            |       |       |       |
|---------------------------|----------------------------|-------|-------|-------|
| 120. CR ( 1) C 47         | /459. RY* ( 1) C 45        | 0.41  | 11.33 | 0.086 |
| 120. CR ( 1) C 47         | /460. RY* ( 2) C 45        | 0.80  | 11.23 | 0.119 |
| 120. CR ( 1) C 47         | /492. RY* ( 2) C 49        | 0.47  | 11.40 | 0.093 |
| 120. CR ( 1) C 47         | /520. RY* ( 2) H 57        | 0.33  | 12.00 | 0.079 |
| 120. CR ( 1) C 47         | /649. BD* ( 1) C 44 - C 45 | 0.56  | 10.49 | 0.097 |
| 120. CR ( 1) C 47         | /652. BD* ( 1) C 45 - C 47 | 0.36  | 10.69 | 0.079 |
| 120. CR ( 1) C 47         | /659. BD* ( 1) C 48 - C 49 | 0.29  | 10.70 | 0.071 |
| 121. CR ( 1) C 48         | /470. RY* ( 4) C 46        | 0.48  | 11.06 | 0.092 |
| 121. CR ( 1) C 48         | /492. RY* ( 2) C 49        | 1.02  | 11.39 | 0.136 |
| 121. CR ( 1) C 48         | /522. RY* ( 2) H 58        | 0.28  | 12.41 | 0.075 |
| 121. CR ( 1) C 48         | /650. BD* ( 1) C 44 - C 46 | 0.43  | 10.64 | 0.086 |
| 121. CR ( 1) C 48         | /657. BD* ( 1) C 47 - C 49 | 0.53  | 10.50 | 0.094 |
| 121. CR ( 1) C 48         | /659. BD* ( 1) C 48 - C 49 | 0.44  | 10.69 | 0.087 |
| 122. CR ( 1) C 49         | /476. RY* ( 2) C 47        | 0.48  | 11.37 | 0.093 |
| 122. CR ( 1) C 49         | /483. RY* ( 1) C 48        | 0.40  | 11.32 | 0.085 |
| 122. CR ( 1) C 49         | /484. RY* ( 2) C 48        | 0.81  | 11.21 | 0.120 |
| 122. CR ( 1) C 49         | /524. RY* ( 2) H 59        | 0.31  | 11.98 | 0.077 |
| 122. CR ( 1) C 49         | /652. BD* ( 1) C 45 - C 47 | 0.29  | 10.68 | 0.071 |
| 122. CR ( 1) C 49         | /655. BD* ( 1) C 46 - C 48 | 0.53  | 10.48 | 0.095 |
| 122. CR ( 1) C 49         | /659. BD* ( 1) C 48 - C 49 | 0.39  | 10.69 | 0.081 |
| 123. CR ( 1) O 50         | /355. RY* ( 1) C 32        | 1.16  | 20.04 | 0.192 |
| 123. CR ( 1) O 50         | /623. BD* ( 1) C 32 - C 33 | 0.28  | 19.38 | 0.094 |
| 125. CR ( 1) O 65         | /467. RY* ( 1) C 46        | 1.38  | 20.11 | 0.211 |
| 125. CR ( 1) O 65         | /650. BD* ( 1) C 44 - C 46 | 0.29  | 19.54 | 0.096 |
| 149. LP ( 1) N 42         | /395. RY* ( 1) C 37        | 0.63  | 1.58  | 0.041 |
| 149. LP ( 1) N 42         | /435. RY* ( 1) N 42        | 0.31  | 1.70  | 0.030 |
| 149. LP ( 1) N 42         | /436. RY* ( 2) N 42        | 0.94  | 2.02  | 0.056 |
| 149. LP ( 1) N 42         | /437. RY* ( 3) N 42        | 0.77  | 1.73  | 0.047 |
| 149. LP ( 1) N 42         | /444. RY* ( 2) N 43        | 0.79  | 1.32  | 0.042 |
| 149. LP ( 1) N 42         | /541. RY* ( 1) O 65        | 0.34  | 2.54  | 0.038 |
| 149. LP ( 1) N 42         | /632. BD* ( 1) C 35 - C 37 | 3.16  | 0.90  | 0.068 |
| 149. LP ( 1) N 42         | /635. BD* ( 2) C 36 - C 37 | 1.25  | 0.49  | 0.033 |
| 150. LP ( 2) N 42         | /397. RY* ( 3) C 37        | 0.31  | 1.40  | 0.027 |
| 150. LP ( 2) N 42         | /443. RY* ( 1) N 43        | 1.13  | 1.17  | 0.047 |
| 150. LP ( 2) N 42         | /444. RY* ( 2) N 43        | 0.39  | 1.20  | 0.028 |
| 150. LP ( 2) N 42         | /632. BD* ( 1) C 35 - C 37 | 1.32  | 0.78  | 0.041 |
| 150. LP ( 2) N 42         | /634. BD* ( 1) C 36 - C 37 | 2.17  | 0.97  | 0.059 |
| 150. LP ( 2) N 42         | /635. BD* ( 2) C 36 - C 37 | 4.66  | 0.37  | 0.054 |
| 151. LP ( 1) N 43         | /436. RY* ( 2) N 42        | 0.37  | 1.96  | 0.034 |
| 151. LP ( 1) N 43         | /437. RY* ( 3) N 42        | 0.47  | 1.68  | 0.036 |
| 151. LP ( 1) N 43         | /451. RY* ( 1) C 44        | 0.93  | 1.53  | 0.048 |
| 151. LP ( 1) N 43         | /649. BD* ( 1) C 44 - C 45 | 0.52  | 0.83  | 0.026 |
| 151. LP ( 1) N 43         | /650. BD* ( 1) C 44 - C 46 | 3.80  | 0.99  | 0.077 |
| 152. LP ( 2) N 43         | /435. RY* ( 1) N 42        | 0.79  | 1.51  | 0.047 |
| 152. LP ( 2) N 43         | /649. BD* ( 1) C 44 - C 45 | 0.29  | 0.70  | 0.019 |
| 152. LP ( 2) N 43         | /651. BD* ( 2) C 44 - C 46 | 18.06 | 0.27  | 0.093 |
| 153. LP ( 1) O 50         | /355. RY* ( 1) C 32        | 1.44  | 1.67  | 0.062 |
| 153. LP ( 1) O 50         | /623. BD* ( 1) C 32 - C 33 | 3.54  | 1.01  | 0.076 |
| 154. LP ( 2) O 50         | /625. BD* ( 2) C 32 - C 34 | 12.11 | 0.35  | 0.086 |
| 157. LP ( 1) O 65         | /467. RY* ( 1) C 46        | 1.13  | 1.77  | 0.057 |
| 157. LP ( 1) O 65         | /650. BD* ( 1) C 44 - C 46 | 3.08  | 1.20  | 0.077 |
| 158. LP ( 2) O 65         | /467. RY* ( 1) C 46        | 0.56  | 1.66  | 0.039 |
| 158. LP ( 2) O 65         | /541. RY* ( 1) O 65        | 0.44  | 2.59  | 0.043 |
| 158. LP ( 2) O 65         | /650. BD* ( 1) C 44 - C 46 | 0.50  | 1.09  | 0.030 |
| 158. LP ( 2) O 65         | /651. BD* ( 2) C 44 - C 46 | 0.69  | 0.51  | 0.026 |
| 158. LP ( 2) O 65         | /655. BD* ( 1) C 46 - C 48 | 3.46  | 0.94  | 0.072 |
| 159. LP ( 3) O 65         | /469. RY* ( 3) C 46        | 0.39  | 1.11  | 0.027 |
| 159. LP ( 3) O 65         | /541. RY* ( 1) O 65        | 0.37  | 2.48  | 0.039 |
| 159. LP ( 3) O 65         | /651. BD* ( 2) C 44 - C 46 | 8.54  | 0.40  | 0.081 |
| 159. LP ( 3) O 65         | /655. BD* ( 1) C 46 - C 48 | 0.45  | 0.83  | 0.025 |
| 625. BD* ( 2) C 32 - C 34 | /358. RY* ( 4) C 32        | 0.52  | 0.53  | 0.058 |
| 625. BD* ( 2) C 32 - C 34 | /373. RY* ( 3) C 34        | 1.16  | 0.48  | 0.082 |
| 628. BD* ( 2) C 33 - C 35 | /366. RY* ( 4) C 33        | 1.12  | 0.57  | 0.075 |
| 628. BD* ( 2) C 33 - C 35 | /382. RY* ( 4) C 35        | 1.11  | 0.57  | 0.075 |
| 635. BD* ( 2) C 36 - C 37 | /389. RY* ( 3) C 36        | 0.45  | 0.75  | 0.064 |
| 635. BD* ( 2) C 36 - C 37 | /647. BD* ( 1) N 42 - N 43 | 0.51  | 0.46  | 0.051 |
| 639. BD* ( 2) C 38 - C 39 | /405. RY* ( 3) C 38        | 0.71  | 0.46  | 0.074 |
| 639. BD* ( 2) C 38 - C 39 | /413. RY* ( 3) C 39        | 0.76  | 0.47  | 0.078 |
| 644. BD* ( 2) C 40 - C 41 | /421. RY* ( 3) C 40        | 0.57  | 0.53  | 0.074 |
| 644. BD* ( 2) C 40 - C 41 | /429. RY* ( 3) C 41        | 0.69  | 0.47  | 0.077 |
| 651. BD* ( 2) C 44 - C 46 | /454. RY* ( 4) C 44        | 0.80  | 0.67  | 0.061 |

|                           |                            |       |      |       |
|---------------------------|----------------------------|-------|------|-------|
| 651. BD* ( 2) C 44 - C 46 | /469. RY* ( 3) C 46        | 0.65  | 0.71 | 0.056 |
| 651. BD* ( 2) C 44 - C 46 | /653. BD* ( 2) C 45 - C 47 | 44.13 | 0.03 | 0.072 |
| 651. BD* ( 2) C 44 - C 46 | /660. BD* ( 2) C 48 - C 49 | 38.44 | 0.03 | 0.072 |
| 653. BD* ( 2) C 45 - C 47 | /461. RY* ( 3) C 45        | 0.77  | 0.52 | 0.075 |
| 653. BD* ( 2) C 45 - C 47 | /477. RY* ( 3) C 47        | 0.77  | 0.48 | 0.072 |
| 660. BD* ( 2) C 48 - C 49 | /485. RY* ( 3) C 48        | 0.47  | 0.74 | 0.065 |
| 660. BD* ( 2) C 48 - C 49 | /493. RY* ( 3) C 49        | 0.95  | 0.47 | 0.074 |

from unit 2 to unit 3

|                           |                            |      |      |       |
|---------------------------|----------------------------|------|------|-------|
| 54. BD ( 2) C 36 - C 37   | /664. BD* ( 1) O 62 - H 63 | 0.07 | 0.59 | 0.008 |
| 54. BD ( 2) C 36 - C 37   | /665. BD* ( 1) O 62 - H 64 | 0.07 | 0.60 | 0.009 |
| 66. BD ( 1) N 42 - N 43   | /529. RY* ( 1) O 62        | 0.10 | 2.74 | 0.021 |
| 66. BD ( 1) N 42 - N 43   | /530. RY* ( 2) O 62        | 0.03 | 2.35 | 0.010 |
| 67. BD ( 1) N 43 - C 44   | /529. RY* ( 1) O 62        | 0.04 | 2.54 | 0.012 |
| 75. BD ( 1) C 46 - O 65   | /529. RY* ( 1) O 62        | 0.05 | 2.64 | 0.015 |
| 149. LP ( 1) N 42         | /529. RY* ( 1) O 62        | 0.67 | 2.22 | 0.050 |
| 149. LP ( 1) N 42         | /530. RY* ( 2) O 62        | 0.15 | 1.83 | 0.021 |
| 149. LP ( 1) N 42         | /531. RY* ( 3) O 62        | 0.08 | 1.52 | 0.014 |
| 149. LP ( 1) N 42         | /532. RY* ( 4) O 62        | 0.08 | 1.68 | 0.015 |
| 149. LP ( 1) N 42         | /537. RY* ( 1) H 63        | 0.15 | 0.98 | 0.016 |
| 149. LP ( 1) N 42         | /539. RY* ( 1) H 64        | 0.21 | 1.08 | 0.020 |
| 149. LP ( 1) N 42         | /665. BD* ( 1) O 62 - H 64 | 0.03 | 0.77 | 0.007 |
| 150. LP ( 2) N 42         | /529. RY* ( 1) O 62        | 0.11 | 2.10 | 0.019 |
| 150. LP ( 2) N 42         | /530. RY* ( 2) O 62        | 0.03 | 1.71 | 0.009 |
| 150. LP ( 2) N 42         | /537. RY* ( 1) H 63        | 0.03 | 0.86 | 0.006 |
| 150. LP ( 2) N 42         | /539. RY* ( 1) H 64        | 0.03 | 0.95 | 0.007 |
| 157. LP ( 1) O 65         | /529. RY* ( 1) O 62        | 0.10 | 2.37 | 0.019 |
| 157. LP ( 1) O 65         | /537. RY* ( 1) H 63        | 0.03 | 1.14 | 0.008 |
| 157. LP ( 1) O 65         | /539. RY* ( 1) H 64        | 0.04 | 1.23 | 0.008 |
| 158. LP ( 2) O 65         | /529. RY* ( 1) O 62        | 0.15 | 2.26 | 0.024 |
| 158. LP ( 2) O 65         | /530. RY* ( 2) O 62        | 0.07 | 1.87 | 0.014 |
| 158. LP ( 2) O 65         | /532. RY* ( 4) O 62        | 0.05 | 1.73 | 0.012 |
| 158. LP ( 2) O 65         | /537. RY* ( 1) H 63        | 0.04 | 1.03 | 0.008 |
| 158. LP ( 2) O 65         | /539. RY* ( 1) H 64        | 0.05 | 1.12 | 0.009 |
| 159. LP ( 3) O 65         | /529. RY* ( 1) O 62        | 0.19 | 2.15 | 0.026 |
| 159. LP ( 3) O 65         | /530. RY* ( 2) O 62        | 0.09 | 1.76 | 0.016 |
| 159. LP ( 3) O 65         | /531. RY* ( 3) O 62        | 0.03 | 1.46 | 0.008 |
| 159. LP ( 3) O 65         | /532. RY* ( 4) O 62        | 0.05 | 1.62 | 0.012 |
| 159. LP ( 3) O 65         | /537. RY* ( 1) H 63        | 0.04 | 0.92 | 0.008 |
| 159. LP ( 3) O 65         | /539. RY* ( 1) H 64        | 0.06 | 1.01 | 0.010 |
| 159. LP ( 3) O 65         | /664. BD* ( 1) O 62 - H 63 | 0.04 | 0.70 | 0.007 |
| 635. BD* ( 2) C 36 - C 37 | /665. BD* ( 1) O 62 - H 64 | 0.05 | 0.28 | 0.013 |

from unit 2 to unit 4

|                         |                     |      |      |       |
|-------------------------|---------------------|------|------|-------|
| 66. BD ( 1) N 42 - N 43 | /551. RY* ( 3)C1 66 | 0.03 | 2.36 | 0.011 |
| 67. BD ( 1) N 43 - C 44 | /551. RY* ( 3)C1 66 | 0.03 | 2.16 | 0.010 |
| 149. LP ( 1) N 42       | /549. RY* ( 1)C1 66 | 0.15 | 1.04 | 0.016 |
| 149. LP ( 1) N 42       | /550. RY* ( 2)C1 66 | 0.18 | 1.09 | 0.018 |
| 149. LP ( 1) N 42       | /551. RY* ( 3)C1 66 | 0.42 | 1.84 | 0.036 |
| 150. LP ( 2) N 42       | /549. RY* ( 1)C1 66 | 0.05 | 0.92 | 0.009 |
| 150. LP ( 2) N 42       | /551. RY* ( 3)C1 66 | 0.03 | 1.72 | 0.009 |
| 157. LP ( 1) O 65       | /550. RY* ( 2)C1 66 | 0.05 | 1.24 | 0.010 |
| 157. LP ( 1) O 65       | /551. RY* ( 3)C1 66 | 0.08 | 1.99 | 0.016 |
| 158. LP ( 2) O 65       | /549. RY* ( 1)C1 66 | 0.10 | 1.09 | 0.014 |
| 158. LP ( 2) O 65       | /551. RY* ( 3)C1 66 | 0.17 | 1.88 | 0.023 |
| 159. LP ( 3) O 65       | /549. RY* ( 1)C1 66 | 0.07 | 0.97 | 0.010 |
| 159. LP ( 3) O 65       | /550. RY* ( 2)C1 66 | 0.03 | 1.02 | 0.007 |
| 159. LP ( 3) O 65       | /551. RY* ( 3)C1 66 | 0.17 | 1.77 | 0.022 |

from unit 2 to unit 5

|                         |                      |      |       |       |
|-------------------------|----------------------|------|-------|-------|
| 51. BD ( 1) C 35 - C 37 | /169. LP* ( 6)Fe 67  | 0.08 | 1.17  | 0.013 |
| 53. BD ( 1) C 36 - C 37 | /172. LP* ( 9)Fe 67  | 0.05 | 2.44  | 0.015 |
| 53. BD ( 1) C 36 - C 37 | /561. RY* ( 1)Fe 67  | 0.03 | 1.40  | 0.008 |
| 53. BD ( 1) C 36 - C 37 | /571. RY* ( 11)Fe 67 | 0.03 | 10.30 | 0.022 |
| 55. BD ( 1) C 36 - H 61 | /169. LP* ( 6)Fe 67  | 0.04 | 1.05  | 0.008 |
| 55. BD ( 1) C 36 - H 61 | /563. RY* ( 3)Fe 67  | 0.03 | 4.68  | 0.015 |
| 56. BD ( 1) C 37 - N 42 | /169. LP* ( 6)Fe 67  | 0.85 | 1.31  | 0.045 |
| 56. BD ( 1) C 37 - N 42 | /171. LP* ( 8)Fe 67  | 0.09 | 2.54  | 0.019 |
| 56. BD ( 1) C 37 - N 42 | /567. RY* ( 7)Fe 67  | 0.09 | 2.85  | 0.020 |
| 56. BD ( 1) C 37 - N 42 | /568. RY* ( 8)Fe 67  | 0.03 | 9.61  | 0.022 |
| 66. BD ( 1) N 42 - N 43 | /169. LP* ( 6)Fe 67  | 1.39 | 1.51  | 0.062 |

|                         |                       |       |        |       |
|-------------------------|-----------------------|-------|--------|-------|
| 66. BD ( 1) N 42 - N 43 | /171. LP* ( 8) Fe 67  | 0.06  | 2.73   | 0.016 |
| 66. BD ( 1) N 42 - N 43 | /172. LP* ( 9) Fe 67  | 0.05  | 2.66   | 0.015 |
| 66. BD ( 1) N 42 - N 43 | /561. RY* ( 1) Fe 67  | 0.03  | 1.62   | 0.009 |
| 66. BD ( 1) N 42 - N 43 | /562. RY* ( 2) Fe 67  | 0.04  | 2.59   | 0.013 |
| 66. BD ( 1) N 42 - N 43 | /563. RY* ( 3) Fe 67  | 0.43  | 5.13   | 0.059 |
| 66. BD ( 1) N 42 - N 43 | /568. RY* ( 8) Fe 67  | 0.08  | 9.80   | 0.035 |
| 66. BD ( 1) N 42 - N 43 | /573. RY* ( 13) Fe 67 | 0.03  | 7.66   | 0.018 |
| 66. BD ( 1) N 42 - N 43 | /575. RY* ( 15) Fe 67 | 0.10  | 166.36 | 0.165 |
| 66. BD ( 1) N 42 - N 43 | /579. RY* ( 19) Fe 67 | 0.06  | 730.90 | 0.255 |
| 66. BD ( 1) N 42 - N 43 | /580. RY* ( 20) Fe 67 | 0.19  | 49.00  | 0.123 |
| 67. BD ( 1) N 43 - C 44 | /169. LP* ( 6) Fe 67  | 0.18  | 1.31   | 0.021 |
| 67. BD ( 1) N 43 - C 44 | /172. LP* ( 9) Fe 67  | 0.07  | 2.47   | 0.017 |
| 67. BD ( 1) N 43 - C 44 | /563. RY* ( 3) Fe 67  | 0.17  | 4.94   | 0.036 |
| 67. BD ( 1) N 43 - C 44 | /567. RY* ( 7) Fe 67  | 0.04  | 2.84   | 0.014 |
| 67. BD ( 1) N 43 - C 44 | /571. RY* ( 11) Fe 67 | 0.08  | 10.32  | 0.037 |
| 67. BD ( 1) N 43 - C 44 | /575. RY* ( 15) Fe 67 | 0.08  | 166.16 | 0.148 |
| 67. BD ( 1) N 43 - C 44 | /579. RY* ( 19) Fe 67 | 0.04  | 730.71 | 0.217 |
| 67. BD ( 1) N 43 - C 44 | /580. RY* ( 20) Fe 67 | 0.17  | 48.80  | 0.116 |
| 68. BD ( 1) C 44 - C 45 | /169. LP* ( 6) Fe 67  | 0.04  | 1.19   | 0.009 |
| 69. BD ( 1) C 44 - C 46 | /169. LP* ( 6) Fe 67  | 0.14  | 1.31   | 0.018 |
| 69. BD ( 1) C 44 - C 46 | /170. LP* ( 7) Fe 67  | 0.03  | 2.28   | 0.010 |
| 69. BD ( 1) C 44 - C 46 | /563. RY* ( 3) Fe 67  | 0.03  | 4.94   | 0.016 |
| 70. BD ( 2) C 44 - C 46 | /169. LP* ( 6) Fe 67  | 0.07  | 0.84   | 0.010 |
| 70. BD ( 2) C 44 - C 46 | /171. LP* ( 8) Fe 67  | 0.03  | 2.06   | 0.010 |
| 74. BD ( 1) C 46 - C 48 | /169. LP* ( 6) Fe 67  | 0.19  | 1.19   | 0.020 |
| 74. BD ( 1) C 46 - C 48 | /171. LP* ( 8) Fe 67  | 0.05  | 2.41   | 0.013 |
| 74. BD ( 1) C 46 - C 48 | /563. RY* ( 3) Fe 67  | 0.03  | 4.82   | 0.015 |
| 74. BD ( 1) C 46 - C 48 | /580. RY* ( 20) Fe 67 | 0.03  | 48.68  | 0.046 |
| 75. BD ( 1) C 46 - O 65 | /169. LP* ( 6) Fe 67  | 1.17  | 1.40   | 0.055 |
| 75. BD ( 1) C 46 - O 65 | /171. LP* ( 8) Fe 67  | 0.27  | 2.62   | 0.034 |
| 75. BD ( 1) C 46 - O 65 | /562. RY* ( 2) Fe 67  | 0.04  | 2.49   | 0.013 |
| 75. BD ( 1) C 46 - O 65 | /563. RY* ( 3) Fe 67  | 0.10  | 5.03   | 0.028 |
| 75. BD ( 1) C 46 - O 65 | /568. RY* ( 8) Fe 67  | 0.07  | 9.69   | 0.033 |
| 75. BD ( 1) C 46 - O 65 | /569. RY* ( 9) Fe 67  | 0.10  | 10.05  | 0.039 |
| 75. BD ( 1) C 46 - O 65 | /572. RY* ( 12) Fe 67 | 0.09  | 7.59   | 0.032 |
| 75. BD ( 1) C 46 - O 65 | /578. RY* ( 18) Fe 67 | 0.04  | 30.73  | 0.047 |
| 110. CR ( 1) C 37       | /169. LP* ( 6) Fe 67  | 0.03  | 10.61  | 0.024 |
| 115. CR ( 1) N 42       | /169. LP* ( 6) Fe 67  | 1.22  | 14.74  | 0.184 |
| 116. CR ( 1) N 43       | /169. LP* ( 6) Fe 67  | 0.05  | 14.73  | 0.036 |
| 119. CR ( 1) C 46       | /169. LP* ( 6) Fe 67  | 0.07  | 10.65  | 0.037 |
| 125. CR ( 1) O 65       | /169. LP* ( 6) Fe 67  | 1.41  | 19.47  | 0.227 |
| 149. LP ( 1) N 42       | /169. LP* ( 6) Fe 67  | 19.24 | 0.98   | 0.183 |
| 149. LP ( 1) N 42       | /170. LP* ( 7) Fe 67  | 0.06  | 1.95   | 0.014 |
| 149. LP ( 1) N 42       | /171. LP* ( 8) Fe 67  | 0.15  | 2.20   | 0.023 |
| 149. LP ( 1) N 42       | /172. LP* ( 9) Fe 67  | 1.49  | 2.14   | 0.073 |
| 149. LP ( 1) N 42       | /562. RY* ( 2) Fe 67  | 0.31  | 2.07   | 0.033 |
| 149. LP ( 1) N 42       | /563. RY* ( 3) Fe 67  | 2.96  | 4.61   | 0.151 |
| 149. LP ( 1) N 42       | /567. RY* ( 7) Fe 67  | 0.82  | 2.52   | 0.059 |
| 149. LP ( 1) N 42       | /570. RY* ( 10) Fe 67 | 0.13  | 6.32   | 0.037 |
| 149. LP ( 1) N 42       | /571. RY* ( 11) Fe 67 | 0.09  | 10.00  | 0.039 |
| 149. LP ( 1) N 42       | /572. RY* ( 12) Fe 67 | 0.03  | 7.17   | 0.018 |
| 149. LP ( 1) N 42       | /573. RY* ( 13) Fe 67 | 0.23  | 7.14   | 0.053 |
| 149. LP ( 1) N 42       | /574. RY* ( 14) Fe 67 | 0.06  | 6.98   | 0.027 |
| 149. LP ( 1) N 42       | /575. RY* ( 15) Fe 67 | 1.11  | 165.83 | 0.554 |
| 149. LP ( 1) N 42       | /579. RY* ( 19) Fe 67 | 0.51  | 730.38 | 0.787 |
| 149. LP ( 1) N 42       | /580. RY* ( 20) Fe 67 | 2.23  | 48.47  | 0.425 |
| 150. LP ( 2) N 42       | /169. LP* ( 6) Fe 67  | 4.86  | 0.86   | 0.086 |
| 150. LP ( 2) N 42       | /171. LP* ( 8) Fe 67  | 0.11  | 2.08   | 0.020 |
| 150. LP ( 2) N 42       | /172. LP* ( 9) Fe 67  | 0.41  | 2.02   | 0.037 |
| 150. LP ( 2) N 42       | /562. RY* ( 2) Fe 67  | 0.03  | 1.94   | 0.010 |
| 150. LP ( 2) N 42       | /563. RY* ( 3) Fe 67  | 0.46  | 4.49   | 0.059 |
| 150. LP ( 2) N 42       | /567. RY* ( 7) Fe 67  | 0.20  | 2.40   | 0.029 |
| 150. LP ( 2) N 42       | /570. RY* ( 10) Fe 67 | 0.06  | 6.20   | 0.024 |
| 150. LP ( 2) N 42       | /571. RY* ( 11) Fe 67 | 0.04  | 9.88   | 0.025 |
| 150. LP ( 2) N 42       | /575. RY* ( 15) Fe 67 | 0.16  | 165.71 | 0.214 |
| 150. LP ( 2) N 42       | /579. RY* ( 19) Fe 67 | 0.07  | 730.26 | 0.302 |
| 150. LP ( 2) N 42       | /580. RY* ( 20) Fe 67 | 0.33  | 48.35  | 0.165 |
| 151. LP ( 1) N 43       | /169. LP* ( 6) Fe 67  | 0.28  | 0.92   | 0.022 |
| 151. LP ( 1) N 43       | /172. LP* ( 9) Fe 67  | 0.12  | 2.08   | 0.020 |
| 151. LP ( 1) N 43       | /561. RY* ( 1) Fe 67  | 0.04  | 1.04   | 0.008 |
| 151. LP ( 1) N 43       | /563. RY* ( 3) Fe 67  | 0.03  | 4.55   | 0.015 |



|                   |                      |       |        |       |
|-------------------|----------------------|-------|--------|-------|
| 157. LP ( 1) O 65 | /169. LP* ( 6) Fe 67 | 4.72  | 1.13   | 0.099 |
| 157. LP ( 1) O 65 | /171. LP* ( 8) Fe 67 | 0.11  | 2.35   | 0.021 |
| 157. LP ( 1) O 65 | /172. LP* ( 9) Fe 67 | 0.03  | 2.29   | 0.010 |
| 157. LP ( 1) O 65 | /561. RY* ( 1) Fe 67 | 0.03  | 1.24   | 0.008 |
| 157. LP ( 1) O 65 | /562. RY* ( 2) Fe 67 | 0.03  | 2.22   | 0.011 |
| 157. LP ( 1) O 65 | /563. RY* ( 3) Fe 67 | 0.76  | 4.76   | 0.076 |
| 157. LP ( 1) O 65 | /565. RY* ( 5) Fe 67 | 0.09  | 2.08   | 0.018 |
| 157. LP ( 1) O 65 | /566. RY* ( 6) Fe 67 | 0.08  | 2.38   | 0.018 |
| 157. LP ( 1) O 65 | /567. RY* ( 7) Fe 67 | 0.17  | 2.67   | 0.027 |
| 157. LP ( 1) O 65 | /570. RY* (10) Fe 67 | 0.04  | 6.47   | 0.021 |
| 157. LP ( 1) O 65 | /573. RY* (13) Fe 67 | 0.05  | 7.29   | 0.025 |
| 157. LP ( 1) O 65 | /575. RY* (15) Fe 67 | 0.21  | 165.98 | 0.238 |
| 157. LP ( 1) O 65 | /579. RY* (19) Fe 67 | 0.12  | 730.53 | 0.371 |
| 157. LP ( 1) O 65 | /580. RY* (20) Fe 67 | 0.42  | 48.62  | 0.182 |
| 158. LP ( 2) O 65 | /169. LP* ( 6) Fe 67 | 10.86 | 1.03   | 0.143 |
| 158. LP ( 2) O 65 | /170. LP* ( 7) Fe 67 | 0.06  | 2.00   | 0.014 |
| 158. LP ( 2) O 65 | /171. LP* ( 8) Fe 67 | 1.11  | 2.25   | 0.064 |
| 158. LP ( 2) O 65 | /561. RY* ( 1) Fe 67 | 0.12  | 1.14   | 0.015 |
| 158. LP ( 2) O 65 | /563. RY* ( 3) Fe 67 | 1.15  | 4.66   | 0.094 |
| 158. LP ( 2) O 65 | /565. RY* ( 5) Fe 67 | 0.12  | 1.97   | 0.020 |
| 158. LP ( 2) O 65 | /566. RY* ( 6) Fe 67 | 0.03  | 2.28   | 0.010 |
| 158. LP ( 2) O 65 | /567. RY* ( 7) Fe 67 | 0.54  | 2.56   | 0.048 |
| 158. LP ( 2) O 65 | /570. RY* (10) Fe 67 | 0.06  | 6.37   | 0.025 |
| 158. LP ( 2) O 65 | /573. RY* (13) Fe 67 | 0.10  | 7.18   | 0.034 |
| 158. LP ( 2) O 65 | /575. RY* (15) Fe 67 | 0.44  | 165.88 | 0.347 |
| 158. LP ( 2) O 65 | /579. RY* (19) Fe 67 | 0.21  | 730.43 | 0.502 |
| 158. LP ( 2) O 65 | /580. RY* (20) Fe 67 | 0.90  | 48.52  | 0.267 |
| 159. LP ( 3) O 65 | /169. LP* ( 6) Fe 67 | 9.47  | 0.92   | 0.124 |
| 159. LP ( 3) O 65 | /171. LP* ( 8) Fe 67 | 0.98  | 2.14   | 0.059 |
| 159. LP ( 3) O 65 | /172. LP* ( 9) Fe 67 | 0.10  | 2.08   | 0.019 |
| 159. LP ( 3) O 65 | /561. RY* ( 1) Fe 67 | 0.26  | 1.03   | 0.021 |
| 159. LP ( 3) O 65 | /563. RY* ( 3) Fe 67 | 1.09  | 4.55   | 0.091 |
| 159. LP ( 3) O 65 | /565. RY* ( 5) Fe 67 | 0.07  | 1.86   | 0.015 |
| 159. LP ( 3) O 65 | /567. RY* ( 7) Fe 67 | 0.26  | 2.45   | 0.033 |
| 159. LP ( 3) O 65 | /569. RY* ( 9) Fe 67 | 0.03  | 9.57   | 0.024 |
| 159. LP ( 3) O 65 | /570. RY* (10) Fe 67 | 0.03  | 6.26   | 0.017 |
| 159. LP ( 3) O 65 | /573. RY* (13) Fe 67 | 0.06  | 7.07   | 0.026 |
| 159. LP ( 3) O 65 | /575. RY* (15) Fe 67 | 0.41  | 165.77 | 0.339 |
| 159. LP ( 3) O 65 | /579. RY* (19) Fe 67 | 0.18  | 730.32 | 0.474 |
| 159. LP ( 3) O 65 | /580. RY* (20) Fe 67 | 0.85  | 48.41  | 0.263 |

from unit 3 to unit 1

|                         |                            |      |      |       |
|-------------------------|----------------------------|------|------|-------|
| 83. BD ( 1) O 62 - H 63 | /253. RY* ( 1) N 11        | 0.13 | 1.90 | 0.020 |
| 83. BD ( 1) O 62 - H 63 | /254. RY* ( 2) N 11        | 0.13 | 2.55 | 0.023 |
| 83. BD ( 1) O 62 - H 63 | /255. RY* ( 3) N 11        | 0.09 | 2.03 | 0.017 |
| 83. BD ( 1) O 62 - H 63 | /256. RY* ( 4) N 11        | 0.04 | 2.33 | 0.012 |
| 83. BD ( 1) O 62 - H 63 | /264. RY* ( 4) N 12        | 0.03 | 2.43 | 0.011 |
| 83. BD ( 1) O 62 - H 63 | /285. RY* ( 1) C 15        | 0.04 | 1.92 | 0.011 |
| 83. BD ( 1) O 62 - H 63 | /288. RY* ( 4) C 15        | 0.03 | 1.47 | 0.008 |
| 83. BD ( 1) O 62 - H 63 | /289. RY* ( 5) C 15        | 0.03 | 3.80 | 0.013 |
| 83. BD ( 1) O 62 - H 63 | /610. BD* ( 2) C 13 - C 15 | 0.04 | 0.83 | 0.008 |
| 84. BD ( 1) O 62 - H 64 | /253. RY* ( 1) N 11        | 0.05 | 1.90 | 0.013 |
| 84. BD ( 1) O 62 - H 64 | /254. RY* ( 2) N 11        | 0.05 | 2.55 | 0.014 |
| 84. BD ( 1) O 62 - H 64 | /255. RY* ( 3) N 11        | 0.04 | 2.03 | 0.011 |
| 84. BD ( 1) O 62 - H 64 | /615. BD* ( 1) C 15 - O 19 | 0.03 | 1.12 | 0.007 |
| 155. LP ( 1) O 62       | /253. RY* ( 1) N 11        | 0.03 | 1.62 | 0.008 |
| 155. LP ( 1) O 62       | /269. RY* ( 1) C 13        | 0.03 | 1.64 | 0.008 |
| 155. LP ( 1) O 62       | /271. RY* ( 3) C 13        | 0.03 | 1.45 | 0.008 |
| 155. LP ( 1) O 62       | /286. RY* ( 2) C 15        | 0.03 | 1.94 | 0.009 |
| 155. LP ( 1) O 62       | /288. RY* ( 4) C 15        | 0.04 | 1.19 | 0.009 |
| 155. LP ( 1) O 62       | /596. BD* ( 1) C 6 - N 11  | 0.04 | 0.90 | 0.008 |
| 155. LP ( 1) O 62       | /615. BD* ( 1) C 15 - O 19 | 0.04 | 0.84 | 0.007 |
| 156. LP ( 2) O 62       | /208. RY* ( 4) C 5         | 0.03 | 1.54 | 0.008 |
| 156. LP ( 2) O 62       | /213. RY* ( 1) C 6         | 0.06 | 1.79 | 0.014 |
| 156. LP ( 2) O 62       | /253. RY* ( 1) N 11        | 0.38 | 1.75 | 0.033 |
| 156. LP ( 2) O 62       | /254. RY* ( 2) N 11        | 0.41 | 2.39 | 0.040 |
| 156. LP ( 2) O 62       | /255. RY* ( 3) N 11        | 0.20 | 1.88 | 0.024 |
| 156. LP ( 2) O 62       | /256. RY* ( 4) N 11        | 0.09 | 2.17 | 0.018 |
| 156. LP ( 2) O 62       | /262. RY* ( 2) N 12        | 0.03 | 1.51 | 0.009 |
| 156. LP ( 2) O 62       | /263. RY* ( 3) N 12        | 0.03 | 1.71 | 0.008 |
| 156. LP ( 2) O 62       | /271. RY* ( 3) C 13        | 0.03 | 1.58 | 0.008 |

|                   |                           |      |      |       |
|-------------------|---------------------------|------|------|-------|
| 156. LP ( 2) O 62 | /285. RY* ( 1) C 15       | 0.13 | 1.77 | 0.019 |
| 156. LP ( 2) O 62 | /286. RY* ( 2) C 15       | 0.09 | 2.07 | 0.017 |
| 156. LP ( 2) O 62 | /288. RY* ( 4) C 15       | 0.09 | 1.31 | 0.014 |
| 156. LP ( 2) O 62 | /289. RY* ( 5) C 15       | 0.09 | 3.64 | 0.023 |
| 156. LP ( 2) O 62 | /317. RY* ( 1) O 19       | 0.09 | 2.82 | 0.020 |
| 156. LP ( 2) O 62 | /320. RY* ( 4) O 19       | 0.05 | 2.48 | 0.014 |
| 156. LP ( 2) O 62 | /596. BD* ( 1) C 6 - N 11 | 0.06 | 1.03 | 0.010 |

from unit 3 to unit 2

|                         |                            |      |      |       |
|-------------------------|----------------------------|------|------|-------|
| 83. BD ( 1) O 62 - H 63 | /396. RY* ( 2) C 37        | 0.04 | 1.90 | 0.010 |
| 83. BD ( 1) O 62 - H 63 | /398. RY* ( 4) C 37        | 0.03 | 1.75 | 0.009 |
| 83. BD ( 1) O 62 - H 63 | /436. RY* ( 2) N 42        | 0.03 | 2.36 | 0.011 |
| 83. BD ( 1) O 62 - H 63 | /437. RY* ( 3) N 42        | 0.05 | 2.08 | 0.013 |
| 84. BD ( 1) O 62 - H 64 | /396. RY* ( 2) C 37        | 0.04 | 1.90 | 0.010 |
| 84. BD ( 1) O 62 - H 64 | /436. RY* ( 2) N 42        | 0.03 | 2.36 | 0.011 |
| 84. BD ( 1) O 62 - H 64 | /437. RY* ( 3) N 42        | 0.05 | 2.08 | 0.013 |
| 156. LP ( 2) O 62       | /395. RY* ( 1) C 37        | 0.04 | 1.77 | 0.011 |
| 156. LP ( 2) O 62       | /396. RY* ( 2) C 37        | 0.09 | 1.75 | 0.016 |
| 156. LP ( 2) O 62       | /398. RY* ( 4) C 37        | 0.04 | 1.59 | 0.010 |
| 156. LP ( 2) O 62       | /399. RY* ( 5) C 37        | 0.04 | 3.61 | 0.014 |
| 156. LP ( 2) O 62       | /400. RY* ( 6) C 37        | 0.03 | 3.77 | 0.015 |
| 156. LP ( 2) O 62       | /435. RY* ( 1) N 42        | 0.04 | 1.89 | 0.011 |
| 156. LP ( 2) O 62       | /436. RY* ( 2) N 42        | 0.15 | 2.21 | 0.023 |
| 156. LP ( 2) O 62       | /437. RY* ( 3) N 42        | 0.39 | 1.92 | 0.035 |
| 156. LP ( 2) O 62       | /443. RY* ( 1) N 43        | 0.03 | 1.48 | 0.009 |
| 156. LP ( 2) O 62       | /445. RY* ( 3) N 43        | 0.11 | 1.72 | 0.018 |
| 156. LP ( 2) O 62       | /467. RY* ( 1) C 46        | 0.08 | 1.80 | 0.016 |
| 156. LP ( 2) O 62       | /468. RY* ( 2) C 46        | 0.06 | 2.05 | 0.014 |
| 156. LP ( 2) O 62       | /469. RY* ( 3) C 46        | 0.08 | 1.36 | 0.013 |
| 156. LP ( 2) O 62       | /471. RY* ( 5) C 46        | 0.06 | 3.64 | 0.019 |
| 156. LP ( 2) O 62       | /541. RY* ( 1) O 65        | 0.03 | 2.73 | 0.011 |
| 156. LP ( 2) O 62       | /544. RY* ( 4) O 65        | 0.03 | 2.18 | 0.011 |
| 156. LP ( 2) O 62       | /635. BD* ( 2) C 36 - C 37 | 0.03 | 0.68 | 0.006 |
| 156. LP ( 2) O 62       | /637. BD* ( 1) C 37 - N 42 | 0.03 | 1.02 | 0.007 |
| 156. LP ( 2) O 62       | /647. BD* ( 1) N 42 - N 43 | 0.16 | 1.14 | 0.017 |

within unit 3

|                   |                     |      |       |       |
|-------------------|---------------------|------|-------|-------|
| 124. CR ( 1) O 62 | /538. RY* ( 2) H 63 | 0.46 | 21.17 | 0.125 |
| 124. CR ( 1) O 62 | /540. RY* ( 2) H 64 | 0.36 | 21.17 | 0.110 |
| 155. LP ( 1) O 62 | /538. RY* ( 2) H 63 | 0.27 | 2.71  | 0.034 |
| 155. LP ( 1) O 62 | /540. RY* ( 2) H 64 | 0.28 | 2.71  | 0.035 |
| 156. LP ( 2) O 62 | /529. RY* ( 1) O 62 | 2.11 | 2.41  | 0.091 |
| 156. LP ( 2) O 62 | /530. RY* ( 2) O 62 | 0.34 | 2.02  | 0.033 |
| 156. LP ( 2) O 62 | /532. RY* ( 4) O 62 | 0.33 | 1.87  | 0.032 |
| 156. LP ( 2) O 62 | /537. RY* ( 1) H 63 | 0.76 | 1.17  | 0.038 |
| 156. LP ( 2) O 62 | /539. RY* ( 1) H 64 | 0.61 | 1.27  | 0.036 |
| 156. LP ( 2) O 62 | /540. RY* ( 2) H 64 | 0.29 | 2.83  | 0.037 |

from unit 3 to unit 4

|                         |                     |      |      |       |
|-------------------------|---------------------|------|------|-------|
| 83. BD ( 1) O 62 - H 63 | /550. RY* ( 2)C1 66 | 0.03 | 1.43 | 0.008 |
| 83. BD ( 1) O 62 - H 63 | /551. RY* ( 3)C1 66 | 0.08 | 2.18 | 0.017 |
| 84. BD ( 1) O 62 - H 64 | /551. RY* ( 3)C1 66 | 0.05 | 2.18 | 0.013 |
| 156. LP ( 2) O 62       | /549. RY* ( 1)C1 66 | 0.27 | 1.23 | 0.023 |
| 156. LP ( 2) O 62       | /550. RY* ( 2)C1 66 | 0.30 | 1.28 | 0.025 |
| 156. LP ( 2) O 62       | /551. RY* ( 3)C1 66 | 0.61 | 2.03 | 0.045 |

from unit 3 to unit 5

|                         |                      |      |        |       |
|-------------------------|----------------------|------|--------|-------|
| 83. BD ( 1) O 62 - H 63 | /169. LP* ( 6)Fe 67  | 2.99 | 1.33   | 0.086 |
| 83. BD ( 1) O 62 - H 63 | /171. LP* ( 8)Fe 67  | 0.03 | 2.55   | 0.011 |
| 83. BD ( 1) O 62 - H 63 | /561. RY* ( 1)Fe 67  | 0.03 | 1.44   | 0.008 |
| 83. BD ( 1) O 62 - H 63 | /562. RY* ( 2)Fe 67  | 0.24 | 2.41   | 0.031 |
| 83. BD ( 1) O 62 - H 63 | /563. RY* ( 3)Fe 67  | 0.82 | 4.95   | 0.081 |
| 83. BD ( 1) O 62 - H 63 | /564. RY* ( 4)Fe 67  | 0.03 | 2.19   | 0.010 |
| 83. BD ( 1) O 62 - H 63 | /565. RY* ( 5)Fe 67  | 0.03 | 2.27   | 0.010 |
| 83. BD ( 1) O 62 - H 63 | /567. RY* ( 7)Fe 67  | 0.04 | 2.86   | 0.013 |
| 83. BD ( 1) O 62 - H 63 | /568. RY* ( 8)Fe 67  | 0.09 | 9.62   | 0.038 |
| 83. BD ( 1) O 62 - H 63 | /570. RY* ( 10)Fe 67 | 0.04 | 6.67   | 0.021 |
| 83. BD ( 1) O 62 - H 63 | /573. RY* ( 13)Fe 67 | 0.07 | 7.48   | 0.028 |
| 83. BD ( 1) O 62 - H 63 | /575. RY* ( 15)Fe 67 | 0.23 | 166.18 | 0.245 |
| 83. BD ( 1) O 62 - H 63 | /579. RY* ( 19)Fe 67 | 0.12 | 730.72 | 0.372 |
| 83. BD ( 1) O 62 - H 63 | /580. RY* ( 20)Fe 67 | 0.44 | 48.82  | 0.185 |

|                         |                      |       |        |       |
|-------------------------|----------------------|-------|--------|-------|
| 84. BD ( 1) O 62 - H 64 | /169. LP* ( 6) Fe 67 | 2.87  | 1.33   | 0.085 |
| 84. BD ( 1) O 62 - H 64 | /562. RY* ( 2) Fe 67 | 0.29  | 2.41   | 0.033 |
| 84. BD ( 1) O 62 - H 64 | /563. RY* ( 3) Fe 67 | 0.62  | 4.95   | 0.070 |
| 84. BD ( 1) O 62 - H 64 | /566. RY* ( 6) Fe 67 | 0.03  | 2.57   | 0.011 |
| 84. BD ( 1) O 62 - H 64 | /567. RY* ( 7) Fe 67 | 0.13  | 2.86   | 0.024 |
| 84. BD ( 1) O 62 - H 64 | /569. RY* ( 9) Fe 67 | 0.07  | 9.98   | 0.034 |
| 84. BD ( 1) O 62 - H 64 | /573. RY* (13) Fe 67 | 0.04  | 7.48   | 0.021 |
| 84. BD ( 1) O 62 - H 64 | /574. RY* (14) Fe 67 | 0.07  | 7.32   | 0.028 |
| 84. BD ( 1) O 62 - H 64 | /575. RY* (15) Fe 67 | 0.18  | 166.18 | 0.220 |
| 84. BD ( 1) O 62 - H 64 | /579. RY* (19) Fe 67 | 0.10  | 730.72 | 0.333 |
| 84. BD ( 1) O 62 - H 64 | /580. RY* (20) Fe 67 | 0.36  | 48.82  | 0.166 |
| 124. CR ( 1) O 62       | /169. LP* ( 6) Fe 67 | 1.59  | 19.51  | 0.241 |
| 155. LP ( 1) O 62       | /169. LP* ( 6) Fe 67 | 1.18  | 1.05   | 0.048 |
| 155. LP ( 1) O 62       | /172. LP* ( 9) Fe 67 | 0.05  | 2.21   | 0.013 |
| 155. LP ( 1) O 62       | /561. RY* ( 1) Fe 67 | 0.03  | 1.16   | 0.007 |
| 155. LP ( 1) O 62       | /563. RY* ( 3) Fe 67 | 0.22  | 4.68   | 0.040 |
| 155. LP ( 1) O 62       | /566. RY* ( 6) Fe 67 | 0.03  | 2.30   | 0.011 |
| 155. LP ( 1) O 62       | /575. RY* (15) Fe 67 | 0.04  | 165.90 | 0.109 |
| 155. LP ( 1) O 62       | /579. RY* (19) Fe 67 | 0.03  | 730.45 | 0.179 |
| 155. LP ( 1) O 62       | /580. RY* (20) Fe 67 | 0.08  | 48.54  | 0.081 |
| 156. LP ( 2) O 62       | /169. LP* ( 6) Fe 67 | 22.76 | 1.17   | 0.221 |
| 156. LP ( 2) O 62       | /171. LP* ( 8) Fe 67 | 2.46  | 2.39   | 0.098 |
| 156. LP ( 2) O 62       | /172. LP* ( 9) Fe 67 | 0.07  | 2.33   | 0.016 |
| 156. LP ( 2) O 62       | /561. RY* ( 1) Fe 67 | 0.22  | 1.28   | 0.021 |
| 156. LP ( 2) O 62       | /562. RY* ( 2) Fe 67 | 0.05  | 2.26   | 0.014 |
| 156. LP ( 2) O 62       | /563. RY* ( 3) Fe 67 | 3.73  | 4.80   | 0.171 |
| 156. LP ( 2) O 62       | /564. RY* ( 4) Fe 67 | 0.05  | 2.03   | 0.013 |
| 156. LP ( 2) O 62       | /565. RY* ( 5) Fe 67 | 0.31  | 2.12   | 0.032 |
| 156. LP ( 2) O 62       | /566. RY* ( 6) Fe 67 | 0.11  | 2.42   | 0.021 |
| 156. LP ( 2) O 62       | /567. RY* ( 7) Fe 67 | 0.55  | 2.71   | 0.049 |
| 156. LP ( 2) O 62       | /568. RY* ( 8) Fe 67 | 0.41  | 9.46   | 0.080 |
| 156. LP ( 2) O 62       | /569. RY* ( 9) Fe 67 | 0.30  | 9.82   | 0.070 |
| 156. LP ( 2) O 62       | /570. RY* (10) Fe 67 | 0.17  | 6.51   | 0.043 |
| 156. LP ( 2) O 62       | /572. RY* (12) Fe 67 | 0.36  | 7.37   | 0.066 |
| 156. LP ( 2) O 62       | /573. RY* (13) Fe 67 | 0.30  | 7.33   | 0.060 |
| 156. LP ( 2) O 62       | /574. RY* (14) Fe 67 | 0.18  | 7.17   | 0.045 |
| 156. LP ( 2) O 62       | /575. RY* (15) Fe 67 | 1.36  | 166.02 | 0.608 |
| 156. LP ( 2) O 62       | /576. RY* (16) Fe 67 | 0.03  | 30.73  | 0.038 |
| 156. LP ( 2) O 62       | /577. RY* (17) Fe 67 | 0.22  | 7.23   | 0.051 |
| 156. LP ( 2) O 62       | /578. RY* (18) Fe 67 | 0.10  | 30.50  | 0.071 |
| 156. LP ( 2) O 62       | /579. RY* (19) Fe 67 | 0.64  | 730.57 | 0.874 |
| 156. LP ( 2) O 62       | /580. RY* (20) Fe 67 | 2.64  | 48.66  | 0.458 |
| 156. LP ( 2) O 62       | /581. RY* (21) Fe 67 | 0.04  | 30.42  | 0.044 |

from unit 4 to unit 1

|                    |                           |      |      |       |
|--------------------|---------------------------|------|------|-------|
| 160. LP ( 1) C1 66 | /254. RY* ( 2) N 11       | 0.04 | 2.48 | 0.013 |
| 160. LP ( 1) C1 66 | /317. RY* ( 1) O 19       | 0.04 | 2.91 | 0.014 |
| 160. LP ( 1) C1 66 | /594. BD* ( 2) C 5 - C 6  | 0.03 | 0.78 | 0.007 |
| 161. LP ( 2) C1 66 | /589. BD* ( 1) C 3 - C 5  | 0.03 | 0.76 | 0.006 |
| 161. LP ( 2) C1 66 | /594. BD* ( 2) C 5 - C 6  | 0.16 | 0.34 | 0.010 |
| 161. LP ( 2) C1 66 | /595. BD* ( 1) C 5 - H 31 | 0.05 | 0.73 | 0.008 |
| 162. LP ( 3) C1 66 | /595. BD* ( 1) C 5 - H 31 | 0.06 | 0.72 | 0.009 |
| 163. LP ( 4) C1 66 | /206. RY* ( 2) C 5        | 0.03 | 1.72 | 0.009 |
| 163. LP ( 4) C1 66 | /208. RY* ( 4) C 5        | 0.07 | 1.41 | 0.013 |
| 163. LP ( 4) C1 66 | /213. RY* ( 1) C 6        | 0.11 | 1.65 | 0.018 |
| 163. LP ( 4) C1 66 | /215. RY* ( 3) C 6        | 0.07 | 1.63 | 0.013 |
| 163. LP ( 4) C1 66 | /216. RY* ( 4) C 6        | 0.05 | 1.50 | 0.011 |
| 163. LP ( 4) C1 66 | /218. RY* ( 6) C 6        | 0.05 | 3.75 | 0.017 |
| 163. LP ( 4) C1 66 | /253. RY* ( 1) N 11       | 0.65 | 1.61 | 0.042 |
| 163. LP ( 4) C1 66 | /254. RY* ( 2) N 11       | 1.04 | 2.25 | 0.062 |
| 163. LP ( 4) C1 66 | /255. RY* ( 3) N 11       | 0.79 | 1.74 | 0.048 |
| 163. LP ( 4) C1 66 | /256. RY* ( 4) N 11       | 0.08 | 2.04 | 0.016 |
| 163. LP ( 4) C1 66 | /262. RY* ( 2) N 12       | 0.09 | 1.37 | 0.014 |
| 163. LP ( 4) C1 66 | /263. RY* ( 3) N 12       | 0.14 | 1.57 | 0.019 |
| 163. LP ( 4) C1 66 | /271. RY* ( 3) C 13       | 0.04 | 1.44 | 0.010 |
| 163. LP ( 4) C1 66 | /285. RY* ( 1) C 15       | 0.39 | 1.63 | 0.033 |
| 163. LP ( 4) C1 66 | /286. RY* ( 2) C 15       | 0.16 | 1.93 | 0.023 |
| 163. LP ( 4) C1 66 | /288. RY* ( 4) C 15       | 0.16 | 1.17 | 0.018 |
| 163. LP ( 4) C1 66 | /289. RY* ( 5) C 15       | 0.09 | 3.51 | 0.023 |
| 163. LP ( 4) C1 66 | /317. RY* ( 1) O 19       | 0.25 | 2.68 | 0.033 |
| 163. LP ( 4) C1 66 | /320. RY* ( 4) O 19       | 0.05 | 2.34 | 0.014 |

|                       |                            |      |        |       |
|-----------------------|----------------------------|------|--------|-------|
| 163. LP ( 4)C1 66     | /606. BD* ( 1) N 11 - N 12 | 0.06 | 1.01   | 0.010 |
| from unit 4 to unit 2 |                            |      |        |       |
| 160. LP ( 1)C1 66     | /437. RY* ( 3) N 42        | 0.03 | 2.01   | 0.010 |
| 160. LP ( 1)C1 66     | /644. BD* ( 2) C 40 - C 41 | 0.03 | 0.78   | 0.006 |
| 161. LP ( 2)C1 66     | /628. BD* ( 2) C 33 - C 35 | 0.03 | 0.33   | 0.005 |
| 161. LP ( 2)C1 66     | /635. BD* ( 2) C 36 - C 37 | 0.14 | 0.32   | 0.009 |
| 161. LP ( 2)C1 66     | /637. BD* ( 1) C 37 - N 42 | 0.05 | 0.66   | 0.008 |
| 161. LP ( 2)C1 66     | /644. BD* ( 2) C 40 - C 41 | 0.21 | 0.34   | 0.011 |
| 161. LP ( 2)C1 66     | /647. BD* ( 1) N 42 - N 43 | 0.05 | 0.79   | 0.008 |
| 161. LP ( 2)C1 66     | /656. BD* ( 1) C 46 - O 65 | 0.07 | 0.59   | 0.008 |
| 162. LP ( 3)C1 66     | /543. RY* ( 3) O 65        | 0.07 | 1.76   | 0.014 |
| 162. LP ( 3)C1 66     | /656. BD* ( 1) C 46 - O 65 | 0.81 | 0.58   | 0.027 |
| 163. LP ( 4)C1 66     | /395. RY* ( 1) C 37        | 0.14 | 1.63   | 0.019 |
| 163. LP ( 4)C1 66     | /396. RY* ( 2) C 37        | 0.22 | 1.61   | 0.024 |
| 163. LP ( 4)C1 66     | /398. RY* ( 4) C 37        | 0.18 | 1.46   | 0.021 |
| 163. LP ( 4)C1 66     | /399. RY* ( 5) C 37        | 0.04 | 3.47   | 0.015 |
| 163. LP ( 4)C1 66     | /400. RY* ( 6) C 37        | 0.05 | 3.63   | 0.018 |
| 163. LP ( 4)C1 66     | /402. RY* ( 8) C 37        | 0.05 | 3.28   | 0.016 |
| 163. LP ( 4)C1 66     | /435. RY* ( 1) N 42        | 0.24 | 1.76   | 0.026 |
| 163. LP ( 4)C1 66     | /436. RY* ( 2) N 42        | 1.11 | 2.07   | 0.062 |
| 163. LP ( 4)C1 66     | /437. RY* ( 3) N 42        | 1.02 | 1.79   | 0.055 |
| 163. LP ( 4)C1 66     | /438. RY* ( 4) N 42        | 0.05 | 1.98   | 0.013 |
| 163. LP ( 4)C1 66     | /443. RY* ( 1) N 43        | 0.12 | 1.34   | 0.016 |
| 163. LP ( 4)C1 66     | /444. RY* ( 2) N 43        | 0.05 | 1.37   | 0.010 |
| 163. LP ( 4)C1 66     | /445. RY* ( 3) N 43        | 0.17 | 1.58   | 0.021 |
| 163. LP ( 4)C1 66     | /453. RY* ( 3) C 44        | 0.08 | 1.41   | 0.014 |
| 163. LP ( 4)C1 66     | /467. RY* ( 1) C 46        | 0.56 | 1.67   | 0.039 |
| 163. LP ( 4)C1 66     | /468. RY* ( 2) C 46        | 0.15 | 1.91   | 0.022 |
| 163. LP ( 4)C1 66     | /469. RY* ( 3) C 46        | 0.17 | 1.22   | 0.019 |
| 163. LP ( 4)C1 66     | /470. RY* ( 4) C 46        | 0.04 | 1.52   | 0.010 |
| 163. LP ( 4)C1 66     | /471. RY* ( 5) C 46        | 0.07 | 3.50   | 0.020 |
| 163. LP ( 4)C1 66     | /541. RY* ( 1) O 65        | 1.15 | 2.59   | 0.070 |
| 163. LP ( 4)C1 66     | /543. RY* ( 3) O 65        | 0.23 | 1.98   | 0.028 |
| 163. LP ( 4)C1 66     | /544. RY* ( 4) O 65        | 0.31 | 2.04   | 0.032 |
| 163. LP ( 4)C1 66     | /635. BD* ( 2) C 36 - C 37 | 0.04 | 0.54   | 0.006 |
| 163. LP ( 4)C1 66     | /637. BD* ( 1) C 37 - N 42 | 0.07 | 0.88   | 0.010 |
| 163. LP ( 4)C1 66     | /647. BD* ( 1) N 42 - N 43 | 0.11 | 1.00   | 0.014 |
| 163. LP ( 4)C1 66     | /656. BD* ( 1) C 46 - O 65 | 0.85 | 0.80   | 0.033 |
| from unit 4 to unit 3 |                            |      |        |       |
| 160. LP ( 1)C1 66     | /529. RY* ( 1) O 62        | 0.03 | 2.50   | 0.010 |
| 160. LP ( 1)C1 66     | /665. BD* ( 1) O 62 - H 64 | 0.03 | 1.05   | 0.007 |
| 162. LP ( 3)C1 66     | /530. RY* ( 2) O 62        | 0.06 | 1.65   | 0.013 |
| 162. LP ( 3)C1 66     | /665. BD* ( 1) O 62 - H 64 | 0.77 | 0.59   | 0.027 |
| 163. LP ( 4)C1 66     | /529. RY* ( 1) O 62        | 2.38 | 2.27   | 0.095 |
| 163. LP ( 4)C1 66     | /530. RY* ( 2) O 62        | 0.72 | 1.88   | 0.048 |
| 163. LP ( 4)C1 66     | /531. RY* ( 3) O 62        | 0.46 | 1.58   | 0.035 |
| 163. LP ( 4)C1 66     | /532. RY* ( 4) O 62        | 0.14 | 1.73   | 0.020 |
| 163. LP ( 4)C1 66     | /537. RY* ( 1) H 63        | 0.67 | 1.04   | 0.034 |
| 163. LP ( 4)C1 66     | /539. RY* ( 1) H 64        | 0.88 | 1.13   | 0.041 |
| 163. LP ( 4)C1 66     | /664. BD* ( 1) O 62 - H 63 | 0.03 | 0.81   | 0.007 |
| 163. LP ( 4)C1 66     | /665. BD* ( 1) O 62 - H 64 | 0.61 | 0.82   | 0.029 |
| within unit 4         |                            |      |        |       |
| 163. LP ( 4)C1 66     | /550. RY* ( 2)C1 66        | 0.55 | 1.14   | 0.032 |
| 163. LP ( 4)C1 66     | /551. RY* ( 3)C1 66        | 1.38 | 1.89   | 0.066 |
| from unit 4 to unit 5 |                            |      |        |       |
| 126. CR ( 1)C1 66     | /169. LP* ( 6)Fe 67        | 0.28 | 100.54 | 0.229 |
| 127. CR ( 2)C1 66     | /169. LP* ( 6)Fe 67        | 2.20 | 11.14  | 0.215 |
| 129. CR ( 4)C1 66     | /169. LP* ( 6)Fe 67        | 0.13 | 7.67   | 0.043 |
| 130. CR ( 5)C1 66     | /169. LP* ( 6)Fe 67        | 0.11 | 7.68   | 0.039 |
| 160. LP ( 1)C1 66     | /169. LP* ( 6)Fe 67        | 2.70 | 1.26   | 0.080 |
| 160. LP ( 1)C1 66     | /170. LP* ( 7)Fe 67        | 0.13 | 2.23   | 0.022 |
| 160. LP ( 1)C1 66     | /562. RY* ( 2)Fe 67        | 0.03 | 2.34   | 0.011 |
| 160. LP ( 1)C1 66     | /563. RY* ( 3)Fe 67        | 0.30 | 4.89   | 0.049 |
| 160. LP ( 1)C1 66     | /567. RY* ( 7)Fe 67        | 0.08 | 2.80   | 0.018 |
| 160. LP ( 1)C1 66     | /575. RY* ( 15)Fe 67       | 0.08 | 166.11 | 0.148 |
| 160. LP ( 1)C1 66     | /579. RY* ( 19)Fe 67       | 0.05 | 730.66 | 0.246 |
| 160. LP ( 1)C1 66     | /580. RY* ( 20)Fe 67       | 0.16 | 48.75  | 0.113 |

|                   |                     |       |        |       |
|-------------------|---------------------|-------|--------|-------|
| 161. LP ( 2)Cl 66 | /169. LP* ( 6)Fe 67 | 0.37  | 0.82   | 0.024 |
| 161. LP ( 2)Cl 66 | /172. LP* ( 9)Fe 67 | 0.11  | 1.97   | 0.019 |
| 161. LP ( 2)Cl 66 | /563. RY* ( 3)Fe 67 | 0.05  | 4.44   | 0.020 |
| 161. LP ( 2)Cl 66 | /564. RY* ( 4)Fe 67 | 0.17  | 1.68   | 0.021 |
| 161. LP ( 2)Cl 66 | /580. RY* (20)Fe 67 | 0.03  | 48.31  | 0.052 |
| 162. LP ( 3)Cl 66 | /169. LP* ( 6)Fe 67 | 0.09  | 0.81   | 0.012 |
| 162. LP ( 3)Cl 66 | /566. RY* ( 6)Fe 67 | 0.03  | 2.05   | 0.010 |
| 162. LP ( 3)Cl 66 | /567. RY* ( 7)Fe 67 | 0.04  | 2.34   | 0.012 |
| 163. LP ( 4)Cl 66 | /169. LP* ( 6)Fe 67 | 33.84 | 1.03   | 0.251 |
| 163. LP ( 4)Cl 66 | /170. LP* ( 7)Fe 67 | 2.77  | 2.00   | 0.096 |
| 163. LP ( 4)Cl 66 | /172. LP* ( 9)Fe 67 | 0.08  | 2.19   | 0.016 |
| 163. LP ( 4)Cl 66 | /561. RY* ( 1)Fe 67 | 0.29  | 1.14   | 0.023 |
| 163. LP ( 4)Cl 66 | /562. RY* ( 2)Fe 67 | 1.84  | 2.12   | 0.080 |
| 163. LP ( 4)Cl 66 | /563. RY* ( 3)Fe 67 | 6.54  | 4.66   | 0.225 |
| 163. LP ( 4)Cl 66 | /564. RY* ( 4)Fe 67 | 0.03  | 1.89   | 0.009 |
| 163. LP ( 4)Cl 66 | /565. RY* ( 5)Fe 67 | 0.38  | 1.98   | 0.035 |
| 163. LP ( 4)Cl 66 | /567. RY* ( 7)Fe 67 | 1.55  | 2.57   | 0.081 |
| 163. LP ( 4)Cl 66 | /569. RY* ( 9)Fe 67 | 0.61  | 9.68   | 0.099 |
| 163. LP ( 4)Cl 66 | /570. RY* (10)Fe 67 | 0.35  | 6.37   | 0.061 |
| 163. LP ( 4)Cl 66 | /571. RY* (11)Fe 67 | 0.11  | 10.05  | 0.044 |
| 163. LP ( 4)Cl 66 | /572. RY* (12)Fe 67 | 0.19  | 7.23   | 0.048 |
| 163. LP ( 4)Cl 66 | /573. RY* (13)Fe 67 | 0.90  | 7.19   | 0.104 |
| 163. LP ( 4)Cl 66 | /574. RY* (14)Fe 67 | 0.04  | 7.03   | 0.022 |
| 163. LP ( 4)Cl 66 | /575. RY* (15)Fe 67 | 2.57  | 165.88 | 0.840 |
| 163. LP ( 4)Cl 66 | /578. RY* (18)Fe 67 | 0.05  | 30.36  | 0.051 |
| 163. LP ( 4)Cl 66 | /579. RY* (19)Fe 67 | 1.22  | 730.43 | 1.215 |
| 163. LP ( 4)Cl 66 | /580. RY* (20)Fe 67 | 5.07  | 48.52  | 0.639 |
| 163. LP ( 4)Cl 66 | /581. RY* (21)Fe 67 | 0.07  | 30.28  | 0.059 |

from unit 5 to unit 1

|                   |                            |      |        |       |
|-------------------|----------------------------|------|--------|-------|
| 131. CR ( 1)Fe 67 | /596. BD* ( 1) C 6 - N 11  | 0.03 | 256.20 | 0.108 |
| 131. CR ( 1)Fe 67 | /615. BD* ( 1) C 15 - O 19 | 0.03 | 256.14 | 0.115 |
| 132. CR ( 2)Fe 67 | /596. BD* ( 1) C 6 - N 11  | 0.15 | 29.53  | 0.086 |
| 132. CR ( 2)Fe 67 | /606. BD* ( 1) N 11 - N 12 | 0.10 | 29.65  | 0.068 |
| 132. CR ( 2)Fe 67 | /615. BD* ( 1) C 15 - O 19 | 0.17 | 29.47  | 0.091 |
| 133. CR ( 3)Fe 67 | /255. RY* ( 3) N 11        | 0.09 | 5.99   | 0.030 |
| 133. CR ( 3)Fe 67 | /285. RY* ( 1) C 15        | 0.04 | 5.88   | 0.019 |
| 133. CR ( 3)Fe 67 | /317. RY* ( 1) O 19        | 0.03 | 6.93   | 0.018 |
| 133. CR ( 3)Fe 67 | /596. BD* ( 1) C 6 - N 11  | 0.75 | 5.14   | 0.079 |
| 133. CR ( 3)Fe 67 | /606. BD* ( 1) N 11 - N 12 | 0.48 | 5.25   | 0.063 |
| 133. CR ( 3)Fe 67 | /607. BD* ( 1) N 12 - C 13 | 0.03 | 5.13   | 0.015 |
| 133. CR ( 3)Fe 67 | /614. BD* ( 1) C 15 - C 17 | 0.05 | 5.20   | 0.020 |
| 133. CR ( 3)Fe 67 | /615. BD* ( 1) C 15 - O 19 | 0.93 | 5.07   | 0.087 |
| 135. CR ( 5)Fe 67 | /255. RY* ( 3) N 11        | 0.05 | 3.67   | 0.017 |
| 135. CR ( 5)Fe 67 | /596. BD* ( 1) C 6 - N 11  | 0.16 | 2.82   | 0.027 |
| 135. CR ( 5)Fe 67 | /606. BD* ( 1) N 11 - N 12 | 0.20 | 2.94   | 0.031 |
| 137. CR ( 7)Fe 67 | /596. BD* ( 1) C 6 - N 11  | 0.11 | 2.82   | 0.022 |
| 137. CR ( 7)Fe 67 | /615. BD* ( 1) C 15 - O 19 | 0.15 | 2.76   | 0.026 |
| 139. CR ( 9)Fe 67 | /615. BD* ( 1) C 15 - O 19 | 0.26 | 2.77   | 0.034 |
| 164. LP ( 1)Fe 67 | /596. BD* ( 1) C 6 - N 11  | 0.04 | 0.79   | 0.007 |
| 164. LP ( 1)Fe 67 | /606. BD* ( 1) N 11 - N 12 | 0.05 | 0.91   | 0.009 |
| 164. LP ( 1)Fe 67 | /614. BD* ( 1) C 15 - C 17 | 0.03 | 0.85   | 0.006 |
| 164. LP ( 1)Fe 67 | /615. BD* ( 1) C 15 - O 19 | 0.03 | 0.73   | 0.006 |
| 165. LP ( 2)Fe 67 | /254. RY* ( 2) N 11        | 0.07 | 2.15   | 0.016 |
| 165. LP ( 2)Fe 67 | /317. RY* ( 1) O 19        | 0.34 | 2.58   | 0.038 |
| 165. LP ( 2)Fe 67 | /596. BD* ( 1) C 6 - N 11  | 0.07 | 0.79   | 0.010 |
| 165. LP ( 2)Fe 67 | /606. BD* ( 1) N 11 - N 12 | 0.07 | 0.91   | 0.010 |
| 166. LP ( 3)Fe 67 | /254. RY* ( 2) N 11        | 0.03 | 2.15   | 0.009 |
| 166. LP ( 3)Fe 67 | /255. RY* ( 3) N 11        | 0.03 | 1.64   | 0.009 |
| 166. LP ( 3)Fe 67 | /256. RY* ( 4) N 11        | 0.03 | 1.93   | 0.010 |
| 166. LP ( 3)Fe 67 | /257. RY* ( 5) N 11        | 0.03 | 4.35   | 0.015 |
| 166. LP ( 3)Fe 67 | /285. RY* ( 1) C 15        | 0.04 | 1.53   | 0.010 |
| 166. LP ( 3)Fe 67 | /317. RY* ( 1) O 19        | 0.44 | 2.58   | 0.042 |
| 166. LP ( 3)Fe 67 | /596. BD* ( 1) C 6 - N 11  | 0.11 | 0.79   | 0.012 |
| 166. LP ( 3)Fe 67 | /606. BD* ( 1) N 11 - N 12 | 0.31 | 0.90   | 0.021 |
| 167. LP ( 4)Fe 67 | /253. RY* ( 1) N 11        | 0.03 | 1.51   | 0.009 |
| 167. LP ( 4)Fe 67 | /254. RY* ( 2) N 11        | 0.19 | 2.15   | 0.025 |
| 167. LP ( 4)Fe 67 | /255. RY* ( 3) N 11        | 0.15 | 1.64   | 0.020 |
| 167. LP ( 4)Fe 67 | /256. RY* ( 4) N 11        | 0.06 | 1.93   | 0.013 |
| 167. LP ( 4)Fe 67 | /263. RY* ( 3) N 12        | 0.03 | 1.47   | 0.008 |
| 167. LP ( 4)Fe 67 | /317. RY* ( 1) O 19        | 0.46 | 2.58   | 0.043 |

|            |          |             |                |       |       |       |
|------------|----------|-------------|----------------|-------|-------|-------|
| 167. LP (  | 4) Fe 67 | /606. BD* ( | 1) N 11 - N 12 | 0.09  | 0.90  | 0.012 |
| 167. LP (  | 4) Fe 67 | /615. BD* ( | 1) C 15 - O 19 | 0.17  | 0.72  | 0.014 |
| 168. LP (  | 5) Fe 67 | /253. RY* ( | 1) N 11        | 0.56  | 1.49  | 0.036 |
| 168. LP (  | 5) Fe 67 | /254. RY* ( | 2) N 11        | 1.30  | 2.14  | 0.067 |
| 168. LP (  | 5) Fe 67 | /255. RY* ( | 3) N 11        | 0.33  | 1.62  | 0.029 |
| 168. LP (  | 5) Fe 67 | /259. RY* ( | 7) N 11        | 0.04  | 35.57 | 0.045 |
| 168. LP (  | 5) Fe 67 | /262. RY* ( | 2) N 12        | 0.03  | 1.26  | 0.007 |
| 168. LP (  | 5) Fe 67 | /264. RY* ( | 4) N 12        | 0.04  | 2.02  | 0.011 |
| 168. LP (  | 5) Fe 67 | /285. RY* ( | 1) C 15        | 0.03  | 1.52  | 0.009 |
| 168. LP (  | 5) Fe 67 | /288. RY* ( | 4) C 15        | 0.03  | 1.06  | 0.007 |
| 168. LP (  | 5) Fe 67 | /289. RY* ( | 5) C 15        | 0.03  | 3.39  | 0.012 |
| 168. LP (  | 5) Fe 67 | /317. RY* ( | 1) O 19        | 0.05  | 2.57  | 0.015 |
| 168. LP (  | 5) Fe 67 | /596. BD* ( | 1) C 6 - N 11  | 0.09  | 0.77  | 0.010 |
| 168. LP (  | 5) Fe 67 | /607. BD* ( | 1) N 12 - C 13 | 0.04  | 0.77  | 0.007 |
| 168. LP (  | 5) Fe 67 | /615. BD* ( | 1) C 15 - O 19 | 0.04  | 0.71  | 0.007 |
| 169. LP* ( | 6) Fe 67 | /176. RY* ( | 4) C 1         | 0.07  | 0.05  | 0.006 |
| 169. LP* ( | 6) Fe 67 | /182. RY* ( | 2) C 2         | 0.03  | 0.91  | 0.018 |
| 169. LP* ( | 6) Fe 67 | /200. RY* ( | 4) C 4         | 0.03  | 0.15  | 0.007 |
| 169. LP* ( | 6) Fe 67 | /205. RY* ( | 1) C 5         | 0.08  | 0.78  | 0.026 |
| 169. LP* ( | 6) Fe 67 | /206. RY* ( | 2) C 5         | 0.35  | 0.69  | 0.050 |
| 169. LP* ( | 6) Fe 67 | /207. RY* ( | 3) C 5         | 0.57  | 0.20  | 0.034 |
| 169. LP* ( | 6) Fe 67 | /208. RY* ( | 4) C 5         | 1.23  | 0.37  | 0.069 |
| 169. LP* ( | 6) Fe 67 | /213. RY* ( | 1) C 6         | 1.46  | 0.62  | 0.095 |
| 169. LP* ( | 6) Fe 67 | /214. RY* ( | 2) C 6         | 0.19  | 0.45  | 0.030 |
| 169. LP* ( | 6) Fe 67 | /215. RY* ( | 3) C 6         | 0.54  | 0.60  | 0.058 |
| 169. LP* ( | 6) Fe 67 | /216. RY* ( | 4) C 6         | 0.60  | 0.47  | 0.054 |
| 169. LP* ( | 6) Fe 67 | /217. RY* ( | 5) C 6         | 0.05  | 2.45  | 0.034 |
| 169. LP* ( | 6) Fe 67 | /218. RY* ( | 6) C 6         | 0.17  | 2.72  | 0.069 |
| 169. LP* ( | 6) Fe 67 | /220. RY* ( | 8) C 6         | 0.08  | 2.29  | 0.043 |
| 169. LP* ( | 6) Fe 67 | /237. RY* ( | 1) C 9         | 0.03  | 0.68  | 0.015 |
| 169. LP* ( | 6) Fe 67 | /238. RY* ( | 2) C 9         | 0.05  | 0.53  | 0.017 |
| 169. LP* ( | 6) Fe 67 | /247. RY* ( | 3) C 10        | 0.32  | 0.03  | 0.010 |
| 169. LP* ( | 6) Fe 67 | /248. RY* ( | 4) C 10        | 0.04  | 0.38  | 0.012 |
| 169. LP* ( | 6) Fe 67 | /253. RY* ( | 1) N 11        | 9.61  | 0.57  | 0.237 |
| 169. LP* ( | 6) Fe 67 | /254. RY* ( | 2) N 11        | 11.33 | 1.22  | 0.375 |
| 169. LP* ( | 6) Fe 67 | /255. RY* ( | 3) N 11        | 9.85  | 0.70  | 0.269 |
| 169. LP* ( | 6) Fe 67 | /256. RY* ( | 4) N 11        | 1.30  | 1.00  | 0.117 |
| 169. LP* ( | 6) Fe 67 | /258. RY* ( | 6) N 11        | 0.13  | 3.48  | 0.070 |
| 169. LP* ( | 6) Fe 67 | /261. RY* ( | 1) N 12        | 0.70  | 0.30  | 0.046 |
| 169. LP* ( | 6) Fe 67 | /262. RY* ( | 2) N 12        | 1.67  | 0.34  | 0.076 |
| 169. LP* ( | 6) Fe 67 | /263. RY* ( | 3) N 12        | 1.72  | 0.54  | 0.098 |
| 169. LP* ( | 6) Fe 67 | /264. RY* ( | 4) N 12        | 0.20  | 1.10  | 0.048 |
| 169. LP* ( | 6) Fe 67 | /265. RY* ( | 5) N 12        | 0.04  | 3.63  | 0.038 |
| 169. LP* ( | 6) Fe 67 | /269. RY* ( | 1) C 13        | 0.06  | 0.59  | 0.019 |
| 169. LP* ( | 6) Fe 67 | /270. RY* ( | 2) C 13        | 0.07  | 0.91  | 0.026 |
| 169. LP* ( | 6) Fe 67 | /271. RY* ( | 3) C 13        | 1.18  | 0.41  | 0.071 |
| 169. LP* ( | 6) Fe 67 | /273. RY* ( | 5) C 13        | 0.05  | 2.18  | 0.033 |
| 169. LP* ( | 6) Fe 67 | /274. RY* ( | 6) C 13        | 0.03  | 2.93  | 0.032 |
| 169. LP* ( | 6) Fe 67 | /279. RY* ( | 3) C 14        | 2.55  | 0.02  | 0.021 |
| 169. LP* ( | 6) Fe 67 | /280. RY* ( | 4) C 14        | 0.14  | 0.39  | 0.024 |
| 169. LP* ( | 6) Fe 67 | /282. RY* ( | 6) C 14        | 0.03  | 2.05  | 0.024 |
| 169. LP* ( | 6) Fe 67 | /285. RY* ( | 1) C 15        | 7.44  | 0.60  | 0.212 |
| 169. LP* ( | 6) Fe 67 | /286. RY* ( | 2) C 15        | 1.34  | 0.90  | 0.112 |
| 169. LP* ( | 6) Fe 67 | /288. RY* ( | 4) C 15        | 6.46  | 0.14  | 0.097 |
| 169. LP* ( | 6) Fe 67 | /289. RY* ( | 5) C 15        | 0.72  | 2.47  | 0.137 |
| 169. LP* ( | 6) Fe 67 | /293. RY* ( | 1) C 16        | 0.08  | 0.67  | 0.023 |
| 169. LP* ( | 6) Fe 67 | /296. RY* ( | 4) C 16        | 0.05  | 0.39  | 0.015 |
| 169. LP* ( | 6) Fe 67 | /301. RY* ( | 1) C 17        | 0.26  | 0.78  | 0.046 |
| 169. LP* ( | 6) Fe 67 | /303. RY* ( | 3) C 17        | 1.77  | 0.05  | 0.030 |
| 169. LP* ( | 6) Fe 67 | /304. RY* ( | 4) C 17        | 0.09  | 0.41  | 0.019 |
| 169. LP* ( | 6) Fe 67 | /309. RY* ( | 1) C 18        | 0.03  | 0.67  | 0.013 |
| 169. LP* ( | 6) Fe 67 | /317. RY* ( | 1) O 19        | 4.65  | 1.65  | 0.282 |
| 169. LP* ( | 6) Fe 67 | /318. RY* ( | 2) O 19        | 0.23  | 0.74  | 0.042 |
| 169. LP* ( | 6) Fe 67 | /319. RY* ( | 3) O 19        | 0.17  | 0.57  | 0.032 |
| 169. LP* ( | 6) Fe 67 | /320. RY* ( | 4) O 19        | 1.13  | 1.31  | 0.124 |
| 169. LP* ( | 6) Fe 67 | /321. RY* ( | 5) O 19        | 0.11  | 4.51  | 0.073 |
| 169. LP* ( | 6) Fe 67 | /340. RY* ( | 2) H 24        | 0.07  | 1.84  | 0.036 |
| 169. LP* ( | 6) Fe 67 | /609. BD* ( | 1) C 13 - C 15 | 0.18  | 0.09  | 0.012 |

from unit 5 to unit 2  
131. CR ( 1) Fe 67

/637. BD\* ( 1) C 37 - N 42 0.03 256.19 0.114

|                    |                            |      |        |       |
|--------------------|----------------------------|------|--------|-------|
| 131. CR ( 1)Fe 67  | /656. BD* ( 1) C 46 - O 65 | 0.03 | 256.12 | 0.115 |
| 132. CR ( 2)Fe 67  | /637. BD* ( 1) C 37 - N 42 | 0.17 | 29.52  | 0.091 |
| 132. CR ( 2)Fe 67  | /647. BD* ( 1) N 42 - N 43 | 0.10 | 29.64  | 0.067 |
| 132. CR ( 2)Fe 67  | /656. BD* ( 1) C 46 - O 65 | 0.18 | 29.44  | 0.092 |
| 133. CR ( 3)Fe 67  | /437. RY* ( 3) N 42        | 0.10 | 6.03   | 0.032 |
| 133. CR ( 3)Fe 67  | /467. RY* ( 1) C 46        | 0.04 | 5.91   | 0.019 |
| 133. CR ( 3)Fe 67  | /541. RY* ( 1) O 65        | 0.04 | 6.84   | 0.021 |
| 133. CR ( 3)Fe 67  | /637. BD* ( 1) C 37 - N 42 | 0.82 | 5.12   | 0.082 |
| 133. CR ( 3)Fe 67  | /647. BD* ( 1) N 42 - N 43 | 0.47 | 5.25   | 0.063 |
| 133. CR ( 3)Fe 67  | /648. BD* ( 1) N 43 - C 44 | 0.03 | 5.12   | 0.016 |
| 133. CR ( 3)Fe 67  | /655. BD* ( 1) C 46 - C 48 | 0.05 | 5.19   | 0.021 |
| 133. CR ( 3)Fe 67  | /656. BD* ( 1) C 46 - O 65 | 0.93 | 5.05   | 0.087 |
| 135. CR ( 5)Fe 67  | /437. RY* ( 3) N 42        | 0.06 | 3.72   | 0.018 |
| 135. CR ( 5)Fe 67  | /637. BD* ( 1) C 37 - N 42 | 0.10 | 2.81   | 0.022 |
| 135. CR ( 5)Fe 67  | /647. BD* ( 1) N 42 - N 43 | 0.22 | 2.94   | 0.033 |
| 135. CR ( 5)Fe 67  | /656. BD* ( 1) C 46 - O 65 | 0.11 | 2.74   | 0.022 |
| 137. CR ( 7)Fe 67  | /637. BD* ( 1) C 37 - N 42 | 0.04 | 2.81   | 0.013 |
| 137. CR ( 7)Fe 67  | /656. BD* ( 1) C 46 - O 65 | 0.26 | 2.74   | 0.034 |
| 139. CR ( 9)Fe 67  | /637. BD* ( 1) C 37 - N 42 | 0.16 | 2.82   | 0.027 |
| 164. LP ( 1)Fe 67  | /436. RY* ( 2) N 42        | 0.09 | 1.97   | 0.017 |
| 164. LP ( 1)Fe 67  | /438. RY* ( 4) N 42        | 0.04 | 1.88   | 0.010 |
| 164. LP ( 1)Fe 67  | /467. RY* ( 1) C 46        | 0.04 | 1.57   | 0.010 |
| 164. LP ( 1)Fe 67  | /470. RY* ( 4) C 46        | 0.03 | 1.42   | 0.008 |
| 164. LP ( 1)Fe 67  | /541. RY* ( 1) O 65        | 0.47 | 2.49   | 0.043 |
| 164. LP ( 1)Fe 67  | /543. RY* ( 3) O 65        | 0.05 | 1.88   | 0.012 |
| 164. LP ( 1)Fe 67  | /647. BD* ( 1) N 42 - N 43 | 0.05 | 0.90   | 0.008 |
| 164. LP ( 1)Fe 67  | /656. BD* ( 1) C 46 - O 65 | 0.09 | 0.70   | 0.010 |
| 165. LP ( 2)Fe 67  | /435. RY* ( 1) N 42        | 0.14 | 1.66   | 0.019 |
| 165. LP ( 2)Fe 67  | /436. RY* ( 2) N 42        | 0.09 | 1.97   | 0.017 |
| 165. LP ( 2)Fe 67  | /446. RY* ( 4) N 43        | 0.03 | 2.05   | 0.009 |
| 165. LP ( 2)Fe 67  | /541. RY* ( 1) O 65        | 0.04 | 2.49   | 0.012 |
| 165. LP ( 2)Fe 67  | /637. BD* ( 1) C 37 - N 42 | 0.13 | 0.78   | 0.013 |
| 165. LP ( 2)Fe 67  | /647. BD* ( 1) N 42 - N 43 | 0.08 | 0.90   | 0.011 |
| 166. LP ( 3)Fe 67  | /435. RY* ( 1) N 42        | 0.27 | 1.65   | 0.026 |
| 166. LP ( 3)Fe 67  | /436. RY* ( 2) N 42        | 0.14 | 1.97   | 0.021 |
| 166. LP ( 3)Fe 67  | /437. RY* ( 3) N 42        | 0.09 | 1.68   | 0.015 |
| 166. LP ( 3)Fe 67  | /471. RY* ( 5) C 46        | 0.03 | 3.40   | 0.014 |
| 166. LP ( 3)Fe 67  | /541. RY* ( 1) O 65        | 0.06 | 2.49   | 0.015 |
| 166. LP ( 3)Fe 67  | /544. RY* ( 4) O 65        | 0.03 | 1.94   | 0.009 |
| 166. LP ( 3)Fe 67  | /647. BD* ( 1) N 42 - N 43 | 0.09 | 0.90   | 0.011 |
| 166. LP ( 3)Fe 67  | /656. BD* ( 1) C 46 - O 65 | 0.05 | 0.70   | 0.008 |
| 167. LP ( 4)Fe 67  | /438. RY* ( 4) N 42        | 0.07 | 1.88   | 0.015 |
| 167. LP ( 4)Fe 67  | /439. RY* ( 5) N 42        | 0.05 | 4.29   | 0.018 |
| 167. LP ( 4)Fe 67  | /467. RY* ( 1) C 46        | 0.04 | 1.56   | 0.010 |
| 167. LP ( 4)Fe 67  | /541. RY* ( 1) O 65        | 0.58 | 2.49   | 0.048 |
| 167. LP ( 4)Fe 67  | /543. RY* ( 3) O 65        | 0.09 | 1.88   | 0.016 |
| 167. LP ( 4)Fe 67  | /637. BD* ( 1) C 37 - N 42 | 0.13 | 0.77   | 0.013 |
| 167. LP ( 4)Fe 67  | /647. BD* ( 1) N 42 - N 43 | 0.37 | 0.90   | 0.023 |
| 167. LP ( 4)Fe 67  | /656. BD* ( 1) C 46 - O 65 | 0.03 | 0.70   | 0.006 |
| 168. LP ( 5)Fe 67  | /435. RY* ( 1) N 42        | 0.44 | 1.64   | 0.034 |
| 168. LP ( 5)Fe 67  | /436. RY* ( 2) N 42        | 1.19 | 1.96   | 0.061 |
| 168. LP ( 5)Fe 67  | /437. RY* ( 3) N 42        | 0.39 | 1.67   | 0.032 |
| 168. LP ( 5)Fe 67  | /441. RY* ( 7) N 42        | 0.04 | 35.62  | 0.050 |
| 168. LP ( 5)Fe 67  | /443. RY* ( 1) N 43        | 0.03 | 1.23   | 0.008 |
| 168. LP ( 5)Fe 67  | /445. RY* ( 3) N 43        | 0.05 | 1.47   | 0.011 |
| 168. LP ( 5)Fe 67  | /446. RY* ( 4) N 43        | 0.03 | 2.04   | 0.010 |
| 168. LP ( 5)Fe 67  | /541. RY* ( 1) O 65        | 0.13 | 2.48   | 0.023 |
| 168. LP ( 5)Fe 67  | /544. RY* ( 4) O 65        | 0.05 | 1.93   | 0.012 |
| 168. LP ( 5)Fe 67  | /637. BD* ( 1) C 37 - N 42 | 0.04 | 0.76   | 0.007 |
| 168. LP ( 5)Fe 67  | /648. BD* ( 1) N 43 - C 44 | 0.04 | 0.76   | 0.007 |
| 168. LP ( 5)Fe 67  | /656. BD* ( 1) C 46 - O 65 | 0.11 | 0.69   | 0.011 |
| 169. LP* ( 6)Fe 67 | /379. RY* ( 1) C 35        | 0.03 | 1.02   | 0.017 |
| 169. LP* ( 6)Fe 67 | /380. RY* ( 2) C 35        | 0.06 | 1.00   | 0.025 |
| 169. LP* ( 6)Fe 67 | /381. RY* ( 3) C 35        | 0.07 | 0.43   | 0.018 |
| 169. LP* ( 6)Fe 67 | /382. RY* ( 4) C 35        | 0.03 | 0.09   | 0.005 |
| 169. LP* ( 6)Fe 67 | /387. RY* ( 1) C 36        | 0.05 | 0.84   | 0.021 |
| 169. LP* ( 6)Fe 67 | /388. RY* ( 2) C 36        | 0.06 | 0.59   | 0.018 |
| 169. LP* ( 6)Fe 67 | /389. RY* ( 3) C 36        | 0.10 | 0.25   | 0.016 |
| 169. LP* ( 6)Fe 67 | /390. RY* ( 4) C 36        | 0.15 | 0.48   | 0.027 |
| 169. LP* ( 6)Fe 67 | /391. RY* ( 5) C 36        | 0.03 | 2.04   | 0.024 |
| 169. LP* ( 6)Fe 67 | /395. RY* ( 1) C 37        | 1.62 | 0.60   | 0.099 |

|                    |                            |       |      |       |
|--------------------|----------------------------|-------|------|-------|
| 169. LP* ( 6)Fe 67 | /396. RY* ( 2) C 37        | 2.13  | 0.57 | 0.113 |
| 169. LP* ( 6)Fe 67 | /397. RY* ( 3) C 37        | 0.06  | 0.54 | 0.019 |
| 169. LP* ( 6)Fe 67 | /398. RY* ( 4) C 37        | 2.33  | 0.42 | 0.101 |
| 169. LP* ( 6)Fe 67 | /399. RY* ( 5) C 37        | 0.27  | 2.43 | 0.083 |
| 169. LP* ( 6)Fe 67 | /400. RY* ( 6) C 37        | 0.20  | 2.60 | 0.073 |
| 169. LP* ( 6)Fe 67 | /402. RY* ( 8) C 37        | 0.20  | 2.25 | 0.068 |
| 169. LP* ( 6)Fe 67 | /421. RY* ( 3) C 40        | 0.19  | 0.05 | 0.010 |
| 169. LP* ( 6)Fe 67 | /422. RY* ( 4) C 40        | 0.06  | 0.57 | 0.018 |
| 169. LP* ( 6)Fe 67 | /435. RY* ( 1) N 42        | 3.54  | 0.72 | 0.161 |
| 169. LP* ( 6)Fe 67 | /436. RY* ( 2) N 42        | 9.00  | 1.04 | 0.309 |
| 169. LP* ( 6)Fe 67 | /437. RY* ( 3) N 42        | 12.12 | 0.75 | 0.308 |
| 169. LP* ( 6)Fe 67 | /438. RY* ( 4) N 42        | 0.87  | 0.94 | 0.093 |
| 169. LP* ( 6)Fe 67 | /440. RY* ( 6) N 42        | 0.03  | 3.47 | 0.034 |
| 169. LP* ( 6)Fe 67 | /443. RY* ( 1) N 43        | 1.87  | 0.31 | 0.076 |
| 169. LP* ( 6)Fe 67 | /444. RY* ( 2) N 43        | 1.24  | 0.34 | 0.065 |
| 169. LP* ( 6)Fe 67 | /445. RY* ( 3) N 43        | 2.26  | 0.55 | 0.114 |
| 169. LP* ( 6)Fe 67 | /446. RY* ( 4) N 43        | 0.13  | 1.12 | 0.039 |
| 169. LP* ( 6)Fe 67 | /447. RY* ( 5) N 43        | 0.03  | 3.45 | 0.035 |
| 169. LP* ( 6)Fe 67 | /451. RY* ( 1) C 44        | 0.05  | 0.61 | 0.018 |
| 169. LP* ( 6)Fe 67 | /452. RY* ( 2) C 44        | 0.07  | 0.85 | 0.025 |
| 169. LP* ( 6)Fe 67 | /453. RY* ( 3) C 44        | 1.24  | 0.38 | 0.070 |
| 169. LP* ( 6)Fe 67 | /454. RY* ( 4) C 44        | 0.05  | 0.15 | 0.009 |
| 169. LP* ( 6)Fe 67 | /455. RY* ( 5) C 44        | 0.03  | 2.22 | 0.025 |
| 169. LP* ( 6)Fe 67 | /461. RY* ( 3) C 45        | 1.38  | 0.02 | 0.018 |
| 169. LP* ( 6)Fe 67 | /462. RY* ( 4) C 45        | 0.08  | 0.40 | 0.018 |
| 169. LP* ( 6)Fe 67 | /467. RY* ( 1) C 46        | 6.27  | 0.63 | 0.201 |
| 169. LP* ( 6)Fe 67 | /468. RY* ( 2) C 46        | 1.18  | 0.87 | 0.103 |
| 169. LP* ( 6)Fe 67 | /469. RY* ( 3) C 46        | 5.01  | 0.19 | 0.100 |
| 169. LP* ( 6)Fe 67 | /470. RY* ( 4) C 46        | 0.50  | 0.49 | 0.051 |
| 169. LP* ( 6)Fe 67 | /471. RY* ( 5) C 46        | 0.59  | 2.46 | 0.124 |
| 169. LP* ( 6)Fe 67 | /474. RY* ( 8) C 46        | 0.03  | 2.18 | 0.028 |
| 169. LP* ( 6)Fe 67 | /475. RY* ( 1) C 47        | 0.05  | 0.66 | 0.019 |
| 169. LP* ( 6)Fe 67 | /478. RY* ( 4) C 47        | 0.03  | 0.43 | 0.011 |
| 169. LP* ( 6)Fe 67 | /483. RY* ( 1) C 48        | 0.17  | 0.76 | 0.036 |
| 169. LP* ( 6)Fe 67 | /486. RY* ( 4) C 48        | 0.41  | 0.26 | 0.033 |
| 169. LP* ( 6)Fe 67 | /491. RY* ( 1) C 49        | 0.03  | 0.68 | 0.014 |
| 169. LP* ( 6)Fe 67 | /515. RY* ( 1) H 55        | 0.14  | 0.02 | 0.006 |
| 169. LP* ( 6)Fe 67 | /523. RY* ( 1) H 59        | 0.06  | 0.02 | 0.004 |
| 169. LP* ( 6)Fe 67 | /528. RY* ( 2) H 61        | 0.05  | 1.79 | 0.030 |
| 169. LP* ( 6)Fe 67 | /541. RY* ( 1) O 65        | 6.41  | 1.56 | 0.322 |
| 169. LP* ( 6)Fe 67 | /543. RY* ( 3) O 65        | 0.25  | 0.95 | 0.050 |
| 169. LP* ( 6)Fe 67 | /544. RY* ( 4) O 65        | 1.99  | 1.01 | 0.145 |
| 169. LP* ( 6)Fe 67 | /545. RY* ( 5) O 65        | 0.09  | 4.51 | 0.064 |
| 169. LP* ( 6)Fe 67 | /634. BD* ( 1) C 36 - C 37 | 0.15  | 0.11 | 0.013 |
| 169. LP* ( 6)Fe 67 | /650. BD* ( 1) C 44 - C 46 | 0.24  | 0.06 | 0.012 |

from unit 5 to unit 3

|                    |                            |       |      |       |
|--------------------|----------------------------|-------|------|-------|
| 135. CR ( 5)Fe 67  | /664. BD* ( 1) O 62 - H 63 | 0.07  | 2.75 | 0.017 |
| 139. CR ( 9)Fe 67  | /665. BD* ( 1) O 62 - H 64 | 0.05  | 2.76 | 0.015 |
| 164. LP ( 1)Fe 67  | /529. RY* ( 1) O 62        | 0.15  | 2.17 | 0.023 |
| 164. LP ( 1)Fe 67  | /539. RY* ( 1) H 64        | 0.04  | 1.03 | 0.008 |
| 164. LP ( 1)Fe 67  | /664. BD* ( 1) O 62 - H 63 | 0.06  | 0.71 | 0.008 |
| 164. LP ( 1)Fe 67  | /665. BD* ( 1) O 62 - H 64 | 0.07  | 0.72 | 0.009 |
| 165. LP ( 2)Fe 67  | /529. RY* ( 1) O 62        | 0.15  | 2.17 | 0.023 |
| 166. LP ( 3)Fe 67  | /529. RY* ( 1) O 62        | 0.09  | 2.17 | 0.018 |
| 167. LP ( 4)Fe 67  | /664. BD* ( 1) O 62 - H 63 | 0.25  | 0.71 | 0.017 |
| 167. LP ( 4)Fe 67  | /665. BD* ( 1) O 62 - H 64 | 0.14  | 0.72 | 0.013 |
| 168. LP ( 5)Fe 67  | /530. RY* ( 2) O 62        | 0.03  | 1.77 | 0.009 |
| 168. LP ( 5)Fe 67  | /537. RY* ( 1) H 63        | 0.06  | 0.92 | 0.009 |
| 168. LP ( 5)Fe 67  | /539. RY* ( 1) H 64        | 0.04  | 1.01 | 0.008 |
| 168. LP ( 5)Fe 67  | /664. BD* ( 1) O 62 - H 63 | 0.04  | 0.70 | 0.007 |
| 169. LP* ( 6)Fe 67 | /529. RY* ( 1) O 62        | 15.14 | 1.24 | 0.441 |
| 169. LP* ( 6)Fe 67 | /530. RY* ( 2) O 62        | 3.21  | 0.85 | 0.168 |
| 169. LP* ( 6)Fe 67 | /531. RY* ( 3) O 62        | 1.99  | 0.54 | 0.106 |
| 169. LP* ( 6)Fe 67 | /532. RY* ( 4) O 62        | 2.17  | 0.70 | 0.126 |
| 169. LP* ( 6)Fe 67 | /535. RY* ( 7) O 62        | 0.04  | 4.34 | 0.043 |
| 169. LP* ( 6)Fe 67 | /536. RY* ( 8) O 62        | 0.15  | 4.32 | 0.084 |
| 169. LP* ( 6)Fe 67 | /539. RY* ( 1) H 64        | 38.14 | 0.09 | 0.193 |

from unit 5 to unit 4

|                   |                     |      |      |       |
|-------------------|---------------------|------|------|-------|
| 165. LP ( 2)Fe 67 | /549. RY* ( 1)C1 66 | 0.06 | 0.99 | 0.009 |
|-------------------|---------------------|------|------|-------|



|            |      |    |             |       |    |       |      |       |
|------------|------|----|-------------|-------|----|-------|------|-------|
| 168. LP (  | 5)Fe | 67 | /550. RY* ( | 2)Cl  | 66 | 0.04  | 1.03 | 0.008 |
| 168. LP (  | 5)Fe | 67 | /551. RY* ( | 3)Cl  | 66 | 0.07  | 1.78 | 0.014 |
| 169. LP* ( | 6)Fe | 67 | /549. RY* ( | 1)Cl  | 66 | 9.20  | 0.06 | 0.074 |
| 169. LP* ( | 6)Fe | 67 | /550. RY* ( | 2)Cl  | 66 | 18.89 | 0.11 | 0.144 |
| 169. LP* ( | 6)Fe | 67 | /551. RY* ( | 3)Cl  | 66 | 8.74  | 0.86 | 0.280 |
| 169. LP* ( | 6)Fe | 67 | /552. RY* ( | 4)Cl  | 66 | 0.31  | 0.22 | 0.027 |
| 169. LP* ( | 6)Fe | 67 | /553. RY* ( | 5)Cl  | 66 | 0.07  | 1.78 | 0.036 |
| 169. LP* ( | 6)Fe | 67 | /556. RY* ( | 8)Cl  | 66 | 0.08  | 1.73 | 0.037 |
| 169. LP* ( | 6)Fe | 67 | /559. RY* ( | 11)Cl | 66 | 0.23  | 1.75 | 0.065 |

within unit 5

|            |      |    |             |       |    |       |        |       |
|------------|------|----|-------------|-------|----|-------|--------|-------|
| 132. CR (  | 2)Fe | 67 | /169. LP* ( | 6)Fe  | 67 | 1.15  | 29.67  | 0.253 |
| 133. CR (  | 3)Fe | 67 | /169. LP* ( | 6)Fe  | 67 | 4.34  | 5.28   | 0.207 |
| 168. LP (  | 5)Fe | 67 | /169. LP* ( | 6)Fe  | 67 | 0.25  | 0.92   | 0.021 |
| 168. LP (  | 5)Fe | 67 | /563. RY* ( | 3)Fe  | 67 | 0.31  | 4.55   | 0.048 |
| 168. LP (  | 5)Fe | 67 | /580. RY* ( | 20)Fe | 67 | 0.34  | 48.41  | 0.162 |
| 169. LP* ( | 6)Fe | 67 | /172. LP* ( | 9)Fe  | 67 | 0.37  | 1.16   | 0.066 |
| 169. LP* ( | 6)Fe | 67 | /561. RY* ( | 1)Fe  | 67 | 15.40 | 0.11   | 0.133 |
| 169. LP* ( | 6)Fe | 67 | /562. RY* ( | 2)Fe  | 67 | 8.07  | 1.08   | 0.301 |
| 169. LP* ( | 6)Fe | 67 | /563. RY* ( | 3)Fe  | 67 | 32.10 | 3.63   | 1.101 |
| 169. LP* ( | 6)Fe | 67 | /564. RY* ( | 4)Fe  | 67 | 0.26  | 0.86   | 0.049 |
| 169. LP* ( | 6)Fe | 67 | /565. RY* ( | 5)Fe  | 67 | 1.41  | 0.94   | 0.118 |
| 169. LP* ( | 6)Fe | 67 | /567. RY* ( | 7)Fe  | 67 | 10.96 | 1.54   | 0.420 |
| 169. LP* ( | 6)Fe | 67 | /569. RY* ( | 9)Fe  | 67 | 0.33  | 8.65   | 0.174 |
| 169. LP* ( | 6)Fe | 67 | /570. RY* ( | 10)Fe | 67 | 1.58  | 5.34   | 0.297 |
| 169. LP* ( | 6)Fe | 67 | /572. RY* ( | 12)Fe | 67 | 0.47  | 6.19   | 0.174 |
| 169. LP* ( | 6)Fe | 67 | /573. RY* ( | 13)Fe | 67 | 2.11  | 6.16   | 0.368 |
| 169. LP* ( | 6)Fe | 67 | /574. RY* ( | 14)Fe | 67 | 1.05  | 5.99   | 0.257 |
| 169. LP* ( | 6)Fe | 67 | /575. RY* ( | 15)Fe | 67 | 10.89 | 164.85 | 4.335 |
| 169. LP* ( | 6)Fe | 67 | /579. RY* ( | 19)Fe | 67 | 5.07  | 729.40 | 6.221 |
| 169. LP* ( | 6)Fe | 67 | /580. RY* ( | 20)Fe | 67 | 22.26 | 47.49  | 3.327 |
